# Supplementary material for: Inhibiting quinolone biosynthesis of Burkholderia
Source: Chem Sci. 2021 Mar 26;12(20):6908–12. doi: 10.1039/d0sc06167k (PMC8153077; doi:10.1039/d0sc06167k)
Supplement: SC-012-D0SC06167K-s002 [file SC-012-D0SC06167K-s002.xlsx]

## Sheet: Legend
		no pulldown = red tabs
		pulldown = blue tabs
	Experimtental setup: Proteomic analysis B. ambifaria proteome after CAA labelling without pulldown
	(B. ambifaria was grown for 6h, 8h and 10h. At each timepoint cells were labelled with probe CAA and the proteome) analyzed by LC-MSMS)
	Legend:
	Tab name	Description
	6h_1	List of assigned proteins after proteomic analysis of CAA labelled B. ambifaria without pulldown after 6 h incubation (technical triplicates)
	6h_2
	6h_3
	8h_1	List of assigned proteins after proteomic analysis of CAA labelled B. ambifaria without pulldown after 8 h incubation (technical triplicates)
	8h_2
	8h_3
	10h_1	List of assigned proteins after proteomic analysis of CAA labelled B. ambifaria without pulldown after 10 h incubation (technical triplicate)
	10h_2
	10h_3
	6h_peptides CAA	List of detected peptides modified with probe CAA (sequence of detected peptide, protein group accessions, PMSs)
	8h_peptides CAA	List of detected peptides modified with probe CAA (sequence of detected peptide, protein group accessions, PMSs)
	10h_peptides CAA	List of detected peptides modified with probe CAA (sequence of detected peptide, protein group accessions, PMSs)
	Experimtental setup: Proteomic analysis B. ambifaria proteome after CAA labelling with pulldown
	(B. ambifaria was grown for 6h and 13h. At each timepoint cells were labelled with probe CAA and the proteome analyzed by LC-MSMS)
	Legend:
	Tab name	Description
	6h_1	List of assigned proteins after proteomic analysis of CAA labelled B. ambifaria with pulldown after 6 h incubation (technical duplicates)
	6h_2
	13h_1	List of assigned proteins after proteomic analysis of CAA labelled B. ambifaria with pulldown after 13 h incubation (technical duplicates)
	13h_2

## Sheet: 6h_1
Accession	Description	Score	Coverage	# Proteins	# Unique Peptides	# Peptides	# PSMs	# AAs	MW [kDa]	calc. pI
Q0BHT1	60 kDa chaperonin 1 OS=Burkholderia ambifaria (strain ATCC BAA-244 / AMMD) OX=339670 GN=groL1 PE=3 SV=1 - [CH601_BURCM]	10667.6	73.99	1	31	35	291	546	57.0168	5.17334
Q0B6P3	Aldehyde dehydrogenase OS=Burkholderia ambifaria (strain ATCC BAA-244 / AMMD) OX=339670 GN=Bamb_4630 PE=4 SV=1 - [Q0B6P3_BURCM]	7391.11	63.42	1	25	25	192	503	54.0589	6.32861
Q0BJC6	Adenosylhomocysteinase OS=Burkholderia ambifaria (strain ATCC BAA-244 / AMMD) OX=339670 GN=ahcY PE=3 SV=1 - [Q0BJC6_BURCM]	6710.48	86.86	1	31	31	220	472	52.1014	6.15088
Q0BI18	Chaperone protein DnaK OS=Burkholderia ambifaria (strain ATCC BAA-244 / AMMD) OX=339670 GN=dnaK PE=3 SV=1 - [DNAK_BURCM]	6606.09	67.85	1	37	37	177	650	69.8161	5.021
Q0BJ48	Elongation factor Tu OS=Burkholderia ambifaria (strain ATCC BAA-244 / AMMD) OX=339670 GN=tuf1 PE=3 SV=1 - [EFTU_BURCM]	5692.34	77.27	1	22	22	175	396	42.907	5.61768
Q0B7H6	Lysine decarboxylase OS=Burkholderia ambifaria (strain ATCC BAA-244 / AMMD) OX=339670 GN=Bamb_4345 PE=4 SV=1 - [Q0B7H6_BURCM]	4960.41	84.21	1	42	42	179	779	85.897	6.07471
Q0BAF9	Malate dehydrogenase OS=Burkholderia ambifaria (strain ATCC BAA-244 / AMMD) OX=339670 GN=mdh PE=3 SV=1 - [MDH_BURCM]	4951.63	82.93	1	26	26	134	328	35.0934	6.01123
Q0BEG5	Phosphoribosylformylglycinamidine synthase OS=Burkholderia ambifaria (strain ATCC BAA-244 / AMMD) OX=339670 GN=purL PE=3 SV=1 - [Q0BEG5_BURCM]	4921.48	59.23	1	51	52	145	1354	145.789	5.42725
Q0BJI1	Glycine dehydrogenase (decarboxylating) OS=Burkholderia ambifaria (strain ATCC BAA-244 / AMMD) OX=339670 GN=gcvP PE=3 SV=1 - [GCSP_BURCM]	4460.6	73.03	1	40	40	171	975	104.33	6.39209
Q0BDP3	Pyruvate dehydrogenase E1 component OS=Burkholderia ambifaria (strain ATCC BAA-244 / AMMD) OX=339670 GN=Bamb_2174 PE=4 SV=1 - [Q0BDP3_BURCM]	4428.86	66.15	1	47	47	169	898	100.557	5.8208
Q0BAG3	Aconitate hydratase OS=Burkholderia ambifaria (strain ATCC BAA-244 / AMMD) OX=339670 GN=Bamb_3305 PE=3 SV=1 - [Q0BAG3_BURCM]	4409.81	67.85	1	46	46	140	905	98.6721	6.34131
Q0BAF2	Citrate synthase OS=Burkholderia ambifaria (strain ATCC BAA-244 / AMMD) OX=339670 GN=Bamb_3316 PE=3 SV=1 - [Q0BAF2_BURCM]	4274.5	72.06	1	25	25	154	433	48.4072	6.80029
Q0BJ55	50S ribosomal protein L7/L12 OS=Burkholderia ambifaria (strain ATCC BAA-244 / AMMD) OX=339670 GN=rplL PE=3 SV=1 - [RL7_BURCM]	3909.27	63.71	1	6	6	114	124	12.4977	4.93213
Q0B6G1	Succinate semialdehyde dehydrogenase OS=Burkholderia ambifaria (strain ATCC BAA-244 / AMMD) OX=339670 GN=Bamb_4712 PE=3 SV=1 - [Q0B6G1_BURCM]	3900.09	82.41	1	28	28	126	489	51.7017	6.46826
Q0B6M7	5-methyltetrahydropteroyltriglutamate--homocysteine methyltransferase OS=Burkholderia ambifaria (strain ATCC BAA-244 / AMMD) OX=339670 GN=metE PE=3 SV=1 - [METE_BURCM]	3872.01	60.08	1	34	34	135	764	84.9026	5.63037
Q0B114	Uncharacterized protein OS=Burkholderia ambifaria (strain ATCC BAA-244 / AMMD) OX=339670 GN=Bamb_6616 PE=4 SV=1 - [Q0B114_BURCM]	3831.79	55.94	1	56	56	139	1448	158.9	5.74463
Q0B1N7	60 kDa chaperonin 3 OS=Burkholderia ambifaria (strain ATCC BAA-244 / AMMD) OX=339670 GN=groL3 PE=3 SV=1 - [CH603_BURCM]	3829.97	76.11	1	29	33	114	540	57.0403	5.31299
Q0BIC5	Glyceraldehyde-3-phosphate dehydrogenase OS=Burkholderia ambifaria (strain ATCC BAA-244 / AMMD) OX=339670 GN=Bamb_0539 PE=3 SV=1 - [Q0BIC5_BURCM]	3738.37	80.65	1	19	19	115	336	36.1896	6.69775
Q0BC71	Succinate--CoA ligase [ADP-forming] subunit beta OS=Burkholderia ambifaria (strain ATCC BAA-244 / AMMD) OX=339670 GN=sucC PE=3 SV=1 - [SUCC_BURCM]	3703.77	70.36	1	23	23	107	388	41.2396	5.21143
Q0BIA0	L-aspartate-binding protein / L-glutamate-binding protein OS=Burkholderia ambifaria (strain ATCC BAA-244 / AMMD) OX=339670 GN=Bamb_0564 PE=4 SV=1 - [Q0BIA0_BURCM]	3683.68	68.69	1	19	19	130	297	32.5986	8.93896
Q0BHQ5	GDP-mannose 4,6-dehydratase OS=Burkholderia ambifaria (strain ATCC BAA-244 / AMMD) OX=339670 GN=gmd PE=3 SV=1 - [Q0BHQ5_BURCM]	3666	67.63	2	19	19	108	346	38.919	6.20166
Q0BI48	Catalase-peroxidase 1 OS=Burkholderia ambifaria (strain ATCC BAA-244 / AMMD) OX=339670 GN=katG1 PE=3 SV=1 - [KATG1_BURCM]	3579.1	70.47	1	34	34	115	728	79.0837	5.87158
Q0BF71	Saccharopine dehydrogenase OS=Burkholderia ambifaria (strain ATCC BAA-244 / AMMD) OX=339670 GN=Bamb_1645 PE=4 SV=1 - [Q0BF71_BURCM]	3488.62	84.15	1	24	24	126	366	40.1265	6.15088
Q0B6G2	4-aminobutyrate aminotransferase apoenzyme OS=Burkholderia ambifaria (strain ATCC BAA-244 / AMMD) OX=339670 GN=Bamb_4711 PE=3 SV=1 - [Q0B6G2_BURCM]	3325.49	71.75	1	23	23	124	446	47.7038	7.26904
Q0BCJ6	Isocitrate dehydrogenase, NADP-dependent OS=Burkholderia ambifaria (strain ATCC BAA-244 / AMMD) OX=339670 GN=Bamb_2571 PE=4 SV=1 - [Q0BCJ6_BURCM]	3277.02	68.46	1	37	37	128	742	79.9472	6.17627
Q0BGJ6	Carbamoyl-phosphate synthase large chain OS=Burkholderia ambifaria (strain ATCC BAA-244 / AMMD) OX=339670 GN=carB PE=3 SV=1 - [Q0BGJ6_BURCM]	3243.03	58.86	1	48	48	128	1084	118.473	5.21143
Q0BJ49	Elongation factor G OS=Burkholderia ambifaria (strain ATCC BAA-244 / AMMD) OX=339670 GN=fusA PE=3 SV=1 - [Q0BJ49_BURCM]	3119.62	64.43	1	25	35	110	700	77.3552	5.5415
Q0BE32	Phosphoenolpyruvate synthase OS=Burkholderia ambifaria (strain ATCC BAA-244 / AMMD) OX=339670 GN=Bamb_2035 PE=3 SV=1 - [Q0BE32_BURCM]	3112.08	64.83	1	42	42	112	799	87.9611	5.35107
Q0BDC6	Polyribonucleotide nucleotidyltransferase OS=Burkholderia ambifaria (strain ATCC BAA-244 / AMMD) OX=339670 GN=pnp PE=3 SV=1 - [PNP_BURCM]	2994.28	52.52	1	29	29	101	714	76.9601	5.5542
Q0BEY9	Acetyl-CoA acetyltransferase OS=Burkholderia ambifaria (strain ATCC BAA-244 / AMMD) OX=339670 GN=Bamb_1728 PE=3 SV=1 - [Q0BEY9_BURCM]	2992.36	78.37	1	4	19	101	393	40.3479	7.48877
Q0BC72	Succinate--CoA ligase [ADP-forming] subunit alpha OS=Burkholderia ambifaria (strain ATCC BAA-244 / AMMD) OX=339670 GN=sucD PE=3 SV=1 - [Q0BC72_BURCM]	2966.84	60.07	1	13	13	99	293	30.804	6.69775
Q0BJK8	Amino acid/amide ABC transporter substrate-binding protein, HAAT family OS=Burkholderia ambifaria (strain ATCC BAA-244 / AMMD) OX=339670 GN=Bamb_0104 PE=4 SV=1 - [Q0BJK8_BURCM]	2908.13	68.34	1	18	18	98	379	40.1031	8.90967
Q0BFX3	Dihydrolipoyl dehydrogenase OS=Burkholderia ambifaria (strain ATCC BAA-244 / AMMD) OX=339670 GN=Bamb_1392 PE=3 SV=1 - [Q0BFX3_BURCM]	2805.28	64.92	1	25	25	89	476	50.4624	6.18896
Q0BDS3	Enolase OS=Burkholderia ambifaria (strain ATCC BAA-244 / AMMD) OX=339670 GN=eno PE=3 SV=1 - [ENO_BURCM]	2792.86	71.19	1	19	19	80	427	45.6861	4.88135
Q0BIC6	Transketolase OS=Burkholderia ambifaria (strain ATCC BAA-244 / AMMD) OX=339670 GN=Bamb_0538 PE=3 SV=1 - [Q0BIC6_BURCM]	2734.59	74.64	1	28	28	94	690	74.2555	6.12549
Q0BDG8	Aminotransferase OS=Burkholderia ambifaria (strain ATCC BAA-244 / AMMD) OX=339670 GN=Bamb_2249 PE=3 SV=1 - [Q0BDG8_BURCM]	2727.47	57.14	1	18	18	77	399	42.505	6.7124
Q0BIB5	Leucine--tRNA ligase OS=Burkholderia ambifaria (strain ATCC BAA-244 / AMMD) OX=339670 GN=leuS PE=3 SV=1 - [SYL_BURCM]	2689.68	55.56	1	32	32	80	864	95.8609	5.56689
Q0B8U2	Phosphoenolpyruvate carboxykinase [GTP] OS=Burkholderia ambifaria (strain ATCC BAA-244 / AMMD) OX=339670 GN=pckG PE=3 SV=1 - [Q0B8U2_BURCM]	2683.18	73.11	1	30	30	94	621	68.3429	6.03662
Q0BC92	Phosphoglycerate kinase OS=Burkholderia ambifaria (strain ATCC BAA-244 / AMMD) OX=339670 GN=pgk PE=3 SV=1 - [Q0BC92_BURCM]	2658.99	71.61	1	21	21	79	398	41.2058	5.51611
Q0BCK8	Isoleucine--tRNA ligase OS=Burkholderia ambifaria (strain ATCC BAA-244 / AMMD) OX=339670 GN=ileS PE=3 SV=1 - [SYI_BURCM]	2631.75	59.26	1	36	36	88	945	105.788	6.46826
Q0B466	Aldehyde dehydrogenase OS=Burkholderia ambifaria (strain ATCC BAA-244 / AMMD) OX=339670 GN=Bamb_5510 PE=3 SV=1 - [Q0B466_BURCM]	2595.79	71.49	1	24	24	73	477	51.7487	5.64307
Q0B2M2	Amino acid/amide ABC transporter substrate-binding protein, HAAT family OS=Burkholderia ambifaria (strain ATCC BAA-244 / AMMD) OX=339670 GN=Bamb_6057 PE=4 SV=1 - [Q0B2M2_BURCM]	2537	65.89	1	16	17	75	384	39.9156	8.73389
Q0BBU3	Acetyl-CoA acetyltransferase OS=Burkholderia ambifaria (strain ATCC BAA-244 / AMMD) OX=339670 GN=Bamb_2824 PE=3 SV=1 - [Q0BBU3_BURCM]	2502.82	78.37	1	3	18	89	393	40.1648	7.10791
Q0BBZ1	Aspartate--tRNA(Asp/Asn) ligase OS=Burkholderia ambifaria (strain ATCC BAA-244 / AMMD) OX=339670 GN=aspS PE=3 SV=1 - [SYDND_BURCM]	2493.75	69.67	1	31	31	95	600	67.6735	5.89697
Q0BI80	Bifunctional purine biosynthesis protein PurH OS=Burkholderia ambifaria (strain ATCC BAA-244 / AMMD) OX=339670 GN=purH PE=3 SV=1 - [PUR9_BURCM]	2467.37	81.77	1	26	26	73	521	55.4863	5.92236
Q0BCJ5	Isocitrate dehydrogenase [NADP] OS=Burkholderia ambifaria (strain ATCC BAA-244 / AMMD) OX=339670 GN=Bamb_2572 PE=4 SV=1 - [Q0BCJ5_BURCM]	2443.7	61.72	1	24	24	96	418	45.8897	5.80811
Q0BJ76	Malate dehydrogenase (Oxaloacetate-decarboxylating) (NADP(+))/Phosphate acetyltransferase OS=Burkholderia ambifaria (strain ATCC BAA-244 / AMMD) OX=339670 GN=Bamb_0237 PE=3 SV=1 - [Q0BJ76_BURCM]	2398.48	71.69	1	31	31	96	756	80.9761	6.1001
Q0B5T2	Malate synthase G OS=Burkholderia ambifaria (strain ATCC BAA-244 / AMMD) OX=339670 GN=glcB PE=3 SV=1 - [Q0B5T2_BURCM]	2392	73.34	1	33	33	93	724	78.392	6.3667
Q0BE43	Inosine-5'-monophosphate dehydrogenase OS=Burkholderia ambifaria (strain ATCC BAA-244 / AMMD) OX=339670 GN=guaB PE=3 SV=1 - [Q0BE43_BURCM]	2388.45	65.64	1	24	24	77	486	51.931	7.37158
Q0BHP2	Phosphomannomutase OS=Burkholderia ambifaria (strain ATCC BAA-244 / AMMD) OX=339670 GN=Bamb_0772 PE=4 SV=1 - [Q0BHP2_BURCM]	2359.78	68.99	1	23	23	76	487	53.0923	5.61768
Q0BGV3	Acetylornithine aminotransferase OS=Burkholderia ambifaria (strain ATCC BAA-244 / AMMD) OX=339670 GN=argD PE=3 SV=1 - [Q0BGV3_BURCM]	2336.52	85.61	1	24	24	85	410	43.8538	6.31592
Q0B4Y3	Uncharacterized protein OS=Burkholderia ambifaria (strain ATCC BAA-244 / AMMD) OX=339670 GN=Bamb_5242 PE=4 SV=1 - [Q0B4Y3_BURCM]	2322.34	66.67	1	17	17	82	342	38.2533	5.61768
Q0BC94	Fructose-1,6-bisphosphate aldolase OS=Burkholderia ambifaria (strain ATCC BAA-244 / AMMD) OX=339670 GN=Bamb_2673 PE=3 SV=1 - [Q0BC94_BURCM]	2310.05	83.33	1	20	20	87	354	38.4816	6.354
Q0BF34	Betaine-aldehyde dehydrogenase OS=Burkholderia ambifaria (strain ATCC BAA-244 / AMMD) OX=339670 GN=Bamb_1682 PE=3 SV=1 - [Q0BF34_BURCM]	2305.2	62.95	1	23	23	73	502	53.4975	7.32764
Q0BE45	GMP synthase [glutamine-hydrolyzing] OS=Burkholderia ambifaria (strain ATCC BAA-244 / AMMD) OX=339670 GN=guaA PE=3 SV=1 - [GUAA_BURCM]	2283.33	73.47	1	25	25	83	539	59.3124	6.29053
Q0BE16	Elongation factor Ts OS=Burkholderia ambifaria (strain ATCC BAA-244 / AMMD) OX=339670 GN=tsf PE=3 SV=1 - [EFTS_BURCM]	2269.2	75.09	1	17	17	74	293	31.0202	5.46533
Q0BJ16	Delta-aminolevulinic acid dehydratase OS=Burkholderia ambifaria (strain ATCC BAA-244 / AMMD) OX=339670 GN=Bamb_0297 PE=3 SV=1 - [Q0BJ16_BURCM]	2248.15	55.42	1	15	15	89	332	37.0237	5.32568
Q0B4W4	Aminotransferase, class I and II OS=Burkholderia ambifaria (strain ATCC BAA-244 / AMMD) OX=339670 GN=Bamb_5262 PE=4 SV=1 - [Q0B4W4_BURCM]	2222.3	84.21	1	22	22	70	399	43.0264	6.40479
Q0BEF5	Trigger factor OS=Burkholderia ambifaria (strain ATCC BAA-244 / AMMD) OX=339670 GN=tig PE=3 SV=1 - [TIG_BURCM]	2129.08	57.14	1	23	23	79	448	49.8566	5.07178
Q0BAY8	S-adenosylmethionine synthase OS=Burkholderia ambifaria (strain ATCC BAA-244 / AMMD) OX=339670 GN=metK PE=3 SV=1 - [METK_BURCM]	2128.87	76.96	1	20	20	66	395	42.6929	5.22412
Q0BHD6	Alanyl aminopeptidase, Metallo peptidase, MEROPS family M01 OS=Burkholderia ambifaria (strain ATCC BAA-244 / AMMD) OX=339670 GN=Bamb_0878 PE=4 SV=1 - [Q0BHD6_BURCM]	2123.65	51.06	1	34	34	72	897	99.384	5.60498
Q0BIG1	Thiol peroxidase OS=Burkholderia ambifaria (strain ATCC BAA-244 / AMMD) OX=339670 GN=tpx PE=3 SV=1 - [Q0BIG1_BURCM]	2122.3	92.22	1	9	9	49	167	17.244	5.56689
Q0BDB6	Ketol-acid reductoisomerase (NADP(+)) OS=Burkholderia ambifaria (strain ATCC BAA-244 / AMMD) OX=339670 GN=ilvC PE=3 SV=1 - [ILVC_BURCM]	2078.23	72.49	1	19	19	72	338	36.3466	6.29053
Q0BH91	30S ribosomal protein S1 OS=Burkholderia ambifaria (strain ATCC BAA-244 / AMMD) OX=339670 GN=Bamb_0923 PE=3 SV=1 - [Q0BH91_BURCM]	2074.52	45.31	1	23	23	72	576	63.0007	5.24951
Q0BIH4	Proline--tRNA ligase OS=Burkholderia ambifaria (strain ATCC BAA-244 / AMMD) OX=339670 GN=proS PE=3 SV=1 - [SYP_BURCM]	2064.02	54.33	1	23	23	72	578	63.8616	5.36377
Q0BDI4	Fumarate hydratase class I OS=Burkholderia ambifaria (strain ATCC BAA-244 / AMMD) OX=339670 GN=Bamb_2233 PE=3 SV=1 - [Q0BDI4_BURCM]	2036.76	72.39	1	28	28	85	507	54.4	6.13818
Q0BH97	Uncharacterized protein OS=Burkholderia ambifaria (strain ATCC BAA-244 / AMMD) OX=339670 GN=Bamb_0917 PE=4 SV=1 - [Q0BH97_BURCM]	1993.17	66	1	14	14	60	200	21.3512	9.36377
Q0BEG2	Glucose-6-phosphate isomerase OS=Burkholderia ambifaria (strain ATCC BAA-244 / AMMD) OX=339670 GN=pgi PE=3 SV=1 - [Q0BEG2_BURCM]	1967.27	51.26	1	23	23	63	556	60.9974	6.90283
Q0BJL5	ATP synthase subunit beta OS=Burkholderia ambifaria (strain ATCC BAA-244 / AMMD) OX=339670 GN=atpD PE=3 SV=1 - [ATPB_BURCM]	1937.74	68.97	1	22	22	66	464	50.5381	5.41455
Q0BCT8	Ornithine decarboxylase OS=Burkholderia ambifaria (strain ATCC BAA-244 / AMMD) OX=339670 GN=Bamb_2479 PE=4 SV=1 - [Q0BCT8_BURCM]	1934.19	54.68	1	29	29	66	759	85.483	5.36377
Q0BDD6	NADH-quinone oxidoreductase OS=Burkholderia ambifaria (strain ATCC BAA-244 / AMMD) OX=339670 GN=Bamb_2281 PE=3 SV=1 - [Q0BDD6_BURCM]	1917.41	56.06	1	28	28	71	776	82.7066	6.69775
Q0BAI3	6-phosphogluconate dehydrogenase, decarboxylating OS=Burkholderia ambifaria (strain ATCC BAA-244 / AMMD) OX=339670 GN=Bamb_3285 PE=3 SV=1 - [Q0BAI3_BURCM]	1914.92	78.94	1	24	24	61	470	50.7293	6.39209
Q0BIG7	Ribonucleoside-diphosphate reductase OS=Burkholderia ambifaria (strain ATCC BAA-244 / AMMD) OX=339670 GN=Bamb_0497 PE=3 SV=1 - [Q0BIG7_BURCM]	1907.85	41.24	1	29	29	63	999	109.558	6.22705
Q0B4C4	Argininosuccinate synthase OS=Burkholderia ambifaria (strain ATCC BAA-244 / AMMD) OX=339670 GN=argG PE=3 SV=1 - [ASSY_BURCM]	1904.4	58.2	1	21	21	63	445	49.2071	5.59229
Q0BIA3	Adenylosuccinate lyase OS=Burkholderia ambifaria (strain ATCC BAA-244 / AMMD) OX=339670 GN=Bamb_0561 PE=3 SV=1 - [Q0BIA3_BURCM]	1860.61	70.78	1	22	22	61	462	51.7757	6.44287
Q0B8U9	Alcohol dehydrogenase GroES domain protein OS=Burkholderia ambifaria (strain ATCC BAA-244 / AMMD) OX=339670 GN=Bamb_3870 PE=3 SV=1 - [Q0B8U9_BURCM]	1860.24	52.66	1	12	12	65	338	35.6664	6.56592
Q0BJQ7	Histone family protein DNA-binding protein OS=Burkholderia ambifaria (strain ATCC BAA-244 / AMMD) OX=339670 GN=Bamb_0055 PE=3 SV=1 - [Q0BJQ7_BURCM]	1839.21	59.78	1	7	7	43	92	9.59925	10.1987
Q0BBQ5	Ribose-phosphate pyrophosphokinase OS=Burkholderia ambifaria (strain ATCC BAA-244 / AMMD) OX=339670 GN=prs PE=3 SV=1 - [Q0BBQ5_BURCM]	1801.96	64.38	1	13	13	49	320	34.4859	6.04932
Q0BH13	3-oxoacyl-[acyl-carrier-protein] synthase 2 OS=Burkholderia ambifaria (strain ATCC BAA-244 / AMMD) OX=339670 GN=Bamb_1001 PE=3 SV=1 - [Q0BH13_BURCM]	1795.07	66.03	1	17	17	62	421	44.0531	6.1001
Q0BIT1	Uncharacterized protein OS=Burkholderia ambifaria (strain ATCC BAA-244 / AMMD) OX=339670 GN=Bamb_0383 PE=4 SV=1 - [Q0BIT1_BURCM]	1766.25	88.02	1	13	13	75	167	18.4112	7.25439
Q0BH76	Electron transfer flavoprotein beta-subunit OS=Burkholderia ambifaria (strain ATCC BAA-244 / AMMD) OX=339670 GN=Bamb_0938 PE=4 SV=1 - [Q0BH76_BURCM]	1749.21	71.08	1	13	13	51	249	26.5517	8.66064
Q0BC05	Chaperone SurA OS=Burkholderia ambifaria (strain ATCC BAA-244 / AMMD) OX=339670 GN=surA PE=3 SV=1 - [Q0BC05_BURCM]	1739.89	61.28	1	22	22	55	452	49.1676	8.646
Q0BHQ9	Mannose-6-phosphate isomerase, type 2 / mannose-1-phosphate guanylyltransferase (GDP) OS=Burkholderia ambifaria (strain ATCC BAA-244 / AMMD) OX=339670 GN=Bamb_0755 PE=3 SV=1 - [Q0BHQ9_BURCM]	1736.07	71.52	1	23	23	63	481	52.3544	5.90967
Q0B8Y9	2,5-dioxopentanoate dehydrogenase (NAD+) OS=Burkholderia ambifaria (strain ATCC BAA-244 / AMMD) OX=339670 GN=Bamb_3830 PE=4 SV=1 - [Q0B8Y9_BURCM]	1681.15	77.96	1	26	26	62	481	50.8085	6.66846
Q0BGS1	Extracellular solute-binding protein, family 1 OS=Burkholderia ambifaria (strain ATCC BAA-244 / AMMD) OX=339670 GN=Bamb_1093 PE=4 SV=1 - [Q0BGS1_BURCM]	1669.83	62.25	1	16	16	51	347	37.2347	8.90967
Q0BAC4	Aspartate-semialdehyde dehydrogenase OS=Burkholderia ambifaria (strain ATCC BAA-244 / AMMD) OX=339670 GN=asd PE=3 SV=1 - [Q0BAC4_BURCM]	1655.85	69.17	1	18	18	61	373	40.2155	5.64307
Q0BH48	Fumarate hydratase class II OS=Burkholderia ambifaria (strain ATCC BAA-244 / AMMD) OX=339670 GN=fumC PE=3 SV=1 - [Q0BH48_BURCM]	1634.29	54.96	1	15	15	44	464	49.6836	6.43018
Q0B9S9	Acetyl-CoA hydrolase OS=Burkholderia ambifaria (strain ATCC BAA-244 / AMMD) OX=339670 GN=Bamb_3540 PE=4 SV=1 - [Q0B9S9_BURCM]	1627.75	55.95	1	21	21	65	504	54.4728	6.49365
Q0BHX0	Acyl-CoA dehydrogenase domain protein OS=Burkholderia ambifaria (strain ATCC BAA-244 / AMMD) OX=339670 GN=Bamb_0694 PE=3 SV=1 - [Q0BHX0_BURCM]	1579.38	60.25	1	16	16	55	395	43.2521	6.15088
Q0BCJ1	Elongation factor G OS=Burkholderia ambifaria (strain ATCC BAA-244 / AMMD) OX=339670 GN=fusA PE=3 SV=1 - [Q0BCJ1_BURCM]	1576.94	48.51	1	13	24	63	703	77.5913	5.46533
Q0BG83	Glutamine--tRNA ligase OS=Burkholderia ambifaria (strain ATCC BAA-244 / AMMD) OX=339670 GN=glnS PE=3 SV=1 - [Q0BG83_BURCM]	1574.09	52.9	1	25	25	60	569	64.9912	6.17627
Q0BID2	Malate dehydrogenase (Oxaloacetate-decarboxylating) (NADP(+))/Phosphate acetyltransferase OS=Burkholderia ambifaria (strain ATCC BAA-244 / AMMD) OX=339670 GN=Bamb_0532 PE=4 SV=1 - [Q0BID2_BURCM]	1570.97	56.4	1	27	28	69	766	83.0399	6.06201
Q0BE05	2,3,4,5-tetrahydropyridine-2,6-dicarboxylate N-succinyltransferase OS=Burkholderia ambifaria (strain ATCC BAA-244 / AMMD) OX=339670 GN=dapD PE=3 SV=1 - [DAPD_BURCM]	1569.56	75.27	1	14	14	49	275	29.4611	5.93506
Q0BH14	Acyl carrier protein OS=Burkholderia ambifaria (strain ATCC BAA-244 / AMMD) OX=339670 GN=acpP PE=3 SV=1 - [Q0BH14_BURCM]	1537.16	43.04	1	4	4	41	79	8.70632	4.18311
Q0BG79	Alanine--tRNA ligase OS=Burkholderia ambifaria (strain ATCC BAA-244 / AMMD) OX=339670 GN=alaS PE=3 SV=1 - [SYA_BURCM]	1520	46.11	1	25	25	58	874	95.4967	6.06201
Q0BCU1	Argininosuccinate lyase OS=Burkholderia ambifaria (strain ATCC BAA-244 / AMMD) OX=339670 GN=argH PE=3 SV=1 - [Q0BCU1_BURCM]	1510.44	52.86	1	20	20	48	490	53.5996	6.34131
Q0BEW7	4-hydroxy-3-methylbut-2-en-1-yl diphosphate synthase (flavodoxin) OS=Burkholderia ambifaria (strain ATCC BAA-244 / AMMD) OX=339670 GN=ispG PE=3 SV=1 - [Q0BEW7_BURCM]	1505.42	62.79	1	17	17	42	438	46.9139	6.13818
Q0BD56	3-carboxymuconate cyclase-like protein OS=Burkholderia ambifaria (strain ATCC BAA-244 / AMMD) OX=339670 GN=Bamb_2361 PE=4 SV=1 - [Q0BD56_BURCM]	1496.66	55.66	1	17	17	42	415	44.2504	8.88037
Q0BDN1	Glutamine synthetase OS=Burkholderia ambifaria (strain ATCC BAA-244 / AMMD) OX=339670 GN=Bamb_2186 PE=3 SV=1 - [Q0BDN1_BURCM]	1457.01	62.85	1	20	20	70	471	52.2027	5.45264
Q0BJH9	Aminomethyltransferase OS=Burkholderia ambifaria (strain ATCC BAA-244 / AMMD) OX=339670 GN=gcvT PE=3 SV=1 - [Q0BJH9_BURCM]	1431.12	68.97	1	15	15	50	377	40.6557	6.53662
Q0BET2	Chaperone protein ClpB OS=Burkholderia ambifaria (strain ATCC BAA-244 / AMMD) OX=339670 GN=clpB PE=3 SV=1 - [Q0BET2_BURCM]	1421.77	45.78	2	27	27	53	865	95.9275	5.74463
Q0BG06	Threonine--tRNA ligase OS=Burkholderia ambifaria (strain ATCC BAA-244 / AMMD) OX=339670 GN=thrS PE=3 SV=1 - [SYT_BURCM]	1420.61	43.46	1	23	23	50	635	72.2606	6.40479
Q0BDN9	Oligopeptidase A, Metallo peptidase, MEROPS family M03A OS=Burkholderia ambifaria (strain ATCC BAA-244 / AMMD) OX=339670 GN=Bamb_2178 PE=3 SV=1 - [Q0BDN9_BURCM]	1417.55	47.77	1	22	22	51	695	77.0174	5.33838
Q0BDP6	Phasin family protein OS=Burkholderia ambifaria (strain ATCC BAA-244 / AMMD) OX=339670 GN=Bamb_2171 PE=4 SV=1 - [Q0BDP6_BURCM]	1414.91	86.7	1	15	15	45	188	19.8355	6.17627
Q0BJ32	30S ribosomal protein S8 OS=Burkholderia ambifaria (strain ATCC BAA-244 / AMMD) OX=339670 GN=rpsH PE=3 SV=1 - [RS8_BURCM]	1409.48	73.28	1	11	11	44	131	14.1895	9.56885
Q0BAF5	Succinate dehydrogenase flavoprotein subunit OS=Burkholderia ambifaria (strain ATCC BAA-244 / AMMD) OX=339670 GN=Bamb_3313 PE=3 SV=1 - [Q0BAF5_BURCM]	1406.01	41.29	1	19	19	47	591	64.5556	6.7124
Q0BJ53	DNA-directed RNA polymerase subunit beta' OS=Burkholderia ambifaria (strain ATCC BAA-244 / AMMD) OX=339670 GN=rpoC PE=3 SV=1 - [RPOC_BURCM]	1398.31	32.63	1	36	36	58	1413	156.151	6.85889
Q0BCE1	Kynureninase OS=Burkholderia ambifaria (strain ATCC BAA-244 / AMMD) OX=339670 GN=kynU PE=3 SV=1 - [Q0BCE1_BURCM]	1394.83	52.28	1	15	15	43	417	45.3921	6.37939
Q0BDV8	Aspartokinase OS=Burkholderia ambifaria (strain ATCC BAA-244 / AMMD) OX=339670 GN=Bamb_2109 PE=3 SV=1 - [Q0BDV8_BURCM]	1394.24	58.51	1	15	15	48	417	45.0962	5.36377
Q0BAV4	Glutamyl-tRNA(Gln) amidotransferase subunit A OS=Burkholderia ambifaria (strain ATCC BAA-244 / AMMD) OX=339670 GN=gatA PE=3 SV=1 - [GATA_BURCM]	1387.71	60.28	1	20	20	49	496	52.4103	6.27783
Q0BES0	DegT/DnrJ/EryC1/StrS aminotransferase OS=Burkholderia ambifaria (strain ATCC BAA-244 / AMMD) OX=339670 GN=Bamb_1797 PE=3 SV=1 - [Q0BES0_BURCM]	1382.18	66.58	1	17	17	46	404	44.1286	6.45557
Q0BED9	Alkyl hydroperoxide reductase/ Thiol specific antioxidant/ Mal allergen OS=Burkholderia ambifaria (strain ATCC BAA-244 / AMMD) OX=339670 GN=Bamb_1928 PE=4 SV=1 - [Q0BED9_BURCM]	1382.08	60.99	1	10	10	58	182	20.2943	5.17334
Q0BER7	NAD-dependent epimerase/dehydratase OS=Burkholderia ambifaria (strain ATCC BAA-244 / AMMD) OX=339670 GN=Bamb_1800 PE=4 SV=1 - [Q0BER7_BURCM]	1373.02	67.71	1	17	17	55	350	39.4019	6.30322
Q0B6A8	Amino acid ABC transporter substrate-binding protein, PAAT family OS=Burkholderia ambifaria (strain ATCC BAA-244 / AMMD) OX=339670 GN=Bamb_4765 PE=4 SV=1 - [Q0B6A8_BURCM]	1371.76	64.23	1	10	16	49	260	28.2015	8.90967
Q0BCV5	Inorganic pyrophosphatase OS=Burkholderia ambifaria (strain ATCC BAA-244 / AMMD) OX=339670 GN=ppa PE=3 SV=1 - [Q0BCV5_BURCM]	1367.1	75	1	13	13	58	204	22.6676	7.1665
Q0BJW0	Beta sliding clamp OS=Burkholderia ambifaria (strain ATCC BAA-244 / AMMD) OX=339670 GN=Bamb_0002 PE=3 SV=1 - [Q0BJW0_BURCM]	1364.4	63.04	1	19	19	54	368	40.7015	5.51611
Q0B5Q2	2-amino-3-ketobutyrate coenzyme A ligase OS=Burkholderia ambifaria (strain ATCC BAA-244 / AMMD) OX=339670 GN=kbl PE=3 SV=1 - [Q0B5Q2_BURCM]	1359.69	64.41	1	19	19	49	399	42.5109	6.55127
Q0BAV5	Aspartyl/glutamyl-tRNA(Asn/Gln) amidotransferase subunit B OS=Burkholderia ambifaria (strain ATCC BAA-244 / AMMD) OX=339670 GN=gatB PE=3 SV=1 - [GATB_BURCM]	1345.64	58.04	1	19	19	50	491	53.4315	5.30029
Q0BIZ2	Glutamate synthase (NADH) large subunit OS=Burkholderia ambifaria (strain ATCC BAA-244 / AMMD) OX=339670 GN=Bamb_0321 PE=4 SV=1 - [Q0BIZ2_BURCM]	1334.06	29.8	1	32	32	54	1567	170.879	6.87354
Q0BIX0	Histidinol dehydrogenase OS=Burkholderia ambifaria (strain ATCC BAA-244 / AMMD) OX=339670 GN=hisD PE=3 SV=1 - [Q0BIX0_BURCM]	1328.19	59.59	1	16	16	40	438	46.3538	5.16064
Q0BJ54	DNA-directed RNA polymerase subunit beta OS=Burkholderia ambifaria (strain ATCC BAA-244 / AMMD) OX=339670 GN=rpoB PE=3 SV=1 - [RPOB_BURCM]	1323.64	38.67	1	32	32	59	1368	153.175	5.68115
Q0BFL2	Monosaccharide ABC transporter substrate-binding protein, CUT2 family OS=Burkholderia ambifaria (strain ATCC BAA-244 / AMMD) OX=339670 GN=Bamb_1503 PE=4 SV=1 - [Q0BFL2_BURCM]	1317.14	65.51	1	18	18	45	316	33.5448	9.37842
Q0BFX5	2-oxoglutarate dehydrogenase E1 component OS=Burkholderia ambifaria (strain ATCC BAA-244 / AMMD) OX=339670 GN=Bamb_1390 PE=4 SV=1 - [Q0BFX5_BURCM]	1309.32	40.15	1	27	27	57	954	106.691	6.58057
Q0BD84	Phosphoribosylamine--glycine ligase OS=Burkholderia ambifaria (strain ATCC BAA-244 / AMMD) OX=339670 GN=purD PE=3 SV=1 - [Q0BD84_BURCM]	1304.95	48.36	1	13	13	38	426	45.5042	6.26514
Q0B467	Thiamine pyrophosphate enzyme domain protein TPP-binding protein OS=Burkholderia ambifaria (strain ATCC BAA-244 / AMMD) OX=339670 GN=Bamb_5509 PE=3 SV=1 - [Q0B467_BURCM]	1302.73	54.58	1	20	20	45	546	60.868	6.45557
Q0BIL7	Beta-ketoadipyl CoA thiolase OS=Burkholderia ambifaria (strain ATCC BAA-244 / AMMD) OX=339670 GN=Bamb_0447 PE=3 SV=1 - [Q0BIL7_BURCM]	1298.39	68	1	14	19	44	400	41.8345	6.78564
Q0BBW0	Peptidase M48, Ste24p OS=Burkholderia ambifaria (strain ATCC BAA-244 / AMMD) OX=339670 GN=Bamb_2807 PE=3 SV=1 - [Q0BBW0_BURCM]	1298.03	64.43	1	11	11	47	253	26.63	8.77783
Q0B3R0	Linocin_M18 bacteriocin protein OS=Burkholderia ambifaria (strain ATCC BAA-244 / AMMD) OX=339670 GN=Bamb_5666 PE=4 SV=1 - [Q0B3R0_BURCM]	1295.76	70.85	1	12	12	42	271	28.9699	5.10986
Q0BES6	L-threonine synthase OS=Burkholderia ambifaria (strain ATCC BAA-244 / AMMD) OX=339670 GN=Bamb_1791 PE=4 SV=1 - [Q0BES6_BURCM]	1295.01	47.2	1	16	16	40	483	52.8265	5.74463
Q0BHJ7	6,7-dimethyl-8-ribityllumazine synthase OS=Burkholderia ambifaria (strain ATCC BAA-244 / AMMD) OX=339670 GN=ribH PE=3 SV=1 - [RISB_BURCM]	1293.55	94.15	1	8	8	27	171	18.434	4.08154
Q0BDK8	Urocanate hydratase OS=Burkholderia ambifaria (strain ATCC BAA-244 / AMMD) OX=339670 GN=hutU PE=3 SV=1 - [Q0BDK8_BURCM]	1292.69	48.04	1	19	19	45	562	61.711	6.45557
Q0BIZ9	Glycerol 3-phosphate-binding protein OS=Burkholderia ambifaria (strain ATCC BAA-244 / AMMD) OX=339670 GN=Bamb_0314 PE=4 SV=1 - [Q0BIZ9_BURCM]	1276.9	50.45	1	16	16	43	444	48.1834	9.18799
Q0BJ80	N-acetyl-gamma-glutamyl-phosphate reductase OS=Burkholderia ambifaria (strain ATCC BAA-244 / AMMD) OX=339670 GN=argC PE=3 SV=1 - [Q0BJ80_BURCM]	1270.3	68.67	1	15	15	42	316	34.1374	6.32861
Q0BG01	Phenylalanine--tRNA ligase beta subunit OS=Burkholderia ambifaria (strain ATCC BAA-244 / AMMD) OX=339670 GN=pheT PE=3 SV=1 - [Q0BG01_BURCM]	1268.51	40.79	1	24	24	53	809	88.6451	5.64307
Q0BBE7	Thiol:disulfide interchange protein OS=Burkholderia ambifaria (strain ATCC BAA-244 / AMMD) OX=339670 GN=Bamb_2970 PE=3 SV=1 - [Q0BBE7_BURCM]	1258.98	57.28	1	10	10	44	213	23.3532	8.98291
Q0BHY1	Serine hydroxymethyltransferase OS=Burkholderia ambifaria (strain ATCC BAA-244 / AMMD) OX=339670 GN=glyA PE=3 SV=1 - [Q0BHY1_BURCM]	1256.86	53.6	2	14	14	43	431	46.6129	6.75635
Q0BDD5	NADH-quinone oxidoreductase subunit F OS=Burkholderia ambifaria (strain ATCC BAA-244 / AMMD) OX=339670 GN=Bamb_2282 PE=3 SV=1 - [Q0BDD5_BURCM]	1253.32	49.77	1	14	14	43	436	47.7847	6.58057
Q0BC95	Phosphoribosylaminoimidazole-succinocarboxamide synthase OS=Burkholderia ambifaria (strain ATCC BAA-244 / AMMD) OX=339670 GN=purC PE=3 SV=1 - [Q0BC95_BURCM]	1252.4	81.76	1	20	20	54	296	32.6618	5.16064
Q0BDP5	Dihydrolipoyl dehydrogenase OS=Burkholderia ambifaria (strain ATCC BAA-244 / AMMD) OX=339670 GN=Bamb_2172 PE=3 SV=1 - [Q0BDP5_BURCM]	1246.97	50.17	2	20	20	49	588	61.4918	5.42725
Q0BDP0	Bifunctional protein FolD OS=Burkholderia ambifaria (strain ATCC BAA-244 / AMMD) OX=339670 GN=folD PE=3 SV=1 - [FOLD_BURCM]	1242.06	59.3	1	10	10	38	285	29.9056	7.04932
Q0B7H9	Peptidase M20 OS=Burkholderia ambifaria (strain ATCC BAA-244 / AMMD) OX=339670 GN=Bamb_4342 PE=4 SV=1 - [Q0B7H9_BURCM]	1233.43	74.17	1	21	21	53	484	52.2417	5.24951
Q0BAY0	RNA polymerase-binding transcription factor DksA OS=Burkholderia ambifaria (strain ATCC BAA-244 / AMMD) OX=339670 GN=dksA PE=3 SV=1 - [Q0BAY0_BURCM]	1232.67	71.01	1	11	11	39	138	15.9443	5.30029
Q0B3L5	Respiratory nitrate reductase alpha subunit apoprotein OS=Burkholderia ambifaria (strain ATCC BAA-244 / AMMD) OX=339670 GN=Bamb_5711 PE=3 SV=1 - [Q0B3L5_BURCM]	1232.26	29.82	1	26	26	52	1281	142.95	6.50732
Q0BGJ5	Transcription elongation factor GreA OS=Burkholderia ambifaria (strain ATCC BAA-244 / AMMD) OX=339670 GN=greA PE=3 SV=1 - [Q0BGJ5_BURCM]	1214	77.85	1	8	8	28	158	16.9327	4.52588
Q0BHT2	10 kDa chaperonin OS=Burkholderia ambifaria (strain ATCC BAA-244 / AMMD) OX=339670 GN=groS PE=3 SV=1 - [Q0BHT2_BURCM]	1211.01	75.26	1	6	7	52	97	10.4836	6.11279
Q0BH99	OmpA/MotB domain protein OS=Burkholderia ambifaria (strain ATCC BAA-244 / AMMD) OX=339670 GN=Bamb_0915 PE=3 SV=1 - [Q0BH99_BURCM]	1209.06	32.43	1	8	8	40	222	23.9523	9.37842
Q0BJ57	50S ribosomal protein L1 OS=Burkholderia ambifaria (strain ATCC BAA-244 / AMMD) OX=339670 GN=rplA PE=3 SV=1 - [RL1_BURCM]	1204.85	63.79	1	13	13	38	232	24.2661	9.70068
Q0B6N3	Kumamolisin, Serine peptidase, MEROPS family S53 OS=Burkholderia ambifaria (strain ATCC BAA-244 / AMMD) OX=339670 GN=Bamb_4640 PE=4 SV=1 - [Q0B6N3_BURCM]	1203.62	56.52	1	17	17	43	529	54.7447	5.88428
Q0BDT5	4-hydroxy-tetrahydrodipicolinate synthase OS=Burkholderia ambifaria (strain ATCC BAA-244 / AMMD) OX=339670 GN=dapA PE=3 SV=1 - [Q0BDT5_BURCM]	1198.73	66.11	1	13	13	34	301	31.8427	6.80029
Q0BDS1	CTP synthase OS=Burkholderia ambifaria (strain ATCC BAA-244 / AMMD) OX=339670 GN=pyrG PE=3 SV=1 - [PYRG_BURCM]	1183.18	47.1	1	17	17	37	552	61.2714	6.01123
Q0BFR1	Amino acid ABC transporter substrate-binding protein, PAAT family OS=Burkholderia ambifaria (strain ATCC BAA-244 / AMMD) OX=339670 GN=Bamb_1454 PE=3 SV=1 - [Q0BFR1_BURCM]	1173.4	66.29	1	14	14	40	264	28.4151	9.45166
Q0B3F3	Acyl-CoA dehydrogenase domain protein OS=Burkholderia ambifaria (strain ATCC BAA-244 / AMMD) OX=339670 GN=Bamb_5773 PE=3 SV=1 - [Q0B3F3_BURCM]	1171.07	48.83	1	19	19	44	596	63.4882	5.78271
Q0BD43	Transaldolase OS=Burkholderia ambifaria (strain ATCC BAA-244 / AMMD) OX=339670 GN=tal PE=3 SV=1 - [TAL_BURCM]	1166.12	52.68	1	17	17	45	317	35.2963	5.32568
Q0BEZ0	3-oxoacyl-[acyl-carrier-protein] reductase OS=Burkholderia ambifaria (strain ATCC BAA-244 / AMMD) OX=339670 GN=Bamb_1727 PE=3 SV=1 - [Q0BEZ0_BURCM]	1157.52	69.92	1	12	12	37	246	26.2854	7.37158
Q0BEZ8	Cystathionine beta-lyase OS=Burkholderia ambifaria (strain ATCC BAA-244 / AMMD) OX=339670 GN=Bamb_1719 PE=3 SV=1 - [Q0BEZ8_BURCM]	1156.51	70.05	1	18	18	42	394	42.7488	6.0874
Q0BBM7	Lipoprotein OS=Burkholderia ambifaria (strain ATCC BAA-244 / AMMD) OX=339670 GN=Bamb_2890 PE=3 SV=1 - [Q0BBM7_BURCM]	1144.4	51.66	1	10	10	31	271	29.2248	9.51025
Q0BHY7	Tol-Pal system protein TolB OS=Burkholderia ambifaria (strain ATCC BAA-244 / AMMD) OX=339670 GN=tolB PE=3 SV=1 - [TOLB_BURCM]	1141.56	54.52	1	15	15	34	431	45.7213	9.61279
Q0B960	Aminotransferase OS=Burkholderia ambifaria (strain ATCC BAA-244 / AMMD) OX=339670 GN=Bamb_3759 PE=3 SV=1 - [Q0B960_BURCM]	1136.83	71	1	19	19	39	400	43.5432	6.37939
Q0BH83	Cysteine synthase OS=Burkholderia ambifaria (strain ATCC BAA-244 / AMMD) OX=339670 GN=Bamb_0931 PE=3 SV=1 - [Q0BH83_BURCM]	1124.99	75.33	1	15	15	41	300	32.4306	5.8335
Q0B5Y9	PRC-barrel domain protein OS=Burkholderia ambifaria (strain ATCC BAA-244 / AMMD) OX=339670 GN=Bamb_4885 PE=4 SV=1 - [Q0B5Y9_BURCM]	1112.17	52.82	1	5	5	60	142	14.6699	9.49561
Q0BEX8	Adenylosuccinate synthetase OS=Burkholderia ambifaria (strain ATCC BAA-244 / AMMD) OX=339670 GN=purA PE=3 SV=1 - [Q0BEX8_BURCM]	1111.39	57.14	1	20	20	44	448	48.1008	6.46826
Q0B3N4	Aconitate hydratase B OS=Burkholderia ambifaria (strain ATCC BAA-244 / AMMD) OX=339670 GN=Bamb_5692 PE=3 SV=1 - [Q0B3N4_BURCM]	1107.22	36.7	1	25	25	44	861	92.6664	5.47803
Q0BES5	Homoserine dehydrogenase OS=Burkholderia ambifaria (strain ATCC BAA-244 / AMMD) OX=339670 GN=Bamb_1792 PE=3 SV=1 - [Q0BES5_BURCM]	1099.07	49.32	1	15	15	35	442	47.073	5.63037
Q0BCP3	Sulfite reductase (NADPH) beta subunit OS=Burkholderia ambifaria (strain ATCC BAA-244 / AMMD) OX=339670 GN=Bamb_2524 PE=3 SV=1 - [Q0BCP3_BURCM]	1097.8	46.15	1	19	19	46	559	62.7231	6.63916
Q0BHI0	Thioredoxin reductase OS=Burkholderia ambifaria (strain ATCC BAA-244 / AMMD) OX=339670 GN=Bamb_0834 PE=3 SV=1 - [Q0BHI0_BURCM]	1096.01	66.76	1	14	14	43	346	37.2129	6.60986
Q0BAB2	O-succinylhomoserine sulfhydrylase OS=Burkholderia ambifaria (strain ATCC BAA-244 / AMMD) OX=339670 GN=metZ PE=3 SV=1 - [Q0BAB2_BURCM]	1093.24	53.41	1	15	15	34	410	44.3565	6.3667
Q0BIX7	Toluene tolerance family protein OS=Burkholderia ambifaria (strain ATCC BAA-244 / AMMD) OX=339670 GN=Bamb_0336 PE=4 SV=1 - [Q0BIX7_BURCM]	1090.31	61.9	1	10	10	32	210	23.7585	9.49561
Q0B3L1	2-keto-4-pentenoate hydratase-like protein OS=Burkholderia ambifaria (strain ATCC BAA-244 / AMMD) OX=339670 GN=Bamb_5715 PE=4 SV=1 - [Q0B3L1_BURCM]	1085.18	56.52	1	9	9	40	253	26.7741	5.21143
Q0BDV2	Peptidyl-prolyl cis-trans isomerase OS=Burkholderia ambifaria (strain ATCC BAA-244 / AMMD) OX=339670 GN=Bamb_2115 PE=3 SV=1 - [Q0BDV2_BURCM]	1078.66	73.3	1	12	12	45	191	20.3527	9.42236
Q0BGU7	Amino acid ABC transporter substrate-binding protein, PAAT family OS=Burkholderia ambifaria (strain ATCC BAA-244 / AMMD) OX=339670 GN=Bamb_1067 PE=3 SV=1 - [Q0BGU7_BURCM]	1074.55	59.47	1	12	12	39	264	28.0227	8.93896
Q0BDK6	Histidine ammonia-lyase OS=Burkholderia ambifaria (strain ATCC BAA-244 / AMMD) OX=339670 GN=hutH PE=3 SV=1 - [HUTH_BURCM]	1070.13	50.1	1	18	18	44	507	53.2759	6.26514
Q0BC89	Branched-chain-amino-acid aminotransferase OS=Burkholderia ambifaria (strain ATCC BAA-244 / AMMD) OX=339670 GN=ilvE PE=3 SV=1 - [Q0BC89_BURCM]	1066.44	58.96	1	14	14	37	307	33.9804	6.45557
Q0BDR3	Peptide chain release factor 2 OS=Burkholderia ambifaria (strain ATCC BAA-244 / AMMD) OX=339670 GN=prfB PE=3 SV=1 - [Q0BDR3_BURCM]	1061.07	46.55	1	15	15	30	406	45.2945	6.7417
Q0BH85	ADP-L-glycero-D-manno-heptose-6-epimerase OS=Burkholderia ambifaria (strain ATCC BAA-244 / AMMD) OX=339670 GN=hldD PE=3 SV=1 - [HLDD_BURCM]	1059.42	63.64	1	16	16	41	330	37.0366	6.27783
Q0BJH7	Oxidoreductase domain protein OS=Burkholderia ambifaria (strain ATCC BAA-244 / AMMD) OX=339670 GN=Bamb_0135 PE=4 SV=1 - [Q0BJH7_BURCM]	1058.14	80	1	15	15	38	350	37.9937	6.27783
Q0BG15	3-oxoacid CoA-transferase, A subunit OS=Burkholderia ambifaria (strain ATCC BAA-244 / AMMD) OX=339670 GN=Bamb_1350 PE=4 SV=1 - [Q0BG15_BURCM]	1058.04	79.49	1	11	11	33	234	25.2611	6.59521
Q0BCH6	Superoxide dismutase OS=Burkholderia ambifaria (strain ATCC BAA-244 / AMMD) OX=339670 GN=Bamb_2591 PE=3 SV=1 - [Q0BCH6_BURCM]	1049.74	79.69	1	10	10	38	192	21.1015	5.99854
Q0BDC8	Triosephosphate isomerase OS=Burkholderia ambifaria (strain ATCC BAA-244 / AMMD) OX=339670 GN=tpiA PE=3 SV=1 - [Q0BDC8_BURCM]	1048.61	66.53	1	7	7	27	251	25.9804	6.63916
Q0BBQ4	50S ribosomal protein L25 OS=Burkholderia ambifaria (strain ATCC BAA-244 / AMMD) OX=339670 GN=rplY PE=3 SV=1 - [RL25_BURCM]	1044.19	80.2	1	10	10	40	202	21.6105	6.52197
Q0BEM7	Uncharacterized protein OS=Burkholderia ambifaria (strain ATCC BAA-244 / AMMD) OX=339670 GN=Bamb_1840 PE=4 SV=1 - [Q0BEM7_BURCM]	1038.15	43.68	1	15	15	32	506	57.154	6.49365
Q0BH16	Malonyl CoA-acyl carrier protein transacylase OS=Burkholderia ambifaria (strain ATCC BAA-244 / AMMD) OX=339670 GN=Bamb_0998 PE=3 SV=1 - [Q0BH16_BURCM]	1035.51	88.06	1	14	14	39	310	31.7306	5.65576
Q0BJL7	ATP synthase subunit alpha OS=Burkholderia ambifaria (strain ATCC BAA-244 / AMMD) OX=339670 GN=atpA PE=3 SV=1 - [ATPA_BURCM]	1025.92	47.37	1	20	20	41	513	55.7192	5.65576
Q0BBH5	Branched chain amino acid: 2-keto-4-methylthiobutyrate aminotransferase OS=Burkholderia ambifaria (strain ATCC BAA-244 / AMMD) OX=339670 GN=Bamb_2942 PE=4 SV=1 - [Q0BBH5_BURCM]	1025.63	64.61	1	13	13	31	308	34.0757	5.71924
Q0BDR2	Lysine--tRNA ligase OS=Burkholderia ambifaria (strain ATCC BAA-244 / AMMD) OX=339670 GN=lysS PE=3 SV=1 - [SYK_BURCM]	1011.32	45.87	1	16	16	34	508	57.483	5.40186
Q0BH75	Electron transfer flavoprotein, alpha subunit OS=Burkholderia ambifaria (strain ATCC BAA-244 / AMMD) OX=339670 GN=Bamb_0939 PE=4 SV=1 - [Q0BH75_BURCM]	1008.18	71.06	2	12	12	38	311	31.6347	5.07178
Q0B9T6	2-aminoethylphosphonate--pyruvate transaminase OS=Burkholderia ambifaria (strain ATCC BAA-244 / AMMD) OX=339670 GN=phnW PE=3 SV=1 - [Q0B9T6_BURCM]	1002.8	64.69	1	15	15	39	354	38.1117	6.75635
Q0BBE1	Carbonate dehydratase OS=Burkholderia ambifaria (strain ATCC BAA-244 / AMMD) OX=339670 GN=Bamb_2976 PE=4 SV=1 - [Q0BBE1_BURCM]	996.2	67.19	1	11	11	31	256	28.2511	6.25244
Q0BEP0	Ankyrin OS=Burkholderia ambifaria (strain ATCC BAA-244 / AMMD) OX=339670 GN=Bamb_1827 PE=4 SV=1 - [Q0BEP0_BURCM]	982.53	68.64	1	12	12	41	236	24.6491	7.06396
Q0B712	NAD/NADP-dependent betaine aldehyde dehydrogenase OS=Burkholderia ambifaria (strain ATCC BAA-244 / AMMD) OX=339670 GN=betB PE=3 SV=1 - [BETB_BURCM]	973.61	62.17	1	19	19	41	489	52.2938	5.68115
Q0BCL6	L-aspartate oxidase OS=Burkholderia ambifaria (strain ATCC BAA-244 / AMMD) OX=339670 GN=Bamb_2551 PE=3 SV=1 - [Q0BCL6_BURCM]	965.36	46.21	1	16	16	34	528	57.9317	6.75635
Q0BDV1	Peptidyl-prolyl cis-trans isomerase OS=Burkholderia ambifaria (strain ATCC BAA-244 / AMMD) OX=339670 GN=Bamb_2116 PE=3 SV=1 - [Q0BDV1_BURCM]	964.94	92.64	1	12	12	43	163	17.7649	6.18896
Q0BIG2	PfkB domain protein OS=Burkholderia ambifaria (strain ATCC BAA-244 / AMMD) OX=339670 GN=Bamb_0502 PE=4 SV=1 - [Q0BIG2_BURCM]	959.01	64.06	1	16	16	32	320	34.4614	5.73193
Q0BJ77	Orotate phosphoribosyltransferase OS=Burkholderia ambifaria (strain ATCC BAA-244 / AMMD) OX=339670 GN=pyrE PE=3 SV=1 - [Q0BJ77_BURCM]	957.23	65.35	1	12	12	46	228	25.513	6.65381
Q0BE17	Uridylate kinase OS=Burkholderia ambifaria (strain ATCC BAA-244 / AMMD) OX=339670 GN=pyrH PE=3 SV=1 - [PYRH_BURCM]	949.22	54.85	1	9	9	37	237	25.1871	8.11865
Q0BIL6	Phenylacetic acid degradation protein paaN OS=Burkholderia ambifaria (strain ATCC BAA-244 / AMMD) OX=339670 GN=Bamb_0448 PE=4 SV=1 - [Q0BIL6_BURCM]	942.62	38.03	1	14	14	31	568	60.375	6.30322
Q0BDY7	Isocitrate lyase OS=Burkholderia ambifaria (strain ATCC BAA-244 / AMMD) OX=339670 GN=Bamb_2080 PE=4 SV=1 - [Q0BDY7_BURCM]	936.24	57.47	1	17	17	39	435	47.6939	6.16357
Q0BIA1	Glutamate dehydrogenase OS=Burkholderia ambifaria (strain ATCC BAA-244 / AMMD) OX=339670 GN=Bamb_0563 PE=3 SV=1 - [Q0BIA1_BURCM]	934.94	52.1	1	14	14	42	428	46.4528	6.7417
Q0BJ56	50S ribosomal protein L10 OS=Burkholderia ambifaria (strain ATCC BAA-244 / AMMD) OX=339670 GN=rplJ PE=3 SV=1 - [Q0BJ56_BURCM]	927.22	48.94	1	7	7	24	188	20.5331	9.80322
Q0B5P2	3-hydroxybutyrate dehydrogenase OS=Burkholderia ambifaria (strain ATCC BAA-244 / AMMD) OX=339670 GN=Bamb_4982 PE=3 SV=1 - [Q0B5P2_BURCM]	917.94	51.72	1	2	11	34	261	27.3372	6.53662
Q0BHS3	Dihydroorotase OS=Burkholderia ambifaria (strain ATCC BAA-244 / AMMD) OX=339670 GN=Bamb_0741 PE=4 SV=1 - [Q0BHS3_BURCM]	917.61	64.02	1	15	15	33	428	45.0365	5.77002
Q0BG67	Short-chain dehydrogenase/reductase SDR OS=Burkholderia ambifaria (strain ATCC BAA-244 / AMMD) OX=339670 GN=Bamb_1298 PE=4 SV=1 - [Q0BG67_BURCM]	916.3	84.68	1	12	13	28	248	25.1442	5.60498
Q0BIM5	Anthranilate synthase component 1 OS=Burkholderia ambifaria (strain ATCC BAA-244 / AMMD) OX=339670 GN=trpE PE=3 SV=1 - [Q0BIM5_BURCM]	910.25	48.29	1	19	19	39	497	55.2057	5.64307
Q0BB88	Glutamine--fructose-6-phosphate aminotransferase [isomerizing] OS=Burkholderia ambifaria (strain ATCC BAA-244 / AMMD) OX=339670 GN=glmS PE=3 SV=1 - [Q0BB88_BURCM]	908.13	51.9	2	18	18	32	605	65.4639	6.30322
Q0BBY0	L-threonine dehydratase OS=Burkholderia ambifaria (strain ATCC BAA-244 / AMMD) OX=339670 GN=ilvA PE=3 SV=1 - [Q0BBY0_BURCM]	905.89	55.23	1	18	19	45	507	55.4084	6.16357
Q0BF41	Putrescine-binding periplasmic protein OS=Burkholderia ambifaria (strain ATCC BAA-244 / AMMD) OX=339670 GN=Bamb_1675 PE=3 SV=1 - [Q0BF41_BURCM]	904.79	55.22	1	13	13	38	364	40.0608	8.88037
Q0BAC8	3-isopropylmalate dehydratase large subunit OS=Burkholderia ambifaria (strain ATCC BAA-244 / AMMD) OX=339670 GN=leuC PE=3 SV=1 - [LEUC_BURCM]	903.65	53.73	1	16	16	33	469	50.6894	5.92236
Q0BGZ7	Elongation factor P OS=Burkholderia ambifaria (strain ATCC BAA-244 / AMMD) OX=339670 GN=efp PE=3 SV=1 - [EFP_BURCM]	901.75	47.03	1	8	8	35	185	20.8273	4.90674
Q0BDL7	Aminotransferase OS=Burkholderia ambifaria (strain ATCC BAA-244 / AMMD) OX=339670 GN=Bamb_2200 PE=3 SV=1 - [Q0BDL7_BURCM]	898.52	64.43	2	18	18	38	461	50.8208	6.771
Q0BCG4	UPF0234 protein Bamb_2603 OS=Burkholderia ambifaria (strain ATCC BAA-244 / AMMD) OX=339670 GN=Bamb_2603 PE=3 SV=1 - [Y2603_BURCM]	897.14	45.34	1	9	9	27	161	18.1357	9.20264
Q0BB27	Extracellular solute-binding protein, family 5 OS=Burkholderia ambifaria (strain ATCC BAA-244 / AMMD) OX=339670 GN=Bamb_3090 PE=4 SV=1 - [Q0BB27_BURCM]	896.36	57.75	1	20	20	48	542	60.2515	8.66064
Q0B6A7	Succinylglutamate desuccinylase/aspartoacylase OS=Burkholderia ambifaria (strain ATCC BAA-244 / AMMD) OX=339670 GN=Bamb_4766 PE=4 SV=1 - [Q0B6A7_BURCM]	892.63	60.65	1	15	15	37	371	40.372	5.5542
Q0BC93	Pyruvate kinase OS=Burkholderia ambifaria (strain ATCC BAA-244 / AMMD) OX=339670 GN=Bamb_2674 PE=3 SV=1 - [Q0BC93_BURCM]	891.99	44.14	1	12	12	31	478	51.3246	5.87158
Q0B106	TrbM family protein OS=Burkholderia ambifaria (strain ATCC BAA-244 / AMMD) OX=339670 GN=Bamb_6624 PE=4 SV=1 - [Q0B106_BURCM]	891.2	67.69	1	9	9	26	195	21.5297	8.23584
Q0BBS8	UvrABC system protein A OS=Burkholderia ambifaria (strain ATCC BAA-244 / AMMD) OX=339670 GN=uvrA PE=3 SV=1 - [Q0BBS8_BURCM]	889.79	46.2	1	26	26	44	961	106.324	6.62451
Q0BDZ6	Alanine racemase OS=Burkholderia ambifaria (strain ATCC BAA-244 / AMMD) OX=339670 GN=Bamb_2071 PE=3 SV=1 - [Q0BDZ6_BURCM]	886.73	52.53	1	11	12	29	356	38.1736	7.47412
Q0BCN0	Oxidoreductase FAD/NAD(P)-binding domain protein OS=Burkholderia ambifaria (strain ATCC BAA-244 / AMMD) OX=339670 GN=Bamb_2537 PE=4 SV=1 - [Q0BCN0_BURCM]	881.97	51.9	1	12	12	29	343	37.9251	6.40479
Q0BEV0	Transcription termination factor Rho OS=Burkholderia ambifaria (strain ATCC BAA-244 / AMMD) OX=339670 GN=rho PE=3 SV=1 - [Q0BEV0_BURCM]	873.58	36.43	1	11	11	27	420	47.3419	6.99072
Q0BH98	DNA gyrase subunit A OS=Burkholderia ambifaria (strain ATCC BAA-244 / AMMD) OX=339670 GN=gyrA PE=3 SV=1 - [Q0BH98_BURCM]	871.47	31.37	1	18	18	32	867	96.3273	5.42725
Q0BI20	Protein GrpE OS=Burkholderia ambifaria (strain ATCC BAA-244 / AMMD) OX=339670 GN=grpE PE=3 SV=1 - [Q0BI20_BURCM]	865.92	82.87	1	11	11	32	181	19.361	5.04639
Q0BCH1	Adenylate kinase OS=Burkholderia ambifaria (strain ATCC BAA-244 / AMMD) OX=339670 GN=adk PE=3 SV=1 - [KAD_BURCM]	860.04	48.18	1	9	9	28	220	24.1416	6.62451
Q0BFY4	Transcription termination/antitermination protein NusA OS=Burkholderia ambifaria (strain ATCC BAA-244 / AMMD) OX=339670 GN=nusA PE=3 SV=1 - [Q0BFY4_BURCM]	858.48	45.62	1	17	17	35	491	54.7873	4.69092
Q0BH35	D-isomer specific 2-hydroxyacid dehydrogenase, NAD-binding protein OS=Burkholderia ambifaria (strain ATCC BAA-244 / AMMD) OX=339670 GN=Bamb_0979 PE=3 SV=1 - [Q0BH35_BURCM]	842.62	59.57	1	13	13	27	329	34.9791	6.3667
Q0BJC2	Carboxymethylenebutenolidase OS=Burkholderia ambifaria (strain ATCC BAA-244 / AMMD) OX=339670 GN=Bamb_0190 PE=4 SV=1 - [Q0BJC2_BURCM]	838.73	58.7	1	8	8	21	230	24.4065	6.29053
Q0BHP6	UDP-galactose 4-epimerase OS=Burkholderia ambifaria (strain ATCC BAA-244 / AMMD) OX=339670 GN=Bamb_0768 PE=4 SV=1 - [Q0BHP6_BURCM]	835.06	63.53	1	13	13	26	340	36.7168	5.99854
Q0BI34	Phospho-2-dehydro-3-deoxyheptonate aldolase OS=Burkholderia ambifaria (strain ATCC BAA-244 / AMMD) OX=339670 GN=Bamb_0630 PE=3 SV=1 - [Q0BI34_BURCM]	833.01	46.5	1	13	14	29	357	38.8288	6.68311
Q0B9X9	Alanine racemase OS=Burkholderia ambifaria (strain ATCC BAA-244 / AMMD) OX=339670 GN=Bamb_3490 PE=3 SV=1 - [Q0B9X9_BURCM]	832.87	52.55	1	10	11	26	373	40.2927	6.75635
Q0BDG7	3-hydroxybutyrate dehydrogenase OS=Burkholderia ambifaria (strain ATCC BAA-244 / AMMD) OX=339670 GN=Bamb_2250 PE=3 SV=1 - [Q0BDG7_BURCM]	826.44	51.53	1	1	10	31	262	27.3042	6.53662
Q0BAC5	3-isopropylmalate dehydrogenase OS=Burkholderia ambifaria (strain ATCC BAA-244 / AMMD) OX=339670 GN=leuB PE=3 SV=1 - [Q0BAC5_BURCM]	823.04	56.62	1	15	15	35	355	38.1837	5.30029
Q0BJ45	50S ribosomal protein L4 OS=Burkholderia ambifaria (strain ATCC BAA-244 / AMMD) OX=339670 GN=rplD PE=3 SV=1 - [RL4_BURCM]	819.35	58.74	1	9	9	20	206	22.9802	9.51025
Q0BBF6	Fumarylacetoacetate (FAA) hydrolase OS=Burkholderia ambifaria (strain ATCC BAA-244 / AMMD) OX=339670 GN=Bamb_2961 PE=4 SV=1 - [Q0BBF6_BURCM]	813.14	50.91	1	13	13	25	330	35.8769	5.45264
Q0B9S3	Dihydroxy-acid dehydratase OS=Burkholderia ambifaria (strain ATCC BAA-244 / AMMD) OX=339670 GN=ilvD PE=3 SV=1 - [Q0B9S3_BURCM]	811.08	42.65	1	17	17	37	619	66.3285	6.04932
Q0B103	TrbJ protein of DNA transfer system OS=Burkholderia ambifaria (strain ATCC BAA-244 / AMMD) OX=339670 GN=Bamb_6627 PE=4 SV=1 - [Q0B103_BURCM]	807.51	44.49	1	8	8	23	254	27.4259	8.90967
Q0BCM9	Acetylornithine aminotransferase OS=Burkholderia ambifaria (strain ATCC BAA-244 / AMMD) OX=339670 GN=argD PE=3 SV=1 - [Q0BCM9_BURCM]	806.05	43.44	1	12	12	29	465	50.8791	6.62451
Q0BHJ2	Glutamate-1-semialdehyde 2,1-aminomutase OS=Burkholderia ambifaria (strain ATCC BAA-244 / AMMD) OX=339670 GN=hemL PE=3 SV=1 - [GSA_BURCM]	805.52	49.18	1	15	15	31	427	44.9308	6.0874
Q0BJ14	Cytochrome c, class I OS=Burkholderia ambifaria (strain ATCC BAA-244 / AMMD) OX=339670 GN=Bamb_0299 PE=4 SV=1 - [Q0BJ14_BURCM]	802.83	47.47	1	8	8	23	217	22.5002	8.74854
Q0B790	L-valine-binding protein / L-isoleucine-binding protein / L-leucine-binding protein OS=Burkholderia ambifaria (strain ATCC BAA-244 / AMMD) OX=339670 GN=Bamb_4432 PE=4 SV=1 - [Q0B790_BURCM]	801.75	49.46	1	11	12	24	372	39.009	8.83643
Q0BG31	FAD linked oxidase domain protein OS=Burkholderia ambifaria (strain ATCC BAA-244 / AMMD) OX=339670 GN=Bamb_1334 PE=4 SV=1 - [Q0BG31_BURCM]	797.74	45.03	1	11	11	25	473	50.4261	6.34131
Q0BJC4	Methylenetetrahydrofolate reductase OS=Burkholderia ambifaria (strain ATCC BAA-244 / AMMD) OX=339670 GN=Bamb_0188 PE=3 SV=1 - [Q0BJC4_BURCM]	793.62	76.45	1	14	14	34	276	30.4355	7.50342
Q0BEQ9	50S ribosomal protein L9 OS=Burkholderia ambifaria (strain ATCC BAA-244 / AMMD) OX=339670 GN=rplI PE=3 SV=1 - [RL9_BURCM]	789.15	53.33	1	10	10	25	150	16.3508	7.50342
Q0BGV0	N-succinylglutamate 5-semialdehyde dehydrogenase OS=Burkholderia ambifaria (strain ATCC BAA-244 / AMMD) OX=339670 GN=astD PE=3 SV=1 - [ASTD_BURCM]	783.04	42.51	1	12	12	28	487	51.8244	6.25244
Q0BIJ1	Arginine biosynthesis bifunctional protein ArgJ OS=Burkholderia ambifaria (strain ATCC BAA-244 / AMMD) OX=339670 GN=argJ PE=3 SV=1 - [Q0BIJ1_BURCM]	779.42	42.13	1	12	12	27	413	43.5635	5.59229
Q0BEX7	ATP phosphoribosyltransferase regulatory subunit OS=Burkholderia ambifaria (strain ATCC BAA-244 / AMMD) OX=339670 GN=hisZ PE=3 SV=1 - [HISZ_BURCM]	765.9	55.24	1	16	16	32	382	41.6278	5.80811
Q0BGJ8	Carbamoyl-phosphate synthase small chain OS=Burkholderia ambifaria (strain ATCC BAA-244 / AMMD) OX=339670 GN=carA PE=3 SV=1 - [Q0BGJ8_BURCM]	763.11	41.58	1	12	12	27	380	40.7656	5.92236
Q0BFN1	Aldo/keto reductase OS=Burkholderia ambifaria (strain ATCC BAA-244 / AMMD) OX=339670 GN=Bamb_1484 PE=4 SV=1 - [Q0BFN1_BURCM]	761.67	34	1	9	9	25	350	38.846	6.81494
Q0BJ43	50S ribosomal protein L2 OS=Burkholderia ambifaria (strain ATCC BAA-244 / AMMD) OX=339670 GN=rplB PE=3 SV=1 - [RL2_BURCM]	761.4	52	1	12	12	27	275	30.082	11.3413
Q0B7H8	2-nitropropane dioxygenase, NPD OS=Burkholderia ambifaria (strain ATCC BAA-244 / AMMD) OX=339670 GN=Bamb_4343 PE=4 SV=1 - [Q0B7H8_BURCM]	758.69	61.58	1	12	12	26	354	36.985	6.43018
Q0BJ87	6-phosphogluconate dehydrogenase, NAD-binding protein OS=Burkholderia ambifaria (strain ATCC BAA-244 / AMMD) OX=339670 GN=Bamb_0226 PE=4 SV=1 - [Q0BJ87_BURCM]	757.34	56.75	1	9	9	22	289	30.1607	6.02393
Q0BID7	Orotidine 5'-phosphate decarboxylase OS=Burkholderia ambifaria (strain ATCC BAA-244 / AMMD) OX=339670 GN=pyrF PE=3 SV=1 - [Q0BID7_BURCM]	757.07	65.82	1	11	11	29	275	29.804	5.33838
Q0BBK5	2,3-bisphosphoglycerate-dependent phosphoglycerate mutase OS=Burkholderia ambifaria (strain ATCC BAA-244 / AMMD) OX=339670 GN=gpmA PE=3 SV=1 - [GPMA_BURCM]	754.61	53.23	1	11	11	28	248	27.9385	6.55127
Q0BIJ9	D-alanine--D-alanine ligase OS=Burkholderia ambifaria (strain ATCC BAA-244 / AMMD) OX=339670 GN=ddl PE=3 SV=1 - [DDL_BURCM]	752.2	61.34	1	14	14	33	313	33.3862	5.32568
Q0BEY3	Uncharacterized protein OS=Burkholderia ambifaria (strain ATCC BAA-244 / AMMD) OX=339670 GN=Bamb_1734 PE=4 SV=1 - [Q0BEY3_BURCM]	752.05	76.06	1	6	6	28	71	8.35346	6.94678
Q0BBJ9	Glutathione synthetase OS=Burkholderia ambifaria (strain ATCC BAA-244 / AMMD) OX=339670 GN=gshB PE=3 SV=1 - [Q0BBJ9_BURCM]	750.74	45.28	1	10	10	28	318	34.7127	5.93506
Q0BIL5	Short chain enoyl-CoA hydratase OS=Burkholderia ambifaria (strain ATCC BAA-244 / AMMD) OX=339670 GN=Bamb_0449 PE=3 SV=1 - [Q0BIL5_BURCM]	749.99	42.25	1	9	9	24	258	27.9402	5.56689
Q0BE18	Ribosome-recycling factor OS=Burkholderia ambifaria (strain ATCC BAA-244 / AMMD) OX=339670 GN=frr PE=3 SV=1 - [RRF_BURCM]	746.89	36.56	1	5	5	26	186	20.786	8.27979
Q0B1N6	10 kDa chaperonin OS=Burkholderia ambifaria (strain ATCC BAA-244 / AMMD) OX=339670 GN=groS PE=3 SV=1 - [Q0B1N6_BURCM]	743.72	82.86	1	6	7	26	105	11.32	5.24951
Q0BCF0	Cyclopropane-fatty-acyl-phospholipid synthase OS=Burkholderia ambifaria (strain ATCC BAA-244 / AMMD) OX=339670 GN=Bamb_2617 PE=4 SV=1 - [Q0BCF0_BURCM]	743.07	39.16	1	10	10	26	406	45.9424	6.13818
Q0BDT3	Tryptophan--tRNA ligase OS=Burkholderia ambifaria (strain ATCC BAA-244 / AMMD) OX=339670 GN=trpS PE=3 SV=1 - [Q0BDT3_BURCM]	740.14	41	1	15	15	35	400	45.4139	6.30322
Q0BED4	Acetylornithine deacetylase OS=Burkholderia ambifaria (strain ATCC BAA-244 / AMMD) OX=339670 GN=Bamb_1933 PE=3 SV=1 - [Q0BED4_BURCM]	739.25	47.54	1	10	10	26	406	43.7232	5.68115
Q0BJ31	50S ribosomal protein L6 OS=Burkholderia ambifaria (strain ATCC BAA-244 / AMMD) OX=339670 GN=rplF PE=3 SV=1 - [RL6_BURCM]	738.53	77.27	1	11	11	28	176	18.6841	9.65674
Q0BJ08	Iron-sulfur cluster assembly protein CyaY OS=Burkholderia ambifaria (strain ATCC BAA-244 / AMMD) OX=339670 GN=cyaY PE=3 SV=1 - [CYAY_BURCM]	734.76	69.44	1	6	6	17	108	11.9909	4.77979
Q0BE06	Succinyldiaminopimelate aminotransferase apoenzyme OS=Burkholderia ambifaria (strain ATCC BAA-244 / AMMD) OX=339670 GN=Bamb_2061 PE=4 SV=1 - [Q0BE06_BURCM]	733.15	50.9	1	12	12	25	387	41.7783	6.18896
Q0BCG6	Ornithine carbamoyltransferase OS=Burkholderia ambifaria (strain ATCC BAA-244 / AMMD) OX=339670 GN=argF PE=3 SV=1 - [Q0BCG6_BURCM]	724.83	30.36	1	11	11	29	560	63.1454	8.66064
Q0BI94	Dihydroorotase OS=Burkholderia ambifaria (strain ATCC BAA-244 / AMMD) OX=339670 GN=pyrC PE=3 SV=1 - [Q0BI94_BURCM]	723.45	74.86	1	17	17	38	354	38.5735	6.63916
Q0BIB2	Gamma-glutamyl phosphate reductase OS=Burkholderia ambifaria (strain ATCC BAA-244 / AMMD) OX=339670 GN=proA PE=3 SV=1 - [PROA_BURCM]	723.1	33.1	1	11	11	22	423	45.1035	6.17627
Q0BIP6	Peptidase M24 OS=Burkholderia ambifaria (strain ATCC BAA-244 / AMMD) OX=339670 GN=Bamb_0418 PE=4 SV=1 - [Q0BIP6_BURCM]	722.29	39.24	1	15	15	28	604	65.1594	6.34131
Q0BI76	Aminopeptidase P, Metallo peptidase, MEROPS family M24B OS=Burkholderia ambifaria (strain ATCC BAA-244 / AMMD) OX=339670 GN=Bamb_0588 PE=3 SV=1 - [Q0BI76_BURCM]	721.47	44.18	1	16	16	32	464	50.6884	5.60498
Q0BE97	Uncharacterized protein OS=Burkholderia ambifaria (strain ATCC BAA-244 / AMMD) OX=339670 GN=Bamb_1970 PE=4 SV=1 - [Q0BE97_BURCM]	721.13	39.02	1	19	19	30	738	80.5699	6.85889
Q0BDN5	Exodeoxyribonuclease III OS=Burkholderia ambifaria (strain ATCC BAA-244 / AMMD) OX=339670 GN=Bamb_2182 PE=4 SV=1 - [Q0BDN5_BURCM]	719.1	47.97	1	11	11	20	271	31.0547	6.17627
Q0B9E6	MOSC domain protein beta barrel domain protein OS=Burkholderia ambifaria (strain ATCC BAA-244 / AMMD) OX=339670 GN=Bamb_3673 PE=4 SV=1 - [Q0B9E6_BURCM]	716.43	57.64	1	9	9	24	288	31.3548	4.85596
Q0BFY3	Translation initiation factor IF-2 OS=Burkholderia ambifaria (strain ATCC BAA-244 / AMMD) OX=339670 GN=infB PE=3 SV=1 - [IF2_BURCM]	716.11	23.27	1	14	14	25	971	104.261	6.43018
Q0B452	Dyp-type peroxidase family OS=Burkholderia ambifaria (strain ATCC BAA-244 / AMMD) OX=339670 GN=Bamb_5524 PE=4 SV=1 - [Q0B452_BURCM]	713.33	39.93	1	8	8	19	293	32.0549	5.03369
Q0BHQ4	NAD-dependent epimerase/dehydratase OS=Burkholderia ambifaria (strain ATCC BAA-244 / AMMD) OX=339670 GN=Bamb_0760 PE=4 SV=1 - [Q0BHQ4_BURCM]	712.72	41.64	1	10	10	19	305	33.3322	5.57959
Q0BH96	Phosphoserine aminotransferase OS=Burkholderia ambifaria (strain ATCC BAA-244 / AMMD) OX=339670 GN=serC PE=3 SV=1 - [SERC_BURCM]	712.3	28.33	1	7	7	20	360	39.329	5.85889
Q0BBS6	Formyltetrahydrofolate deformylase OS=Burkholderia ambifaria (strain ATCC BAA-244 / AMMD) OX=339670 GN=purU PE=3 SV=1 - [Q0BBS6_BURCM]	711.2	38.78	1	8	8	22	294	32.9407	6.52197
Q0BHY2	Short-chain dehydrogenase/reductase SDR OS=Burkholderia ambifaria (strain ATCC BAA-244 / AMMD) OX=339670 GN=Bamb_0682 PE=3 SV=1 - [Q0BHY2_BURCM]	704.68	59.27	1	8	8	24	248	26.1246	6.53662
Q0BGM2	3-hydroxyacyl-CoA dehydrogenase, NAD-binding protein OS=Burkholderia ambifaria (strain ATCC BAA-244 / AMMD) OX=339670 GN=Bamb_1143 PE=4 SV=1 - [Q0BGM2_BURCM]	698.37	44.92	1	11	11	24	305	32.9871	5.66846
Q0B3Z3	HAD-superfamily hydrolase, subfamily IA, variant 3 OS=Burkholderia ambifaria (strain ATCC BAA-244 / AMMD) OX=339670 GN=Bamb_5583 PE=4 SV=1 - [Q0B3Z3_BURCM]	697.22	69.2	1	10	10	20	224	24.4918	5.33838
Q0BJP1	Adenylate cyclase OS=Burkholderia ambifaria (strain ATCC BAA-244 / AMMD) OX=339670 GN=Bamb_0071 PE=4 SV=1 - [Q0BJP1_BURCM]	691.5	51.98	1	6	6	23	177	19.8711	5.12256
Q0B7G6	Uncharacterized protein OS=Burkholderia ambifaria (strain ATCC BAA-244 / AMMD) OX=339670 GN=Bamb_4355 PE=4 SV=1 - [Q0B7G6_BURCM]	690.53	58.12	1	8	8	28	117	12.7707	6.68311
Q0BB19	Ferredoxin--NADP(+) reductase OS=Burkholderia ambifaria (strain ATCC BAA-244 / AMMD) OX=339670 GN=Bamb_3098 PE=4 SV=1 - [Q0BB19_BURCM]	690.53	60.94	1	13	13	30	256	28.5936	6.16357
Q0B9P8	Extracellular solute-binding protein, family 5 OS=Burkholderia ambifaria (strain ATCC BAA-244 / AMMD) OX=339670 GN=Bamb_3571 PE=4 SV=1 - [Q0B9P8_BURCM]	689.15	39.62	1	15	15	33	520	57.3716	9.18799
Q0BED8	Alkyl hydroperoxide reductase AhpD OS=Burkholderia ambifaria (strain ATCC BAA-244 / AMMD) OX=339670 GN=ahpD PE=3 SV=1 - [Q0BED8_BURCM]	679.7	78.29	1	9	9	30	175	18.7696	6.32861
Q0BI57	YceI family protein OS=Burkholderia ambifaria (strain ATCC BAA-244 / AMMD) OX=339670 GN=Bamb_0607 PE=3 SV=1 - [Q0BI57_BURCM]	673.99	54.36	1	8	8	31	195	21.1918	8.00146
Q0B677	Enoyl-[acyl-carrier-protein] reductase [NADH] OS=Burkholderia ambifaria (strain ATCC BAA-244 / AMMD) OX=339670 GN=fabV PE=3 SV=1 - [FABV_BURCM]	673.15	42.75	1	12	12	26	400	43.3562	5.36377
Q0BG44	Valine--tRNA ligase OS=Burkholderia ambifaria (strain ATCC BAA-244 / AMMD) OX=339670 GN=valS PE=3 SV=1 - [Q0BG44_BURCM]	670.04	26.81	1	16	16	29	955	106.608	5.66846
Q0BDU7	Inositol-1-monophosphatase OS=Burkholderia ambifaria (strain ATCC BAA-244 / AMMD) OX=339670 GN=Bamb_2120 PE=3 SV=1 - [Q0BDU7_BURCM]	669.35	51.31	1	11	11	23	267	29.5141	5.84619
Q0BBE5	Extracellular solute-binding protein, family 5 OS=Burkholderia ambifaria (strain ATCC BAA-244 / AMMD) OX=339670 GN=Bamb_2972 PE=4 SV=1 - [Q0BBE5_BURCM]	666.75	49.72	1	16	16	37	531	57.3976	8.67529
Q0B582	Uncharacterized protein OS=Burkholderia ambifaria (strain ATCC BAA-244 / AMMD) OX=339670 GN=Bamb_5142 PE=4 SV=1 - [Q0B582_BURCM]	661.54	93.64	1	8	8	24	110	11.6291	5.40186
Q0BAT2	DNA topoisomerase III OS=Burkholderia ambifaria (strain ATCC BAA-244 / AMMD) OX=339670 GN=Bamb_3185 PE=4 SV=1 - [Q0BAT2_BURCM]	654.46	21.85	1	14	14	20	865	96.5456	8.30908
Q0BGI8	Phosphate-binding protein PstS OS=Burkholderia ambifaria (strain ATCC BAA-244 / AMMD) OX=339670 GN=Bamb_1177 PE=3 SV=1 - [Q0BGI8_BURCM]	650.86	48.97	1	12	12	23	341	36.0247	8.90967
Q0BIM7	Anthranilate phosphoribosyltransferase OS=Burkholderia ambifaria (strain ATCC BAA-244 / AMMD) OX=339670 GN=trpD PE=3 SV=1 - [TRPD_BURCM]	650.22	51.6	1	10	10	23	343	36.7959	6.40479
Q0BHM5	Protein-L-isoaspartate(D-aspartate) O-methyltransferase OS=Burkholderia ambifaria (strain ATCC BAA-244 / AMMD) OX=339670 GN=Bamb_0789 PE=4 SV=1 - [Q0BHM5_BURCM]	641.63	53.67	1	8	8	20	218	24.1397	6.12549
Q0BHE9	Cold-shock DNA-binding protein family OS=Burkholderia ambifaria (strain ATCC BAA-244 / AMMD) OX=339670 GN=Bamb_0865 PE=4 SV=1 - [Q0BHE9_BURCM]	640.48	43.28	1	1	2	25	67	7.43374	7.25439
Q0BH57	Uncharacterized protein OS=Burkholderia ambifaria (strain ATCC BAA-244 / AMMD) OX=339670 GN=Bamb_0957 PE=4 SV=1 - [Q0BH57_BURCM]	640.21	53.07	1	16	17	29	456	48.8058	5.97314
Q0B759	Aminotransferase, class V OS=Burkholderia ambifaria (strain ATCC BAA-244 / AMMD) OX=339670 GN=Bamb_4464 PE=3 SV=1 - [Q0B759_BURCM]	636.73	36.72	1	9	9	21	384	41.5431	5.50342
Q0BD86	Uracil phosphoribosyltransferase OS=Burkholderia ambifaria (strain ATCC BAA-244 / AMMD) OX=339670 GN=upp PE=3 SV=1 - [UPP_BURCM]	635.34	71.76	1	9	10	24	216	23.9138	7.29834
Q0BDC5	30S ribosomal protein S15 OS=Burkholderia ambifaria (strain ATCC BAA-244 / AMMD) OX=339670 GN=rpsO PE=3 SV=1 - [RS15_BURCM]	634.32	41.57	1	4	4	14	89	10.1196	10.5649
Q0BAN0	AMP nucleosidase OS=Burkholderia ambifaria (strain ATCC BAA-244 / AMMD) OX=339670 GN=amn PE=3 SV=1 - [Q0BAN0_BURCM]	629.11	31.69	1	11	11	22	508	57.6094	7.04932
Q0BBH6	UPF0250 protein Bamb_2941 OS=Burkholderia ambifaria (strain ATCC BAA-244 / AMMD) OX=339670 GN=Bamb_2941 PE=3 SV=1 - [Q0BBH6_BURCM]	628.04	72.55	1	7	7	17	102	11.3829	5.47803
Q0BG53	Methylmalonate-semialdehyde dehydrogenase (Acylating) OS=Burkholderia ambifaria (strain ATCC BAA-244 / AMMD) OX=339670 GN=Bamb_1312 PE=4 SV=1 - [Q0BG53_BURCM]	628.02	41.5	1	13	13	24	506	54.0555	6.0874
Q0BAM3	Carboxymethylenebutenolidase OS=Burkholderia ambifaria (strain ATCC BAA-244 / AMMD) OX=339670 GN=Bamb_3245 PE=4 SV=1 - [Q0BAM3_BURCM]	627.99	48.45	1	10	10	23	291	31.9433	6.69775
Q0BJ01	3-dehydroquinate synthase OS=Burkholderia ambifaria (strain ATCC BAA-244 / AMMD) OX=339670 GN=aroB PE=3 SV=1 - [AROB_BURCM]	627.07	47.63	1	11	11	22	359	37.8868	6.01123
Q0BD88	Methylglyoxal synthase OS=Burkholderia ambifaria (strain ATCC BAA-244 / AMMD) OX=339670 GN=mgsA PE=3 SV=1 - [MGSA_BURCM]	623.11	71.54	1	8	8	20	130	13.8402	5.80811
Q0BHF7	Ribonuclease PH OS=Burkholderia ambifaria (strain ATCC BAA-244 / AMMD) OX=339670 GN=rph PE=3 SV=1 - [RNPH_BURCM]	620.04	54.47	1	8	8	20	246	26.2695	6.55127
Q0BJ20	DNA-directed RNA polymerase subunit alpha OS=Burkholderia ambifaria (strain ATCC BAA-244 / AMMD) OX=339670 GN=rpoA PE=3 SV=1 - [RPOA_BURCM]	611.97	46.15	1	12	12	29	325	35.675	6.07471
Q0B3R1	Dyp-type peroxidase family OS=Burkholderia ambifaria (strain ATCC BAA-244 / AMMD) OX=339670 GN=Bamb_5665 PE=4 SV=1 - [Q0B3R1_BURCM]	606.47	35.96	1	8	8	19	356	38.259	4.93213
Q0BAV6	Uncharacterized protein OS=Burkholderia ambifaria (strain ATCC BAA-244 / AMMD) OX=339670 GN=Bamb_3161 PE=4 SV=1 - [Q0BAV6_BURCM]	603.78	47.67	1	10	10	27	279	31.9695	7.28369
Q0B4T1	PEP phosphonomutase OS=Burkholderia ambifaria (strain ATCC BAA-244 / AMMD) OX=339670 GN=Bamb_5295 PE=4 SV=1 - [Q0B4T1_BURCM]	603.77	38.43	1	6	6	18	255	26.7967	5.22412
Q0BG18	Short-chain dehydrogenase/reductase SDR OS=Burkholderia ambifaria (strain ATCC BAA-244 / AMMD) OX=339670 GN=Bamb_1347 PE=4 SV=1 - [Q0BG18_BURCM]	603.08	55.43	1	10	10	22	258	27.6905	7.50342
Q0BI46	Ferritin, Dps family protein OS=Burkholderia ambifaria (strain ATCC BAA-244 / AMMD) OX=339670 GN=Bamb_0618 PE=3 SV=1 - [Q0BI46_BURCM]	601.24	47.53	1	7	7	19	162	18.0803	6.0874
Q0BJA9	Phosphoheptose isomerase OS=Burkholderia ambifaria (strain ATCC BAA-244 / AMMD) OX=339670 GN=Bamb_0203 PE=4 SV=1 - [Q0BJA9_BURCM]	600.64	46.91	1	4	4	11	194	19.67	4.86865
Q0BHH5	Serine--tRNA ligase OS=Burkholderia ambifaria (strain ATCC BAA-244 / AMMD) OX=339670 GN=serS PE=3 SV=1 - [SYS_BURCM]	597.62	52.89	1	15	15	28	433	47.406	5.88428
Q0BJ50	30S ribosomal protein S7 OS=Burkholderia ambifaria (strain ATCC BAA-244 / AMMD) OX=339670 GN=rpsG PE=3 SV=1 - [RS7_BURCM]	594.57	51.92	1	7	7	24	156	17.6584	10.6675
Q0BH15	3-oxoacyl-[acyl-carrier-protein] reductase OS=Burkholderia ambifaria (strain ATCC BAA-244 / AMMD) OX=339670 GN=Bamb_0999 PE=4 SV=1 - [Q0BH15_BURCM]	593.14	59.44	1	8	9	19	249	25.6714	8.68994
Q0B5L5	Universal stress protein OS=Burkholderia ambifaria (strain ATCC BAA-244 / AMMD) OX=339670 GN=Bamb_5009 PE=3 SV=1 - [Q0B5L5_BURCM]	589.28	69.87	1	7	7	19	156	16.5376	6.06201
Q0B1H5	Phenazine biosynthesis protein PhzF family OS=Burkholderia ambifaria (strain ATCC BAA-244 / AMMD) OX=339670 GN=Bamb_6454 PE=4 SV=1 - [Q0B1H5_BURCM]	587.83	60.96	1	9	9	19	292	31.3843	5.36377
Q0BHI7	Glucose-6-phosphate 1-dehydrogenase OS=Burkholderia ambifaria (strain ATCC BAA-244 / AMMD) OX=339670 GN=zwf PE=3 SV=1 - [Q0BHI7_BURCM]	586.65	38.04	1	14	14	25	489	54.5213	6.43018
Q0BDX9	Glutamate--tRNA ligase OS=Burkholderia ambifaria (strain ATCC BAA-244 / AMMD) OX=339670 GN=gltX PE=3 SV=1 - [SYE_BURCM]	582.96	34.33	1	12	12	30	469	51.8887	5.84619
Q0BBR5	Sigma 54 modulation protein / SSU ribosomal protein S30P OS=Burkholderia ambifaria (strain ATCC BAA-244 / AMMD) OX=339670 GN=Bamb_2852 PE=4 SV=1 - [Q0BBR5_BURCM]	582.05	65.55	1	7	7	35	119	13.6413	6.96143
Q0B9T4	2,3-dimethylmalate lyase OS=Burkholderia ambifaria (strain ATCC BAA-244 / AMMD) OX=339670 GN=Bamb_3535 PE=4 SV=1 - [Q0B9T4_BURCM]	580.65	32.26	1	14	14	21	561	61.0922	5.41455
Q0BG02	Phenylalanine--tRNA ligase alpha subunit OS=Burkholderia ambifaria (strain ATCC BAA-244 / AMMD) OX=339670 GN=pheS PE=3 SV=1 - [Q0BG02_BURCM]	579.08	37.68	1	11	11	21	345	38.9967	5.63037
Q0B112	Uncharacterized protein OS=Burkholderia ambifaria (strain ATCC BAA-244 / AMMD) OX=339670 GN=Bamb_6618 PE=4 SV=1 - [Q0B112_BURCM]	578.31	69.84	1	4	4	19	126	13.4787	6.15088
Q0BDB9	2-isopropylmalate synthase OS=Burkholderia ambifaria (strain ATCC BAA-244 / AMMD) OX=339670 GN=leuA PE=3 SV=1 - [LEU1_BURCM]	575.59	31.71	1	12	12	22	514	55.5065	5.80811
Q0BHW3	Homogentisate 1,2-dioxygenase OS=Burkholderia ambifaria (strain ATCC BAA-244 / AMMD) OX=339670 GN=hmgA PE=3 SV=1 - [HGD_BURCM]	574.29	46.62	1	13	13	21	444	49.0013	5.77002
Q0B3L2	Universal stress protein OS=Burkholderia ambifaria (strain ATCC BAA-244 / AMMD) OX=339670 GN=Bamb_5714 PE=3 SV=1 - [Q0B3L2_BURCM]	570.29	54.09	1	7	7	17	159	16.9699	5.94775
Q0B8Z7	Alcohol dehydrogenase GroES domain protein OS=Burkholderia ambifaria (strain ATCC BAA-244 / AMMD) OX=339670 GN=Bamb_3822 PE=3 SV=1 - [Q0B8Z7_BURCM]	569.62	43.06	1	10	11	28	346	37.0511	6.60986
Q0B7P4	Uncharacterized protein OS=Burkholderia ambifaria (strain ATCC BAA-244 / AMMD) OX=339670 GN=Bamb_4276 PE=4 SV=1 - [Q0B7P4_BURCM]	566.19	48.84	1	5	5	14	129	14.4192	8.47021
Q0BJN2	Amino acid/amide ABC transporter substrate-binding protein, HAAT family OS=Burkholderia ambifaria (strain ATCC BAA-244 / AMMD) OX=339670 GN=Bamb_0080 PE=4 SV=1 - [Q0BJN2_BURCM]	564.83	44.16	1	9	9	18	385	40.632	8.6167
Q0B2T5	Carboxymethylenebutenolidase OS=Burkholderia ambifaria (strain ATCC BAA-244 / AMMD) OX=339670 GN=Bamb_5994 PE=4 SV=1 - [Q0B2T5_BURCM]	564.21	67.51	1	10	10	26	237	26.2141	5.42725
Q0BDM6	Uncharacterized protein OS=Burkholderia ambifaria (strain ATCC BAA-244 / AMMD) OX=339670 GN=Bamb_2191 PE=4 SV=1 - [Q0BDM6_BURCM]	560.34	41.34	1	11	11	24	329	35.7379	9.23193
Q0BIH2	Phosphoribosyltransferase OS=Burkholderia ambifaria (strain ATCC BAA-244 / AMMD) OX=339670 GN=Bamb_0492 PE=4 SV=1 - [Q0BIH2_BURCM]	556.84	61.75	1	8	8	24	183	20.4433	5.59229
Q0BAM1	Rieske (2Fe-2S) domain protein OS=Burkholderia ambifaria (strain ATCC BAA-244 / AMMD) OX=339670 GN=Bamb_3247 PE=4 SV=1 - [Q0BAM1_BURCM]	556.61	42.12	1	10	10	19	368	42.5039	5.60498
Q0B1W8	S-(hydroxymethyl)glutathione dehydrogenase OS=Burkholderia ambifaria (strain ATCC BAA-244 / AMMD) OX=339670 GN=Bamb_6311 PE=3 SV=1 - [Q0B1W8_BURCM]	552.91	51.22	1	10	10	19	369	38.7967	6.66846
Q0BJL4	ATP synthase epsilon chain OS=Burkholderia ambifaria (strain ATCC BAA-244 / AMMD) OX=339670 GN=atpC PE=3 SV=1 - [ATPE_BURCM]	552.36	51.77	1	6	6	16	141	14.976	5.18604
Q0BEN9	Hydrolase, TatD family OS=Burkholderia ambifaria (strain ATCC BAA-244 / AMMD) OX=339670 GN=Bamb_1828 PE=4 SV=1 - [Q0BEN9_BURCM]	552.26	37.69	1	7	7	17	260	29.0187	5.93506
Q0B417	Peptidyl-prolyl cis-trans isomerase OS=Burkholderia ambifaria (strain ATCC BAA-244 / AMMD) OX=339670 GN=Bamb_5559 PE=3 SV=1 - [Q0B417_BURCM]	552.11	71.68	1	7	7	27	113	11.843	4.93213
Q0BHJ5	Uncharacterized protein OS=Burkholderia ambifaria (strain ATCC BAA-244 / AMMD) OX=339670 GN=Bamb_0819 PE=4 SV=1 - [Q0BHJ5_BURCM]	551.64	61.05	1	8	8	21	172	19.0769	6.52197
Q0BFX4	Dihydrolipoyllysine-residue succinyltransferase component of 2-oxoglutarate dehydrogenase complex OS=Burkholderia ambifaria (strain ATCC BAA-244 / AMMD) OX=339670 GN=Bamb_1391 PE=3 SV=1 - [Q0BFX4_BURCM]	551.02	38.12	1	10	10	20	425	44.2865	5.99854
Q0BEP9	Peptidoglycan-binding LysM OS=Burkholderia ambifaria (strain ATCC BAA-244 / AMMD) OX=339670 GN=Bamb_1818 PE=4 SV=1 - [Q0BEP9_BURCM]	547.77	59.62	1	6	6	17	156	16.3482	4.729
Q0BJK9	Bifunctional protein PutA OS=Burkholderia ambifaria (strain ATCC BAA-244 / AMMD) OX=339670 GN=Bamb_0103 PE=3 SV=1 - [Q0BJK9_BURCM]	546.81	16.11	1	12	13	25	1310	140.182	6.25244
Q0BIQ8	Nitroreductase OS=Burkholderia ambifaria (strain ATCC BAA-244 / AMMD) OX=339670 GN=Bamb_0406 PE=4 SV=1 - [Q0BIQ8_BURCM]	545.39	72.14	1	7	7	24	201	21.6112	7.21045
Q0BD30	Aminotransferase, class I and II OS=Burkholderia ambifaria (strain ATCC BAA-244 / AMMD) OX=339670 GN=Bamb_2387 PE=4 SV=1 - [Q0BD30_BURCM]	545.17	47.33	1	11	11	23	393	43.4928	6.39209
Q0BBY5	Import inner membrane translocase, subunit Tim44 OS=Burkholderia ambifaria (strain ATCC BAA-244 / AMMD) OX=339670 GN=Bamb_2782 PE=4 SV=1 - [Q0BBY5_BURCM]	543.55	24.13	1	5	5	15	344	35.9792	9.68604
Q0B4B3	Amino acid ABC transporter substrate-binding protein, PAAT family OS=Burkholderia ambifaria (strain ATCC BAA-244 / AMMD) OX=339670 GN=Bamb_5463 PE=3 SV=1 - [Q0B4B3_BURCM]	542.06	40.08	1	2	9	21	257	27.7753	8.1626
Q0B6F6	Beta-ketoadipyl CoA thiolase OS=Burkholderia ambifaria (strain ATCC BAA-244 / AMMD) OX=339670 GN=Bamb_4717 PE=3 SV=1 - [Q0B6F6_BURCM]	536.9	42.12	1	6	11	20	406	42.4578	6.58057
Q0BD59	Formate-dependent phosphoribosylglycinamide formyltransferase OS=Burkholderia ambifaria (strain ATCC BAA-244 / AMMD) OX=339670 GN=purT PE=3 SV=1 - [PURT_BURCM]	536.67	41.83	1	12	12	22	404	42.9834	5.85889
Q0BGU4	Redoxin domain protein OS=Burkholderia ambifaria (strain ATCC BAA-244 / AMMD) OX=339670 GN=Bamb_1070 PE=4 SV=1 - [Q0BGU4_BURCM]	534.88	46.45	1	7	7	18	183	19.5462	8.646
Q0BHS4	Aspartate carbamoyltransferase OS=Burkholderia ambifaria (strain ATCC BAA-244 / AMMD) OX=339670 GN=pyrB PE=3 SV=1 - [PYRB_BURCM]	534.87	41.11	1	10	10	21	343	37.2535	8.63135
Q0BHI6	Carbohydrate ABC transporter substrate-binding protein, CUT1 family OS=Burkholderia ambifaria (strain ATCC BAA-244 / AMMD) OX=339670 GN=Bamb_0828 PE=4 SV=1 - [Q0BHI6_BURCM]	534.65	33.49	1	8	8	18	415	44.1516	8.95361
Q0BBX5	Amino acid aldolase or racemase-like protein OS=Burkholderia ambifaria (strain ATCC BAA-244 / AMMD) OX=339670 GN=Bamb_2792 PE=4 SV=1 - [Q0BBX5_BURCM]	534.52	35.45	1	10	10	20	426	46.499	5.74463
Q0BAF3	Uncharacterized protein OS=Burkholderia ambifaria (strain ATCC BAA-244 / AMMD) OX=339670 GN=Bamb_3315 PE=4 SV=1 - [Q0BAF3_BURCM]	533.61	62.22	1	4	4	13	90	10.6504	5.30029
Q0BC36	Glycerol kinase OS=Burkholderia ambifaria (strain ATCC BAA-244 / AMMD) OX=339670 GN=glpK PE=3 SV=1 - [GLPK_BURCM]	533.1	38.8	1	12	12	21	500	54.6147	5.75732
Q0BJI0	Glycine cleavage system H protein OS=Burkholderia ambifaria (strain ATCC BAA-244 / AMMD) OX=339670 GN=gcvH PE=3 SV=1 - [Q0BJI0_BURCM]	532.58	32.68	1	3	3	33	153	16.1161	4.55127
Q0BIX1	ATP phosphoribosyltransferase OS=Burkholderia ambifaria (strain ATCC BAA-244 / AMMD) OX=339670 GN=hisG PE=3 SV=1 - [HIS1_BURCM]	528.93	54.84	1	7	7	18	217	23.0914	6.80029
Q0BDP4	Acetyltransferase component of pyruvate dehydrogenase complex OS=Burkholderia ambifaria (strain ATCC BAA-244 / AMMD) OX=339670 GN=Bamb_2173 PE=3 SV=1 - [Q0BDP4_BURCM]	528.19	31.58	2	12	12	26	551	56.4389	6.37939
Q0BDV4	Cysteine--tRNA ligase OS=Burkholderia ambifaria (strain ATCC BAA-244 / AMMD) OX=339670 GN=cysS PE=3 SV=1 - [SYC_BURCM]	527.86	36.34	1	10	10	26	465	52.0422	5.97314
Q0B3F5	Acetyl-CoA acetyltransferase / 3-ketoacyl-CoA thiolase OS=Burkholderia ambifaria (strain ATCC BAA-244 / AMMD) OX=339670 GN=Bamb_5771 PE=3 SV=1 - [Q0B3F5_BURCM]	527.7	53.65	1	13	13	27	397	40.9741	6.85889
Q0BBT0	Single-stranded DNA-binding protein OS=Burkholderia ambifaria (strain ATCC BAA-244 / AMMD) OX=339670 GN=Bamb_2837 PE=3 SV=1 - [Q0BBT0_BURCM]	527.13	50.8	1	7	7	15	187	19.0021	5.70654
Q0B657	L-threonine aldolase OS=Burkholderia ambifaria (strain ATCC BAA-244 / AMMD) OX=339670 GN=Bamb_4817 PE=4 SV=1 - [Q0B657_BURCM]	526.87	50.74	1	9	9	20	337	35.7503	6.60986
Q0B5S7	Toluene tolerance family protein OS=Burkholderia ambifaria (strain ATCC BAA-244 / AMMD) OX=339670 GN=Bamb_4947 PE=4 SV=1 - [Q0B5S7_BURCM]	523.33	51.39	1	8	8	17	216	23.4629	9.34912
Q0BD83	Oxygen-dependent coproporphyrinogen-III oxidase OS=Burkholderia ambifaria (strain ATCC BAA-244 / AMMD) OX=339670 GN=hemF PE=3 SV=1 - [HEM6_BURCM]	523.01	52.29	1	11	11	19	306	34.4391	5.74463
Q0BAI0	Peptidase M23B OS=Burkholderia ambifaria (strain ATCC BAA-244 / AMMD) OX=339670 GN=Bamb_3288 PE=4 SV=1 - [Q0BAI0_BURCM]	522.24	43.62	1	9	9	20	243	25.1288	9.48096
Q0BEF8	Lon protease OS=Burkholderia ambifaria (strain ATCC BAA-244 / AMMD) OX=339670 GN=lon PE=2 SV=1 - [Q0BEF8_BURCM]	522.08	21.81	1	13	14	23	807	89.1665	6.44287
Q0BAB8	Tryptophan synthase alpha chain OS=Burkholderia ambifaria (strain ATCC BAA-244 / AMMD) OX=339670 GN=trpA PE=3 SV=1 - [Q0BAB8_BURCM]	518.75	31.62	1	6	6	13	272	28.2078	5.05908
Q0BAC0	Tryptophan synthase beta chain OS=Burkholderia ambifaria (strain ATCC BAA-244 / AMMD) OX=339670 GN=trpB PE=3 SV=1 - [Q0BAC0_BURCM]	516.65	36.02	1	11	11	21	397	43.1197	6.23975
Q0BJ69	Uncharacterized protein OS=Burkholderia ambifaria (strain ATCC BAA-244 / AMMD) OX=339670 GN=Bamb_0244 PE=4 SV=1 - [Q0BJ69_BURCM]	516.6	55.35	1	9	9	18	271	29.4183	7.04932
Q0BD34	Chaperone protein HtpG OS=Burkholderia ambifaria (strain ATCC BAA-244 / AMMD) OX=339670 GN=htpG PE=3 SV=1 - [HTPG_BURCM]	515.8	29.11	1	12	12	21	632	71.1381	5.2876
Q0BDS2	2-dehydro-3-deoxyphosphooctonate aldolase OS=Burkholderia ambifaria (strain ATCC BAA-244 / AMMD) OX=339670 GN=kdsA PE=3 SV=1 - [Q0BDS2_BURCM]	515.44	55.63	1	10	10	24	284	30.9086	6.0874
Q0BEZ6	PfkB domain protein OS=Burkholderia ambifaria (strain ATCC BAA-244 / AMMD) OX=339670 GN=Bamb_1721 PE=4 SV=1 - [Q0BEZ6_BURCM]	514.63	53.57	1	8	8	19	308	32.2141	5.46533
Q0BEF6	ATP-dependent Clp protease proteolytic subunit OS=Burkholderia ambifaria (strain ATCC BAA-244 / AMMD) OX=339670 GN=clpP PE=3 SV=1 - [CLPP_BURCM]	514.02	35.02	1	8	8	22	217	23.7352	5.2876
Q0B629	Glyoxalase/bleomycin resistance protein/dioxygenase OS=Burkholderia ambifaria (strain ATCC BAA-244 / AMMD) OX=339670 GN=Bamb_4845 PE=4 SV=1 - [Q0B629_BURCM]	511.83	64.57	1	6	6	15	127	13.8307	5.66846
Q0BJ46	50S ribosomal protein L3 OS=Burkholderia ambifaria (strain ATCC BAA-244 / AMMD) OX=339670 GN=rplC PE=3 SV=1 - [RL3_BURCM]	511.58	51.61	1	8	8	16	217	22.6842	10.0669
Q0BBR8	Lipopolysaccharide export system protein LptA OS=Burkholderia ambifaria (strain ATCC BAA-244 / AMMD) OX=339670 GN=lptA PE=3 SV=1 - [Q0BBR8_BURCM]	510.47	60.63	1	9	9	15	221	23.288	8.79248
Q0BIA8	2-keto-3-deoxy-phosphogluconate aldolase OS=Burkholderia ambifaria (strain ATCC BAA-244 / AMMD) OX=339670 GN=Bamb_0556 PE=4 SV=1 - [Q0BIA8_BURCM]	508.44	63.46	1	8	8	15	208	21.8307	7.92822
Q0BEV5	L-carnitine dehydratase/bile acid-inducible protein F OS=Burkholderia ambifaria (strain ATCC BAA-244 / AMMD) OX=339670 GN=Bamb_1762 PE=4 SV=1 - [Q0BEV5_BURCM]	506.01	40.9	1	11	11	21	401	42.8492	5.77002
Q0B6Y8	Substrate-binding region of ABC-type glycine betaine transport system OS=Burkholderia ambifaria (strain ATCC BAA-244 / AMMD) OX=339670 GN=Bamb_4535 PE=4 SV=1 - [Q0B6Y8_BURCM]	503.62	50.65	1	8	8	20	306	31.904	9.12939
Q0BE03	Succinyl-diaminopimelate desuccinylase OS=Burkholderia ambifaria (strain ATCC BAA-244 / AMMD) OX=339670 GN=dapE PE=3 SV=1 - [DAPE_BURCM]	503.03	54.62	1	12	12	17	379	40.6688	6.04932
Q0BI44	Pyrroline-5-carboxylate reductase OS=Burkholderia ambifaria (strain ATCC BAA-244 / AMMD) OX=339670 GN=proC PE=3 SV=1 - [Q0BI44_BURCM]	498.51	45.56	1	8	8	17	270	27.5125	5.31299
Q0BJ35	50S ribosomal protein L24 OS=Burkholderia ambifaria (strain ATCC BAA-244 / AMMD) OX=339670 GN=rplX PE=3 SV=1 - [RL24_BURCM]	493.53	47.06	1	4	4	16	102	10.702	10.1694
Q0BH38	Nicotinate phosphoribosyltransferase OS=Burkholderia ambifaria (strain ATCC BAA-244 / AMMD) OX=339670 GN=pncB PE=3 SV=1 - [PNCB_BURCM]	493.24	41.1	1	11	11	25	399	46.0811	6.31592
Q0B5R4	NADPH-dependent FMN reductase OS=Burkholderia ambifaria (strain ATCC BAA-244 / AMMD) OX=339670 GN=Bamb_4960 PE=4 SV=1 - [Q0B5R4_BURCM]	493.19	62.5	1	9	9	21	184	20.3635	6.96143
Q0BH93	3-phosphoshikimate 1-carboxyvinyltransferase OS=Burkholderia ambifaria (strain ATCC BAA-244 / AMMD) OX=339670 GN=aroA PE=3 SV=1 - [AROA_BURCM]	490.9	41.94	1	12	12	19	434	46.3349	6.01123
Q0BJQ3	Putative glutamate--cysteine ligase 2 OS=Burkholderia ambifaria (strain ATCC BAA-244 / AMMD) OX=339670 GN=Bamb_0059 PE=3 SV=1 - [GCS2_BURCM]	486.95	24.26	1	7	7	14	371	41.7409	5.65576
Q0BCB9	Periplasmic solute binding protein OS=Burkholderia ambifaria (strain ATCC BAA-244 / AMMD) OX=339670 GN=Bamb_2648 PE=3 SV=1 - [Q0BCB9_BURCM]	485.73	55.26	1	9	9	19	304	32.3788	9.46631
Q0BEX9	Phosphoribosyltransferase OS=Burkholderia ambifaria (strain ATCC BAA-244 / AMMD) OX=339670 GN=Bamb_1738 PE=4 SV=1 - [Q0BEX9_BURCM]	484.33	36.87	1	4	4	10	198	22.4324	6.29053
Q0BEV1	Thioredoxin OS=Burkholderia ambifaria (strain ATCC BAA-244 / AMMD) OX=339670 GN=Bamb_1766 PE=3 SV=1 - [Q0BEV1_BURCM]	483.38	68.52	1	6	6	17	108	11.7511	5.90967
Q0BIL8	Enoyl-CoA hydratase OS=Burkholderia ambifaria (strain ATCC BAA-244 / AMMD) OX=339670 GN=Bamb_0446 PE=3 SV=1 - [Q0BIL8_BURCM]	482.15	54.37	1	9	9	13	263	28.1996	5.50342
Q0B5Q1	L-threonine 3-dehydrogenase OS=Burkholderia ambifaria (strain ATCC BAA-244 / AMMD) OX=339670 GN=tdh PE=3 SV=1 - [TDH_BURCM]	482.02	47.95	1	12	12	30	342	37.349	6.65381
Q0BCW8	Amino acid ABC transporter substrate-binding protein, PAAT family OS=Burkholderia ambifaria (strain ATCC BAA-244 / AMMD) OX=339670 GN=Bamb_2449 PE=3 SV=1 - [Q0BCW8_BURCM]	481.01	55.04	1	9	9	19	258	28.2266	8.42627
Q0BGU9	N-succinylarginine dihydrolase OS=Burkholderia ambifaria (strain ATCC BAA-244 / AMMD) OX=339670 GN=astB PE=3 SV=1 - [ASTB_BURCM]	478.88	38.12	1	9	9	15	446	48.3004	5.96045
Q0BCT4	OmpA/MotB domain protein OS=Burkholderia ambifaria (strain ATCC BAA-244 / AMMD) OX=339670 GN=Bamb_2483 PE=3 SV=1 - [Q0BCT4_BURCM]	478.53	33.19	1	4	4	19	232	23.509	9.42236
Q0B641	N-acylglucosamine 2-epimerase OS=Burkholderia ambifaria (strain ATCC BAA-244 / AMMD) OX=339670 GN=Bamb_4833 PE=4 SV=1 - [Q0B641_BURCM]	477.8	45.18	1	10	10	18	394	42.2098	6.3667
Q0BDN0	Rhodanese domain protein OS=Burkholderia ambifaria (strain ATCC BAA-244 / AMMD) OX=339670 GN=Bamb_2187 PE=4 SV=1 - [Q0BDN0_BURCM]	477.08	57.14	1	6	6	17	182	20.0334	8.93896
Q0BJI4	Thiamine pyrophosphate enzyme domain protein TPP-binding protein OS=Burkholderia ambifaria (strain ATCC BAA-244 / AMMD) OX=339670 GN=Bamb_0128 PE=3 SV=1 - [Q0BJI4_BURCM]	475.58	37.39	1	12	12	18	567	60.9371	6.93213
Q0B820	NADH:flavin oxidoreductase/NADH oxidase OS=Burkholderia ambifaria (strain ATCC BAA-244 / AMMD) OX=339670 GN=Bamb_4150 PE=4 SV=1 - [Q0B820_BURCM]	475.44	26.91	1	7	7	17	353	37.8273	5.5542
Q0BIV1	Glutathione S-transferase, N-terminal domain protein OS=Burkholderia ambifaria (strain ATCC BAA-244 / AMMD) OX=339670 GN=Bamb_0362 PE=4 SV=1 - [Q0BIV1_BURCM]	473.76	52.71	1	9	9	21	203	23.6943	6.93213
Q0BBZ5	3-hydroxyacyl-CoA dehydrogenase OS=Burkholderia ambifaria (strain ATCC BAA-244 / AMMD) OX=339670 GN=Bamb_2772 PE=4 SV=1 - [Q0BBZ5_BURCM]	469.58	27.5	1	15	15	25	811	87.4578	6.97607
Q0B567	Pyruvate dehydrogenase (Cytochrome) OS=Burkholderia ambifaria (strain ATCC BAA-244 / AMMD) OX=339670 GN=Bamb_5157 PE=3 SV=1 - [Q0B567_BURCM]	469.51	43.8	1	13	14	27	573	61.1373	6.45557
Q0B615	Uncharacterized protein OS=Burkholderia ambifaria (strain ATCC BAA-244 / AMMD) OX=339670 GN=Bamb_4859 PE=4 SV=1 - [Q0B615_BURCM]	469	68.54	1	4	4	14	89	9.58592	6.15088
Q0BG29	Flavodoxin/nitric oxide synthase OS=Burkholderia ambifaria (strain ATCC BAA-244 / AMMD) OX=339670 GN=Bamb_1336 PE=3 SV=1 - [Q0BG29_BURCM]	468.71	49.51	1	6	6	15	206	21.0947	6.52197
Q0BD55	Glycoside hydrolase 15-related protein OS=Burkholderia ambifaria (strain ATCC BAA-244 / AMMD) OX=339670 GN=Bamb_2362 PE=4 SV=1 - [Q0BD55_BURCM]	468.3	32.24	1	14	14	21	611	67.9602	5.73193
Q0BAL3	GatB/Yqey domain protein OS=Burkholderia ambifaria (strain ATCC BAA-244 / AMMD) OX=339670 GN=Bamb_3255 PE=4 SV=1 - [Q0BAL3_BURCM]	467.51	66.89	1	7	7	16	148	15.6052	5.70654
Q0BED1	Phage shock protein A, PspA OS=Burkholderia ambifaria (strain ATCC BAA-244 / AMMD) OX=339670 GN=Bamb_1936 PE=4 SV=1 - [Q0BED1_BURCM]	466.22	34.96	1	6	6	13	226	24.3176	5.35107
Q0B4X6	Amino acid/amide ABC transporter substrate-binding protein, HAAT family OS=Burkholderia ambifaria (strain ATCC BAA-244 / AMMD) OX=339670 GN=Bamb_5249 PE=4 SV=1 - [Q0B4X6_BURCM]	466.08	39.95	1	9	9	16	383	40.1477	9.31982
Q0BE25	UDP-3-O-acylglucosamine N-acyltransferase OS=Burkholderia ambifaria (strain ATCC BAA-244 / AMMD) OX=339670 GN=lpxD PE=3 SV=1 - [LPXD_BURCM]	465.76	39.56	1	9	9	15	364	37.1802	6.60986
Q0BEW2	23S rRNA (uracil(1939)-C(5))-methyltransferase RlmD OS=Burkholderia ambifaria (strain ATCC BAA-244 / AMMD) OX=339670 GN=rlmD PE=3 SV=2 - [RLMD_BURCM]	462.72	30.54	1	9	9	19	465	50.9696	8.33838
Q0BHS5	Phosphoribosyltransferase OS=Burkholderia ambifaria (strain ATCC BAA-244 / AMMD) OX=339670 GN=Bamb_0739 PE=4 SV=1 - [Q0BHS5_BURCM]	460.74	42.11	1	6	6	16	171	18.0695	5.36377
Q0BCY5	Proteinase inhibitor I11, ecotin OS=Burkholderia ambifaria (strain ATCC BAA-244 / AMMD) OX=339670 GN=Bamb_2432 PE=4 SV=1 - [Q0BCY5_BURCM]	459.04	46.99	1	5	5	14	166	18.0321	8.1626
Q0BFU2	Monosaccharide ABC transporter substrate-binding protein, CUT2 family OS=Burkholderia ambifaria (strain ATCC BAA-244 / AMMD) OX=339670 GN=Bamb_1423 PE=4 SV=1 - [Q0BFU2_BURCM]	458.41	48.41	1	9	9	17	314	32.7991	9.12939
Q0BIG4	Uncharacterized protein OS=Burkholderia ambifaria (strain ATCC BAA-244 / AMMD) OX=339670 GN=Bamb_0500 PE=4 SV=1 - [Q0BIG4_BURCM]	456.46	16.36	1	2	2	10	220	21.3673	12.0884
Q0BGG2	Aldose 1-epimerase OS=Burkholderia ambifaria (strain ATCC BAA-244 / AMMD) OX=339670 GN=Bamb_1203 PE=4 SV=1 - [Q0BGG2_BURCM]	455.67	44.38	1	9	9	20	320	35.608	6.58057
Q0BC46	Cytochrome c, class I OS=Burkholderia ambifaria (strain ATCC BAA-244 / AMMD) OX=339670 GN=Bamb_2721 PE=4 SV=1 - [Q0BC46_BURCM]	454.99	28.82	1	4	4	16	229	24.5442	8.25049
Q0BI90	30S ribosomal protein S9 OS=Burkholderia ambifaria (strain ATCC BAA-244 / AMMD) OX=339670 GN=rpsI PE=3 SV=1 - [RS9_BURCM]	454.2	57.69	1	6	6	19	130	14.3087	10.814
Q0BDF7	Peptidase M14, carboxypeptidase A OS=Burkholderia ambifaria (strain ATCC BAA-244 / AMMD) OX=339670 GN=Bamb_2260 PE=4 SV=1 - [Q0BDF7_BURCM]	451.89	50	1	15	15	26	384	42.919	5.19873
Q0BHD7	Fructose-1,6-bisphosphatase class 1 OS=Burkholderia ambifaria (strain ATCC BAA-244 / AMMD) OX=339670 GN=fbp PE=3 SV=1 - [F16PA_BURCM]	451.56	44.25	1	12	12	25	339	37.2597	5.23682
Q0B7B3	Uncharacterized protein OS=Burkholderia ambifaria (strain ATCC BAA-244 / AMMD) OX=339670 GN=Bamb_4408 PE=4 SV=1 - [Q0B7B3_BURCM]	451.05	63.51	1	5	5	16	148	15.6649	8.03076
Q0BCM1	4-hydroxy-3-methylbut-2-enyl diphosphate reductase OS=Burkholderia ambifaria (strain ATCC BAA-244 / AMMD) OX=339670 GN=ispH PE=3 SV=1 - [Q0BCM1_BURCM]	450.67	51.23	1	11	11	22	326	35.2945	6.03662
Q0BCP4	Uncharacterized conserved protein UCP030820 OS=Burkholderia ambifaria (strain ATCC BAA-244 / AMMD) OX=339670 GN=Bamb_2523 PE=4 SV=1 - [Q0BCP4_BURCM]	450.61	38.04	1	7	7	16	184	20.0274	5.2876
Q0BJ27	50S ribosomal protein L15 OS=Burkholderia ambifaria (strain ATCC BAA-244 / AMMD) OX=339670 GN=rplO PE=3 SV=1 - [RL15_BURCM]	449.75	43.06	1	6	6	19	144	15.0564	10.5942
Q0B5D4	Uncharacterized protein OS=Burkholderia ambifaria (strain ATCC BAA-244 / AMMD) OX=339670 GN=Bamb_5090 PE=4 SV=1 - [Q0B5D4_BURCM]	449.65	67.36	1	6	6	13	144	15.6799	5.13525
Q0BBR4	Putative PTS IIA-like nitrogen-regulatory protein PtsN OS=Burkholderia ambifaria (strain ATCC BAA-244 / AMMD) OX=339670 GN=Bamb_2853 PE=4 SV=1 - [Q0BBR4_BURCM]	449.46	44.13	1	6	6	18	179	19.6494	6.69775
Q0BHH8	Outer-membrane lipoprotein carrier protein OS=Burkholderia ambifaria (strain ATCC BAA-244 / AMMD) OX=339670 GN=lolA PE=3 SV=1 - [Q0BHH8_BURCM]	448.33	33.62	1	7	7	19	229	24.8708	9.5542
Q0B593	Cupin 2, conserved barrel domain protein OS=Burkholderia ambifaria (strain ATCC BAA-244 / AMMD) OX=339670 GN=Bamb_5131 PE=4 SV=1 - [Q0B593_BURCM]	448.06	73.55	1	6	6	12	155	17.1198	6.18896
Q0BH69	30S ribosomal protein S16 OS=Burkholderia ambifaria (strain ATCC BAA-244 / AMMD) OX=339670 GN=rpsP PE=3 SV=1 - [RS16_BURCM]	447.86	47.62	1	4	4	13	84	9.46914	11.1948
Q0BFP1	Uncharacterized protein OS=Burkholderia ambifaria (strain ATCC BAA-244 / AMMD) OX=339670 GN=Bamb_1474 PE=4 SV=1 - [Q0BFP1_BURCM]	447.33	57.09	1	9	9	17	247	27.7072	4.53857
Q0BG45	UTP--glucose-1-phosphate uridylyltransferase OS=Burkholderia ambifaria (strain ATCC BAA-244 / AMMD) OX=339670 GN=Bamb_1320 PE=3 SV=1 - [Q0BG45_BURCM]	447.12	50	3	9	9	19	294	32.2038	6.01123
Q0B902	UspA domain protein OS=Burkholderia ambifaria (strain ATCC BAA-244 / AMMD) OX=339670 GN=Bamb_3817 PE=4 SV=1 - [Q0B902_BURCM]	444.7	40.5	1	9	9	18	279	30.5864	6.53662
Q0B115	Conjugal transfer protein OS=Burkholderia ambifaria (strain ATCC BAA-244 / AMMD) OX=339670 GN=Bamb_6615 PE=4 SV=1 - [Q0B115_BURCM]	443.58	51.16	1	4	4	15	129	13.5924	4.03076
Q0BAC6	3-isopropylmalate dehydratase small subunit OS=Burkholderia ambifaria (strain ATCC BAA-244 / AMMD) OX=339670 GN=leuD PE=3 SV=1 - [LEUD_BURCM]	441.49	42.13	1	7	7	17	216	24.6285	7.02002
Q0BH77	Lipoprotein, YaeC family OS=Burkholderia ambifaria (strain ATCC BAA-244 / AMMD) OX=339670 GN=Bamb_0937 PE=4 SV=1 - [Q0BH77_BURCM]	441.46	46.59	1	7	9	18	264	28.2752	9.48096
Q0BH19	50S ribosomal protein L32 OS=Burkholderia ambifaria (strain ATCC BAA-244 / AMMD) OX=339670 GN=rpmF PE=3 SV=1 - [RL32_BURCM]	439.68	54.24	1	2	2	13	59	6.64846	10.2866
Q0BGK1	Hydroxyacylglutathione hydrolase OS=Burkholderia ambifaria (strain ATCC BAA-244 / AMMD) OX=339670 GN=gloB PE=3 SV=1 - [Q0BGK1_BURCM]	439.4	36.54	1	6	6	13	260	27.817	6.12549
Q0B7F9	Uncharacterized protein OS=Burkholderia ambifaria (strain ATCC BAA-244 / AMMD) OX=339670 GN=Bamb_4362 PE=4 SV=1 - [Q0B7F9_BURCM]	438.7	54.22	1	4	4	17	83	8.95852	5.021
Q0B8F8	Extracellular solute-binding protein, family 5 OS=Burkholderia ambifaria (strain ATCC BAA-244 / AMMD) OX=339670 GN=Bamb_4012 PE=4 SV=1 - [Q0B8F8_BURCM]	438.39	24.95	1	8	8	12	529	58.2414	9.0415
Q0BCF1	Pyridoxine/pyridoxamine 5'-phosphate oxidase OS=Burkholderia ambifaria (strain ATCC BAA-244 / AMMD) OX=339670 GN=pdxH PE=3 SV=1 - [PDXH_BURCM]	437.08	20.56	1	3	3	10	214	24.2604	6.62451
Q0B9T5	Thiamine pyrophosphate enzyme domain protein TPP-binding protein OS=Burkholderia ambifaria (strain ATCC BAA-244 / AMMD) OX=339670 GN=Bamb_3534 PE=4 SV=1 - [Q0B9T5_BURCM]	436.86	18.07	1	5	5	13	393	41.3068	5.85889
Q0BHX1	Peroxidase OS=Burkholderia ambifaria (strain ATCC BAA-244 / AMMD) OX=339670 GN=Bamb_0693 PE=4 SV=1 - [Q0BHX1_BURCM]	436.06	54.72	1	10	10	19	212	23.9274	5.92236
Q0BG26	Putative transcriptional regulator, XRE family OS=Burkholderia ambifaria (strain ATCC BAA-244 / AMMD) OX=339670 GN=Bamb_1339 PE=4 SV=1 - [Q0BG26_BURCM]	434.81	46.36	1	5	5	12	151	17.1848	5.87158
Q0BAF4	Succinate dehydrogenase iron-sulfur subunit OS=Burkholderia ambifaria (strain ATCC BAA-244 / AMMD) OX=339670 GN=Bamb_3314 PE=3 SV=1 - [Q0BAF4_BURCM]	431.28	35.62	1	7	7	13	233	26.5643	6.53662
Q0BCS8	Pantothenate synthetase OS=Burkholderia ambifaria (strain ATCC BAA-244 / AMMD) OX=339670 GN=panC PE=3 SV=1 - [PANC_BURCM]	429.48	37.63	1	8	8	16	279	31.3444	6.27783
Q0B3J9	Aldose 1-epimerase OS=Burkholderia ambifaria (strain ATCC BAA-244 / AMMD) OX=339670 GN=Bamb_5727 PE=3 SV=1 - [Q0B3J9_BURCM]	429.42	34.1	1	7	7	13	390	41.7221	6.96143
Q0BJ58	50S ribosomal protein L11 OS=Burkholderia ambifaria (strain ATCC BAA-244 / AMMD) OX=339670 GN=rplK PE=3 SV=1 - [RL11_BURCM]	429	26.57	1	4	4	13	143	14.892	9.83252
Q0BH17	3-oxoacyl-[acyl-carrier-protein] synthase 3 OS=Burkholderia ambifaria (strain ATCC BAA-244 / AMMD) OX=339670 GN=fabH PE=3 SV=1 - [Q0BH17_BURCM]	424.2	39.51	1	9	9	19	329	35.002	6.16357
Q0BHJ8	Transcription antitermination protein NusB OS=Burkholderia ambifaria (strain ATCC BAA-244 / AMMD) OX=339670 GN=nusB PE=3 SV=1 - [NUSB_BURCM]	424.2	58.62	1	6	6	14	145	16.0056	7.57666
Q0B6T8	3-methylcrotonoyl-CoA carboxylase, alpha subunit OS=Burkholderia ambifaria (strain ATCC BAA-244 / AMMD) OX=339670 GN=Bamb_4585 PE=4 SV=1 - [Q0B6T8_BURCM]	423.51	14.56	1	6	6	12	666	70.7788	5.80811
Q0B9B5	Short-chain dehydrogenase/reductase SDR OS=Burkholderia ambifaria (strain ATCC BAA-244 / AMMD) OX=339670 GN=Bamb_3704 PE=3 SV=1 - [Q0B9B5_BURCM]	420.62	38.26	1	6	6	12	264	27.5462	5.30029
Q0B5N8	FAD-binding 9, siderophore-interacting domain protein OS=Burkholderia ambifaria (strain ATCC BAA-244 / AMMD) OX=339670 GN=Bamb_4986 PE=4 SV=1 - [Q0B5N8_BURCM]	420.23	38.1	1	8	8	18	273	29.9265	6.69775
Q0BDI3	Bacterioferritin OS=Burkholderia ambifaria (strain ATCC BAA-244 / AMMD) OX=339670 GN=Bamb_2234 PE=3 SV=1 - [Q0BDI3_BURCM]	419.05	65.19	1	9	9	18	158	18.5512	4.85596
Q0BGV2	Arginine succinyltransferase OS=Burkholderia ambifaria (strain ATCC BAA-244 / AMMD) OX=339670 GN=Bamb_1062 PE=4 SV=1 - [Q0BGV2_BURCM]	416.78	37.96	1	9	9	20	353	38.5375	5.47803
Q0BJ34	50S ribosomal protein L5 OS=Burkholderia ambifaria (strain ATCC BAA-244 / AMMD) OX=339670 GN=rplE PE=3 SV=1 - [RL5_BURCM]	416.53	52.51	1	9	9	20	179	20.0288	9.87646
Q0B4I8	Amino acid adenylation domain protein OS=Burkholderia ambifaria (strain ATCC BAA-244 / AMMD) OX=339670 GN=Bamb_5388 PE=3 SV=1 - [Q0B4I8_BURCM]	414.72	16.85	1	9	9	15	997	109.554	6.12549
Q0BFZ4	Uncharacterized protein OS=Burkholderia ambifaria (strain ATCC BAA-244 / AMMD) OX=339670 GN=Bamb_1371 PE=4 SV=1 - [Q0BFZ4_BURCM]	411.77	35.56	1	2	2	11	90	9.51597	9.36377
Q0BG03	50S ribosomal protein L20 OS=Burkholderia ambifaria (strain ATCC BAA-244 / AMMD) OX=339670 GN=rplT PE=3 SV=1 - [RL20_BURCM]	408.91	42.02	1	6	6	18	119	13.6497	11.6636
Q0BIU7	Amino acid ABC transporter substrate-binding protein, PAAT family OS=Burkholderia ambifaria (strain ATCC BAA-244 / AMMD) OX=339670 GN=Bamb_0366 PE=4 SV=1 - [Q0BIU7_BURCM]	408.77	37.22	1	7	7	13	266	28.9133	9.43701
Q0BAR0	YaeQ family protein OS=Burkholderia ambifaria (strain ATCC BAA-244 / AMMD) OX=339670 GN=Bamb_3207 PE=4 SV=1 - [Q0BAR0_BURCM]	406.69	43	1	6	6	13	207	22.8848	8.19189
Q0BJ41	50S ribosomal protein L22 OS=Burkholderia ambifaria (strain ATCC BAA-244 / AMMD) OX=339670 GN=rplV PE=3 SV=1 - [RL22_BURCM]	406.16	35.78	1	4	4	14	109	11.8086	10.2427
Q0B5P1	Probable acetoacetate decarboxylase OS=Burkholderia ambifaria (strain ATCC BAA-244 / AMMD) OX=339670 GN=adc PE=3 SV=1 - [ADC_BURCM]	405.77	56.5	1	10	10	21	246	27.3951	5.78271
Q0B8M4	Fumarylacetoacetate (FAA) hydrolase OS=Burkholderia ambifaria (strain ATCC BAA-244 / AMMD) OX=339670 GN=Bamb_3945 PE=4 SV=1 - [Q0B8M4_BURCM]	405.57	27.59	1	3	3	9	232	24.7695	5.46533
Q0BH01	Pyridoxine 5'-phosphate synthase OS=Burkholderia ambifaria (strain ATCC BAA-244 / AMMD) OX=339670 GN=pdxJ PE=3 SV=1 - [Q0BH01_BURCM]	404.62	37.6	1	7	7	16	258	27.8434	6.13818
Q0BIQ2	Glutaredoxin OS=Burkholderia ambifaria (strain ATCC BAA-244 / AMMD) OX=339670 GN=Bamb_0412 PE=3 SV=1 - [Q0BIQ2_BURCM]	404.62	57.28	1	5	5	17	103	11.6047	4.76709
Q0BDC4	Amino acid/amide ABC transporter substrate-binding protein, HAAT family OS=Burkholderia ambifaria (strain ATCC BAA-244 / AMMD) OX=339670 GN=Bamb_2293 PE=4 SV=1 - [Q0BDC4_BURCM]	403.62	29.59	1	7	7	11	419	44.8526	8.54346
Q0BCQ9	Uncharacterized protein OS=Burkholderia ambifaria (strain ATCC BAA-244 / AMMD) OX=339670 GN=Bamb_2508 PE=4 SV=1 - [Q0BCQ9_BURCM]	399.37	33.88	1	7	7	14	245	25.441	9.14404
Q0B3K3	Alpha/beta hydrolase fold protein OS=Burkholderia ambifaria (strain ATCC BAA-244 / AMMD) OX=339670 GN=Bamb_5723 PE=4 SV=1 - [Q0B3K3_BURCM]	397.17	42.45	1	7	7	12	278	30.3984	6.46826
Q0BJL1	Uroporphyrinogen decarboxylase OS=Burkholderia ambifaria (strain ATCC BAA-244 / AMMD) OX=339670 GN=hemE PE=3 SV=1 - [Q0BJL1_BURCM]	396.55	27.55	1	7	7	13	392	42.3539	6.69775
Q0B683	Histidine triad (HIT) protein OS=Burkholderia ambifaria (strain ATCC BAA-244 / AMMD) OX=339670 GN=Bamb_4791 PE=4 SV=1 - [Q0B683_BURCM]	394.27	53.96	1	4	4	11	139	14.9507	6.06201
Q0BCP1	Amino acid/amide ABC transporter substrate-binding protein, HAAT family OS=Burkholderia ambifaria (strain ATCC BAA-244 / AMMD) OX=339670 GN=Bamb_2526 PE=4 SV=1 - [Q0BCP1_BURCM]	393.33	37.92	1	8	8	16	385	40.4553	9.17334
Q0B138	Single-stranded DNA-binding protein OS=Burkholderia ambifaria (strain ATCC BAA-244 / AMMD) OX=339670 GN=Bamb_6592 PE=3 SV=1 - [Q0B138_BURCM]	392.1	52.21	1	5	5	11	113	12.6473	7.40088
Q0B8T7	Pyridoxal-5'-phosphate-dependent enzyme, beta subunit OS=Burkholderia ambifaria (strain ATCC BAA-244 / AMMD) OX=339670 GN=Bamb_3882 PE=4 SV=1 - [Q0B8T7_BURCM]	390.37	39.2	1	8	8	14	324	34.5236	6.72705
Q0BJP4	Putative pterin-4-alpha-carbinolamine dehydratase OS=Burkholderia ambifaria (strain ATCC BAA-244 / AMMD) OX=339670 GN=Bamb_0068 PE=3 SV=1 - [PHS_BURCM]	390.23	75.49	1	5	5	18	102	11.7829	6.96143
Q0B6P9	Inosine/uridine-preferring nucleoside hydrolase OS=Burkholderia ambifaria (strain ATCC BAA-244 / AMMD) OX=339670 GN=Bamb_4624 PE=4 SV=1 - [Q0B6P9_BURCM]	389.58	27.43	1	6	6	10	350	37.1126	6.93213
Q0BF35	2-nitropropane dioxygenase, NPD OS=Burkholderia ambifaria (strain ATCC BAA-244 / AMMD) OX=339670 GN=Bamb_1681 PE=4 SV=1 - [Q0BF35_BURCM]	389.32	44.95	1	11	11	19	396	42.4103	7.82568
Q0BE31	Putative phosphoenolpyruvate synthase regulatory protein OS=Burkholderia ambifaria (strain ATCC BAA-244 / AMMD) OX=339670 GN=Bamb_2036 PE=3 SV=1 - [PSRP_BURCM]	388.13	24.72	1	5	5	14	271	30.6287	6.06201
Q0B9G9	Uncharacterized protein OS=Burkholderia ambifaria (strain ATCC BAA-244 / AMMD) OX=339670 GN=Bamb_3650 PE=4 SV=1 - [Q0B9G9_BURCM]	386.36	58.26	1	5	5	14	115	12.4012	6.52197
Q0BBG0	Uncharacterized protein OS=Burkholderia ambifaria (strain ATCC BAA-244 / AMMD) OX=339670 GN=Bamb_2957 PE=4 SV=1 - [Q0BBG0_BURCM]	384.9	42.47	2	9	9	17	292	34.3511	6.20166
Q0B9U3	Proline iminopeptidase OS=Burkholderia ambifaria (strain ATCC BAA-244 / AMMD) OX=339670 GN=Bamb_3526 PE=3 SV=1 - [Q0B9U3_BURCM]	383.34	26.45	1	7	7	17	310	34.6243	5.73193
Q0BJ47	30S ribosomal protein S10 OS=Burkholderia ambifaria (strain ATCC BAA-244 / AMMD) OX=339670 GN=rpsJ PE=3 SV=1 - [RS10_BURCM]	382.86	49.51	1	5	5	11	103	11.8205	9.77393
Q0BEV9	RNA polymerase sigma factor RpoS OS=Burkholderia ambifaria (strain ATCC BAA-244 / AMMD) OX=339670 GN=rpoS PE=3 SV=1 - [Q0BEV9_BURCM]	380.81	29.92	1	9	9	14	361	40.828	5.36377
Q0BC21	tRNA-2-methylthio-N(6)-dimethylallyladenosine synthase OS=Burkholderia ambifaria (strain ATCC BAA-244 / AMMD) OX=339670 GN=miaB PE=3 SV=1 - [MIAB_BURCM]	377.86	29.32	1	9	9	15	457	50.752	6.37939
Q0BDD4	NADH dehydrogenase subunit E OS=Burkholderia ambifaria (strain ATCC BAA-244 / AMMD) OX=339670 GN=Bamb_2283 PE=4 SV=1 - [Q0BDD4_BURCM]	377.17	48.45	1	5	5	13	161	17.5746	5.14795
Q0BBF2	Methionine synthase (B12-dependent) OS=Burkholderia ambifaria (strain ATCC BAA-244 / AMMD) OX=339670 GN=Bamb_2965 PE=4 SV=1 - [Q0BBF2_BURCM]	377.13	27.32	1	7	7	10	355	38.3243	5.0083
Q0BEQ6	30S ribosomal protein S6 OS=Burkholderia ambifaria (strain ATCC BAA-244 / AMMD) OX=339670 GN=rpsF PE=3 SV=1 - [RS6_BURCM]	376.94	75.81	1	7	7	17	124	14.3252	7.18115
Q0BG24	Chorismate synthase OS=Burkholderia ambifaria (strain ATCC BAA-244 / AMMD) OX=339670 GN=aroC PE=3 SV=1 - [AROC_BURCM]	376.38	24.32	1	6	6	14	366	38.9577	5.98584
Q0BEG7	Peptidylprolyl isomerase OS=Burkholderia ambifaria (strain ATCC BAA-244 / AMMD) OX=339670 GN=Bamb_1900 PE=4 SV=1 - [Q0BEG7_BURCM]	374.18	40.38	1	9	9	17	260	28.6591	8.96826
Q0BAM2	Sulfurtransferase OS=Burkholderia ambifaria (strain ATCC BAA-244 / AMMD) OX=339670 GN=Bamb_3246 PE=4 SV=1 - [Q0BAM2_BURCM]	373.85	34.6	1	6	6	14	289	30.5614	6.65381
Q0B7I0	Malate/L-lactate dehydrogenase OS=Burkholderia ambifaria (strain ATCC BAA-244 / AMMD) OX=339670 GN=Bamb_4341 PE=3 SV=1 - [Q0B7I0_BURCM]	373.73	36.31	1	10	10	16	369	39.1276	6.22705
Q0BAT0	D-isomer specific 2-hydroxyacid dehydrogenase, NAD-binding protein OS=Burkholderia ambifaria (strain ATCC BAA-244 / AMMD) OX=339670 GN=Bamb_3187 PE=3 SV=1 - [Q0BAT0_BURCM]	373.36	23.74	1	6	6	14	337	37.3833	6.88818
Q0BCF3	Thioredoxin OS=Burkholderia ambifaria (strain ATCC BAA-244 / AMMD) OX=339670 GN=Bamb_2614 PE=4 SV=1 - [Q0BCF3_BURCM]	373.08	51.42	1	10	10	16	282	31.261	4.7417
Q0BAH1	Extracellular solute-binding protein, family 1 OS=Burkholderia ambifaria (strain ATCC BAA-244 / AMMD) OX=339670 GN=Bamb_3297 PE=4 SV=1 - [Q0BAH1_BURCM]	371.24	21.55	1	5	5	11	348	37.8133	8.66064
Q0BJ38	50S ribosomal protein L29 OS=Burkholderia ambifaria (strain ATCC BAA-244 / AMMD) OX=339670 GN=rpmC PE=3 SV=1 - [RL29_BURCM]	370.82	45.31	1	3	3	11	64	7.30704	10.7261
Q0BAG1	Uncharacterized protein OS=Burkholderia ambifaria (strain ATCC BAA-244 / AMMD) OX=339670 GN=Bamb_3307 PE=4 SV=1 - [Q0BAG1_BURCM]	370.34	57.4	1	7	7	19	169	17.8604	9.77393
Q0B5B9	Amino acid/amide ABC transporter substrate-binding protein, HAAT family OS=Burkholderia ambifaria (strain ATCC BAA-244 / AMMD) OX=339670 GN=Bamb_5105 PE=4 SV=1 - [Q0B5B9_BURCM]	368.5	7.35	1	1	2	15	381	40.1396	8.86572
Q0BCE8	Peptide methionine sulfoxide reductase MsrA OS=Burkholderia ambifaria (strain ATCC BAA-244 / AMMD) OX=339670 GN=msrA PE=3 SV=1 - [Q0BCE8_BURCM]	367.22	55.38	1	6	6	14	186	20.9082	5.37646
Q0BDL1	Formimidoylglutamate deiminase OS=Burkholderia ambifaria (strain ATCC BAA-244 / AMMD) OX=339670 GN=Bamb_2206 PE=4 SV=1 - [Q0BDL1_BURCM]	366.88	23.58	1	6	6	12	458	50.0482	6.49365
Q0BJ37	30S ribosomal protein S17 OS=Burkholderia ambifaria (strain ATCC BAA-244 / AMMD) OX=339670 GN=rpsQ PE=3 SV=1 - [RS17_BURCM]	366.19	18.89	1	2	2	16	90	10.2545	9.80322
Q0BFA9	2-nitropropane dioxygenase, NPD OS=Burkholderia ambifaria (strain ATCC BAA-244 / AMMD) OX=339670 GN=Bamb_1606 PE=4 SV=1 - [Q0BFA9_BURCM]	365.26	25.14	1	5	5	10	366	37.9817	6.53662
Q0BEC7	2-hydroxy-3-oxopropionate reductase OS=Burkholderia ambifaria (strain ATCC BAA-244 / AMMD) OX=339670 GN=Bamb_1940 PE=4 SV=1 - [Q0BEC7_BURCM]	363.35	41.41	1	7	7	11	297	30.0484	6.30322
Q0B9W3	Amino acid/amide ABC transporter substrate-binding protein, HAAT family OS=Burkholderia ambifaria (strain ATCC BAA-244 / AMMD) OX=339670 GN=Bamb_3506 PE=4 SV=1 - [Q0B9W3_BURCM]	362.39	39.95	1	8	9	15	388	40.3051	9.48096
Q0BDU1	FKBP-type peptidyl-prolyl cis-trans isomerases 2-like protein OS=Burkholderia ambifaria (strain ATCC BAA-244 / AMMD) OX=339670 GN=Bamb_2126 PE=4 SV=1 - [Q0BDU1_BURCM]	362.35	88.33	1	6	6	16	180	19.9534	4.23389
Q0BBZ6	Acetyl-CoA acetyltransferase OS=Burkholderia ambifaria (strain ATCC BAA-244 / AMMD) OX=339670 GN=Bamb_2771 PE=3 SV=1 - [Q0BBZ6_BURCM]	360.64	25.81	1	7	7	13	399	41.8676	6.44287
Q0BIC0	Ferric uptake regulation protein OS=Burkholderia ambifaria (strain ATCC BAA-244 / AMMD) OX=339670 GN=fur PE=3 SV=1 - [Q0BIC0_BURCM]	358.01	48.59	1	5	5	13	142	16.2292	6.40479
Q0BFK5	Putative serine protein kinase, PrkA OS=Burkholderia ambifaria (strain ATCC BAA-244 / AMMD) OX=339670 GN=Bamb_1510 PE=4 SV=1 - [Q0BFK5_BURCM]	357.04	21.41	1	9	9	18	640	73.3542	5.65576
Q0BGV1	Arginine succinyltransferase OS=Burkholderia ambifaria (strain ATCC BAA-244 / AMMD) OX=339670 GN=Bamb_1063 PE=4 SV=1 - [Q0BGV1_BURCM]	356.43	43.97	1	8	8	17	348	37.9672	5.57959
Q0B880	Hydroxylamine reductase OS=Burkholderia ambifaria (strain ATCC BAA-244 / AMMD) OX=339670 GN=hcp PE=3 SV=1 - [HCP_BURCM]	356.36	20	1	7	7	13	555	58.8592	6.354
Q0BGM4	Heat shock protein Hsp20 OS=Burkholderia ambifaria (strain ATCC BAA-244 / AMMD) OX=339670 GN=Bamb_1141 PE=3 SV=1 - [Q0BGM4_BURCM]	356.28	55.4	1	6	6	13	139	15.4451	7.54736
Q0BAY6	Diaminopimelate epimerase OS=Burkholderia ambifaria (strain ATCC BAA-244 / AMMD) OX=339670 GN=dapF PE=3 SV=1 - [DAPF_BURCM]	355.61	39.79	1	6	6	11	289	30.8346	5.80811
Q0B8Z4	Alcohol dehydrogenase, zinc-binding domain protein OS=Burkholderia ambifaria (strain ATCC BAA-244 / AMMD) OX=339670 GN=Bamb_3825 PE=4 SV=1 - [Q0B8Z4_BURCM]	355.16	44.6	1	10	10	15	352	37.2072	6.43018
Q0BAX8	ATP-dependent protease ATPase subunit HslU OS=Burkholderia ambifaria (strain ATCC BAA-244 / AMMD) OX=339670 GN=hslU PE=3 SV=1 - [HSLU_BURCM]	354.22	17.9	1	6	6	14	447	49.73	5.42725
Q0B8C0	Uncharacterized protein OS=Burkholderia ambifaria (strain ATCC BAA-244 / AMMD) OX=339670 GN=Bamb_4050 PE=4 SV=1 - [Q0B8C0_BURCM]	354.19	47.73	1	5	5	13	88	9.94088	8.11865
Q0BHU6	Transport-associated protein OS=Burkholderia ambifaria (strain ATCC BAA-244 / AMMD) OX=339670 GN=Bamb_0718 PE=4 SV=1 - [Q0BHU6_BURCM]	353.39	38.84	1	4	4	10	121	12.0305	9.87646
Q0BDH0	Uncharacterized protein probably involved in high-affinity Fe2+ transport OS=Burkholderia ambifaria (strain ATCC BAA-244 / AMMD) OX=339670 GN=Bamb_2247 PE=4 SV=1 - [Q0BDH0_BURCM]	353.25	59.02	1	6	6	14	183	19.7127	6.80029
Q0BG14	Butyryl-CoA:acetate CoA transferase OS=Burkholderia ambifaria (strain ATCC BAA-244 / AMMD) OX=339670 GN=Bamb_1351 PE=4 SV=1 - [Q0BG14_BURCM]	351.74	51.17	1	6	6	15	213	22.2045	4.75439
Q0B127	ParB-like partition proteins OS=Burkholderia ambifaria (strain ATCC BAA-244 / AMMD) OX=339670 GN=Bamb_6603 PE=3 SV=1 - [Q0B127_BURCM]	351.36	20.63	1	6	6	14	349	38.1165	5.08447
Q0BBC5	Sulfate ABC transporter, periplasmic sulfate-binding protein OS=Burkholderia ambifaria (strain ATCC BAA-244 / AMMD) OX=339670 GN=Bamb_2992 PE=4 SV=1 - [Q0BBC5_BURCM]	349.46	30.38	1	7	7	15	339	36.736	9.12939
Q0BJ42	30S ribosomal protein S19 OS=Burkholderia ambifaria (strain ATCC BAA-244 / AMMD) OX=339670 GN=rpsS PE=3 SV=1 - [RS19_BURCM]	347.72	57.14	1	5	5	13	91	10.1015	10.3745
Q0BJ30	50S ribosomal protein L18 OS=Burkholderia ambifaria (strain ATCC BAA-244 / AMMD) OX=339670 GN=rplR PE=3 SV=1 - [RL18_BURCM]	347.4	55.37	1	6	6	11	121	13.0981	10.5796
Q0BEH0	Peptide methionine sulfoxide reductase MsrB OS=Burkholderia ambifaria (strain ATCC BAA-244 / AMMD) OX=339670 GN=msrB PE=3 SV=1 - [MSRB_BURCM]	346.61	59.44	1	5	5	10	143	16.2566	5.74463
Q0BBU1	Cobyrinic acid a,c-diamide synthase OS=Burkholderia ambifaria (strain ATCC BAA-244 / AMMD) OX=339670 GN=Bamb_2826 PE=4 SV=1 - [Q0BBU1_BURCM]	346.15	29.13	1	5	5	10	254	28.3427	5.60498
Q0BEX2	RNA-binding protein Hfq OS=Burkholderia ambifaria (strain ATCC BAA-244 / AMMD) OX=339670 GN=hfq PE=3 SV=1 - [HFQ_BURCM]	345.26	46.25	1	4	4	15	80	8.95871	8.55811
Q0BHY9	Cell division coordinator CpoB OS=Burkholderia ambifaria (strain ATCC BAA-244 / AMMD) OX=339670 GN=cpoB PE=3 SV=1 - [Q0BHY9_BURCM]	345.23	24.1	1	4	4	10	249	27.3988	8.68994
Q0BCJ2	Uncharacterized protein OS=Burkholderia ambifaria (strain ATCC BAA-244 / AMMD) OX=339670 GN=Bamb_2575 PE=4 SV=1 - [Q0BCJ2_BURCM]	344.15	28.92	1	5	5	11	166	18.1542	8.86572
Q0BE99	Uncharacterized protein OS=Burkholderia ambifaria (strain ATCC BAA-244 / AMMD) OX=339670 GN=Bamb_1968 PE=4 SV=1 - [Q0BE99_BURCM]	343.69	65.03	1	7	7	14	163	17.8507	5.99854
Q0BIW4	Imidazole glycerol phosphate synthase subunit HisF OS=Burkholderia ambifaria (strain ATCC BAA-244 / AMMD) OX=339670 GN=hisF PE=3 SV=1 - [HIS6_BURCM]	343.65	30.35	1	6	6	11	257	27.2601	5.40186
Q0BFY5	Ribosome maturation factor RimP OS=Burkholderia ambifaria (strain ATCC BAA-244 / AMMD) OX=339670 GN=rimP PE=3 SV=1 - [RIMP_BURCM]	343.09	44.74	1	5	5	11	152	17.0589	5.2749
Q0BIQ6	Cold-shock DNA-binding protein family OS=Burkholderia ambifaria (strain ATCC BAA-244 / AMMD) OX=339670 GN=Bamb_0408 PE=4 SV=1 - [Q0BIQ6_BURCM]	343	47.76	1	2	2	9	67	7.35374	5.97314
Q0B3M8	ATPase AAA-2 domain protein OS=Burkholderia ambifaria (strain ATCC BAA-244 / AMMD) OX=339670 GN=Bamb_5698 PE=4 SV=1 - [Q0B3M8_BURCM]	340.18	28.5	1	10	10	16	607	66.3779	6.26514
Q0BAT6	Methionyl-tRNA formyltransferase OS=Burkholderia ambifaria (strain ATCC BAA-244 / AMMD) OX=339670 GN=fmt PE=3 SV=1 - [FMT_BURCM]	340.06	27.22	1	6	6	11	327	34.058	6.55127
Q0BEP1	Uncharacterized protein OS=Burkholderia ambifaria (strain ATCC BAA-244 / AMMD) OX=339670 GN=Bamb_1826 PE=4 SV=1 - [Q0BEP1_BURCM]	339.44	61.86	1	5	5	13	118	12.2521	8.06006
Q0BG05	Translation initiation factor IF-3 OS=Burkholderia ambifaria (strain ATCC BAA-244 / AMMD) OX=339670 GN=infC PE=3 SV=1 - [Q0BG05_BURCM]	338.83	51.92	1	7	7	15	156	18.2017	9.36377
Q0BGD3	Aldehyde oxidase and xanthine dehydrogenase, molybdopterin binding protein OS=Burkholderia ambifaria (strain ATCC BAA-244 / AMMD) OX=339670 GN=Bamb_1232 PE=4 SV=1 - [Q0BGD3_BURCM]	338.62	12.02	1	5	5	10	774	81.8058	8.44092
Q0BJ23	30S ribosomal protein S13 OS=Burkholderia ambifaria (strain ATCC BAA-244 / AMMD) OX=339670 GN=rpsM PE=3 SV=1 - [RS13_BURCM]	338.34	57.85	1	7	7	16	121	13.6314	11.2241
Q0B5Y8	Phospho-2-dehydro-3-deoxyheptonate aldolase OS=Burkholderia ambifaria (strain ATCC BAA-244 / AMMD) OX=339670 GN=Bamb_4886 PE=3 SV=1 - [Q0B5Y8_BURCM]	338.02	38.83	1	9	10	18	376	40.9608	6.25244
Q0BD19	Uncharacterized protein OS=Burkholderia ambifaria (strain ATCC BAA-244 / AMMD) OX=339670 GN=Bamb_2398 PE=4 SV=1 - [Q0BD19_BURCM]	333.3	34.25	1	4	4	12	146	15.6001	7.25439
Q0BE26	3-hydroxyacyl-[acyl-carrier-protein] dehydratase FabZ OS=Burkholderia ambifaria (strain ATCC BAA-244 / AMMD) OX=339670 GN=fabZ PE=3 SV=2 - [FABZ_BURCM]	330.73	23.23	1	3	3	8	155	17.3514	7.50342
Q0BGL8	Uncharacterized protein OS=Burkholderia ambifaria (strain ATCC BAA-244 / AMMD) OX=339670 GN=Bamb_1147 PE=4 SV=1 - [Q0BGL8_BURCM]	330.18	21.72	1	8	8	12	548	60.1682	6.93213
Q0BBQ0	Phosphopantetheine adenylyltransferase OS=Burkholderia ambifaria (strain ATCC BAA-244 / AMMD) OX=339670 GN=coaD PE=3 SV=1 - [COAD_BURCM]	329.81	72.73	1	9	9	16	165	18.4165	8.36768
Q0BE24	Outer membrane chaperone Skp (OmpH) OS=Burkholderia ambifaria (strain ATCC BAA-244 / AMMD) OX=339670 GN=Bamb_2043 PE=3 SV=1 - [Q0BE24_BURCM]	327.5	26.86	1	6	6	15	175	19.3702	9.20264
Q0BC88	Uncharacterized protein OS=Burkholderia ambifaria (strain ATCC BAA-244 / AMMD) OX=339670 GN=Bamb_2679 PE=4 SV=1 - [Q0BC88_BURCM]	327.07	60	1	4	4	15	70	7.95394	7.91357
Q0BBE3	Beta-lactamase domain protein OS=Burkholderia ambifaria (strain ATCC BAA-244 / AMMD) OX=339670 GN=Bamb_2974 PE=4 SV=1 - [Q0BBE3_BURCM]	326.54	29.69	1	7	7	15	384	43.1348	6.85889
Q0B634	2-methylcitrate dehydratase (Trans-methylaconitate-forming) OS=Burkholderia ambifaria (strain ATCC BAA-244 / AMMD) OX=339670 GN=Bamb_4840 PE=4 SV=1 - [Q0B634_BURCM]	325.07	17.34	1	11	11	17	865	94.0272	5.51611
Q0B761	Malate dehydrogenase (Oxaloacetate-decarboxylating) (NADP(+))/Phosphate acetyltransferase OS=Burkholderia ambifaria (strain ATCC BAA-244 / AMMD) OX=339670 GN=Bamb_4462 PE=4 SV=1 - [Q0B761_BURCM]	325.04	26.37	1	11	12	18	766	82.6652	5.38916
Q0BF69	Uncharacterized protein OS=Burkholderia ambifaria (strain ATCC BAA-244 / AMMD) OX=339670 GN=Bamb_1647 PE=4 SV=1 - [Q0BF69_BURCM]	324.65	37.22	1	7	7	15	180	19.3457	9.49561
Q0BC06	4-hydroxythreonine-4-phosphate dehydrogenase OS=Burkholderia ambifaria (strain ATCC BAA-244 / AMMD) OX=339670 GN=pdxA PE=3 SV=1 - [Q0BC06_BURCM]	324.19	31.31	1	7	7	13	329	34.0328	6.17627
Q0B900	3-oxoacyl-[acyl-carrier-protein] reductase OS=Burkholderia ambifaria (strain ATCC BAA-244 / AMMD) OX=339670 GN=Bamb_3819 PE=4 SV=1 - [Q0B900_BURCM]	323.65	65.32	1	9	10	16	248	26.088	6.3667
Q0BHC8	Amidase OS=Burkholderia ambifaria (strain ATCC BAA-244 / AMMD) OX=339670 GN=Bamb_0886 PE=3 SV=1 - [Q0BHC8_BURCM]	322.35	34.5	1	7	7	12	458	47.4537	6.25244
Q0B847	Putative signal-transduction protein with CBS domains OS=Burkholderia ambifaria (strain ATCC BAA-244 / AMMD) OX=339670 GN=Bamb_4123 PE=4 SV=1 - [Q0B847_BURCM]	322.28	55.56	1	7	7	14	153	16.8138	6.53662
Q0BDB5	Acetolactate synthase, small subunit OS=Burkholderia ambifaria (strain ATCC BAA-244 / AMMD) OX=339670 GN=Bamb_2302 PE=4 SV=1 - [Q0BDB5_BURCM]	321.74	57.67	1	6	6	11	163	18.0187	5.96045
Q0BCJ9	Cold-shock DNA-binding protein family OS=Burkholderia ambifaria (strain ATCC BAA-244 / AMMD) OX=339670 GN=Bamb_2568 PE=4 SV=1 - [Q0BCJ9_BURCM]	321.32	55.22	1	2	2	13	67	7.21662	7.23975
Q0BJ21	30S ribosomal protein S4 OS=Burkholderia ambifaria (strain ATCC BAA-244 / AMMD) OX=339670 GN=rpsD PE=3 SV=2 - [RS4_BURCM]	321.1	44.93	1	9	9	18	207	23.1713	10.1255
Q0BGI0	Ppx/GppA phosphatase OS=Burkholderia ambifaria (strain ATCC BAA-244 / AMMD) OX=339670 GN=Bamb_1185 PE=4 SV=1 - [Q0BGI0_BURCM]	319.96	22.42	1	8	8	13	504	54.9214	6.49365
Q0BAT5	Peptide deformylase OS=Burkholderia ambifaria (strain ATCC BAA-244 / AMMD) OX=339670 GN=def PE=3 SV=1 - [Q0BAT5_BURCM]	319.04	64.67	1	7	7	15	167	19.1859	5.61768
Q0BH20	Uncharacterized protein OS=Burkholderia ambifaria (strain ATCC BAA-244 / AMMD) OX=339670 GN=Bamb_0994 PE=4 SV=1 - [Q0BH20_BURCM]	318.67	26.54	1	3	3	7	211	23.2232	4.4624
Q0BCV4	Aldehyde dehydrogenase (NAD(+)) OS=Burkholderia ambifaria (strain ATCC BAA-244 / AMMD) OX=339670 GN=Bamb_2463 PE=3 SV=1 - [Q0BCV4_BURCM]	318.3	41.34	1	9	9	16	479	50.3839	6.13818
Q0BD29	Endoribonuclease L-PSP OS=Burkholderia ambifaria (strain ATCC BAA-244 / AMMD) OX=339670 GN=Bamb_2388 PE=4 SV=1 - [Q0BD29_BURCM]	317.84	64.47	1	4	4	13	152	15.7733	6.3667
Q0BJA2	PAAR repeat-containing protein OS=Burkholderia ambifaria (strain ATCC BAA-244 / AMMD) OX=339670 GN=Bamb_0211 PE=4 SV=1 - [Q0BJA2_BURCM]	316.31	79.57	1	5	5	13	93	9.95396	6.7124
Q0BAX4	Acetylglutamate kinase OS=Burkholderia ambifaria (strain ATCC BAA-244 / AMMD) OX=339670 GN=argB PE=3 SV=2 - [ARGB_BURCM]	315.64	51.51	1	9	9	14	299	32.0509	5.2876
Q0BH39	Ferredoxin OS=Burkholderia ambifaria (strain ATCC BAA-244 / AMMD) OX=339670 GN=Bamb_0975 PE=4 SV=1 - [Q0BH39_BURCM]	314.91	44.86	1	5	5	14	107	11.9395	4.41162
Q0BJ25	Translation initiation factor IF-1 1 OS=Burkholderia ambifaria (strain ATCC BAA-244 / AMMD) OX=339670 GN=infA1 PE=3 SV=1 - [IF11_BURCM]	313.93	69.44	1	4	4	10	72	8.2124	9.59814
Q0BBQ2	Histidinol-phosphate aminotransferase OS=Burkholderia ambifaria (strain ATCC BAA-244 / AMMD) OX=339670 GN=hisC PE=3 SV=1 - [Q0BBQ2_BURCM]	313.61	22.25	1	5	5	12	355	39.0112	6.46826
Q0BHS1	Bis(5'-nucleosyl)-tetraphosphatase, symmetrical OS=Burkholderia ambifaria (strain ATCC BAA-244 / AMMD) OX=339670 GN=apaH PE=3 SV=1 - [Q0BHS1_BURCM]	313.27	36.56	1	6	6	12	279	30.5475	5.93506
Q0BIW3	Phosphoribosyl-AMP cyclohydrolase OS=Burkholderia ambifaria (strain ATCC BAA-244 / AMMD) OX=339670 GN=hisI PE=3 SV=1 - [HIS3_BURCM]	312.65	38.41	1	5	5	11	138	15.8329	6.02393
Q0BC97	N5-carboxyaminoimidazole ribonucleotide synthase OS=Burkholderia ambifaria (strain ATCC BAA-244 / AMMD) OX=339670 GN=purK PE=3 SV=1 - [Q0BC97_BURCM]	309.23	46.23	1	8	8	18	398	41.5371	5.77002
Q0BD32	Uncharacterized protein OS=Burkholderia ambifaria (strain ATCC BAA-244 / AMMD) OX=339670 GN=Bamb_2385 PE=4 SV=1 - [Q0BD32_BURCM]	308.69	33.91	1	6	6	14	230	24.7307	6.3667
Q0B688	Uncharacterized protein OS=Burkholderia ambifaria (strain ATCC BAA-244 / AMMD) OX=339670 GN=Bamb_4786 PE=4 SV=1 - [Q0B688_BURCM]	308.01	29.25	1	8	8	16	335	37.6259	6.0874
Q0BIM6	Anthranilate synthase, component II OS=Burkholderia ambifaria (strain ATCC BAA-244 / AMMD) OX=339670 GN=Bamb_0438 PE=4 SV=1 - [Q0BIM6_BURCM]	307.25	46.73	1	5	5	14	199	21.955	5.8335
Q0BCB6	S-formylglutathione hydrolase OS=Burkholderia ambifaria (strain ATCC BAA-244 / AMMD) OX=339670 GN=Bamb_2651 PE=3 SV=1 - [Q0BCB6_BURCM]	307.22	39.01	1	8	8	19	282	30.5011	6.56592
Q0BF01	Zinc-type alcohol dehydrogenase-like protein OS=Burkholderia ambifaria (strain ATCC BAA-244 / AMMD) OX=339670 GN=Bamb_1716 PE=3 SV=1 - [Q0BF01_BURCM]	306.37	22.71	1	5	5	11	339	36.3062	6.13818
Q0BAG2	2-methylcitrate dehydratase OS=Burkholderia ambifaria (strain ATCC BAA-244 / AMMD) OX=339670 GN=Bamb_3306 PE=4 SV=1 - [Q0BAG2_BURCM]	305.48	19.25	1	6	6	9	483	52.3871	6.0874
Q0BC12	D,D-heptose 1,7-bisphosphate phosphatase OS=Burkholderia ambifaria (strain ATCC BAA-244 / AMMD) OX=339670 GN=Bamb_2755 PE=3 SV=1 - [Q0BC12_BURCM]	305.31	37.97	1	5	5	10	187	20.3384	7.00537
Q0BDC7	Alcohol dehydrogenase, zinc-binding domain protein OS=Burkholderia ambifaria (strain ATCC BAA-244 / AMMD) OX=339670 GN=Bamb_2290 PE=4 SV=1 - [Q0BDC7_BURCM]	305.08	43.66	1	10	10	15	339	35.6609	5.78271
Q0BJA7	Cytochrome c, class I OS=Burkholderia ambifaria (strain ATCC BAA-244 / AMMD) OX=339670 GN=Bamb_0205 PE=4 SV=1 - [Q0BJA7_BURCM]	305.07	36.97	1	4	4	14	119	12.4425	9.92041
Q0BE15	30S ribosomal protein S2 OS=Burkholderia ambifaria (strain ATCC BAA-244 / AMMD) OX=339670 GN=rpsB PE=3 SV=1 - [RS2_BURCM]	304.01	50	1	9	9	16	246	27.082	7.6499
Q0BF68	Uncharacterized protein OS=Burkholderia ambifaria (strain ATCC BAA-244 / AMMD) OX=339670 GN=Bamb_1648 PE=4 SV=1 - [Q0BF68_BURCM]	303.84	44.06	1	4	4	9	143	15.6799	6.32861
Q0BD64	UPF0176 protein Bamb_2353 OS=Burkholderia ambifaria (strain ATCC BAA-244 / AMMD) OX=339670 GN=Bamb_2353 PE=3 SV=1 - [Y2353_BURCM]	303.74	43.31	1	9	9	16	284	31.4729	5.88428
Q0BAV7	Exodeoxyribonuclease III Xth OS=Burkholderia ambifaria (strain ATCC BAA-244 / AMMD) OX=339670 GN=Bamb_3160 PE=4 SV=1 - [Q0BAV7_BURCM]	303.21	50.19	1	10	10	21	257	29.2915	6.65381
Q0BIH9	50S ribosomal protein L27 OS=Burkholderia ambifaria (strain ATCC BAA-244 / AMMD) OX=339670 GN=rpmA PE=3 SV=1 - [RL27_BURCM]	300.85	56.32	1	4	4	13	87	9.08385	10.5503
Q0BFV2	RNA-binding protein Hfq OS=Burkholderia ambifaria (strain ATCC BAA-244 / AMMD) OX=339670 GN=hfq PE=3 SV=1 - [Q0BFV2_BURCM]	298.46	42.86	1	7	7	12	196	20.9454	9.90576
Q0BJ59	Transcription termination/antitermination protein NusG OS=Burkholderia ambifaria (strain ATCC BAA-244 / AMMD) OX=339670 GN=nusG PE=3 SV=1 - [Q0BJ59_BURCM]	298.14	44.86	1	7	7	12	185	20.9097	7.50342
Q0BE27	Acyl-[acyl-carrier-protein]--UDP-N-acetylglucosamine O-acyltransferase OS=Burkholderia ambifaria (strain ATCC BAA-244 / AMMD) OX=339670 GN=lpxA PE=3 SV=1 - [LPXA_BURCM]	296.56	32.06	1	4	4	16	262	27.8313	6.65381
Q0BI58	YceI family protein OS=Burkholderia ambifaria (strain ATCC BAA-244 / AMMD) OX=339670 GN=Bamb_0606 PE=3 SV=1 - [Q0BI58_BURCM]	294.55	38.71	1	5	5	12	186	19.523	9.34912
Q0B6T6	Propionyl-CoA carboxylase OS=Burkholderia ambifaria (strain ATCC BAA-244 / AMMD) OX=339670 GN=Bamb_4587 PE=4 SV=1 - [Q0B6T6_BURCM]	294.44	18.88	1	7	7	9	535	57.4864	7.12256
Q0BEY7	Polyphenol oxidase OS=Burkholderia ambifaria (strain ATCC BAA-244 / AMMD) OX=339670 GN=Bamb_1730 PE=3 SV=1 - [Q0BEY7_BURCM]	293.46	47.67	1	7	7	15	279	29.2009	6.63916
Q0B3L9	Peptidylprolyl isomerase OS=Burkholderia ambifaria (strain ATCC BAA-244 / AMMD) OX=339670 GN=Bamb_5707 PE=4 SV=1 - [Q0B3L9_BURCM]	293.31	43.13	1	7	7	14	262	28.3377	5.13525
Q0BCQ2	Probable cytosol aminopeptidase OS=Burkholderia ambifaria (strain ATCC BAA-244 / AMMD) OX=339670 GN=pepA PE=3 SV=1 - [AMPA_BURCM]	293.1	29.62	1	10	10	17	503	53.0895	7.62061
Q0B8U0	Isocitrate lyase OS=Burkholderia ambifaria (strain ATCC BAA-244 / AMMD) OX=339670 GN=Bamb_3879 PE=4 SV=1 - [Q0B8U0_BURCM]	290.06	21.78	1	8	8	16	528	58.3252	6.16357
Q0BJP9	NADH:flavin oxidoreductase/NADH oxidase OS=Burkholderia ambifaria (strain ATCC BAA-244 / AMMD) OX=339670 GN=Bamb_0063 PE=4 SV=1 - [Q0BJP9_BURCM]	289.18	33.78	1	8	8	12	370	40.0054	6.63916
Q0B9D5	Rhodanese domain protein OS=Burkholderia ambifaria (strain ATCC BAA-244 / AMMD) OX=339670 GN=Bamb_3684 PE=4 SV=1 - [Q0B9D5_BURCM]	288.26	11.17	1	4	4	8	555	59.8718	5.52881
Q0BJP2	Transcriptional regulator, AsnC family OS=Burkholderia ambifaria (strain ATCC BAA-244 / AMMD) OX=339670 GN=Bamb_0070 PE=4 SV=1 - [Q0BJP2_BURCM]	284.4	26.71	1	3	3	6	161	17.7686	7.13721
Q0BHR7	GDP-L-fucose synthase OS=Burkholderia ambifaria (strain ATCC BAA-244 / AMMD) OX=339670 GN=fcl PE=3 SV=1 - [Q0BHR7_BURCM]	284.11	32.15	1	6	6	12	311	34.1219	6.85889
Q0BFZ6	Uncharacterized lipoprotein-like protein OS=Burkholderia ambifaria (strain ATCC BAA-244 / AMMD) OX=339670 GN=Bamb_1369 PE=4 SV=1 - [Q0BFZ6_BURCM]	284.03	27.36	1	7	7	10	402	43.8582	7.06396
Q0B4I9	Alcohol dehydrogenase, zinc-binding domain protein OS=Burkholderia ambifaria (strain ATCC BAA-244 / AMMD) OX=339670 GN=Bamb_5387 PE=4 SV=1 - [Q0B4I9_BURCM]	279.74	42.25	1	8	8	12	329	34.6221	6.354
Q0BH66	50S ribosomal protein L19 OS=Burkholderia ambifaria (strain ATCC BAA-244 / AMMD) OX=339670 GN=rplS PE=3 SV=1 - [RL19_BURCM]	277.84	41.54	1	4	4	10	130	14.537	10.228
Q0BGH0	Phosphohistidine phosphatase, SixA OS=Burkholderia ambifaria (strain ATCC BAA-244 / AMMD) OX=339670 GN=Bamb_1195 PE=4 SV=1 - [Q0BGH0_BURCM]	277.13	26.97	1	3	3	7	152	16.2796	8.5874
Q0BHW2	Fumarylacetoacetate hydrolase OS=Burkholderia ambifaria (strain ATCC BAA-244 / AMMD) OX=339670 GN=Bamb_0702 PE=4 SV=1 - [Q0BHW2_BURCM]	275.48	27.65	1	8	8	16	434	47.0587	6.0874
Q0BCE3	Transcriptional regulator, AsnC family OS=Burkholderia ambifaria (strain ATCC BAA-244 / AMMD) OX=339670 GN=Bamb_2624 PE=4 SV=1 - [Q0BCE3_BURCM]	274.87	27.11	1	4	4	9	166	18.8008	6.53662
Q0BAX7	Response regulator receiver protein OS=Burkholderia ambifaria (strain ATCC BAA-244 / AMMD) OX=339670 GN=Bamb_3140 PE=4 SV=1 - [Q0BAX7_BURCM]	274.5	28.89	1	4	4	10	180	19.6683	5.87158
Q0BAZ0	Phytanoyl-CoA dioxygenase OS=Burkholderia ambifaria (strain ATCC BAA-244 / AMMD) OX=339670 GN=Bamb_3127 PE=4 SV=1 - [Q0BAZ0_BURCM]	274.31	20.23	1	5	5	11	257	28.7352	6.68311
Q0BJB7	Histone family protein nucleoid-structuring protein H-NS OS=Burkholderia ambifaria (strain ATCC BAA-244 / AMMD) OX=339670 GN=Bamb_0195 PE=4 SV=1 - [Q0BJB7_BURCM]	274.03	39.18	1	3	3	8	97	10.8898	9.81787
Q0BD85	Probable transcriptional regulatory protein Bamb_2332 OS=Burkholderia ambifaria (strain ATCC BAA-244 / AMMD) OX=339670 GN=Bamb_2332 PE=3 SV=1 - [Y2332_BURCM]	272.15	22.73	1	4	4	8	242	25.9649	4.89404
Q0B4I6	FAD-dependent pyridine nucleotide-disulfide oxidoreductase OS=Burkholderia ambifaria (strain ATCC BAA-244 / AMMD) OX=339670 GN=Bamb_5390 PE=3 SV=1 - [Q0B4I6_BURCM]	271.89	19.65	1	6	6	12	458	48.9031	6.21436
Q0BJ44	50S ribosomal protein L23 OS=Burkholderia ambifaria (strain ATCC BAA-244 / AMMD) OX=339670 GN=rplW PE=3 SV=1 - [RL23_BURCM]	271.8	69.23	1	6	6	12	104	11.7323	9.42236
Q0BEY2	Uncharacterized protein OS=Burkholderia ambifaria (strain ATCC BAA-244 / AMMD) OX=339670 GN=Bamb_1735 PE=4 SV=1 - [Q0BEY2_BURCM]	271.75	18	1	4	4	9	250	27.4547	9.29053
Q0B845	GreA/GreB family elongation factor OS=Burkholderia ambifaria (strain ATCC BAA-244 / AMMD) OX=339670 GN=Bamb_4125 PE=4 SV=1 - [Q0B845_BURCM]	271.64	48.48	1	5	5	10	132	14.6947	5.50342
Q0BCJ8	Multicopper oxidase, type 3 OS=Burkholderia ambifaria (strain ATCC BAA-244 / AMMD) OX=339670 GN=Bamb_2569 PE=4 SV=1 - [Q0BCJ8_BURCM]	270.67	24.29	1	10	10	13	531	57.7597	7.07861
Q0BJL6	ATP synthase gamma chain OS=Burkholderia ambifaria (strain ATCC BAA-244 / AMMD) OX=339670 GN=atpG PE=3 SV=1 - [ATPG_BURCM]	268.93	28.52	1	6	6	10	291	31.7955	9.05615
Q0BHJ4	Riboflavin synthase, alpha subunit OS=Burkholderia ambifaria (strain ATCC BAA-244 / AMMD) OX=339670 GN=Bamb_0820 PE=4 SV=1 - [Q0BHJ4_BURCM]	268.62	48.33	1	7	7	15	209	22.0834	5.74463
Q0BHD3	Guanine deaminase OS=Burkholderia ambifaria (strain ATCC BAA-244 / AMMD) OX=339670 GN=Bamb_0881 PE=4 SV=1 - [Q0BHD3_BURCM]	267.92	24.2	1	6	6	8	438	48.1372	6.354
Q0B442	Uncharacterized protein OS=Burkholderia ambifaria (strain ATCC BAA-244 / AMMD) OX=339670 GN=Bamb_5534 PE=4 SV=1 - [Q0B442_BURCM]	267.65	32.47	1	3	4	9	194	19.5432	9.70068
Q0B5R0	Arsenate reductase OS=Burkholderia ambifaria (strain ATCC BAA-244 / AMMD) OX=339670 GN=Bamb_4964 PE=3 SV=1 - [Q0B5R0_BURCM]	267.58	47.06	1	4	4	9	119	13.388	6.31592
Q0BIZ1	Glutamate synthase (NADH) small subunit OS=Burkholderia ambifaria (strain ATCC BAA-244 / AMMD) OX=339670 GN=Bamb_0322 PE=4 SV=1 - [Q0BIZ1_BURCM]	267.01	19.61	1	9	9	16	510	56.2635	6.59521
Q0BG09	Alpha/beta hydrolase fold protein OS=Burkholderia ambifaria (strain ATCC BAA-244 / AMMD) OX=339670 GN=Bamb_1356 PE=4 SV=1 - [Q0BG09_BURCM]	267.01	30.64	1	5	5	8	297	32.5867	5.69385
Q0BEP5	Uncharacterized protein OS=Burkholderia ambifaria (strain ATCC BAA-244 / AMMD) OX=339670 GN=Bamb_1822 PE=4 SV=1 - [Q0BEP5_BURCM]	266.65	41.03	1	3	4	9	195	19.7344	9.74463
Q0B5L2	Serine O-acetyltransferase OS=Burkholderia ambifaria (strain ATCC BAA-244 / AMMD) OX=339670 GN=Bamb_5012 PE=4 SV=1 - [Q0B5L2_BURCM]	266.05	23.53	1	4	4	7	306	33.0843	6.80029
Q0BJP6	Two component transcriptional regulator, winged helix family OS=Burkholderia ambifaria (strain ATCC BAA-244 / AMMD) OX=339670 GN=Bamb_0066 PE=4 SV=1 - [Q0BJP6_BURCM]	263.24	36.52	1	5	5	10	230	25.9597	6.7417
Q0B411	Amino acid ABC transporter substrate-binding protein, PAAT family OS=Burkholderia ambifaria (strain ATCC BAA-244 / AMMD) OX=339670 GN=Bamb_5565 PE=3 SV=1 - [Q0B411_BURCM]	262.9	18.46	1	2	3	6	260	28.0136	8.54346
Q0BDI7	Acetyl-coenzyme A synthetase OS=Burkholderia ambifaria (strain ATCC BAA-244 / AMMD) OX=339670 GN=acsA PE=3 SV=1 - [Q0BDI7_BURCM]	261.1	20.45	2	9	9	13	660	72.0716	6.27783
Q0BER5	Alkyl hydroperoxide reductase/ Thiol specific antioxidant/ Mal allergen OS=Burkholderia ambifaria (strain ATCC BAA-244 / AMMD) OX=339670 GN=Bamb_1802 PE=4 SV=1 - [Q0BER5_BURCM]	260.96	32.68	1	5	5	8	153	16.8508	7.95752
Q0BBX9	NADPH-dependent 7-cyano-7-deazaguanine reductase OS=Burkholderia ambifaria (strain ATCC BAA-244 / AMMD) OX=339670 GN=queF PE=3 SV=1 - [QUEF_BURCM]	260.92	32.48	1	7	7	14	274	30.3963	5.63037
Q0B3L7	Respiratory nitrate reductase chaperone NarJ OS=Burkholderia ambifaria (strain ATCC BAA-244 / AMMD) OX=339670 GN=Bamb_5709 PE=4 SV=1 - [Q0B3L7_BURCM]	260.64	42.92	1	6	6	12	233	25.6369	5.021
Q0BGH1	Uncharacterized protein OS=Burkholderia ambifaria (strain ATCC BAA-244 / AMMD) OX=339670 GN=Bamb_1194 PE=4 SV=1 - [Q0BGH1_BURCM]	259.89	16.41	1	2	2	5	195	21.5469	4.70361
Q0B7E8	Ribonuclease T2 OS=Burkholderia ambifaria (strain ATCC BAA-244 / AMMD) OX=339670 GN=Bamb_4373 PE=3 SV=1 - [Q0B7E8_BURCM]	259.27	13.17	1	2	2	4	243	25.9033	6.75635
Q0BE14	Methionine aminopeptidase OS=Burkholderia ambifaria (strain ATCC BAA-244 / AMMD) OX=339670 GN=map PE=3 SV=1 - [Q0BE14_BURCM]	258.85	32.47	1	6	6	14	271	29.6119	6.21436
Q0BAL1	RNA polymerase sigma factor RpoD OS=Burkholderia ambifaria (strain ATCC BAA-244 / AMMD) OX=339670 GN=rpoD PE=3 SV=1 - [Q0BAL1_BURCM]	257.91	13.91	1	7	7	12	805	88.8632	5.2749
Q0BC77	Uncharacterized protein OS=Burkholderia ambifaria (strain ATCC BAA-244 / AMMD) OX=339670 GN=Bamb_2690 PE=4 SV=1 - [Q0BC77_BURCM]	256.17	22.39	1	6	6	8	402	42.9175	7.72314
Q0B600	Uncharacterized protein OS=Burkholderia ambifaria (strain ATCC BAA-244 / AMMD) OX=339670 GN=Bamb_4874 PE=4 SV=1 - [Q0B600_BURCM]	255.19	20.43	1	7	7	11	465	47.6207	5.32568
Q0BIM3	Ribulose-phosphate 3-epimerase OS=Burkholderia ambifaria (strain ATCC BAA-244 / AMMD) OX=339670 GN=Bamb_0441 PE=3 SV=1 - [Q0BIM3_BURCM]	253.91	36.4	1	6	6	15	228	24.9678	5.59229
Q0BHJ3	Riboflavin biosynthesis protein RibD OS=Burkholderia ambifaria (strain ATCC BAA-244 / AMMD) OX=339670 GN=Bamb_0821 PE=3 SV=1 - [Q0BHJ3_BURCM]	253.56	27.61	1	7	7	12	373	39.5916	7.50342
Q0B6K1	RbsD or FucU transport OS=Burkholderia ambifaria (strain ATCC BAA-244 / AMMD) OX=339670 GN=Bamb_4672 PE=3 SV=1 - [Q0B6K1_BURCM]	253.48	55.63	1	5	5	10	151	16.2834	5.32568
Q0BBP4	Uncharacterized protein OS=Burkholderia ambifaria (strain ATCC BAA-244 / AMMD) OX=339670 GN=Bamb_2873 PE=4 SV=1 - [Q0BBP4_BURCM]	253.44	29.13	1	3	3	6	127	14.3233	6.93213
Q0B881	Oxidoreductase FAD/NAD(P)-binding domain protein OS=Burkholderia ambifaria (strain ATCC BAA-244 / AMMD) OX=339670 GN=Bamb_4089 PE=4 SV=1 - [Q0B881_BURCM]	253.28	37.65	1	8	8	12	340	37.0058	5.05908
Q0BER8	Formyl transferase domain protein OS=Burkholderia ambifaria (strain ATCC BAA-244 / AMMD) OX=339670 GN=Bamb_1799 PE=4 SV=1 - [Q0BER8_BURCM]	252.08	26.98	1	5	5	8	315	33.5582	6.37939
Q0BDH1	Uncharacterized protein OS=Burkholderia ambifaria (strain ATCC BAA-244 / AMMD) OX=339670 GN=Bamb_2246 PE=4 SV=1 - [Q0BDH1_BURCM]	250.89	57.27	1	5	5	10	110	11.8713	9.0415
Q0BDQ9	Ferredoxin, 2Fe-2S type, ISC system OS=Burkholderia ambifaria (strain ATCC BAA-244 / AMMD) OX=339670 GN=Bamb_2158 PE=4 SV=1 - [Q0BDQ9_BURCM]	249.86	73.45	1	5	5	13	113	12.4399	4.4751
Q0B6T5	Isovaleryl-CoA dehydrogenase OS=Burkholderia ambifaria (strain ATCC BAA-244 / AMMD) OX=339670 GN=Bamb_4588 PE=3 SV=1 - [Q0B6T5_BURCM]	249.65	25.45	1	7	7	11	393	42.8525	6.20166
Q0BFP0	Uncharacterized protein OS=Burkholderia ambifaria (strain ATCC BAA-244 / AMMD) OX=339670 GN=Bamb_1475 PE=4 SV=1 - [Q0BFP0_BURCM]	249.06	55.88	1	4	4	8	102	10.9956	5.19873
Q0BDP1	Two component transcriptional regulator, LuxR family OS=Burkholderia ambifaria (strain ATCC BAA-244 / AMMD) OX=339670 GN=Bamb_2176 PE=4 SV=1 - [Q0BDP1_BURCM]	248.92	54.25	1	6	6	9	212	23.5892	5.51611
Q0BAB3	Amidophosphoribosyltransferase OS=Burkholderia ambifaria (strain ATCC BAA-244 / AMMD) OX=339670 GN=purF PE=3 SV=1 - [Q0BAB3_BURCM]	248.82	22.94	1	8	8	13	510	56.2405	6.11279
Q0BGY1	Uncharacterized protein OS=Burkholderia ambifaria (strain ATCC BAA-244 / AMMD) OX=339670 GN=Bamb_1033 PE=4 SV=1 - [Q0BGY1_BURCM]	248.33	28.77	1	4	4	13	146	15.6701	8.14795
Q0BHV7	Aminotransferase, class V OS=Burkholderia ambifaria (strain ATCC BAA-244 / AMMD) OX=339670 GN=Bamb_0707 PE=3 SV=1 - [Q0BHV7_BURCM]	246.84	26.8	1	7	7	11	403	43.3282	6.13818
Q0B100	Conjugal transfer protein TrbG/VirB9/CagX OS=Burkholderia ambifaria (strain ATCC BAA-244 / AMMD) OX=339670 GN=Bamb_6630 PE=4 SV=1 - [Q0B100_BURCM]	246.55	25.75	1	5	5	7	299	32.6419	7.94287
Q0B206	Amino acid ABC transporter substrate-binding protein, PAAT family OS=Burkholderia ambifaria (strain ATCC BAA-244 / AMMD) OX=339670 GN=Bamb_6273 PE=4 SV=1 - [Q0B206_BURCM]	246.21	30.74	1	5	5	8	244	26.0837	5.22412
Q0B8K0	Pyrimidine/purine nucleoside phosphorylase OS=Burkholderia ambifaria (strain ATCC BAA-244 / AMMD) OX=339670 GN=ppnP PE=3 SV=1 - [PPNP_BURCM]	246.05	52.83	1	4	4	9	106	11.6147	5.13525
Q0BI93	OsmC family protein OS=Burkholderia ambifaria (strain ATCC BAA-244 / AMMD) OX=339670 GN=Bamb_0571 PE=4 SV=1 - [Q0BI93_BURCM]	245.7	37.86	1	5	5	11	140	14.9743	6.771
Q0BBI0	Lipoyl synthase OS=Burkholderia ambifaria (strain ATCC BAA-244 / AMMD) OX=339670 GN=lipA PE=3 SV=1 - [Q0BBI0_BURCM]	245.37	27.88	1	6	6	9	330	36.4965	7.02002
Q0BEW4	Nucleoside diphosphate kinase OS=Burkholderia ambifaria (strain ATCC BAA-244 / AMMD) OX=339670 GN=ndk PE=3 SV=1 - [NDK_BURCM]	245.2	52.48	1	5	5	15	141	15.3119	6.32861
Q0BFZ2	Uncharacterized protein OS=Burkholderia ambifaria (strain ATCC BAA-244 / AMMD) OX=339670 GN=Bamb_1373 PE=4 SV=1 - [Q0BFZ2_BURCM]	244.13	55.24	1	4	4	7	105	11.9011	7.1958
Q0BBK8	Protein-export protein SecB OS=Burkholderia ambifaria (strain ATCC BAA-244 / AMMD) OX=339670 GN=secB PE=3 SV=1 - [SECB_BURCM]	243.94	61.01	1	6	6	13	159	17.49	4.61475
Q0B2K2	NAD(P)H dehydrogenase (quinone) OS=Burkholderia ambifaria (strain ATCC BAA-244 / AMMD) OX=339670 GN=Bamb_6077 PE=3 SV=1 - [NQOR_BURCM]	241.96	27	1	4	4	9	200	20.9096	6.80029
Q0BEE1	Two component transcriptional regulator, winged helix family OS=Burkholderia ambifaria (strain ATCC BAA-244 / AMMD) OX=339670 GN=Bamb_1926 PE=4 SV=1 - [Q0BEE1_BURCM]	240.9	44.67	1	8	8	13	244	27.6595	6.15088
Q0BG85	Uncharacterized protein OS=Burkholderia ambifaria (strain ATCC BAA-244 / AMMD) OX=339670 GN=Bamb_1280 PE=4 SV=1 - [Q0BG85_BURCM]	239.45	34.38	1	4	4	12	128	13.6879	9.43701
Q0BDY3	Malate synthase OS=Burkholderia ambifaria (strain ATCC BAA-244 / AMMD) OX=339670 GN=Bamb_2084 PE=3 SV=1 - [Q0BDY3_BURCM]	238.75	18.11	1	8	8	11	530	59.0744	6.29053
Q0BIT3	Uncharacterized conserved protein UCP028301 OS=Burkholderia ambifaria (strain ATCC BAA-244 / AMMD) OX=339670 GN=Bamb_0381 PE=4 SV=1 - [Q0BIT3_BURCM]	238.5	53.22	1	7	7	11	171	19.2202	5.26221
Q0B998	Beta-lactamase domain protein OS=Burkholderia ambifaria (strain ATCC BAA-244 / AMMD) OX=339670 GN=Bamb_3721 PE=4 SV=1 - [Q0B998_BURCM]	238.13	18.29	1	4	4	5	339	37.4911	5.2876
Q0B7P5	Cell wall hydrolase/autolysin OS=Burkholderia ambifaria (strain ATCC BAA-244 / AMMD) OX=339670 GN=Bamb_4275 PE=4 SV=1 - [Q0B7P5_BURCM]	234.57	32.41	1	5	5	13	253	27.4374	8.99756
Q0BDU6	FAD dependent oxidoreductase OS=Burkholderia ambifaria (strain ATCC BAA-244 / AMMD) OX=339670 GN=Bamb_2121 PE=4 SV=1 - [Q0BDU6_BURCM]	234.01	18.15	1	6	6	10	540	58.6543	7.84033
Q0B5U7	OsmC family protein OS=Burkholderia ambifaria (strain ATCC BAA-244 / AMMD) OX=339670 GN=Bamb_4927 PE=4 SV=1 - [Q0B5U7_BURCM]	233.68	31.65	1	3	3	10	158	17.4425	6.354
Q0BC09	Lactoylglutathione lyase OS=Burkholderia ambifaria (strain ATCC BAA-244 / AMMD) OX=339670 GN=Bamb_2758 PE=4 SV=1 - [Q0BC09_BURCM]	233.34	35.66	1	5	5	12	129	14.4593	6.0874
Q0BEW8	Histidine--tRNA ligase OS=Burkholderia ambifaria (strain ATCC BAA-244 / AMMD) OX=339670 GN=hisS PE=3 SV=1 - [SYH_BURCM]	232.93	15.47	1	5	5	9	446	49.6403	5.03369
Q0B9W8	Alkyl hydroperoxide reductase/ Thiol specific antioxidant/ Mal allergen OS=Burkholderia ambifaria (strain ATCC BAA-244 / AMMD) OX=339670 GN=Bamb_3501 PE=4 SV=1 - [Q0B9W8_BURCM]	232.57	44.92	1	5	5	9	187	20.7435	5.23682
Q0BBF0	Uncharacterized protein OS=Burkholderia ambifaria (strain ATCC BAA-244 / AMMD) OX=339670 GN=Bamb_2967 PE=4 SV=1 - [Q0BBF0_BURCM]	231.27	58.88	1	5	5	10	107	11.821	6.06201
Q0BBZ4	Transcriptional regulator, TetR family OS=Burkholderia ambifaria (strain ATCC BAA-244 / AMMD) OX=339670 GN=Bamb_2773 PE=4 SV=1 - [Q0BBZ4_BURCM]	230.78	32.66	1	6	6	9	199	22.6856	6.43018
Q0B7N4	Amino acid ABC transporter substrate-binding protein, PAAT family OS=Burkholderia ambifaria (strain ATCC BAA-244 / AMMD) OX=339670 GN=Bamb_4286 PE=4 SV=1 - [Q0B7N4_BURCM]	230.77	44.4	1	8	8	13	259	28.0435	8.47021
Q0B2S1	ProQ activator of osmoprotectant transporter ProP OS=Burkholderia ambifaria (strain ATCC BAA-244 / AMMD) OX=339670 GN=Bamb_6008 PE=4 SV=1 - [Q0B2S1_BURCM]	230.62	21.83	1	6	6	12	284	28.4606	9.89111
Q0BCA5	Uncharacterized protein OS=Burkholderia ambifaria (strain ATCC BAA-244 / AMMD) OX=339670 GN=Bamb_2662 PE=4 SV=1 - [Q0BCA5_BURCM]	230.19	21.62	1	2	2	6	148	15.2737	8.42627
Q0B8Z3	Antibiotic biosynthesis monooxygenase OS=Burkholderia ambifaria (strain ATCC BAA-244 / AMMD) OX=339670 GN=Bamb_3826 PE=4 SV=1 - [Q0B8Z3_BURCM]	230.02	35.35	1	2	2	8	99	11.0025	5.40186
Q0BBH3	Hydrolase of the alpha/beta superfamily-like protein OS=Burkholderia ambifaria (strain ATCC BAA-244 / AMMD) OX=339670 GN=Bamb_2944 PE=4 SV=1 - [Q0BBH3_BURCM]	229.68	22.9	1	4	4	8	214	23.1662	6.68311
Q0BD47	Cytochrome c, class I OS=Burkholderia ambifaria (strain ATCC BAA-244 / AMMD) OX=339670 GN=Bamb_2370 PE=4 SV=1 - [Q0BD47_BURCM]	228.19	37.82	1	2	2	4	119	12.6644	8.98291
Q0BIL4	Molybdopterin oxidoreductase OS=Burkholderia ambifaria (strain ATCC BAA-244 / AMMD) OX=339670 GN=Bamb_0450 PE=3 SV=1 - [Q0BIL4_BURCM]	227.35	14.18	1	6	6	8	691	75.1263	6.96143
Q0BIN3	Thiol:disulfide interchange protein OS=Burkholderia ambifaria (strain ATCC BAA-244 / AMMD) OX=339670 GN=Bamb_0431 PE=3 SV=1 - [Q0BIN3_BURCM]	227.32	26.45	1	5	5	12	242	25.7463	8.86572
Q0BDY9	Acyl-coA-binding protein, ACBP OS=Burkholderia ambifaria (strain ATCC BAA-244 / AMMD) OX=339670 GN=Bamb_2078 PE=4 SV=1 - [Q0BDY9_BURCM]	227.23	51.69	1	3	3	7	89	9.80094	5.13525
Q0B125	Putative conjugation protein TraO OS=Burkholderia ambifaria (strain ATCC BAA-244 / AMMD) OX=339670 GN=Bamb_6605 PE=4 SV=1 - [Q0B125_BURCM]	227.12	53.91	1	5	5	13	115	12.4775	9.77393
Q0B1N8	Uncharacterized protein OS=Burkholderia ambifaria (strain ATCC BAA-244 / AMMD) OX=339670 GN=Bamb_6391 PE=4 SV=1 - [Q0B1N8_BURCM]	225.84	47.62	1	3	3	7	84	9.58419	5.8335
Q0BD81	Ribosomal silencing factor RsfS OS=Burkholderia ambifaria (strain ATCC BAA-244 / AMMD) OX=339670 GN=rsfS PE=3 SV=1 - [Q0BD81_BURCM]	225.79	47.95	1	5	5	11	146	16.0862	5.2876
Q0BES4	Aminotransferase OS=Burkholderia ambifaria (strain ATCC BAA-244 / AMMD) OX=339670 GN=Bamb_1793 PE=4 SV=1 - [Q0BES4_BURCM]	225.46	33.98	1	7	7	11	412	45.6425	5.73193
Q0BCK5	Deoxyuridine 5'-triphosphate nucleotidohydrolase OS=Burkholderia ambifaria (strain ATCC BAA-244 / AMMD) OX=339670 GN=dut PE=3 SV=1 - [DUT_BURCM]	225.38	36.49	1	3	3	4	148	15.9062	5.77002
Q0B205	Antibiotic biosynthesis monooxygenase OS=Burkholderia ambifaria (strain ATCC BAA-244 / AMMD) OX=339670 GN=Bamb_6274 PE=4 SV=1 - [Q0B205_BURCM]	225.09	50.42	1	6	6	12	119	13.5038	8.25049
Q0B5L6	Transcriptional regulator, Crp/Fnr family OS=Burkholderia ambifaria (strain ATCC BAA-244 / AMMD) OX=339670 GN=Bamb_5008 PE=4 SV=1 - [Q0B5L6_BURCM]	224.75	28.11	1	5	5	9	249	27.3058	8.00146
Q0BC60	Uncharacterized protein OS=Burkholderia ambifaria (strain ATCC BAA-244 / AMMD) OX=339670 GN=Bamb_2707 PE=4 SV=1 - [Q0BC60_BURCM]	224.39	71.28	1	4	4	9	94	9.76584	6.49365
Q0BBX7	N-acyl-D-amino-acid deacylase OS=Burkholderia ambifaria (strain ATCC BAA-244 / AMMD) OX=339670 GN=Bamb_2790 PE=4 SV=1 - [Q0BBX7_BURCM]	224.3	21.7	1	6	6	9	493	52.5235	5.65576
Q0BDS7	Transferase hexapeptide repeat containing protein OS=Burkholderia ambifaria (strain ATCC BAA-244 / AMMD) OX=339670 GN=Bamb_2140 PE=4 SV=1 - [Q0BDS7_BURCM]	224.11	29.31	1	3	3	7	174	18.2306	6.07471
Q0BB95	Uncharacterized protein OS=Burkholderia ambifaria (strain ATCC BAA-244 / AMMD) OX=339670 GN=Bamb_3022 PE=4 SV=1 - [Q0BB95_BURCM]	223.8	50.68	1	2	2	6	73	8.21287	4.79248
Q0BEV8	Peptidase M23B OS=Burkholderia ambifaria (strain ATCC BAA-244 / AMMD) OX=339670 GN=Bamb_1759 PE=4 SV=1 - [Q0BEV8_BURCM]	222.81	32.2	1	7	8	13	295	30.3536	9.34912
Q0BIJ5	Redoxin domain protein OS=Burkholderia ambifaria (strain ATCC BAA-244 / AMMD) OX=339670 GN=Bamb_0469 PE=4 SV=1 - [Q0BIJ5_BURCM]	222.48	45.24	1	5	5	8	168	17.6878	5.2749
Q0B8W1	Recombination-associated protein RdgC OS=Burkholderia ambifaria (strain ATCC BAA-244 / AMMD) OX=339670 GN=rdgC PE=3 SV=1 - [Q0B8W1_BURCM]	222.36	23.86	1	5	5	8	285	31.5463	5.57959
Q0BGC4	Uncharacterized protein OS=Burkholderia ambifaria (strain ATCC BAA-244 / AMMD) OX=339670 GN=Bamb_1241 PE=4 SV=1 - [Q0BGC4_BURCM]	222.15	21.92	1	4	4	7	260	27.4503	9.20264
Q0BE85	Short-chain dehydrogenase/reductase SDR OS=Burkholderia ambifaria (strain ATCC BAA-244 / AMMD) OX=339670 GN=Bamb_1982 PE=4 SV=1 - [Q0BE85_BURCM]	220.28	43.18	1	7	7	12	264	27.9667	6.96143
Q0BHY8	Peptidoglycan-associated protein OS=Burkholderia ambifaria (strain ATCC BAA-244 / AMMD) OX=339670 GN=pal PE=3 SV=1 - [Q0BHY8_BURCM]	219.49	48.52	1	6	6	11	169	18.5802	7.50342
Q0BH09	Sigma E regulatory protein, MucB/RseB OS=Burkholderia ambifaria (strain ATCC BAA-244 / AMMD) OX=339670 GN=Bamb_1005 PE=4 SV=1 - [Q0BH09_BURCM]	218.88	27.14	1	5	5	6	350	38.351	9.0415
Q0BIN5	Ribosome-binding ATPase YchF OS=Burkholderia ambifaria (strain ATCC BAA-244 / AMMD) OX=339670 GN=ychF PE=3 SV=1 - [Q0BIN5_BURCM]	218.51	38.19	1	8	8	13	364	39.1922	5.0083
Q0BIB8	4-hydroxy-tetrahydrodipicolinate reductase OS=Burkholderia ambifaria (strain ATCC BAA-244 / AMMD) OX=339670 GN=dapB PE=3 SV=1 - [DAPB_BURCM]	217.59	29.43	1	5	5	7	265	27.8564	6.27783
Q0B9T3	Sugar nucleotidyltransferase-like protein OS=Burkholderia ambifaria (strain ATCC BAA-244 / AMMD) OX=339670 GN=Bamb_3536 PE=4 SV=1 - [Q0B9T3_BURCM]	217.58	49.8	1	7	7	11	255	28.0276	4.86865
Q0B2W0	Acetyl-CoA acetyltransferase OS=Burkholderia ambifaria (strain ATCC BAA-244 / AMMD) OX=339670 GN=Bamb_5969 PE=3 SV=1 - [Q0B2W0_BURCM]	217.15	14.39	1	3	3	6	396	40.9301	7.15186
Q0BGJ3	Uncharacterized protein OS=Burkholderia ambifaria (strain ATCC BAA-244 / AMMD) OX=339670 GN=Bamb_1172 PE=4 SV=1 - [Q0BGJ3_BURCM]	216	29.14	1	4	4	8	175	18.9566	10.8286
Q0BIW6	Imidazole glycerol phosphate synthase subunit HisH OS=Burkholderia ambifaria (strain ATCC BAA-244 / AMMD) OX=339670 GN=hisH PE=3 SV=1 - [Q0BIW6_BURCM]	214.99	24.41	1	4	4	12	213	23.3918	6.68311
Q0BBK4	Carboxyl-terminal protease OS=Burkholderia ambifaria (strain ATCC BAA-244 / AMMD) OX=339670 GN=Bamb_2913 PE=3 SV=1 - [Q0BBK4_BURCM]	214.72	15.2	1	7	7	11	513	56.1863	9.02686
Q0B9Z3	Uncharacterized protein OS=Burkholderia ambifaria (strain ATCC BAA-244 / AMMD) OX=339670 GN=Bamb_3476 PE=4 SV=1 - [Q0B9Z3_BURCM]	214.31	25.47	1	4	4	7	161	17.4438	6.20166
Q0BE91	Thioredoxin OS=Burkholderia ambifaria (strain ATCC BAA-244 / AMMD) OX=339670 GN=Bamb_1976 PE=3 SV=1 - [Q0BE91_BURCM]	213.48	25.69	1	2	2	4	109	12.0483	5.0083
Q0B6Q2	Adenosine deaminase OS=Burkholderia ambifaria (strain ATCC BAA-244 / AMMD) OX=339670 GN=Bamb_4621 PE=1 SV=1 - [Q0B6Q2_BURCM]	213.44	15.3	1	4	4	6	366	40.9906	6.07471
Q0BEG8	Transcriptional regulator, BolA protein family OS=Burkholderia ambifaria (strain ATCC BAA-244 / AMMD) OX=339670 GN=Bamb_1899 PE=3 SV=1 - [Q0BEG8_BURCM]	213.2	50	1	4	4	7	102	10.7365	6.03662
Q0BIW8	Imidazoleglycerol-phosphate dehydratase OS=Burkholderia ambifaria (strain ATCC BAA-244 / AMMD) OX=339670 GN=hisB PE=3 SV=1 - [HIS7_BURCM]	213.16	44.1	1	7	7	13	195	21.4873	6.80029
Q0B124	Uncharacterized protein OS=Burkholderia ambifaria (strain ATCC BAA-244 / AMMD) OX=339670 GN=Bamb_6606 PE=4 SV=1 - [Q0B124_BURCM]	212.35	21.2	1	4	4	6	217	24.0374	8.45557
Q0BHR0	dTDP-4-dehydrorhamnose reductase OS=Burkholderia ambifaria (strain ATCC BAA-244 / AMMD) OX=339670 GN=Bamb_0754 PE=3 SV=1 - [Q0BHR0_BURCM]	210.78	27.52	1	5	5	8	298	32.0875	7.09326
Q0B5Z3	Aromatic ring-cleaving dioxygenase-like protein OS=Burkholderia ambifaria (strain ATCC BAA-244 / AMMD) OX=339670 GN=Bamb_4881 PE=4 SV=1 - [Q0B5Z3_BURCM]	210.23	64.1	1	6	6	11	117	13.2106	5.63037
Q0BI75	Glutathione S-transferase, N-terminal domain protein OS=Burkholderia ambifaria (strain ATCC BAA-244 / AMMD) OX=339670 GN=Bamb_0589 PE=4 SV=1 - [Q0BI75_BURCM]	210.11	25	1	4	4	8	204	22.7768	7.34229
Q0BC13	Glycine--tRNA ligase beta subunit OS=Burkholderia ambifaria (strain ATCC BAA-244 / AMMD) OX=339670 GN=glyS PE=3 SV=1 - [Q0BC13_BURCM]	209.48	15.02	1	6	6	8	699	75.9412	6.17627
Q0BG17	Thioesterase superfamily protein OS=Burkholderia ambifaria (strain ATCC BAA-244 / AMMD) OX=339670 GN=Bamb_1348 PE=4 SV=1 - [Q0BG17_BURCM]	209.24	35.66	1	4	4	7	143	15.9108	5.85889
Q0BE89	OsmC family protein OS=Burkholderia ambifaria (strain ATCC BAA-244 / AMMD) OX=339670 GN=Bamb_1978 PE=4 SV=1 - [Q0BE89_BURCM]	208.95	16.67	1	2	2	4	186	20.5684	5.12256
Q0B2X4	Alpha/beta hydrolase fold-3 domain protein OS=Burkholderia ambifaria (strain ATCC BAA-244 / AMMD) OX=339670 GN=Bamb_5954 PE=4 SV=1 - [Q0B2X4_BURCM]	208.77	29.65	1	7	7	12	344	36.4649	8.27979
Q0BEM9	Stress responsive alpha-beta barrel domain protein OS=Burkholderia ambifaria (strain ATCC BAA-244 / AMMD) OX=339670 GN=Bamb_1838 PE=4 SV=1 - [Q0BEM9_BURCM]	208.14	20.19	1	3	3	5	104	11.4319	5.8335
Q0BBA5	Alpha/beta hydrolase fold protein OS=Burkholderia ambifaria (strain ATCC BAA-244 / AMMD) OX=339670 GN=Bamb_3012 PE=4 SV=1 - [Q0BBA5_BURCM]	207.36	23.15	1	6	6	9	298	32.8864	6.72705
Q0BDL2	N-formylglutamate amidohydrolase OS=Burkholderia ambifaria (strain ATCC BAA-244 / AMMD) OX=339670 GN=Bamb_2205 PE=4 SV=1 - [Q0BDL2_BURCM]	206.75	36.23	1	4	4	8	265	29.2488	6.45557
Q0BFL8	Sulfate ABC transporter, periplasmic sulfate-binding protein OS=Burkholderia ambifaria (strain ATCC BAA-244 / AMMD) OX=339670 GN=Bamb_1497 PE=4 SV=1 - [Q0BFL8_BURCM]	206.62	10.43	1	2	2	4	345	37.3565	9.37842
Q0BAU4	7-carboxy-7-deazaguanine synthase OS=Burkholderia ambifaria (strain ATCC BAA-244 / AMMD) OX=339670 GN=queE PE=3 SV=1 - [Q0BAU4_BURCM]	206.19	37.14	1	7	7	10	210	23.2785	4.99561
Q0B4Y5	Aldehyde dehydrogenase OS=Burkholderia ambifaria (strain ATCC BAA-244 / AMMD) OX=339670 GN=Bamb_5240 PE=4 SV=1 - [Q0B4Y5_BURCM]	206.06	16.79	1	5	6	9	542	59.4025	6.27783
Q0BHM3	Coproporphyrinogen-III oxidase OS=Burkholderia ambifaria (strain ATCC BAA-244 / AMMD) OX=339670 GN=Bamb_0791 PE=3 SV=1 - [Q0BHM3_BURCM]	205.98	9.29	1	3	3	7	463	51.2891	6.96143
Q0BCZ8	Uncharacterized protein OS=Burkholderia ambifaria (strain ATCC BAA-244 / AMMD) OX=339670 GN=Bamb_2419 PE=4 SV=1 - [Q0BCZ8_BURCM]	205.38	29.89	1	3	3	5	184	20.7013	5.98584
Q0BJ36	50S ribosomal protein L14 OS=Burkholderia ambifaria (strain ATCC BAA-244 / AMMD) OX=339670 GN=rplN PE=3 SV=1 - [RL14_BURCM]	204.94	37.7	1	5	5	12	122	13.4294	10.272
Q0BDT0	PHP C-terminal domain protein OS=Burkholderia ambifaria (strain ATCC BAA-244 / AMMD) OX=339670 GN=Bamb_2137 PE=4 SV=1 - [Q0BDT0_BURCM]	204.94	52.54	1	9	9	13	276	29.9871	6.30322
Q0B7T0	Uncharacterized protein OS=Burkholderia ambifaria (strain ATCC BAA-244 / AMMD) OX=339670 GN=Bamb_4240 PE=4 SV=1 - [Q0B7T0_BURCM]	204.83	45.83	1	2	2	8	72	8.58827	7.06396
Q0BC41	Gamma-glutamyltransferase 2, Threonine peptidase, MEROPS family T03 OS=Burkholderia ambifaria (strain ATCC BAA-244 / AMMD) OX=339670 GN=Bamb_2726 PE=4 SV=1 - [Q0BC41_BURCM]	204.16	14.47	1	5	5	9	546	58.7104	6.53662
Q0BEF7	ATP-dependent Clp protease ATP-binding subunit ClpX OS=Burkholderia ambifaria (strain ATCC BAA-244 / AMMD) OX=339670 GN=clpX PE=3 SV=1 - [CLPX_BURCM]	202.34	14.89	1	6	6	9	423	46.3456	6.04932
Q0BD89	Alcohol dehydrogenase, zinc-binding domain protein OS=Burkholderia ambifaria (strain ATCC BAA-244 / AMMD) OX=339670 GN=Bamb_2328 PE=4 SV=1 - [Q0BD89_BURCM]	202.06	36.73	1	6	6	12	324	34.3638	7.02002
Q0BFR5	Ribose-5-phosphate isomerase A OS=Burkholderia ambifaria (strain ATCC BAA-244 / AMMD) OX=339670 GN=rpiA PE=3 SV=1 - [RPIA_BURCM]	201.93	27.83	1	5	5	8	230	23.8765	5.26221
Q0B126	Uncharacterized protein OS=Burkholderia ambifaria (strain ATCC BAA-244 / AMMD) OX=339670 GN=Bamb_6604 PE=4 SV=1 - [Q0B126_BURCM]	201.72	22.16	1	5	5	7	343	36.7467	5.2876
Q0B9U0	Uncharacterized protein OS=Burkholderia ambifaria (strain ATCC BAA-244 / AMMD) OX=339670 GN=Bamb_3529 PE=4 SV=1 - [Q0B9U0_BURCM]	201.5	42.54	1	3	3	6	134	15.1169	4.29736
Q0B9B9	ThiJ/PfpI domain protein OS=Burkholderia ambifaria (strain ATCC BAA-244 / AMMD) OX=339670 GN=Bamb_3700 PE=4 SV=1 - [Q0B9B9_BURCM]	200.49	46.49	1	6	6	10	228	24.1534	5.12256
Q0BHV0	Uncharacterized protein OS=Burkholderia ambifaria (strain ATCC BAA-244 / AMMD) OX=339670 GN=Bamb_0714 PE=4 SV=1 - [Q0BHV0_BURCM]	200.48	34.59	1	2	2	5	133	14.1692	5.73193
Q0BB40	Glutathione S-transferase, N-terminal domain protein OS=Burkholderia ambifaria (strain ATCC BAA-244 / AMMD) OX=339670 GN=Bamb_3077 PE=4 SV=1 - [Q0BB40_BURCM]	199.39	36.74	1	6	6	11	215	23.6548	5.41455
Q0BCL7	50S ribosomal protein L33 OS=Burkholderia ambifaria (strain ATCC BAA-244 / AMMD) OX=339670 GN=rpmG PE=3 SV=1 - [RL33_BURCM]	199.22	43.64	1	3	3	8	55	6.37744	10.1255
Q0BGW9	Phospholipase C OS=Burkholderia ambifaria (strain ATCC BAA-244 / AMMD) OX=339670 GN=Bamb_1045 PE=4 SV=1 - [Q0BGW9_BURCM]	199.19	12.75	1	5	5	9	714	78.4708	6.63916
Q0BIW5	1-(5-phosphoribosyl)-5-[(5-phosphoribosylamino)methylideneamino] imidazole-4-carboxamide isomerase OS=Burkholderia ambifaria (strain ATCC BAA-244 / AMMD) OX=339670 GN=hisA PE=3 SV=1 - [HIS4_BURCM]	197.94	38.65	1	5	5	10	251	26.5246	4.57666
Q0BDT6	NlpBDapX family lipoprotein OS=Burkholderia ambifaria (strain ATCC BAA-244 / AMMD) OX=339670 GN=Bamb_2131 PE=4 SV=1 - [Q0BDT6_BURCM]	197.66	6.05	1	2	2	4	380	41.1719	7.43018
Q0BJV9	DNA gyrase subunit B OS=Burkholderia ambifaria (strain ATCC BAA-244 / AMMD) OX=339670 GN=gyrB PE=3 SV=1 - [Q0BJV9_BURCM]	196.89	20.63	1	9	9	11	824	90.9895	6.3667
Q0BIA9	6-phosphogluconate dehydratase OS=Burkholderia ambifaria (strain ATCC BAA-244 / AMMD) OX=339670 GN=Bamb_0555 PE=3 SV=1 - [Q0BIA9_BURCM]	196.64	12.62	1	4	4	8	618	65.1947	6.56592
Q0B672	Activator of Hsp90 ATPase 1 family protein OS=Burkholderia ambifaria (strain ATCC BAA-244 / AMMD) OX=339670 GN=Bamb_4802 PE=4 SV=1 - [Q0B672_BURCM]	196.57	23.6	1	2	2	4	161	18.1699	6.01123
Q0BHG0	Uncharacterized protein OS=Burkholderia ambifaria (strain ATCC BAA-244 / AMMD) OX=339670 GN=Bamb_0854 PE=4 SV=1 - [Q0BHG0_BURCM]	195.97	45.86	1	4	4	7	133	14.0961	6.52197
Q0B628	Ureidoglycolate lyase OS=Burkholderia ambifaria (strain ATCC BAA-244 / AMMD) OX=339670 GN=Bamb_4846 PE=3 SV=1 - [UGL_BURCM]	195.46	33.69	1	5	6	10	282	30.2174	5.40186
Q0B6T7	Enoyl-CoA hydratase/isomerase OS=Burkholderia ambifaria (strain ATCC BAA-244 / AMMD) OX=339670 GN=Bamb_4586 PE=4 SV=1 - [Q0B6T7_BURCM]	195.31	22.99	1	4	4	7	261	27.8594	6.16357
Q0B1K0	Aspartate racemase OS=Burkholderia ambifaria (strain ATCC BAA-244 / AMMD) OX=339670 GN=Bamb_6429 PE=3 SV=1 - [Q0B1K0_BURCM]	195.23	19.23	1	3	3	5	234	25.6693	5.46533
Q0B204	Uncharacterized protein OS=Burkholderia ambifaria (strain ATCC BAA-244 / AMMD) OX=339670 GN=Bamb_6275 PE=4 SV=1 - [Q0B204_BURCM]	194.82	40	1	4	4	8	145	16.1457	4.43701
Q0BDQ7	Co-chaperone protein HscB homolog OS=Burkholderia ambifaria (strain ATCC BAA-244 / AMMD) OX=339670 GN=hscB PE=3 SV=1 - [Q0BDQ7_BURCM]	193.79	17.91	1	3	3	6	201	22.5366	5.71924
Q0BIZ3	Uncharacterized protein OS=Burkholderia ambifaria (strain ATCC BAA-244 / AMMD) OX=339670 GN=Bamb_0320 PE=4 SV=1 - [Q0BIZ3_BURCM]	192.94	45.99	1	8	8	14	237	27.4923	9.62744
Q0BHI8	6-phosphogluconolactonase OS=Burkholderia ambifaria (strain ATCC BAA-244 / AMMD) OX=339670 GN=Bamb_0826 PE=4 SV=1 - [Q0BHI8_BURCM]	192.79	45.58	1	5	6	8	226	23.9863	5.87158
Q0BFQ4	Enoyl-CoA hydratase/isomerase OS=Burkholderia ambifaria (strain ATCC BAA-244 / AMMD) OX=339670 GN=Bamb_1461 PE=4 SV=1 - [Q0BFQ4_BURCM]	192.53	30.23	1	7	7	11	387	41.6319	5.77002
Q0BCF2	UBA/THIF-type NAD/FAD binding protein OS=Burkholderia ambifaria (strain ATCC BAA-244 / AMMD) OX=339670 GN=Bamb_2615 PE=4 SV=1 - [Q0BCF2_BURCM]	192.43	29.82	1	6	6	10	285	29.7233	5.68115
Q0B591	5'-nucleotidase SurE OS=Burkholderia ambifaria (strain ATCC BAA-244 / AMMD) OX=339670 GN=surE PE=3 SV=1 - [Q0B591_BURCM]	191.83	17.22	1	3	3	4	273	29.7472	6.354
Q0BJQ1	Transcriptional regulator, MarR family OS=Burkholderia ambifaria (strain ATCC BAA-244 / AMMD) OX=339670 GN=Bamb_0061 PE=4 SV=1 - [Q0BJQ1_BURCM]	191.3	35.38	1	5	5	8	212	22.946	9.43701
Q0BFF9	Cobalamin biosynthesis protein CobW OS=Burkholderia ambifaria (strain ATCC BAA-244 / AMMD) OX=339670 GN=Bamb_1556 PE=4 SV=1 - [Q0BFF9_BURCM]	191.05	23.48	1	5	5	6	362	39.3057	4.89404
Q0BC00	Thioesterase superfamily protein OS=Burkholderia ambifaria (strain ATCC BAA-244 / AMMD) OX=339670 GN=Bamb_2767 PE=4 SV=1 - [Q0BC00_BURCM]	190.51	19.85	1	2	2	3	136	14.6967	9.18799
Q0BHE7	Chorismate mutase OS=Burkholderia ambifaria (strain ATCC BAA-244 / AMMD) OX=339670 GN=Bamb_0867 PE=4 SV=1 - [Q0BHE7_BURCM]	190.14	37.56	1	6	6	11	197	20.7839	8.93896
Q0B915	UDP-N-acetylglucosamine 1-carboxyvinyltransferase OS=Burkholderia ambifaria (strain ATCC BAA-244 / AMMD) OX=339670 GN=Bamb_3804 PE=4 SV=1 - [Q0B915_BURCM]	190.1	12.36	1	4	4	5	445	48.5902	6.87354
Q0BJA5	Uncharacterized protein OS=Burkholderia ambifaria (strain ATCC BAA-244 / AMMD) OX=339670 GN=Bamb_0208 PE=4 SV=1 - [Q0BJA5_BURCM]	189.9	14.42	1	2	2	5	208	22.7133	7.88428
Q0BCY7	Short-chain dehydrogenase/reductase SDR OS=Burkholderia ambifaria (strain ATCC BAA-244 / AMMD) OX=339670 GN=Bamb_2430 PE=3 SV=1 - [Q0BCY7_BURCM]	188.63	29.27	1	4	5	7	246	24.8379	6.55127
Q0B5X5	Uncharacterized protein OS=Burkholderia ambifaria (strain ATCC BAA-244 / AMMD) OX=339670 GN=Bamb_4899 PE=4 SV=1 - [Q0B5X5_BURCM]	188.62	30.25	1	3	3	6	162	18.1371	9.0415
Q0B5L9	Aldo/keto reductase OS=Burkholderia ambifaria (strain ATCC BAA-244 / AMMD) OX=339670 GN=Bamb_5005 PE=4 SV=1 - [Q0B5L9_BURCM]	188.26	26.98	1	6	6	9	315	34.0038	5.2749
Q0BCB1	Efflux transporter, RND family, MFP subunit OS=Burkholderia ambifaria (strain ATCC BAA-244 / AMMD) OX=339670 GN=Bamb_2656 PE=3 SV=1 - [Q0BCB1_BURCM]	187.92	6.48	1	2	2	4	432	43.8552	9.40771
Q0B2X3	OsmC family protein OS=Burkholderia ambifaria (strain ATCC BAA-244 / AMMD) OX=339670 GN=Bamb_5955 PE=4 SV=1 - [Q0B2X3_BURCM]	186.24	40.43	1	4	4	7	141	14.5686	6.53662
Q0BDB4	Acetolactate synthase OS=Burkholderia ambifaria (strain ATCC BAA-244 / AMMD) OX=339670 GN=Bamb_2303 PE=3 SV=1 - [Q0BDB4_BURCM]	185.84	20.1	1	6	6	9	587	64.8958	6.13818
Q0BHE3	Uncharacterized protein OS=Burkholderia ambifaria (strain ATCC BAA-244 / AMMD) OX=339670 GN=Bamb_0871 PE=4 SV=1 - [Q0BHE3_BURCM]	185.84	28.88	1	8	8	10	419	44.9774	6.87354
Q0B957	Uncharacterized protein OS=Burkholderia ambifaria (strain ATCC BAA-244 / AMMD) OX=339670 GN=Bamb_3762 PE=4 SV=1 - [Q0B957_BURCM]	185.77	36.71	1	3	3	10	79	8.99422	6.15088
Q0BI09	Phosphoribosylformylglycinamidine cyclo-ligase OS=Burkholderia ambifaria (strain ATCC BAA-244 / AMMD) OX=339670 GN=purM PE=3 SV=1 - [PUR5_BURCM]	183.85	21.65	1	6	6	11	351	36.805	5.33838
Q0BH07	Glutaredoxin 2 OS=Burkholderia ambifaria (strain ATCC BAA-244 / AMMD) OX=339670 GN=Bamb_1007 PE=4 SV=1 - [Q0BH07_BURCM]	183.81	57.69	1	3	3	6	78	8.74931	4.99561
Q0BBY3	Uncharacterized protein OS=Burkholderia ambifaria (strain ATCC BAA-244 / AMMD) OX=339670 GN=Bamb_2784 PE=4 SV=1 - [Q0BBY3_BURCM]	183.42	45.26	1	5	5	8	137	15.0004	5.97314
Q0B6N7	Uncharacterized protein OS=Burkholderia ambifaria (strain ATCC BAA-244 / AMMD) OX=339670 GN=Bamb_4636 PE=4 SV=1 - [Q0B6N7_BURCM]	183.08	44.26	1	2	2	4	61	7.01748	4.65283
Q0BGY6	Putative GAF sensor protein OS=Burkholderia ambifaria (strain ATCC BAA-244 / AMMD) OX=339670 GN=Bamb_1028 PE=4 SV=1 - [Q0BGY6_BURCM]	181.98	20.36	1	3	3	6	167	18.171	4.97021
Q0B5S3	Squalene-hopene cyclase OS=Burkholderia ambifaria (strain ATCC BAA-244 / AMMD) OX=339670 GN=Bamb_4951 PE=4 SV=1 - [Q0B5S3_BURCM]	181.26	15.83	1	9	9	12	657	73.2919	6.04932
Q0BEU6	50S ribosomal protein L31 type B OS=Burkholderia ambifaria (strain ATCC BAA-244 / AMMD) OX=339670 GN=rpmE2 PE=3 SV=1 - [RL31B_BURCM]	180.8	41.38	1	3	3	8	87	9.91307	9.64209
Q0BJA8	Transport-associated protein OS=Burkholderia ambifaria (strain ATCC BAA-244 / AMMD) OX=339670 GN=Bamb_0204 PE=4 SV=1 - [Q0BJA8_BURCM]	180.03	25.28	1	4	4	6	265	27.3404	8.6167
Q0B451	OsmC family protein OS=Burkholderia ambifaria (strain ATCC BAA-244 / AMMD) OX=339670 GN=Bamb_5525 PE=4 SV=1 - [Q0B451_BURCM]	179.99	29.32	1	4	4	7	133	14.5695	6.93213
Q0B8J1	Glucose-methanol-choline oxidoreductase OS=Burkholderia ambifaria (strain ATCC BAA-244 / AMMD) OX=339670 GN=Bamb_3978 PE=4 SV=1 - [Q0B8J1_BURCM]	179.98	26.9	1	9	9	12	539	59.5338	6.88818
Q0BBW9	CHRD domain containing protein OS=Burkholderia ambifaria (strain ATCC BAA-244 / AMMD) OX=339670 GN=Bamb_2798 PE=4 SV=1 - [Q0BBW9_BURCM]	179.67	38.19	1	5	5	13	144	15.0516	6.88818
Q0B2V2	Metal dependent phosphohydrolase OS=Burkholderia ambifaria (strain ATCC BAA-244 / AMMD) OX=339670 GN=Bamb_5977 PE=4 SV=1 - [Q0B2V2_BURCM]	179.34	31.61	1	4	4	6	174	19.6622	5.85889
Q0BDV3	Tetratricopeptide TPR_2 repeat protein OS=Burkholderia ambifaria (strain ATCC BAA-244 / AMMD) OX=339670 GN=Bamb_2114 PE=4 SV=1 - [Q0BDV3_BURCM]	178.76	17.53	1	2	2	4	251	26.7639	9.78857
Q0BI52	Queuine tRNA-ribosyltransferase OS=Burkholderia ambifaria (strain ATCC BAA-244 / AMMD) OX=339670 GN=tgt PE=3 SV=1 - [Q0BI52_BURCM]	177.56	25.32	1	5	5	6	395	43.855	6.65381
Q0BI87	Tyrosine--tRNA ligase OS=Burkholderia ambifaria (strain ATCC BAA-244 / AMMD) OX=339670 GN=tyrS PE=3 SV=1 - [Q0BI87_BURCM]	177.32	23.49	1	7	7	9	413	45.5587	6.29053
Q0B626	Uncharacterized protein OS=Burkholderia ambifaria (strain ATCC BAA-244 / AMMD) OX=339670 GN=Bamb_4848 PE=4 SV=1 - [Q0B626_BURCM]	176.54	34.43	1	5	5	6	183	20.4084	5.09717
Q0BA58	Antibiotic biosynthesis monooxygenase OS=Burkholderia ambifaria (strain ATCC BAA-244 / AMMD) OX=339670 GN=Bamb_3411 PE=4 SV=1 - [Q0BA58_BURCM]	176.3	33.33	1	3	3	6	111	12.5034	5.45264
Q0BE98	Uncharacterized protein OS=Burkholderia ambifaria (strain ATCC BAA-244 / AMMD) OX=339670 GN=Bamb_1969 PE=4 SV=1 - [Q0BE98_BURCM]	176.19	26.27	1	6	6	10	316	35.9449	6.44287
Q0BHH1	Probable septum site-determining protein MinC OS=Burkholderia ambifaria (strain ATCC BAA-244 / AMMD) OX=339670 GN=minC PE=3 SV=1 - [MINC_BURCM]	176.08	18.5	1	5	5	9	254	27.3925	5.2749
Q0BGY7	Methionine aminopeptidase OS=Burkholderia ambifaria (strain ATCC BAA-244 / AMMD) OX=339670 GN=map PE=3 SV=1 - [Q0BGY7_BURCM]	175.78	25	1	4	4	6	268	29.2037	6.39209
Q0BG51	SirA family protein OS=Burkholderia ambifaria (strain ATCC BAA-244 / AMMD) OX=339670 GN=Bamb_1314 PE=3 SV=1 - [Q0BG51_BURCM]	174.98	80	1	6	6	9	75	8.41044	9.37842
Q0BCR1	Cell division protein ZapA OS=Burkholderia ambifaria (strain ATCC BAA-244 / AMMD) OX=339670 GN=Bamb_2506 PE=4 SV=1 - [Q0BCR1_BURCM]	173.9	38.46	1	3	3	5	104	11.3998	6.29053
Q0BG99	Pirin domain protein OS=Burkholderia ambifaria (strain ATCC BAA-244 / AMMD) OX=339670 GN=Bamb_1266 PE=3 SV=1 - [Q0BG99_BURCM]	173.77	15.99	1	4	4	7	294	31.387	5.71924
Q0BES3	Uncharacterized protein OS=Burkholderia ambifaria (strain ATCC BAA-244 / AMMD) OX=339670 GN=Bamb_1794 PE=4 SV=1 - [Q0BES3_BURCM]	173.64	35.67	1	4	4	6	171	18.805	10.0815
Q0BEH9	HvnB halovibrin OS=Burkholderia ambifaria (strain ATCC BAA-244 / AMMD) OX=339670 GN=Bamb_1888 PE=4 SV=1 - [Q0BEH9_BURCM]	173.08	20.71	1	4	4	7	309	33.9593	5.43994
Q0B632	2-methylisocitrate lyase OS=Burkholderia ambifaria (strain ATCC BAA-244 / AMMD) OX=339670 GN=prpB PE=3 SV=1 - [Q0B632_BURCM]	172.94	26.94	1	4	4	8	297	32.0814	5.57959
Q0B8A6	Cold-shock DNA-binding protein family OS=Burkholderia ambifaria (strain ATCC BAA-244 / AMMD) OX=339670 GN=Bamb_4064 PE=4 SV=1 - [Q0B8A6_BURCM]	172.8	43.28	1	1	2	6	67	7.34268	5.97314
Q0BIT4	Tetratricopeptide TPR_2 repeat protein OS=Burkholderia ambifaria (strain ATCC BAA-244 / AMMD) OX=339670 GN=Bamb_0380 PE=4 SV=1 - [Q0BIT4_BURCM]	172.78	33.49	1	4	4	9	212	22.0395	9.29053
Q0BJL8	ATP synthase subunit delta OS=Burkholderia ambifaria (strain ATCC BAA-244 / AMMD) OX=339670 GN=atpH PE=3 SV=1 - [ATPD_BURCM]	172.22	58.66	1	6	6	9	179	19.0212	5.09717
Q0BCG5	UDP-N-acetylenolpyruvoylglucosamine reductase OS=Burkholderia ambifaria (strain ATCC BAA-244 / AMMD) OX=339670 GN=murB PE=3 SV=1 - [MURB_BURCM]	171.66	21.49	1	7	7	12	349	37.7556	6.7417
Q0BAV3	Aspartyl/glutamyl-tRNA(Asn/Gln) amidotransferase subunit C OS=Burkholderia ambifaria (strain ATCC BAA-244 / AMMD) OX=339670 GN=gatC PE=3 SV=1 - [GATC_BURCM]	171.57	31.31	1	2	2	5	99	10.9496	4.66553
Q0BAS8	Uncharacterized protein OS=Burkholderia ambifaria (strain ATCC BAA-244 / AMMD) OX=339670 GN=Bamb_3189 PE=4 SV=1 - [Q0BAS8_BURCM]	171.45	36.57	1	4	4	7	134	14.5645	5.93506
Q0B8U6	Trehalose-6-phosphate synthase OS=Burkholderia ambifaria (strain ATCC BAA-244 / AMMD) OX=339670 GN=Bamb_3873 PE=3 SV=1 - [Q0B8U6_BURCM]	171.16	11.66	1	3	3	5	489	54.9812	6.3667
Q0BBD9	Uncharacterized protein OS=Burkholderia ambifaria (strain ATCC BAA-244 / AMMD) OX=339670 GN=Bamb_2978 PE=4 SV=1 - [Q0BBD9_BURCM]	171.14	39.31	1	5	5	7	145	16.0008	7.34229
Q0BCV3	Short-chain dehydrogenase/reductase SDR OS=Burkholderia ambifaria (strain ATCC BAA-244 / AMMD) OX=339670 GN=Bamb_2464 PE=4 SV=1 - [Q0BCV3_BURCM]	170.18	50.4	1	8	8	10	252	26.6125	5.46533
Q0B2J8	Uncharacterized protein OS=Burkholderia ambifaria (strain ATCC BAA-244 / AMMD) OX=339670 GN=Bamb_6081 PE=4 SV=1 - [Q0B2J8_BURCM]	170.05	37.5	1	3	3	6	152	16.9385	6.37939
Q0BI16	Anthranilate synthase component I and chorismate binding protein OS=Burkholderia ambifaria (strain ATCC BAA-244 / AMMD) OX=339670 GN=Bamb_0648 PE=4 SV=1 - [Q0BI16_BURCM]	170.03	14.71	1	4	5	8	639	68.5769	5.96045
Q0BIW2	Phosphoribosyl-ATP pyrophosphatase OS=Burkholderia ambifaria (strain ATCC BAA-244 / AMMD) OX=339670 GN=hisE PE=3 SV=1 - [HIS2_BURCM]	169.7	28.93	1	4	4	6	121	13.2658	5.19873
Q0B6N5	NH(3)-dependent NAD(+) synthetase OS=Burkholderia ambifaria (strain ATCC BAA-244 / AMMD) OX=339670 GN=nadE PE=3 SV=1 - [Q0B6N5_BURCM]	168.83	23.73	1	5	5	7	295	32.0693	5.69385
Q0BDZ4	Hydroxymethylpyrimidine kinase / phosphomethylpyrimidine kinase OS=Burkholderia ambifaria (strain ATCC BAA-244 / AMMD) OX=339670 GN=Bamb_2073 PE=4 SV=1 - [Q0BDZ4_BURCM]	167.96	35.69	1	4	4	7	269	27.5423	6.37939
Q0BAY2	Cobalamin synthesis protein, P47K OS=Burkholderia ambifaria (strain ATCC BAA-244 / AMMD) OX=339670 GN=Bamb_3135 PE=4 SV=1 - [Q0BAY2_BURCM]	167.67	13.14	1	3	3	6	388	43.1996	5.8335
Q0BCL4	Quinolinate synthase A OS=Burkholderia ambifaria (strain ATCC BAA-244 / AMMD) OX=339670 GN=nadA PE=3 SV=1 - [NADA_BURCM]	167.38	14.02	1	4	4	9	378	40.5296	5.90967
Q0BJ51	30S ribosomal protein S12 OS=Burkholderia ambifaria (strain ATCC BAA-244 / AMMD) OX=339670 GN=rpsL PE=3 SV=1 - [RS12_BURCM]	166.8	14.29	1	2	2	4	126	13.9906	10.9019
Q0BAF0	Glyoxalase/bleomycin resistance protein/dioxygenase OS=Burkholderia ambifaria (strain ATCC BAA-244 / AMMD) OX=339670 GN=Bamb_3318 PE=4 SV=1 - [Q0BAF0_BURCM]	166.28	38.76	1	4	4	9	129	14.4709	6.85889
Q0BAN1	Uncharacterized protein OS=Burkholderia ambifaria (strain ATCC BAA-244 / AMMD) OX=339670 GN=Bamb_3236 PE=4 SV=1 - [Q0BAN1_BURCM]	166.23	45.93	1	5	5	7	135	14.4524	9.34912
Q0B122	Transfer origin protein, TraL OS=Burkholderia ambifaria (strain ATCC BAA-244 / AMMD) OX=339670 GN=Bamb_6608 PE=4 SV=1 - [Q0B122_BURCM]	165.7	17.01	1	3	3	6	241	26.3386	5.84619
Q0BDE7	Acyl-CoA dehydrogenase domain protein OS=Burkholderia ambifaria (strain ATCC BAA-244 / AMMD) OX=339670 GN=Bamb_2270 PE=3 SV=1 - [Q0BDE7_BURCM]	165.55	19.35	1	6	6	8	398	44.2595	5.96045
Q0BBK1	Phosphocarrier, HPr family OS=Burkholderia ambifaria (strain ATCC BAA-244 / AMMD) OX=339670 GN=Bamb_2916 PE=4 SV=1 - [Q0BBK1_BURCM]	164.86	30.34	1	2	2	5	89	9.61394	7.25439
Q0BGZ9	Beta-hexosaminidase OS=Burkholderia ambifaria (strain ATCC BAA-244 / AMMD) OX=339670 GN=nagZ PE=3 SV=1 - [Q0BGZ9_BURCM]	164.78	19.3	1	4	4	7	342	37.0524	7.59131
Q0BCL8	50S ribosomal protein L28 OS=Burkholderia ambifaria (strain ATCC BAA-244 / AMMD) OX=339670 GN=rpmB PE=3 SV=1 - [RL28_BURCM]	164.45	44.16	1	4	4	5	77	8.75562	11.5903
Q0BAL8	1-deoxy-D-xylulose-5-phosphate synthase OS=Burkholderia ambifaria (strain ATCC BAA-244 / AMMD) OX=339670 GN=dxs PE=3 SV=1 - [DXS_BURCM]	164	12.38	1	6	6	9	646	69.9737	6.16357
Q0BJ00	Deoxyguanosinetriphosphate triphosphohydrolase-like protein OS=Burkholderia ambifaria (strain ATCC BAA-244 / AMMD) OX=339670 GN=Bamb_0313 PE=3 SV=1 - [Q0BJ00_BURCM]	163.8	10.2	1	3	3	7	402	45.1852	6.78564
Q0BDQ5	Iron-sulfur cluster assembly scaffold protein IscU OS=Burkholderia ambifaria (strain ATCC BAA-244 / AMMD) OX=339670 GN=Bamb_2162 PE=3 SV=1 - [Q0BDQ5_BURCM]	162.95	40.74	1	4	4	9	135	14.3071	5.31299
Q0BCE2	Kynurenine formamidase OS=Burkholderia ambifaria (strain ATCC BAA-244 / AMMD) OX=339670 GN=kynB PE=3 SV=1 - [KYNB_BURCM]	162.83	49.3	1	5	5	7	213	22.6516	5.51611
Q0BB67	Glutathione reductase OS=Burkholderia ambifaria (strain ATCC BAA-244 / AMMD) OX=339670 GN=Bamb_3050 PE=3 SV=1 - [Q0BB67_BURCM]	162.39	18.18	1	6	6	9	451	48.2191	6.7417
Q0B633	Citrate synthase OS=Burkholderia ambifaria (strain ATCC BAA-244 / AMMD) OX=339670 GN=Bamb_4841 PE=3 SV=1 - [Q0B633_BURCM]	162.3	32.82	1	7	7	9	390	42.7037	7.00537
Q0BEB2	Murein tetrapeptidase LD-carboxypeptidase, Serine peptidase, MEROPS family S66 OS=Burkholderia ambifaria (strain ATCC BAA-244 / AMMD) OX=339670 GN=Bamb_1955 PE=4 SV=1 - [Q0BEB2_BURCM]	162.22	30.77	1	7	7	12	312	34.2316	6.27783
Q0BAE5	Glutathione S-transferase, C-terminal domain protein OS=Burkholderia ambifaria (strain ATCC BAA-244 / AMMD) OX=339670 GN=Bamb_3323 PE=4 SV=1 - [Q0BAE5_BURCM]	161.64	17.84	1	4	4	6	241	27.2969	6.45557
Q0BEZ5	Ribosomal protein S12 methylthiotransferase RimO OS=Burkholderia ambifaria (strain ATCC BAA-244 / AMMD) OX=339670 GN=rimO PE=3 SV=1 - [RIMO_BURCM]	161.45	19.43	1	5	5	7	453	49.4303	5.40186
Q0B541	Efflux transporter, RND family, MFP subunit OS=Burkholderia ambifaria (strain ATCC BAA-244 / AMMD) OX=339670 GN=Bamb_5183 PE=4 SV=1 - [Q0B541_BURCM]	161.25	32.23	1	3	3	6	121	12.3263	9.08545
Q0BID1	Guanine-specific ribonuclease N1 and T1 OS=Burkholderia ambifaria (strain ATCC BAA-244 / AMMD) OX=339670 GN=Bamb_0533 PE=4 SV=1 - [Q0BID1_BURCM]	161.22	23.78	1	2	2	4	143	15.6711	9.99365
Q0BCT7	dCTP deaminase OS=Burkholderia ambifaria (strain ATCC BAA-244 / AMMD) OX=339670 GN=dcd PE=3 SV=1 - [DCD_BURCM]	161.08	20.11	1	3	3	6	189	21.3426	5.2749
Q0BIM2	Protein ApaG OS=Burkholderia ambifaria (strain ATCC BAA-244 / AMMD) OX=339670 GN=apaG PE=3 SV=1 - [Q0BIM2_BURCM]	160.35	41.13	1	4	4	6	124	14.059	5.97314
Q0BDL0	Imidazolonepropionase OS=Burkholderia ambifaria (strain ATCC BAA-244 / AMMD) OX=339670 GN=hutI PE=3 SV=1 - [HUTI_BURCM]	159.86	21.87	1	6	6	8	407	44.1426	6.13818
Q0BIK0	UDP-N-acetylmuramate--L-alanine ligase OS=Burkholderia ambifaria (strain ATCC BAA-244 / AMMD) OX=339670 GN=murC PE=3 SV=1 - [MURC_BURCM]	159.59	14.19	1	5	5	8	465	48.9484	6.01123
Q0B5K4	3-oxoadipate enol-lactonase OS=Burkholderia ambifaria (strain ATCC BAA-244 / AMMD) OX=339670 GN=Bamb_5020 PE=4 SV=1 - [Q0B5K4_BURCM]	159.42	32.18	1	5	5	6	261	28.1333	6.44287
Q0BCX0	Uncharacterized protein OS=Burkholderia ambifaria (strain ATCC BAA-244 / AMMD) OX=339670 GN=Bamb_2447 PE=4 SV=1 - [Q0BCX0_BURCM]	159.19	18.58	1	2	2	4	183	20.4741	9.78857
Q0B8W3	Succinylglutamate desuccinylase/aspartoacylase OS=Burkholderia ambifaria (strain ATCC BAA-244 / AMMD) OX=339670 GN=Bamb_3856 PE=4 SV=1 - [Q0B8W3_BURCM]	158.46	24.65	1	5	6	10	357	38.3825	6.18896
Q0BIR4	Uncharacterized protein OS=Burkholderia ambifaria (strain ATCC BAA-244 / AMMD) OX=339670 GN=Bamb_0400 PE=4 SV=1 - [Q0BIR4_BURCM]	157.66	40.91	1	4	4	6	110	12.2642	8.93896
Q0BHJ6	3,4-dihydroxy-2-butanone 4-phosphate synthase OS=Burkholderia ambifaria (strain ATCC BAA-244 / AMMD) OX=339670 GN=ribB PE=3 SV=1 - [Q0BHJ6_BURCM]	157.37	11.58	1	4	4	5	380	41.1101	5.87158
Q0B4Y1	Transport-associated protein OS=Burkholderia ambifaria (strain ATCC BAA-244 / AMMD) OX=339670 GN=Bamb_5244 PE=4 SV=1 - [Q0B4Y1_BURCM]	157.36	32.76	1	3	3	7	116	12.0166	9.77393
Q0B2L9	Uncharacterized protein OS=Burkholderia ambifaria (strain ATCC BAA-244 / AMMD) OX=339670 GN=Bamb_6060 PE=4 SV=1 - [Q0B2L9_BURCM]	156.75	29.68	1	5	5	7	219	24.4389	6.56592
Q0BII0	50S ribosomal protein L21 OS=Burkholderia ambifaria (strain ATCC BAA-244 / AMMD) OX=339670 GN=rplU PE=3 SV=1 - [RL21_BURCM]	156.64	46.6	1	4	4	7	103	11.3491	9.81787
Q0B4J3	Uncharacterized protein OS=Burkholderia ambifaria (strain ATCC BAA-244 / AMMD) OX=339670 GN=Bamb_5383 PE=4 SV=1 - [Q0B4J3_BURCM]	156.45	20.47	1	2	2	4	127	13.93	5.5415
Q0B1S8	Haloacid dehalogenase, type II OS=Burkholderia ambifaria (strain ATCC BAA-244 / AMMD) OX=339670 GN=Bamb_6351 PE=4 SV=1 - [Q0B1S8_BURCM]	155.99	28.83	1	4	4	8	222	25.1775	6.63916
Q0BJM6	Chromosome segregation ATPase OS=Burkholderia ambifaria (strain ATCC BAA-244 / AMMD) OX=339670 GN=Bamb_0086 PE=4 SV=1 - [Q0BJM6_BURCM]	155.84	24.32	1	4	4	7	259	28.1995	5.23682
Q0BCP6	Sulfate adenylyltransferase subunit 2 OS=Burkholderia ambifaria (strain ATCC BAA-244 / AMMD) OX=339670 GN=Bamb_2521 PE=4 SV=1 - [Q0BCP6_BURCM]	155.74	11.56	1	3	3	4	320	36.1004	5.70654
Q0BJ40	30S ribosomal protein S3 OS=Burkholderia ambifaria (strain ATCC BAA-244 / AMMD) OX=339670 GN=rpsC PE=3 SV=1 - [RS3_BURCM]	155.05	26.69	1	5	5	9	266	29.9159	10.4917
Q0BEB7	Uncharacterized protein OS=Burkholderia ambifaria (strain ATCC BAA-244 / AMMD) OX=339670 GN=Bamb_1950 PE=4 SV=1 - [Q0BEB7_BURCM]	154.75	24.28	1	4	4	7	173	19.2147	5.8335
Q0B578	Oxidoreductase, molybdopterin binding protein OS=Burkholderia ambifaria (strain ATCC BAA-244 / AMMD) OX=339670 GN=Bamb_5146 PE=4 SV=1 - [Q0B578_BURCM]	154.36	23.49	1	3	3	5	166	18.2944	8.104
Q0B5T8	2-nitropropane dioxygenase, NPD OS=Burkholderia ambifaria (strain ATCC BAA-244 / AMMD) OX=339670 GN=Bamb_4936 PE=4 SV=1 - [Q0B5T8_BURCM]	153.23	20.33	1	6	6	9	492	52.2352	5.5542
Q0B8I9	Alpha-2-macroglobulin domain protein OS=Burkholderia ambifaria (strain ATCC BAA-244 / AMMD) OX=339670 GN=Bamb_3980 PE=4 SV=1 - [Q0B8I9_BURCM]	153	6.16	1	9	10	12	2013	217.223	7.73779
Q0BDE8	Acyl-CoA dehydrogenase domain protein OS=Burkholderia ambifaria (strain ATCC BAA-244 / AMMD) OX=339670 GN=Bamb_2269 PE=3 SV=1 - [Q0BDE8_BURCM]	152.64	8.75	1	2	2	5	377	40.2276	5.80811
Q0BAU5	Uncharacterized protein OS=Burkholderia ambifaria (strain ATCC BAA-244 / AMMD) OX=339670 GN=Bamb_3172 PE=4 SV=1 - [Q0BAU5_BURCM]	152.32	27.33	1	4	4	5	150	17.3098	6.13818
Q0BCH0	Short-chain dehydrogenase/reductase SDR OS=Burkholderia ambifaria (strain ATCC BAA-244 / AMMD) OX=339670 GN=Bamb_2597 PE=3 SV=1 - [Q0BCH0_BURCM]	152.18	22.62	1	3	3	5	252	25.6403	7.15186
Q0BD48	Cytochrome c, class I OS=Burkholderia ambifaria (strain ATCC BAA-244 / AMMD) OX=339670 GN=Bamb_2369 PE=4 SV=1 - [Q0BD48_BURCM]	151.85	29.41	1	4	4	6	119	12.8635	8.01611
Q0BJ19	50S ribosomal protein L17 OS=Burkholderia ambifaria (strain ATCC BAA-244 / AMMD) OX=339670 GN=rplQ PE=3 SV=1 - [RL17_BURCM]	151.8	14.5	1	3	3	6	131	15.0402	10.6675
Q0B2H2	Dihydrodipicolinate synthetase OS=Burkholderia ambifaria (strain ATCC BAA-244 / AMMD) OX=339670 GN=Bamb_6107 PE=3 SV=1 - [Q0B2H2_BURCM]	151.66	9.27	1	3	3	5	313	33.6891	6.93213
Q0BIT2	Uncharacterized protein OS=Burkholderia ambifaria (strain ATCC BAA-244 / AMMD) OX=339670 GN=Bamb_0382 PE=4 SV=1 - [Q0BIT2_BURCM]	151.08	28.02	1	8	8	10	496	54.8366	5.37646
Q0B6Z8	DGPFAETKE family protein OS=Burkholderia ambifaria (strain ATCC BAA-244 / AMMD) OX=339670 GN=Bamb_4525 PE=4 SV=1 - [Q0B6Z8_BURCM]	150.84	25.17	1	2	2	5	143	15.9829	4.99561
Q0BG80	L-carnitine dehydratase/bile acid-inducible protein F OS=Burkholderia ambifaria (strain ATCC BAA-244 / AMMD) OX=339670 GN=Bamb_1285 PE=4 SV=1 - [Q0BG80_BURCM]	150.72	11.03	1	3	3	6	426	45.6613	6.27783
Q0BCU9	Porphobilinogen deaminase OS=Burkholderia ambifaria (strain ATCC BAA-244 / AMMD) OX=339670 GN=hemC PE=3 SV=1 - [HEM3_BURCM]	150.2	27.74	1	4	4	7	328	34.6911	5.59229
Q0BIB9	Outer membrane protein assembly factor BamE OS=Burkholderia ambifaria (strain ATCC BAA-244 / AMMD) OX=339670 GN=bamE PE=3 SV=1 - [Q0BIB9_BURCM]	150.14	18.87	1	3	3	6	265	27.2297	8.1626
Q0BDA5	Cytokinin riboside 5'-monophosphate phosphoribohydrolase OS=Burkholderia ambifaria (strain ATCC BAA-244 / AMMD) OX=339670 GN=Bamb_2312 PE=3 SV=1 - [Q0BDA5_BURCM]	150.13	19.07	1	2	2	4	194	21.1137	5.57959
Q0BBU2	Phasin family protein OS=Burkholderia ambifaria (strain ATCC BAA-244 / AMMD) OX=339670 GN=Bamb_2825 PE=4 SV=1 - [Q0BBU2_BURCM]	150.06	32.12	1	3	3	5	193	19.9281	5.60498
Q0B8F9	Uncharacterized protein OS=Burkholderia ambifaria (strain ATCC BAA-244 / AMMD) OX=339670 GN=Bamb_4011 PE=4 SV=1 - [Q0B8F9_BURCM]	149.89	29.09	1	2	2	5	110	11.3037	8.76318
Q0BF02	Uncharacterized protein OS=Burkholderia ambifaria (strain ATCC BAA-244 / AMMD) OX=339670 GN=Bamb_1715 PE=4 SV=1 - [Q0BF02_BURCM]	148.49	28.44	1	4	4	6	218	23.1848	10.4185
Q0BIC8	Glyoxalase/bleomycin resistance protein/dioxygenase OS=Burkholderia ambifaria (strain ATCC BAA-244 / AMMD) OX=339670 GN=Bamb_0536 PE=4 SV=1 - [Q0BIC8_BURCM]	148.33	28.26	1	3	3	6	138	15.3484	4.81787
Q0BAM6	Cytokinin riboside 5'-monophosphate phosphoribohydrolase OS=Burkholderia ambifaria (strain ATCC BAA-244 / AMMD) OX=339670 GN=Bamb_3242 PE=3 SV=1 - [Q0BAM6_BURCM]	147.76	23.81	1	3	3	7	252	27.9293	5.68115
Q0B2J9	Uncharacterized protein OS=Burkholderia ambifaria (strain ATCC BAA-244 / AMMD) OX=339670 GN=Bamb_6080 PE=4 SV=1 - [Q0B2J9_BURCM]	147.65	13.49	1	3	3	6	341	36.7456	8.89502
Q0BIV5	Uncharacterized protein OS=Burkholderia ambifaria (strain ATCC BAA-244 / AMMD) OX=339670 GN=Bamb_0358 PE=4 SV=1 - [Q0BIV5_BURCM]	147.3	39.11	1	6	6	11	248	27.3569	5.56689
Q0BAI2	Uncharacterized protein OS=Burkholderia ambifaria (strain ATCC BAA-244 / AMMD) OX=339670 GN=Bamb_3286 PE=4 SV=1 - [Q0BAI2_BURCM]	146.74	47.37	1	3	3	5	114	11.654	9.40771
Q0BCF4	Pirin domain protein OS=Burkholderia ambifaria (strain ATCC BAA-244 / AMMD) OX=339670 GN=Bamb_2613 PE=3 SV=1 - [Q0BCF4_BURCM]	146.73	15.02	1	4	4	5	293	31.4812	6.40479
Q0B6C0	2,5-didehydrogluconate reductase OS=Burkholderia ambifaria (strain ATCC BAA-244 / AMMD) OX=339670 GN=Bamb_4753 PE=4 SV=1 - [Q0B6C0_BURCM]	145.91	22.39	1	4	4	8	268	28.9051	5.33838
Q0BI31	Nitrilase/cyanide hydratase and apolipoprotein N-acyltransferase OS=Burkholderia ambifaria (strain ATCC BAA-244 / AMMD) OX=339670 GN=Bamb_0633 PE=4 SV=1 - [Q0BI31_BURCM]	145.16	14.91	1	3	3	5	275	30.4824	6.62451
Q0BFY7	Segregation and condensation protein B OS=Burkholderia ambifaria (strain ATCC BAA-244 / AMMD) OX=339670 GN=Bamb_1378 PE=3 SV=1 - [Q0BFY7_BURCM]	144.9	17.06	1	5	5	7	340	36.185	4.48779
Q0BAT3	Thioredoxin domain protein OS=Burkholderia ambifaria (strain ATCC BAA-244 / AMMD) OX=339670 GN=Bamb_3184 PE=4 SV=1 - [Q0BAT3_BURCM]	144.27	25.4	1	2	2	4	126	13.8658	4.52588
Q0B905	UspA domain protein OS=Burkholderia ambifaria (strain ATCC BAA-244 / AMMD) OX=339670 GN=Bamb_3814 PE=4 SV=1 - [Q0B905_BURCM]	144.13	18.41	1	4	4	7	277	30.6738	6.66846
Q0BBQ8	Tetratricopeptide TPR_2 repeat protein OS=Burkholderia ambifaria (strain ATCC BAA-244 / AMMD) OX=339670 GN=Bamb_2859 PE=4 SV=1 - [Q0BBQ8_BURCM]	143.63	15.32	1	5	5	6	607	66.6086	7.1665
Q0BCE6	Selenium-binding protein OS=Burkholderia ambifaria (strain ATCC BAA-244 / AMMD) OX=339670 GN=Bamb_2621 PE=4 SV=1 - [Q0BCE6_BURCM]	143.28	16.67	1	6	6	9	468	52.3768	5.71924
Q0B2M9	Acyl carrier protein OS=Burkholderia ambifaria (strain ATCC BAA-244 / AMMD) OX=339670 GN=Bamb_6050 PE=4 SV=1 - [Q0B2M9_BURCM]	143.22	36.59	1	3	3	5	82	8.88247	4.48779
Q0BAZ2	Aldo/keto reductase OS=Burkholderia ambifaria (strain ATCC BAA-244 / AMMD) OX=339670 GN=Bamb_3125 PE=4 SV=1 - [Q0BAZ2_BURCM]	143.17	37.18	1	8	8	10	347	38.1703	6.3667
Q0BAG0	HpcH/HpaI aldolase OS=Burkholderia ambifaria (strain ATCC BAA-244 / AMMD) OX=339670 GN=Bamb_3308 PE=3 SV=1 - [Q0BAG0_BURCM]	143.13	15.27	1	4	4	9	334	35.6513	6.58057
Q0BBY9	Putative regulatory protein, FmdB family OS=Burkholderia ambifaria (strain ATCC BAA-244 / AMMD) OX=339670 GN=Bamb_2778 PE=4 SV=1 - [Q0BBY9_BURCM]	143.04	78.38	1	4	4	8	111	10.8331	6.46826
Q0BEH8	Isochorismatase hydrolase OS=Burkholderia ambifaria (strain ATCC BAA-244 / AMMD) OX=339670 GN=Bamb_1889 PE=4 SV=1 - [Q0BEH8_BURCM]	142.81	28.41	1	4	4	7	176	19.0371	7.02002
Q0BHR3	dTDP-glucose 4,6-dehydratase OS=Burkholderia ambifaria (strain ATCC BAA-244 / AMMD) OX=339670 GN=Bamb_0751 PE=3 SV=1 - [Q0BHR3_BURCM]	142.57	22.95	1	5	5	7	353	39.1946	6.354
Q0BIG6	Ribonucleoside-diphosphate reductase subunit beta OS=Burkholderia ambifaria (strain ATCC BAA-244 / AMMD) OX=339670 GN=Bamb_0498 PE=3 SV=1 - [Q0BIG6_BURCM]	142.56	10.67	1	3	3	5	403	45.8901	5.50342
Q0BC96	N5-carboxyaminoimidazole ribonucleotide mutase OS=Burkholderia ambifaria (strain ATCC BAA-244 / AMMD) OX=339670 GN=purE PE=3 SV=1 - [Q0BC96_BURCM]	142.32	52.6	1	5	5	9	173	17.9933	7.6792
Q0B6N4	Peptidase S10, serine carboxypeptidase OS=Burkholderia ambifaria (strain ATCC BAA-244 / AMMD) OX=339670 GN=Bamb_4639 PE=4 SV=1 - [Q0B6N4_BURCM]	141.67	14.16	1	4	4	5	558	60.1381	6.44287
Q0BJQ0	Glutamine amidotransferase class-I OS=Burkholderia ambifaria (strain ATCC BAA-244 / AMMD) OX=339670 GN=Bamb_0062 PE=4 SV=1 - [Q0BJQ0_BURCM]	141.59	17.37	1	3	3	7	236	25.4971	6.52197
Q0B6J6	Uncharacterized protein OS=Burkholderia ambifaria (strain ATCC BAA-244 / AMMD) OX=339670 GN=Bamb_4677 PE=4 SV=1 - [Q0B6J6_BURCM]	140.72	19.67	1	3	3	5	183	20.1605	9.78857
Q0BBW4	Uncharacterized protein OS=Burkholderia ambifaria (strain ATCC BAA-244 / AMMD) OX=339670 GN=Bamb_2803 PE=4 SV=1 - [Q0BBW4_BURCM]	140.23	24.06	1	5	5	7	266	28.4571	6.50732
Q0B101	Conjugal transfer TrbH family protein OS=Burkholderia ambifaria (strain ATCC BAA-244 / AMMD) OX=339670 GN=Bamb_6629 PE=4 SV=1 - [Q0B101_BURCM]	140.06	29.01	1	3	3	5	162	16.9928	9.30518
Q0B7Z1	Short-chain dehydrogenase/reductase SDR OS=Burkholderia ambifaria (strain ATCC BAA-244 / AMMD) OX=339670 GN=Bamb_4179 PE=3 SV=1 - [Q0B7Z1_BURCM]	138.67	46.84	1	7	7	10	237	24.1166	5.64307
Q0BFY8	Aminotransferase OS=Burkholderia ambifaria (strain ATCC BAA-244 / AMMD) OX=339670 GN=Bamb_1377 PE=3 SV=1 - [Q0BFY8_BURCM]	138.05	11	1	3	3	4	400	42.562	6.44287
Q0BEZ7	Uncharacterized protein OS=Burkholderia ambifaria (strain ATCC BAA-244 / AMMD) OX=339670 GN=Bamb_1720 PE=4 SV=1 - [Q0BEZ7_BURCM]	137.93	15.56	1	2	2	2	180	19.3708	4.70361
Q0B2T0	Uncharacterized protein OS=Burkholderia ambifaria (strain ATCC BAA-244 / AMMD) OX=339670 GN=Bamb_5999 PE=4 SV=1 - [Q0B2T0_BURCM]	137.84	20.37	1	2	2	8	108	11.306	10.1694
Q0BIR7	Peptidase M1, membrane alanine aminopeptidase OS=Burkholderia ambifaria (strain ATCC BAA-244 / AMMD) OX=339670 GN=Bamb_0397 PE=4 SV=1 - [Q0BIR7_BURCM]	137.75	9.97	1	5	5	7	722	78.5122	5.8208
Q0B1M6	Uncharacterized protein OS=Burkholderia ambifaria (strain ATCC BAA-244 / AMMD) OX=339670 GN=Bamb_6403 PE=4 SV=1 - [Q0B1M6_BURCM]	136.78	24.07	1	2	2	4	108	11.805	5.77002
Q0BEB8	Probable allantoicase OS=Burkholderia ambifaria (strain ATCC BAA-244 / AMMD) OX=339670 GN=alc PE=3 SV=1 - [Q0BEB8_BURCM]	136.57	18.69	1	5	5	9	337	37.2226	6.0874
Q0BBG1	RfaE bifunctional protein OS=Burkholderia ambifaria (strain ATCC BAA-244 / AMMD) OX=339670 GN=Bamb_2956 PE=4 SV=1 - [Q0BBG1_BURCM]	136.34	22.36	1	3	3	4	161	17.4722	7.44482
Q0BFM5	Uncharacterized protein OS=Burkholderia ambifaria (strain ATCC BAA-244 / AMMD) OX=339670 GN=Bamb_1490 PE=4 SV=1 - [Q0BFM5_BURCM]	136.25	31.43	1	3	3	5	140	15.2408	4.67822
Q0B7D9	3-hydroxyisobutyrate dehydrogenase OS=Burkholderia ambifaria (strain ATCC BAA-244 / AMMD) OX=339670 GN=Bamb_4382 PE=3 SV=1 - [Q0B7D9_BURCM]	135.85	21.67	1	4	4	6	300	30.1533	6.52197
Q0B974	N-isopropylammelide isopropylaminohydrolase OS=Burkholderia ambifaria (strain ATCC BAA-244 / AMMD) OX=339670 GN=Bamb_3745 PE=4 SV=1 - [Q0B974_BURCM]	135.64	12.83	1	3	3	6	413	45.3949	5.96045
Q0BJ29	30S ribosomal protein S5 OS=Burkholderia ambifaria (strain ATCC BAA-244 / AMMD) OX=339670 GN=rpsE PE=3 SV=1 - [RS5_BURCM]	135.44	31.4	1	6	6	10	172	18.0647	10.2866
Q0BA57	Alcohol dehydrogenase OS=Burkholderia ambifaria (strain ATCC BAA-244 / AMMD) OX=339670 GN=Bamb_3412 PE=4 SV=1 - [Q0BA57_BURCM]	135.01	13.77	1	4	4	6	385	40.2892	6.40479
Q0BDM3	Probable Fe(2+)-trafficking protein OS=Burkholderia ambifaria (strain ATCC BAA-244 / AMMD) OX=339670 GN=Bamb_2194 PE=3 SV=1 - [FETP_BURCM]	134.79	45.05	1	4	4	9	91	10.3181	6.66846
Q0BF07	Uncharacterized protein OS=Burkholderia ambifaria (strain ATCC BAA-244 / AMMD) OX=339670 GN=Bamb_1710 PE=4 SV=1 - [Q0BF07_BURCM]	134.78	23.33	1	3	3	4	150	16.4812	5.2749
Q0BJF0	Histone family protein nucleoid-structuring protein H-NS OS=Burkholderia ambifaria (strain ATCC BAA-244 / AMMD) OX=339670 GN=Bamb_0162 PE=4 SV=1 - [Q0BJF0_BURCM]	132	31.63	1	2	2	3	98	11.0679	10.2134
Q0B6M9	Agmatinase OS=Burkholderia ambifaria (strain ATCC BAA-244 / AMMD) OX=339670 GN=Bamb_4644 PE=3 SV=1 - [Q0B6M9_BURCM]	131.95	27.36	1	5	5	10	329	35.5549	5.97314
Q0B217	Lipase, class 3 OS=Burkholderia ambifaria (strain ATCC BAA-244 / AMMD) OX=339670 GN=Bamb_6262 PE=4 SV=1 - [Q0B217_BURCM]	131.88	7.23	1	2	2	4	346	37.2918	6.16357
Q0BAL7	GTP cyclohydrolase FolE2 OS=Burkholderia ambifaria (strain ATCC BAA-244 / AMMD) OX=339670 GN=folE2 PE=3 SV=1 - [GCH4_BURCM]	130.51	22.68	1	3	3	4	269	30.2266	5.66846
Q0BID5	CinA domain protein OS=Burkholderia ambifaria (strain ATCC BAA-244 / AMMD) OX=339670 GN=Bamb_0529 PE=3 SV=1 - [Q0BID5_BURCM]	129.99	22.83	1	3	3	6	184	19.8163	9.24658
Q0B3F6	3-hydroxyacyl-CoA dehydrogenase OS=Burkholderia ambifaria (strain ATCC BAA-244 / AMMD) OX=339670 GN=Bamb_5770 PE=4 SV=1 - [Q0B3F6_BURCM]	128.1	7.75	1	2	2	4	284	29.6878	5.75732
Q0B5W8	Aminotransferase OS=Burkholderia ambifaria (strain ATCC BAA-244 / AMMD) OX=339670 GN=Bamb_4906 PE=3 SV=1 - [Q0B5W8_BURCM]	128.04	8.19	1	2	2	3	452	49.1567	5.77002
Q0B844	Porin, Gram-negative type OS=Burkholderia ambifaria (strain ATCC BAA-244 / AMMD) OX=339670 GN=Bamb_4126 PE=4 SV=1 - [Q0B844_BURCM]	126.99	25.54	1	6	6	8	372	38.6161	9.5249
Q0B2V4	Uncharacterized protein OS=Burkholderia ambifaria (strain ATCC BAA-244 / AMMD) OX=339670 GN=Bamb_5975 PE=4 SV=1 - [Q0B2V4_BURCM]	126.83	22.76	1	3	3	5	145	16.3671	4.25928
Q0B947	Uncharacterized protein OS=Burkholderia ambifaria (strain ATCC BAA-244 / AMMD) OX=339670 GN=Bamb_3772 PE=4 SV=1 - [Q0B947_BURCM]	126.56	60.55	1	4	4	8	109	11.4078	9.18799
Q0B5C5	Uncharacterized protein OS=Burkholderia ambifaria (strain ATCC BAA-244 / AMMD) OX=339670 GN=Bamb_5099 PE=4 SV=1 - [Q0B5C5_BURCM]	126.31	24.51	1	3	3	5	102	11.6217	6.59521
Q0B441	Uncharacterized protein OS=Burkholderia ambifaria (strain ATCC BAA-244 / AMMD) OX=339670 GN=Bamb_5535 PE=4 SV=1 - [Q0B441_BURCM]	125.74	20.16	1	2	2	4	129	14.0483	6.96143
Q0BBJ5	Uncharacterized protein OS=Burkholderia ambifaria (strain ATCC BAA-244 / AMMD) OX=339670 GN=Bamb_2922 PE=4 SV=1 - [Q0BBJ5_BURCM]	125.41	39.76	1	3	3	5	83	9.44999	6.771
Q0BI92	Uncharacterized protein OS=Burkholderia ambifaria (strain ATCC BAA-244 / AMMD) OX=339670 GN=Bamb_0572 PE=4 SV=1 - [Q0BI92_BURCM]	125.27	22.77	1	2	2	3	101	10.2984	10.5796
Q0BC48	Galactonate dehydratase OS=Burkholderia ambifaria (strain ATCC BAA-244 / AMMD) OX=339670 GN=Bamb_2719 PE=4 SV=1 - [Q0BC48_BURCM]	125.25	12.3	1	3	3	5	382	42.3938	5.87158
Q0B355	Type II secretion system protein E OS=Burkholderia ambifaria (strain ATCC BAA-244 / AMMD) OX=339670 GN=Bamb_5872 PE=4 SV=1 - [Q0B355_BURCM]	125.18	16.39	1	5	5	6	366	41.0334	6.46826
Q0BAL9	Farnesyl-diphosphate synthase OS=Burkholderia ambifaria (strain ATCC BAA-244 / AMMD) OX=339670 GN=Bamb_3249 PE=3 SV=1 - [Q0BAL9_BURCM]	125.15	8.16	1	2	2	3	294	31.052	5.38916
Q0BCL0	Phosphoribosylglycinamide formyltransferase OS=Burkholderia ambifaria (strain ATCC BAA-244 / AMMD) OX=339670 GN=purN PE=3 SV=1 - [Q0BCL0_BURCM]	125.08	31.82	1	5	5	8	220	23.7605	7.02002
Q0BDB7	Phosphatidylserine decarboxylase proenzyme OS=Burkholderia ambifaria (strain ATCC BAA-244 / AMMD) OX=339670 GN=psd PE=3 SV=1 - [PSD_BURCM]	125.01	19.16	1	3	3	5	214	23.4595	9.31982
Q0B5Z7	Radical SAM domain protein OS=Burkholderia ambifaria (strain ATCC BAA-244 / AMMD) OX=339670 GN=Bamb_4877 PE=4 SV=1 - [Q0B5Z7_BURCM]	124.94	17.1	1	4	4	4	386	43.445	8.29443
Q0B943	UspA domain protein OS=Burkholderia ambifaria (strain ATCC BAA-244 / AMMD) OX=339670 GN=Bamb_3776 PE=4 SV=1 - [Q0B943_BURCM]	124.62	14.65	1	2	2	4	157	16.4087	6.18896
Q0BIN1	FMN-dependent NADH-azoreductase OS=Burkholderia ambifaria (strain ATCC BAA-244 / AMMD) OX=339670 GN=azoR PE=3 SV=1 - [Q0BIN1_BURCM]	123.61	14.65	1	2	2	3	198	20.8698	5.87158
Q0BFQ7	NUDIX hydrolase OS=Burkholderia ambifaria (strain ATCC BAA-244 / AMMD) OX=339670 GN=Bamb_1458 PE=3 SV=1 - [Q0BFQ7_BURCM]	123.53	35.86	1	4	4	8	198	22.198	5.14795
Q0B946	Uncharacterized protein OS=Burkholderia ambifaria (strain ATCC BAA-244 / AMMD) OX=339670 GN=Bamb_3773 PE=4 SV=1 - [Q0B946_BURCM]	122.71	18.66	1	2	2	4	134	14.4161	6.0874
Q0BBQ1	4Fe-4S ferredoxin, iron-sulfur binding domain protein OS=Burkholderia ambifaria (strain ATCC BAA-244 / AMMD) OX=339670 GN=Bamb_2866 PE=4 SV=1 - [Q0BBQ1_BURCM]	122.47	25	1	2	2	4	88	9.67321	4.41162
Q0B5E3	Acyl-CoA dehydrogenase domain protein OS=Burkholderia ambifaria (strain ATCC BAA-244 / AMMD) OX=339670 GN=Bamb_5081 PE=3 SV=1 - [Q0B5E3_BURCM]	121.82	13.29	1	3	3	4	414	46.3334	6.3667
Q0B7W7	2-dehydropantoate 2-reductase OS=Burkholderia ambifaria (strain ATCC BAA-244 / AMMD) OX=339670 GN=Bamb_4203 PE=3 SV=1 - [Q0B7W7_BURCM]	121.8	21.27	1	5	5	10	315	33.4945	7.10791
Q0BCA6	Uncharacterized protein OS=Burkholderia ambifaria (strain ATCC BAA-244 / AMMD) OX=339670 GN=Bamb_2661 PE=4 SV=1 - [Q0BCA6_BURCM]	121.79	30.25	1	3	3	5	119	13.1516	5.73193
Q0BC79	Glycosyl hydrolase, BNR repeat-containing protein OS=Burkholderia ambifaria (strain ATCC BAA-244 / AMMD) OX=339670 GN=Bamb_2688 PE=4 SV=1 - [Q0BC79_BURCM]	121.33	13.38	1	4	4	6	396	44.1458	5.85889
Q0BJM8	tRNA uridine 5-carboxymethylaminomethyl modification enzyme MnmG OS=Burkholderia ambifaria (strain ATCC BAA-244 / AMMD) OX=339670 GN=mnmG PE=3 SV=1 - [MNMG_BURCM]	121.3	7.01	1	3	3	5	656	71.99	6.16357
Q0B594	Pyridoxal-dependent decarboxylase OS=Burkholderia ambifaria (strain ATCC BAA-244 / AMMD) OX=339670 GN=Bamb_5130 PE=3 SV=1 - [Q0B594_BURCM]	120.5	10	1	4	4	7	450	47.7536	6.01123
Q0B2I1	Uncharacterized protein OS=Burkholderia ambifaria (strain ATCC BAA-244 / AMMD) OX=339670 GN=Bamb_6098 PE=4 SV=1 - [Q0B2I1_BURCM]	120.41	26.33	1	7	7	9	395	41.482	8.32373
Q0BCM0	Peptidyl-prolyl cis-trans isomerase OS=Burkholderia ambifaria (strain ATCC BAA-244 / AMMD) OX=339670 GN=Bamb_2547 PE=3 SV=1 - [Q0BCM0_BURCM]	120.22	27.81	1	2	2	4	151	16.2364	4.84326
Q0BGX8	Trehalose-6-phosphate synthase OS=Burkholderia ambifaria (strain ATCC BAA-244 / AMMD) OX=339670 GN=Bamb_1036 PE=3 SV=1 - [Q0BGX8_BURCM]	120.03	15.47	1	5	5	8	459	51.6338	6.63916
Q0B3C8	Cold-shock DNA-binding protein family OS=Burkholderia ambifaria (strain ATCC BAA-244 / AMMD) OX=339670 GN=Bamb_5798 PE=4 SV=1 - [Q0B3C8_BURCM]	119.73	32.84	1	2	2	4	67	7.21858	5.97314
Q0BJK2	Amino acid ABC transporter substrate-binding protein, PAAT family OS=Burkholderia ambifaria (strain ATCC BAA-244 / AMMD) OX=339670 GN=Bamb_0110 PE=3 SV=1 - [Q0BJK2_BURCM]	119.58	19.22	1	3	3	6	281	30.0167	9.40771
Q0BIU9	Uncharacterized protein OS=Burkholderia ambifaria (strain ATCC BAA-244 / AMMD) OX=339670 GN=Bamb_0364 PE=4 SV=1 - [Q0BIU9_BURCM]	118.68	13.86	1	3	3	4	303	34.3543	6.23975
Q0BEQ8	30S ribosomal protein S18 OS=Burkholderia ambifaria (strain ATCC BAA-244 / AMMD) OX=339670 GN=rpsR PE=3 SV=1 - [RS18_BURCM]	118.26	35.16	1	2	3	5	91	10.6187	10.2866
Q0B5P8	Tartrate dehydrogenase OS=Burkholderia ambifaria (strain ATCC BAA-244 / AMMD) OX=339670 GN=Bamb_4976 PE=4 SV=1 - [Q0B5P8_BURCM]	117.53	13.57	1	3	3	4	361	39.604	5.38916
Q0B769	Uncharacterized protein OS=Burkholderia ambifaria (strain ATCC BAA-244 / AMMD) OX=339670 GN=Bamb_4454 PE=4 SV=1 - [Q0B769_BURCM]	116.94	61	1	2	2	4	100	10.1911	7.41553
Q0B1P7	Histone family protein nucleoid-structuring protein H-NS OS=Burkholderia ambifaria (strain ATCC BAA-244 / AMMD) OX=339670 GN=Bamb_6382 PE=4 SV=1 - [Q0B1P7_BURCM]	115.88	23.23	1	2	2	4	99	10.8887	9.89111
Q0BB25	High-potential iron-sulfur protein OS=Burkholderia ambifaria (strain ATCC BAA-244 / AMMD) OX=339670 GN=Bamb_3092 PE=3 SV=1 - [Q0BB25_BURCM]	115.85	28.16	1	2	2	4	103	10.6543	9.31982
Q0BHD1	Adenine deaminase OS=Burkholderia ambifaria (strain ATCC BAA-244 / AMMD) OX=339670 GN=Bamb_0883 PE=3 SV=1 - [Q0BHD1_BURCM]	115.36	21.99	1	6	6	10	341	37.6444	5.38916
Q0BD28	Phenazine biosynthesis protein PhzF family OS=Burkholderia ambifaria (strain ATCC BAA-244 / AMMD) OX=339670 GN=Bamb_2389 PE=4 SV=1 - [Q0BD28_BURCM]	114.94	16.04	1	3	3	5	293	30.8664	5.13525
Q0BIS7	ATPase AAA-2 domain protein OS=Burkholderia ambifaria (strain ATCC BAA-244 / AMMD) OX=339670 GN=Bamb_0387 PE=4 SV=1 - [Q0BIS7_BURCM]	114.74	8.77	1	5	5	8	889	96.4853	5.45264
Q0B9G5	5-carboxy-2-oxohept-3-enedioate decarboxylase HpaG2 subunit OS=Burkholderia ambifaria (strain ATCC BAA-244 / AMMD) OX=339670 GN=Bamb_3654 PE=4 SV=1 - [Q0B9G5_BURCM]	114.07	12.6	1	2	2	4	254	27.7831	5.97314
Q0BD61	Periplasmic protein OS=Burkholderia ambifaria (strain ATCC BAA-244 / AMMD) OX=339670 GN=Bamb_2356 PE=4 SV=1 - [Q0BD61_BURCM]	112.89	51.18	1	4	4	8	127	13.9061	9.12939
Q0B9B8	NADH:flavin oxidoreductase/NADH oxidase OS=Burkholderia ambifaria (strain ATCC BAA-244 / AMMD) OX=339670 GN=Bamb_3701 PE=4 SV=1 - [Q0B9B8_BURCM]	112.87	14.09	1	3	3	4	369	40.2555	6.41748
Q0BIM4	Phosphoglycolate phosphatase OS=Burkholderia ambifaria (strain ATCC BAA-244 / AMMD) OX=339670 GN=gph PE=3 SV=1 - [Q0BIM4_BURCM]	112.46	18.33	1	3	3	5	251	26.1805	5.61768
Q0BH67	tRNA (guanine-N(1)-)-methyltransferase OS=Burkholderia ambifaria (strain ATCC BAA-244 / AMMD) OX=339670 GN=trmD PE=3 SV=1 - [TRMD_BURCM]	112.45	8.71	1	2	2	4	264	29.4199	5.75732
Q0BHS6	Putative pre-16S rRNA nuclease OS=Burkholderia ambifaria (strain ATCC BAA-244 / AMMD) OX=339670 GN=Bamb_0738 PE=3 SV=1 - [YQGF_BURCM]	112.38	20.81	1	3	3	5	149	16.5845	7.15186
Q0BG48	Peptidoglycan-binding LysM OS=Burkholderia ambifaria (strain ATCC BAA-244 / AMMD) OX=339670 GN=Bamb_1317 PE=4 SV=1 - [Q0BG48_BURCM]	112.19	5.08	1	2	2	4	453	48.7032	8.6167
Q0BGS5	NAD-dependent epimerase/dehydratase OS=Burkholderia ambifaria (strain ATCC BAA-244 / AMMD) OX=339670 GN=Bamb_1089 PE=4 SV=1 - [Q0BGS5_BURCM]	111.73	29.11	1	3	4	7	213	21.8283	5.87158
Q0BDF8	Uncharacterized protein OS=Burkholderia ambifaria (strain ATCC BAA-244 / AMMD) OX=339670 GN=Bamb_2259 PE=4 SV=1 - [Q0BDF8_BURCM]	111.44	20.98	1	2	2	6	205	21.9455	9.93506
Q0B3L6	Respiratory nitrate reductase beta subunit OS=Burkholderia ambifaria (strain ATCC BAA-244 / AMMD) OX=339670 GN=Bamb_5710 PE=4 SV=1 - [Q0B3L6_BURCM]	110.96	5.28	1	2	2	3	511	58.0717	6.39209
Q0BI89	Putative iron-sulfur cluster insertion protein ErpA OS=Burkholderia ambifaria (strain ATCC BAA-244 / AMMD) OX=339670 GN=erpA PE=3 SV=1 - [ERPA_BURCM]	110.59	30.89	1	2	2	3	123	13.2602	4.18311
Q0B889	N-hydroxyarylamine O-acetyltransferase OS=Burkholderia ambifaria (strain ATCC BAA-244 / AMMD) OX=339670 GN=Bamb_4081 PE=3 SV=1 - [Q0B889_BURCM]	110.01	10.47	1	2	2	3	277	30.8418	5.85889
Q0BH53	Thymidylate synthase OS=Burkholderia ambifaria (strain ATCC BAA-244 / AMMD) OX=339670 GN=thyA PE=3 SV=1 - [Q0BH53_BURCM]	110	10.22	1	2	2	2	323	36.6067	6.17627
Q0BJP3	Phenylalanine 4-hydroxylase OS=Burkholderia ambifaria (strain ATCC BAA-244 / AMMD) OX=339670 GN=Bamb_0069 PE=4 SV=1 - [Q0BJP3_BURCM]	109.98	16.23	1	3	3	5	308	34.5115	5.14795
Q0B975	Glyoxalase/bleomycin resistance protein/dioxygenase OS=Burkholderia ambifaria (strain ATCC BAA-244 / AMMD) OX=339670 GN=Bamb_3744 PE=4 SV=1 - [Q0B975_BURCM]	109.95	20.13	1	2	2	3	154	17.0382	5.88428
Q0B6A6	Lipoprotein OS=Burkholderia ambifaria (strain ATCC BAA-244 / AMMD) OX=339670 GN=Bamb_4767 PE=3 SV=1 - [Q0B6A6_BURCM]	109.68	17.16	1	2	4	6	268	28.5563	9.18799
Q0BI43	Pyridoxal phosphate homeostasis protein OS=Burkholderia ambifaria (strain ATCC BAA-244 / AMMD) OX=339670 GN=Bamb_0621 PE=3 SV=1 - [Q0BI43_BURCM]	109.49	12.69	1	3	3	6	268	28.746	7.6792
Q0BH11	RNA polymerase sigma factor OS=Burkholderia ambifaria (strain ATCC BAA-244 / AMMD) OX=339670 GN=Bamb_1003 PE=3 SV=1 - [Q0BH11_BURCM]	109.22	33.67	1	4	4	7	199	22.6237	5.38916
Q0BFQ6	UPF0303 protein Bamb_1459 OS=Burkholderia ambifaria (strain ATCC BAA-244 / AMMD) OX=339670 GN=Bamb_1459 PE=3 SV=1 - [Y1459_BURCM]	109.02	49.09	1	4	4	4	165	17.4859	7.25439
Q0BIJ7	Cell division protein FtsA OS=Burkholderia ambifaria (strain ATCC BAA-244 / AMMD) OX=339670 GN=ftsA PE=3 SV=1 - [Q0BIJ7_BURCM]	109.01	12.93	1	3	3	3	410	43.7889	5.04639
Q0BB84	Uncharacterized protein OS=Burkholderia ambifaria (strain ATCC BAA-244 / AMMD) OX=339670 GN=Bamb_3033 PE=4 SV=1 - [Q0BB84_BURCM]	108.88	41.67	1	2	2	5	72	8.13594	4.70361
Q0BDR0	Uncharacterized protein OS=Burkholderia ambifaria (strain ATCC BAA-244 / AMMD) OX=339670 GN=Bamb_2157 PE=4 SV=1 - [Q0BDR0_BURCM]	108.17	34.78	1	3	3	5	69	8.01781	4.36084
Q0BBN3	N-acetylglucosamine 6-phosphate deacetylase OS=Burkholderia ambifaria (strain ATCC BAA-244 / AMMD) OX=339670 GN=Bamb_2884 PE=3 SV=1 - [Q0BBN3_BURCM]	108.05	14.99	1	3	3	3	367	38.5798	5.92236
Q0BGQ8	Uncharacterized protein OS=Burkholderia ambifaria (strain ATCC BAA-244 / AMMD) OX=339670 GN=Bamb_1106 PE=4 SV=1 - [Q0BGQ8_BURCM]	108	25.3	1	2	2	3	83	8.53699	9.34912
Q0B2U9	Late embryogenesis abundant protein OS=Burkholderia ambifaria (strain ATCC BAA-244 / AMMD) OX=339670 GN=Bamb_5980 PE=4 SV=1 - [Q0B2U9_BURCM]	107.85	21.08	1	2	2	4	185	16.3144	9.90576
Q0BBF7	Enoyl-CoA hydratase/isomerase OS=Burkholderia ambifaria (strain ATCC BAA-244 / AMMD) OX=339670 GN=Bamb_2960 PE=3 SV=1 - [Q0BBF7_BURCM]	106.97	20.73	1	4	4	6	275	29.6091	5.69385
Q0B6Q3	Uncharacterized protein OS=Burkholderia ambifaria (strain ATCC BAA-244 / AMMD) OX=339670 GN=Bamb_4620 PE=4 SV=1 - [Q0B6Q3_BURCM]	106.76	20.71	1	2	2	3	140	14.4503	5.22412
Q0B6C9	Alcohol dehydrogenase, zinc-binding domain protein OS=Burkholderia ambifaria (strain ATCC BAA-244 / AMMD) OX=339670 GN=Bamb_4744 PE=4 SV=1 - [Q0B6C9_BURCM]	106.11	11.93	1	2	2	4	327	34.1879	7.50342
Q0B848	GTP cyclohydrolase-2 OS=Burkholderia ambifaria (strain ATCC BAA-244 / AMMD) OX=339670 GN=ribA PE=3 SV=1 - [Q0B848_BURCM]	105.3	23.15	1	5	5	6	216	23.7759	5.64307
Q0BAS3	Phosphonoacetate hydrolase OS=Burkholderia ambifaria (strain ATCC BAA-244 / AMMD) OX=339670 GN=Bamb_3194 PE=4 SV=1 - [Q0BAS3_BURCM]	104.03	19.17	1	4	4	7	412	44.623	5.40186
Q0BGG5	Uncharacterized small conserved protein OS=Burkholderia ambifaria (strain ATCC BAA-244 / AMMD) OX=339670 GN=Bamb_1200 PE=4 SV=1 - [Q0BGG5_BURCM]	103.89	26.52	1	3	3	6	132	14.147	5.47803
Q0BBK7	Glutaredoxin OS=Burkholderia ambifaria (strain ATCC BAA-244 / AMMD) OX=339670 GN=Bamb_2910 PE=3 SV=1 - [Q0BBK7_BURCM]	103.45	39.53	1	3	3	6	86	9.8011	7.98682
Q0B3P9	Transcriptional regulator, AbrB family OS=Burkholderia ambifaria (strain ATCC BAA-244 / AMMD) OX=339670 GN=Bamb_5677 PE=4 SV=1 - [Q0B3P9_BURCM]	102.89	29.63	1	2	2	4	81	8.69057	9.59814
Q0B2Z9	Uncharacterized protein OS=Burkholderia ambifaria (strain ATCC BAA-244 / AMMD) OX=339670 GN=Bamb_5929 PE=4 SV=1 - [Q0B2Z9_BURCM]	101.83	23.79	1	4	4	7	206	23.8223	6.81494
Q0B9G4	5-carboxymethyl-2-hydroxymuconate semialdehyde dehydrogenase OS=Burkholderia ambifaria (strain ATCC BAA-244 / AMMD) OX=339670 GN=Bamb_3655 PE=3 SV=1 - [Q0B9G4_BURCM]	101.69	11.91	1	3	3	4	487	53.068	6.29053
Q0BHG9	Cell division topological specificity factor OS=Burkholderia ambifaria (strain ATCC BAA-244 / AMMD) OX=339670 GN=minE PE=3 SV=1 - [MINE_BURCM]	101.47	22.62	1	2	2	4	84	9.43323	7.25439
Q0B6C5	Glucose-6-phosphate 1-dehydrogenase OS=Burkholderia ambifaria (strain ATCC BAA-244 / AMMD) OX=339670 GN=zwf PE=3 SV=1 - [Q0B6C5_BURCM]	100.81	8.96	1	3	3	5	491	55.1933	6.26514
Q0B9L9	Acyl carrier protein OS=Burkholderia ambifaria (strain ATCC BAA-244 / AMMD) OX=339670 GN=acpP PE=3 SV=1 - [Q0B9L9_BURCM]	100.08	35.37	1	3	3	5	82	9.27889	4.90674
Q0BEY1	RNA binding S1 domain protein OS=Burkholderia ambifaria (strain ATCC BAA-244 / AMMD) OX=339670 GN=Bamb_1736 PE=4 SV=1 - [Q0BEY1_BURCM]	99.89	5.3	1	3	3	4	774	84.5447	6.43018
Q0B6G8	Uncharacterized protein OS=Burkholderia ambifaria (strain ATCC BAA-244 / AMMD) OX=339670 GN=Bamb_4705 PE=4 SV=1 - [Q0B6G8_BURCM]	99.88	29.59	1	2	2	3	98	10.4332	9.80322
Q0BDA2	Uncharacterized protein OS=Burkholderia ambifaria (strain ATCC BAA-244 / AMMD) OX=339670 GN=Bamb_2315 PE=4 SV=1 - [Q0BDA2_BURCM]	99.52	22.93	1	3	3	4	205	22.4331	6.04932
Q0BAN9	Molybdenum ABC transporter, periplasmic molybdate-binding protein OS=Burkholderia ambifaria (strain ATCC BAA-244 / AMMD) OX=339670 GN=Bamb_3228 PE=4 SV=1 - [Q0BAN9_BURCM]	98.62	14.72	1	3	3	5	265	27.6667	9.5249
Q0BFY2	Ribosome-binding factor A OS=Burkholderia ambifaria (strain ATCC BAA-244 / AMMD) OX=339670 GN=rbfA PE=3 SV=1 - [RBFA_BURCM]	98.4	28.03	1	3	3	5	132	15.0567	6.72705
Q0BAR5	Glutamate--cysteine ligase OS=Burkholderia ambifaria (strain ATCC BAA-244 / AMMD) OX=339670 GN=gshA PE=3 SV=1 - [Q0BAR5_BURCM]	98.14	4.47	1	2	2	4	537	60.0342	5.79541
Q0BFH3	Folate-dependent phosphoribosylglycinamide formyltransferase PurN-like protein OS=Burkholderia ambifaria (strain ATCC BAA-244 / AMMD) OX=339670 GN=Bamb_1542 PE=4 SV=1 - [Q0BFH3_BURCM]	98.04	11.47	1	3	3	5	279	31.017	6.11279
Q0BDH5	Uncharacterized protein OS=Burkholderia ambifaria (strain ATCC BAA-244 / AMMD) OX=339670 GN=Bamb_2242 PE=4 SV=1 - [Q0BDH5_BURCM]	96.93	26.71	1	3	3	5	161	18.5863	4.99561
Q0BIF3	UDP-N-acetylmuramate--L-alanyl-gamma-D-glutamyl-meso-2,6-diaminoheptandioate ligase OS=Burkholderia ambifaria (strain ATCC BAA-244 / AMMD) OX=339670 GN=mpl PE=3 SV=1 - [Q0BIF3_BURCM]	96.76	12.36	1	3	3	5	461	49.4574	6.23975
Q0B2X7	Uncharacterized protein OS=Burkholderia ambifaria (strain ATCC BAA-244 / AMMD) OX=339670 GN=Bamb_5951 PE=4 SV=1 - [Q0B2X7_BURCM]	95.66	22.01	2	2	3	5	159	18.8253	7.50342
Q0B2W2	Amidase, hydantoinase/carbamoylase family OS=Burkholderia ambifaria (strain ATCC BAA-244 / AMMD) OX=339670 GN=Bamb_5967 PE=4 SV=1 - [Q0B2W2_BURCM]	95.64	10.8	1	3	3	4	426	45.5389	5.59229
Q0B6S7	Uncharacterized protein OS=Burkholderia ambifaria (strain ATCC BAA-244 / AMMD) OX=339670 GN=Bamb_4596 PE=4 SV=1 - [Q0B6S7_BURCM]	95.52	18.24	1	2	2	4	148	15.4957	6.29053
Q0BI11	HAD-superfamily subfamily IB hydrolase, TIGR01490 OS=Burkholderia ambifaria (strain ATCC BAA-244 / AMMD) OX=339670 GN=Bamb_0653 PE=4 SV=1 - [Q0BI11_BURCM]	95.36	11.11	1	2	2	3	225	25.4265	5.31299
Q0B4W3	Pyridoxamine 5'-phosphate oxidase-related, FMN-binding protein OS=Burkholderia ambifaria (strain ATCC BAA-244 / AMMD) OX=339670 GN=Bamb_5263 PE=4 SV=1 - [Q0B4W3_BURCM]	95.21	23.74	1	4	4	6	198	21.9682	6.12549
Q0B1U0	Cupin 2, conserved barrel domain protein OS=Burkholderia ambifaria (strain ATCC BAA-244 / AMMD) OX=339670 GN=Bamb_6339 PE=4 SV=1 - [Q0B1U0_BURCM]	94.74	18.94	1	2	2	5	132	14.7784	5.13525
Q0BIF8	Acetyl-CoA carboxylase, biotin carboxylase OS=Burkholderia ambifaria (strain ATCC BAA-244 / AMMD) OX=339670 GN=Bamb_0506 PE=4 SV=1 - [Q0BIF8_BURCM]	94.26	12.31	1	4	4	7	455	50.5537	6.84424
Q0BCH3	UPF0434 protein Bamb_2594 OS=Burkholderia ambifaria (strain ATCC BAA-244 / AMMD) OX=339670 GN=Bamb_2594 PE=3 SV=1 - [Y2594_BURCM]	94.24	34.33	1	2	2	3	67	7.18364	4.77979
Q0BH24	Rieske (2Fe-2S) domain protein OS=Burkholderia ambifaria (strain ATCC BAA-244 / AMMD) OX=339670 GN=Bamb_0990 PE=4 SV=1 - [Q0BH24_BURCM]	94.01	17.65	1	2	2	5	136	14.5369	4.97021
Q0B2B6	Proline iminopeptidase OS=Burkholderia ambifaria (strain ATCC BAA-244 / AMMD) OX=339670 GN=Bamb_6163 PE=3 SV=1 - [Q0B2B6_BURCM]	93.98	19.16	1	5	5	6	334	35.571	11.6343
Q0BBE9	Arginine--tRNA ligase OS=Burkholderia ambifaria (strain ATCC BAA-244 / AMMD) OX=339670 GN=argS PE=3 SV=1 - [SYR_BURCM]	93.7	12.82	1	5	5	6	593	64.2489	5.99854
Q0B2V9	Short-chain dehydrogenase/reductase SDR OS=Burkholderia ambifaria (strain ATCC BAA-244 / AMMD) OX=339670 GN=Bamb_5970 PE=3 SV=1 - [Q0B2V9_BURCM]	93.67	16.86	1	3	3	7	255	26.2916	5.97314
Q0BAV8	Alcohol dehydrogenase, zinc-binding domain protein OS=Burkholderia ambifaria (strain ATCC BAA-244 / AMMD) OX=339670 GN=Bamb_3159 PE=3 SV=1 - [Q0BAV8_BURCM]	93.07	15.71	1	3	3	5	350	38.1832	6.39209
Q0BEW0	3'-5' exonuclease OS=Burkholderia ambifaria (strain ATCC BAA-244 / AMMD) OX=339670 GN=Bamb_1757 PE=4 SV=1 - [Q0BEW0_BURCM]	92.96	21.32	1	3	3	4	258	29.2536	5.36377
Q0B7W4	Uncharacterized protein OS=Burkholderia ambifaria (strain ATCC BAA-244 / AMMD) OX=339670 GN=Bamb_4206 PE=4 SV=1 - [Q0B7W4_BURCM]	92.38	12.88	1	2	2	2	163	18.2299	4.85596
Q0BI15	3-methyl-2-oxobutanoate hydroxymethyltransferase 1 OS=Burkholderia ambifaria (strain ATCC BAA-244 / AMMD) OX=339670 GN=panB1 PE=3 SV=1 - [PANB1_BURCM]	91.96	25.09	1	4	4	5	271	28.7219	6.41748
Q0B580	Uncharacterized protein OS=Burkholderia ambifaria (strain ATCC BAA-244 / AMMD) OX=339670 GN=Bamb_5144 PE=4 SV=1 - [Q0B580_BURCM]	91.8	20.14	1	2	2	3	139	15.6729	6.25244
Q0B4X5	FAD dependent oxidoreductase OS=Burkholderia ambifaria (strain ATCC BAA-244 / AMMD) OX=339670 GN=Bamb_5250 PE=4 SV=1 - [Q0B4X5_BURCM]	91.61	13.08	1	4	4	5	390	42.5434	5.16064
Q0BGX3	D-glucarate dehydratase OS=Burkholderia ambifaria (strain ATCC BAA-244 / AMMD) OX=339670 GN=Bamb_1041 PE=3 SV=1 - [Q0BGX3_BURCM]	91.52	11.33	1	3	3	4	450	49.2749	6.27783
Q0BAL4	30S ribosomal protein S21 OS=Burkholderia ambifaria (strain ATCC BAA-244 / AMMD) OX=339670 GN=rpsU PE=3 SV=1 - [Q0BAL4_BURCM]	91.22	28.57	1	2	2	6	70	8.52783	11.0337
Q0BIW0	Histidine triad (HIT) protein OS=Burkholderia ambifaria (strain ATCC BAA-244 / AMMD) OX=339670 GN=Bamb_0353 PE=4 SV=1 - [Q0BIW0_BURCM]	91.12	29.75	1	3	3	6	121	13.1237	6.62451
Q0B692	Uncharacterized protein OS=Burkholderia ambifaria (strain ATCC BAA-244 / AMMD) OX=339670 GN=Bamb_4781 PE=4 SV=1 - [Q0B692_BURCM]	90.96	23.53	1	2	2	3	170	18.5815	7.26904
Q0BJ22	30S ribosomal protein S11 OS=Burkholderia ambifaria (strain ATCC BAA-244 / AMMD) OX=339670 GN=rpsK PE=3 SV=1 - [RS11_BURCM]	90.93	17.29	1	2	2	3	133	14.1096	11.4146
Q0BH28	Ribonuclease E OS=Burkholderia ambifaria (strain ATCC BAA-244 / AMMD) OX=339670 GN=rne PE=3 SV=1 - [Q0BH28_BURCM]	90.8	5.71	1	4	4	5	1068	116.216	5.97314
Q0BH08	Periplasmic serine endoprotease DegP-like OS=Burkholderia ambifaria (strain ATCC BAA-244 / AMMD) OX=339670 GN=Bamb_1006 PE=3 SV=1 - [Q0BH08_BURCM]	90.48	9.42	1	3	3	3	499	52.1423	8.57275
Q0BJ65	Phenylacetate-CoA oxygenase, PaaH subunit OS=Burkholderia ambifaria (strain ATCC BAA-244 / AMMD) OX=339670 GN=Bamb_0248 PE=4 SV=1 - [Q0BJ65_BURCM]	89.3	41.49	1	3	3	6	94	10.7193	6.68311
Q0B9M6	Gamma-glutamyltransferase 1, Threonine peptidase, MEROPS family T03 OS=Burkholderia ambifaria (strain ATCC BAA-244 / AMMD) OX=339670 GN=Bamb_3593 PE=4 SV=1 - [Q0B9M6_BURCM]	89.1	5.41	1	2	2	4	573	61.6806	8.82178
Q0BIZ5	Glycerophosphodiester phosphodiesterase OS=Burkholderia ambifaria (strain ATCC BAA-244 / AMMD) OX=339670 GN=Bamb_0318 PE=4 SV=1 - [Q0BIZ5_BURCM]	88.93	14.17	1	2	2	2	254	27.1716	5.36377
Q0BCM7	Uncharacterized protein OS=Burkholderia ambifaria (strain ATCC BAA-244 / AMMD) OX=339670 GN=Bamb_2540 PE=4 SV=1 - [Q0BCM7_BURCM]	88.87	24.22	1	3	3	3	223	24.0409	5.10986
Q0BCD2	Transcriptional regulator, DeoR family OS=Burkholderia ambifaria (strain ATCC BAA-244 / AMMD) OX=339670 GN=Bamb_2635 PE=4 SV=1 - [Q0BCD2_BURCM]	87.74	5.59	1	2	2	4	340	36.374	7.38623
Q0BHX2	Uncharacterized protein OS=Burkholderia ambifaria (strain ATCC BAA-244 / AMMD) OX=339670 GN=Bamb_0692 PE=4 SV=1 - [Q0BHX2_BURCM]	87.59	22	1	2	2	3	100	10.8368	8.96826
Q0BED7	2-C-methyl-D-erythritol 2,4-cyclodiphosphate synthase OS=Burkholderia ambifaria (strain ATCC BAA-244 / AMMD) OX=339670 GN=ispF PE=3 SV=1 - [ISPF_BURCM]	86.97	19.88	1	2	2	3	161	16.8679	6.68311
Q0BGX9	Trehalose 6-phosphate phosphatase OS=Burkholderia ambifaria (strain ATCC BAA-244 / AMMD) OX=339670 GN=Bamb_1035 PE=3 SV=1 - [Q0BGX9_BURCM]	86.62	19.6	1	4	4	6	250	26.981	5.52881
Q0BGQ1	3',5'-cyclic adenosine monophosphate phosphodiesterase CpdA OS=Burkholderia ambifaria (strain ATCC BAA-244 / AMMD) OX=339670 GN=cpdA PE=3 SV=1 - [Q0BGQ1_BURCM]	86.22	13.14	1	2	2	4	274	29.8723	6.3667
Q0BB22	Uncharacterized protein OS=Burkholderia ambifaria (strain ATCC BAA-244 / AMMD) OX=339670 GN=Bamb_3095 PE=4 SV=1 - [Q0BB22_BURCM]	86.2	29.01	1	2	2	5	162	17.3309	6.63916
Q0B887	Amidase OS=Burkholderia ambifaria (strain ATCC BAA-244 / AMMD) OX=339670 GN=Bamb_4083 PE=3 SV=1 - [Q0B887_BURCM]	84.99	20.24	1	5	5	7	494	53.3752	6.66846
Q0BEC2	5-hydroxyisourate hydrolase OS=Burkholderia ambifaria (strain ATCC BAA-244 / AMMD) OX=339670 GN=Bamb_1945 PE=3 SV=1 - [Q0BEC2_BURCM]	83.54	17.09	1	2	2	4	117	12.6955	6.68311
Q0BHK3	3-octaprenyl-4-hydroxybenzoate carboxy-lyase OS=Burkholderia ambifaria (strain ATCC BAA-244 / AMMD) OX=339670 GN=ubiD PE=3 SV=1 - [Q0BHK3_BURCM]	83.49	6.37	1	2	2	2	518	56.9864	6.48096
Q0B9U1	Uncharacterized protein OS=Burkholderia ambifaria (strain ATCC BAA-244 / AMMD) OX=339670 GN=Bamb_3528 PE=4 SV=1 - [Q0B9U1_BURCM]	81.15	13.17	1	3	3	4	281	30.1063	7.79639
Q0B635	2-methylaconitate cis-trans isomerase OS=Burkholderia ambifaria (strain ATCC BAA-244 / AMMD) OX=339670 GN=Bamb_4839 PE=4 SV=1 - [Q0B635_BURCM]	81.08	11.11	1	3	3	3	396	41.1381	6.18896
Q0BAU2	Response regulator receiver protein OS=Burkholderia ambifaria (strain ATCC BAA-244 / AMMD) OX=339670 GN=Bamb_3175 PE=4 SV=1 - [Q0BAU2_BURCM]	81.08	15.45	1	3	3	5	233	24.6769	5.10986
Q0B5K5	3-carboxy-cis,cis-muconate cycloisomerase OS=Burkholderia ambifaria (strain ATCC BAA-244 / AMMD) OX=339670 GN=Bamb_5019 PE=4 SV=1 - [Q0B5K5_BURCM]	81.08	8.48	1	2	2	2	460	48.4935	6.30322
Q0B569	1-aminocyclopropane-1-carboxylate deaminase OS=Burkholderia ambifaria (strain ATCC BAA-244 / AMMD) OX=339670 GN=acdS PE=3 SV=1 - [1A1D_BURCM]	80.61	27.81	1	5	5	6	338	36.7426	6.18896
Q0BG08	Endoribonuclease L-PSP OS=Burkholderia ambifaria (strain ATCC BAA-244 / AMMD) OX=339670 GN=Bamb_1357 PE=4 SV=1 - [Q0BG08_BURCM]	80.38	36.75	1	2	2	4	117	12.6265	5.40186
Q0B445	Alcohol dehydrogenase, zinc-binding domain protein OS=Burkholderia ambifaria (strain ATCC BAA-244 / AMMD) OX=339670 GN=Bamb_5531 PE=4 SV=1 - [Q0B445_BURCM]	80.13	5.62	1	2	2	3	338	35.8438	6.69775
Q0BFZ5	Uncharacterized protein OS=Burkholderia ambifaria (strain ATCC BAA-244 / AMMD) OX=339670 GN=Bamb_1370 PE=4 SV=1 - [Q0BFZ5_BURCM]	80.05	51.76	1	2	2	3	85	9.60884	4.75439
Q0B8K1	Uncharacterized protein OS=Burkholderia ambifaria (strain ATCC BAA-244 / AMMD) OX=339670 GN=Bamb_3968 PE=4 SV=1 - [Q0B8K1_BURCM]	79.53	22.22	1	2	2	4	108	10.9505	7.98682
Q0BGK8	Glutathione S-transferase-like protein OS=Burkholderia ambifaria (strain ATCC BAA-244 / AMMD) OX=339670 GN=Bamb_1157 PE=4 SV=1 - [Q0BGK8_BURCM]	79.51	12.44	1	2	2	3	209	23.0913	6.53662
Q0B6W8	NAD-dependent epimerase/dehydratase OS=Burkholderia ambifaria (strain ATCC BAA-244 / AMMD) OX=339670 GN=Bamb_4555 PE=4 SV=1 - [Q0B6W8_BURCM]	79.12	26.01	1	6	6	8	323	34.5361	5.50342
Q0B2B9	High-potential iron-sulfur protein OS=Burkholderia ambifaria (strain ATCC BAA-244 / AMMD) OX=339670 GN=Bamb_6160 PE=3 SV=1 - [Q0B2B9_BURCM]	79.08	27.62	1	2	2	3	105	11.1023	8.85107
Q0B7D8	Methylmalonate-semialdehyde dehydrogenase (Acylating) OS=Burkholderia ambifaria (strain ATCC BAA-244 / AMMD) OX=339670 GN=Bamb_4383 PE=4 SV=1 - [Q0B7D8_BURCM]	78.66	8.64	1	3	3	4	509	54.022	6.21436
Q0BJ70	Transcriptional regulator, TetR family OS=Burkholderia ambifaria (strain ATCC BAA-244 / AMMD) OX=339670 GN=Bamb_0243 PE=4 SV=1 - [Q0BJ70_BURCM]	78.23	8.96	1	2	2	3	201	22.9517	6.56592
Q0BEZ2	Uncharacterized protein OS=Burkholderia ambifaria (strain ATCC BAA-244 / AMMD) OX=339670 GN=Bamb_1725 PE=4 SV=1 - [Q0BEZ2_BURCM]	78.22	34.07	1	2	2	3	91	9.76791	8.49951
Q0BH60	Oligoribonuclease OS=Burkholderia ambifaria (strain ATCC BAA-244 / AMMD) OX=339670 GN=orn PE=3 SV=1 - [ORN_BURCM]	77.71	24.27	1	3	3	4	206	23.0584	5.80811
Q0BHU0	Amino acid ABC transporter substrate-binding protein, PAAT family OS=Burkholderia ambifaria (strain ATCC BAA-244 / AMMD) OX=339670 GN=Bamb_0724 PE=3 SV=1 - [Q0BHU0_BURCM]	77	13.13	1	2	2	3	259	27.6293	8.1333
Q0BI08	Uncharacterized protein OS=Burkholderia ambifaria (strain ATCC BAA-244 / AMMD) OX=339670 GN=Bamb_0656 PE=4 SV=1 - [Q0BI08_BURCM]	76.62	39.69	1	3	3	5	131	14.5154	5.63037
Q0BJL2	Cyclohexadienyl dehydratase OS=Burkholderia ambifaria (strain ATCC BAA-244 / AMMD) OX=339670 GN=Bamb_0100 PE=3 SV=1 - [Q0BJL2_BURCM]	76.61	10	1	2	2	3	270	29.4358	7.98682
Q0BJB5	Transcriptional regulator, AsnC family OS=Burkholderia ambifaria (strain ATCC BAA-244 / AMMD) OX=339670 GN=Bamb_0197 PE=4 SV=1 - [Q0BJB5_BURCM]	76.15	10.9	1	2	2	4	156	17.8003	6.37939
Q0BJ11	Protein-methionine-sulfoxide reductase catalytic subunit MsrP OS=Burkholderia ambifaria (strain ATCC BAA-244 / AMMD) OX=339670 GN=msrP PE=3 SV=1 - [Q0BJ11_BURCM]	76	20.93	1	4	4	5	344	38.2817	9.71533
Q0BHH0	Site-determining protein OS=Burkholderia ambifaria (strain ATCC BAA-244 / AMMD) OX=339670 GN=Bamb_0844 PE=3 SV=1 - [Q0BHH0_BURCM]	75.13	11.07	1	2	2	2	271	29.4805	6.11279
Q0B132	Uncharacterized protein OS=Burkholderia ambifaria (strain ATCC BAA-244 / AMMD) OX=339670 GN=Bamb_6598 PE=4 SV=1 - [Q0B132_BURCM]	75.05	22.35	1	2	2	4	85	9.29889	7.97217
Q0BCX3	Uncharacterized protein OS=Burkholderia ambifaria (strain ATCC BAA-244 / AMMD) OX=339670 GN=Bamb_2444 PE=4 SV=1 - [Q0BCX3_BURCM]	74.47	50	1	2	2	2	88	9.97076	4.09424
Q0BHM4	Uncharacterized protein OS=Burkholderia ambifaria (strain ATCC BAA-244 / AMMD) OX=339670 GN=Bamb_0790 PE=4 SV=1 - [Q0BHM4_BURCM]	74.47	37.65	1	3	3	4	85	9.34698	10.0669
Q0B9K8	Beta-ketoacyl synthase OS=Burkholderia ambifaria (strain ATCC BAA-244 / AMMD) OX=339670 GN=Bamb_3611 PE=3 SV=1 - [Q0B9K8_BURCM]	74.44	6.85	1	2	2	3	409	43.7085	5.69385
Q0BIH8	GTPase Obg OS=Burkholderia ambifaria (strain ATCC BAA-244 / AMMD) OX=339670 GN=obg PE=3 SV=1 - [OBG_BURCM]	74.21	18.11	1	4	4	5	370	39.755	5.17334
Q0BBP6	Glycosyl transferase, family 3 OS=Burkholderia ambifaria (strain ATCC BAA-244 / AMMD) OX=339670 GN=Bamb_2871 PE=4 SV=1 - [Q0BBP6_BURCM]	74.18	8.13	1	2	2	3	332	35.4825	6.13818
Q0BAX9	ATP-dependent protease subunit HslV OS=Burkholderia ambifaria (strain ATCC BAA-244 / AMMD) OX=339670 GN=hslV PE=3 SV=1 - [HSLV_BURCM]	73.75	15.73	1	2	2	3	178	19.1309	6.34131
Q0BGU8	Succinylglutamate desuccinylase OS=Burkholderia ambifaria (strain ATCC BAA-244 / AMMD) OX=339670 GN=astE PE=3 SV=1 - [Q0BGU8_BURCM]	71.92	5.72	1	2	2	4	367	38.8709	6.02393
Q0B5P9	Uncharacterized protein OS=Burkholderia ambifaria (strain ATCC BAA-244 / AMMD) OX=339670 GN=Bamb_4975 PE=4 SV=1 - [Q0B5P9_BURCM]	70.91	32.08	1	3	4	7	159	18.6893	6.69775
Q0BB38	Lytic transglycosylase, catalytic OS=Burkholderia ambifaria (strain ATCC BAA-244 / AMMD) OX=339670 GN=Bamb_3079 PE=4 SV=1 - [Q0BB38_BURCM]	70.14	3.08	1	2	2	3	650	71.8894	7.84033
Q0BDQ6	Iron-sulfur cluster assembly protein IscA OS=Burkholderia ambifaria (strain ATCC BAA-244 / AMMD) OX=339670 GN=Bamb_2161 PE=3 SV=1 - [Q0BDQ6_BURCM]	69.9	19.67	1	2	2	3	122	13.4418	7.78174
Q0B5L1	Short-chain dehydrogenase/reductase SDR OS=Burkholderia ambifaria (strain ATCC BAA-244 / AMMD) OX=339670 GN=Bamb_5013 PE=4 SV=1 - [Q0B5L1_BURCM]	69.29	18.35	1	3	3	5	267	28.8447	7.34229
Q0BIJ6	Cell division protein FtsZ OS=Burkholderia ambifaria (strain ATCC BAA-244 / AMMD) OX=339670 GN=ftsZ PE=3 SV=1 - [Q0BIJ6_BURCM]	68.26	14.07	1	4	4	4	398	41.6429	5.0083
Q0B8P1	Uncharacterized protein OS=Burkholderia ambifaria (strain ATCC BAA-244 / AMMD) OX=339670 GN=Bamb_3928 PE=4 SV=1 - [Q0B8P1_BURCM]	67.86	39.1	1	4	4	5	133	14.3451	4.88135
Q0BD72	Integral membrane protein-like protein OS=Burkholderia ambifaria (strain ATCC BAA-244 / AMMD) OX=339670 GN=Bamb_2345 PE=4 SV=1 - [Q0BD72_BURCM]	67.76	19.05	1	3	3	4	126	14.0279	8.5874
Q0BGJ2	Ribosomal RNA large subunit methyltransferase E OS=Burkholderia ambifaria (strain ATCC BAA-244 / AMMD) OX=339670 GN=rlmE PE=3 SV=1 - [RLME_BURCM]	67.45	21.82	1	2	2	3	220	24.7879	8.38232
Q0BI39	FAD linked oxidase domain protein OS=Burkholderia ambifaria (strain ATCC BAA-244 / AMMD) OX=339670 GN=Bamb_0625 PE=4 SV=1 - [Q0BI39_BURCM]	67.43	11.51	1	3	3	3	469	50.4349	6.03662
Q0BF53	Transcriptional regulator, MerR family OS=Burkholderia ambifaria (strain ATCC BAA-244 / AMMD) OX=339670 GN=Bamb_1663 PE=4 SV=1 - [Q0BF53_BURCM]	66.81	11.37	1	4	4	5	343	38.793	7.02002
Q0BIW9	Histidinol-phosphate aminotransferase OS=Burkholderia ambifaria (strain ATCC BAA-244 / AMMD) OX=339670 GN=hisC PE=3 SV=1 - [Q0BIW9_BURCM]	66.61	9.24	1	2	3	3	357	38.2602	5.42725
Q0BHB5	Uncharacterized protein OS=Burkholderia ambifaria (strain ATCC BAA-244 / AMMD) OX=339670 GN=Bamb_0899 PE=4 SV=1 - [Q0BHB5_BURCM]	65.97	14.61	1	2	2	3	89	9.29579	9.34912
Q0BCH2	3-deoxy-manno-octulosonate cytidylyltransferase 1 OS=Burkholderia ambifaria (strain ATCC BAA-244 / AMMD) OX=339670 GN=kdsB1 PE=3 SV=1 - [KDSB1_BURCM]	65.5	16.35	1	2	2	3	263	28.5347	6.52197
Q0B9H8	Transcriptional regulator, TraR/DksA family OS=Burkholderia ambifaria (strain ATCC BAA-244 / AMMD) OX=339670 GN=Bamb_3641 PE=4 SV=1 - [Q0B9H8_BURCM]	65.45	20.77	1	2	2	2	130	14.6301	5.09717
Q0BI91	50S ribosomal protein L13 OS=Burkholderia ambifaria (strain ATCC BAA-244 / AMMD) OX=339670 GN=rplM PE=3 SV=1 - [RL13_BURCM]	65.37	26.06	1	2	3	5	142	15.9745	9.89111
Q0BF03	Uncharacterized protein OS=Burkholderia ambifaria (strain ATCC BAA-244 / AMMD) OX=339670 GN=Bamb_1714 PE=4 SV=1 - [Q0BF03_BURCM]	65.21	18.47	1	2	2	3	157	16.1503	9.24658
Q0BES8	Molybdopterin synthase sulfur carrier subunit OS=Burkholderia ambifaria (strain ATCC BAA-244 / AMMD) OX=339670 GN=moaD PE=3 SV=1 - [Q0BES8_BURCM]	65.01	41.18	1	2	2	3	85	9.20354	4.93213
Q0BEG0	Arylesterase OS=Burkholderia ambifaria (strain ATCC BAA-244 / AMMD) OX=339670 GN=Bamb_1907 PE=4 SV=1 - [Q0BEG0_BURCM]	64.92	8.44	1	1	2	3	225	24.195	9.86182
Q0BG98	OsmC family protein OS=Burkholderia ambifaria (strain ATCC BAA-244 / AMMD) OX=339670 GN=Bamb_1267 PE=4 SV=1 - [Q0BG98_BURCM]	64.83	53.08	1	4	4	6	130	13.8282	5.97314
Q0B2P7	Homodimeric dihydroxyacetone kinase OS=Burkholderia ambifaria (strain ATCC BAA-244 / AMMD) OX=339670 GN=Bamb_6032 PE=4 SV=1 - [Q0B2P7_BURCM]	64.55	4.02	1	1	2	3	572	58.3014	6.0874
Q0BC82	Cyclic pyranopterin monophosphate synthase OS=Burkholderia ambifaria (strain ATCC BAA-244 / AMMD) OX=339670 GN=moaC PE=3 SV=1 - [MOAC_BURCM]	63.56	20.99	1	2	2	3	162	17.1689	7.45947
Q0BCA2	Two component transcriptional regulator, winged helix family OS=Burkholderia ambifaria (strain ATCC BAA-244 / AMMD) OX=339670 GN=Bamb_2665 PE=4 SV=1 - [Q0BCA2_BURCM]	63.52	13.18	1	2	2	3	220	23.9079	6.37939
Q0B7L0	Uncharacterized protein OS=Burkholderia ambifaria (strain ATCC BAA-244 / AMMD) OX=339670 GN=Bamb_4311 PE=4 SV=1 - [Q0B7L0_BURCM]	63.45	8.24	1	2	2	4	255	27.9161	5.77002
Q0BHF4	DNA-directed RNA polymerase subunit omega OS=Burkholderia ambifaria (strain ATCC BAA-244 / AMMD) OX=339670 GN=rpoZ PE=3 SV=1 - [RPOZ_BURCM]	63.44	28.36	1	2	2	4	67	7.42409	9.71533
Q0B882	Uncharacterized protein OS=Burkholderia ambifaria (strain ATCC BAA-244 / AMMD) OX=339670 GN=Bamb_4088 PE=4 SV=1 - [Q0B882_BURCM]	63.34	21.8	1	2	2	2	133	13.9232	6.63916
Q0B8L3	Aldo/keto reductase OS=Burkholderia ambifaria (strain ATCC BAA-244 / AMMD) OX=339670 GN=Bamb_3956 PE=4 SV=1 - [Q0B8L3_BURCM]	63.21	7.06	1	2	2	3	326	36.0782	5.98584
Q0BIG3	17 kDa surface antigen OS=Burkholderia ambifaria (strain ATCC BAA-244 / AMMD) OX=339670 GN=Bamb_0501 PE=4 SV=1 - [Q0BIG3_BURCM]	62.91	13.38	1	2	2	3	157	15.377	9.56885
Q0BDQ4	Cysteine desulfurase IscS OS=Burkholderia ambifaria (strain ATCC BAA-244 / AMMD) OX=339670 GN=iscS PE=3 SV=1 - [Q0BDQ4_BURCM]	62.89	8.35	1	2	2	3	407	45.4562	5.98584
Q0BFJ2	Fimbrial protein OS=Burkholderia ambifaria (strain ATCC BAA-244 / AMMD) OX=339670 GN=Bamb_1523 PE=4 SV=1 - [Q0BFJ2_BURCM]	62.36	17.65	1	2	2	3	170	17.3317	6.62451
Q0BBD7	Aminotransferase OS=Burkholderia ambifaria (strain ATCC BAA-244 / AMMD) OX=339670 GN=Bamb_2980 PE=3 SV=1 - [Q0BBD7_BURCM]	62.33	8.06	1	2	2	3	459	50.2114	6.30322
Q0B772	5-carboxymethyl-2-hydroxymuconate delta-isomerase OS=Burkholderia ambifaria (strain ATCC BAA-244 / AMMD) OX=339670 GN=Bamb_4450 PE=4 SV=1 - [Q0B772_BURCM]	62.01	8.21	1	1	2	2	280	30.2554	5.38916
Q0BBL5	Cytochrome c oxidase subunit 2 OS=Burkholderia ambifaria (strain ATCC BAA-244 / AMMD) OX=339670 GN=Bamb_2902 PE=3 SV=1 - [Q0BBL5_BURCM]	61.28	12.71	1	5	5	5	535	56.4621	7.18115
Q0BGK0	Lytic transglycosylase, catalytic OS=Burkholderia ambifaria (strain ATCC BAA-244 / AMMD) OX=339670 GN=Bamb_1165 PE=4 SV=1 - [Q0BGK0_BURCM]	60.98	6.05	1	3	3	4	529	57.5837	9.46631
Q0B958	Uncharacterized protein OS=Burkholderia ambifaria (strain ATCC BAA-244 / AMMD) OX=339670 GN=Bamb_3761 PE=4 SV=1 - [Q0B958_BURCM]	60.38	18.56	1	1	2	3	97	10.6012	4.86865
Q0BJI3	L-serine ammonia-lyase OS=Burkholderia ambifaria (strain ATCC BAA-244 / AMMD) OX=339670 GN=Bamb_0129 PE=4 SV=1 - [Q0BJI3_BURCM]	59.63	17.32	1	5	5	8	462	48.7598	6.11279
Q0BC17	Transporter-associated region OS=Burkholderia ambifaria (strain ATCC BAA-244 / AMMD) OX=339670 GN=Bamb_2750 PE=4 SV=1 - [Q0BC17_BURCM]	59.34	11.86	1	3	3	4	295	33.7531	4.85596
Q0BFX6	GTP-binding protein TypA OS=Burkholderia ambifaria (strain ATCC BAA-244 / AMMD) OX=339670 GN=Bamb_1389 PE=4 SV=1 - [Q0BFX6_BURCM]	59.33	4.11	1	2	2	3	608	67.465	5.47803
Q0B3Z6	Alcohol dehydrogenase, zinc-binding domain protein OS=Burkholderia ambifaria (strain ATCC BAA-244 / AMMD) OX=339670 GN=Bamb_5580 PE=3 SV=1 - [Q0B3Z6_BURCM]	58.45	27.2	1	5	5	6	375	38.593	6.31592
Q0BB80	Gamma-glutamyl-gamma-aminobutyraldehyde dehydrogenase OS=Burkholderia ambifaria (strain ATCC BAA-244 / AMMD) OX=339670 GN=Bamb_3037 PE=3 SV=1 - [Q0BB80_BURCM]	57.7	9.88	1	3	3	5	496	52.7412	5.49072
Q0BD77	Uncharacterized protein OS=Burkholderia ambifaria (strain ATCC BAA-244 / AMMD) OX=339670 GN=Bamb_2340 PE=4 SV=1 - [Q0BD77_BURCM]	57.51	25.58	1	2	2	4	129	14.5943	5.87158
Q0B522	Aminotransferase, class V OS=Burkholderia ambifaria (strain ATCC BAA-244 / AMMD) OX=339670 GN=Bamb_5203 PE=3 SV=1 - [Q0B522_BURCM]	57.4	4.66	1	2	2	3	494	51.7607	6.91748
Q0BEQ0	2-hydroxy-3-oxopropionate reductase OS=Burkholderia ambifaria (strain ATCC BAA-244 / AMMD) OX=339670 GN=Bamb_1817 PE=4 SV=1 - [Q0BEQ0_BURCM]	57.14	14.14	1	3	3	4	297	31.2582	6.43018
Q0BG49	Two component transcriptional regulator, winged helix family OS=Burkholderia ambifaria (strain ATCC BAA-244 / AMMD) OX=339670 GN=Bamb_1316 PE=4 SV=1 - [Q0BG49_BURCM]	56.32	20.09	1	3	3	5	234	26.5718	6.7124
Q0B6W9	Hydroxypyruvate isomerase OS=Burkholderia ambifaria (strain ATCC BAA-244 / AMMD) OX=339670 GN=Bamb_4554 PE=3 SV=1 - [Q0B6W9_BURCM]	55.93	10.08	1	2	2	3	258	28.8063	5.90967
Q0BBE8	Sporulation domain protein OS=Burkholderia ambifaria (strain ATCC BAA-244 / AMMD) OX=339670 GN=Bamb_2969 PE=4 SV=1 - [Q0BBE8_BURCM]	55.54	11.86	1	3	3	5	295	30.6727	9.99365
Q0B6P7	Uncharacterized protein OS=Burkholderia ambifaria (strain ATCC BAA-244 / AMMD) OX=339670 GN=Bamb_4626 PE=4 SV=1 - [Q0B6P7_BURCM]	55.53	4.2	1	2	2	2	500	51.6478	9.70068
Q0BAU6	2-dehydro-3-deoxyglucarate aldolase OS=Burkholderia ambifaria (strain ATCC BAA-244 / AMMD) OX=339670 GN=Bamb_3171 PE=3 SV=1 - [Q0BAU6_BURCM]	54.61	14.56	1	2	2	2	261	28.0052	6.01123
Q0BDH6	Pirin domain protein OS=Burkholderia ambifaria (strain ATCC BAA-244 / AMMD) OX=339670 GN=Bamb_2241 PE=3 SV=1 - [Q0BDH6_BURCM]	54.17	20.69	1	4	4	5	290	31.775	5.8208
Q0BEC4	Amidohydrolase OS=Burkholderia ambifaria (strain ATCC BAA-244 / AMMD) OX=339670 GN=Bamb_1943 PE=4 SV=1 - [Q0BEC4_BURCM]	53.99	8.72	1	3	3	3	470	50.6668	6.354
Q0BIR9	Uncharacterized protein OS=Burkholderia ambifaria (strain ATCC BAA-244 / AMMD) OX=339670 GN=Bamb_0395 PE=4 SV=1 - [Q0BIR9_BURCM]	53.62	6.81	1	2	2	4	323	32.2044	9.46631
Q0BCT0	Acetyl-CoA carboxylase carboxyltransferase subunit alpha OS=Burkholderia ambifaria (strain ATCC BAA-244 / AMMD) OX=339670 GN=Bamb_2487 PE=4 SV=1 - [Q0BCT0_BURCM]	53.32	53.23	1	3	3	3	62	7.51877	6.66846
Q0BJD7	Response regulator receiver protein OS=Burkholderia ambifaria (strain ATCC BAA-244 / AMMD) OX=339670 GN=Bamb_0175 PE=4 SV=1 - [Q0BJD7_BURCM]	53.16	22.14	1	2	2	2	131	14.1874	6.13818
Q0BFG1	Uroporphyrinogen-III C-methyltransferase OS=Burkholderia ambifaria (strain ATCC BAA-244 / AMMD) OX=339670 GN=Bamb_1554 PE=3 SV=1 - [Q0BFG1_BURCM]	53.07	10.54	1	2	2	3	294	30.5153	10.2427
Q0B933	UspA domain protein OS=Burkholderia ambifaria (strain ATCC BAA-244 / AMMD) OX=339670 GN=Bamb_3786 PE=4 SV=1 - [Q0B933_BURCM]	53.03	6.75	1	2	2	3	311	33.0205	6.75635
Q0BD79	Maf-like protein Bamb_2338 OS=Burkholderia ambifaria (strain ATCC BAA-244 / AMMD) OX=339670 GN=Bamb_2338 PE=3 SV=1 - [Q0BD79_BURCM]	52.57	12.28	1	2	2	3	228	24.2617	6.3667
Q0B385	Catalase-peroxidase 2 OS=Burkholderia ambifaria (strain ATCC BAA-244 / AMMD) OX=339670 GN=katG2 PE=3 SV=1 - [KATG2_BURCM]	51.98	3.24	1	2	2	3	741	80.8596	7.04932
Q0BIS6	ImpA domain protein OS=Burkholderia ambifaria (strain ATCC BAA-244 / AMMD) OX=339670 GN=Bamb_0388 PE=4 SV=1 - [Q0BIS6_BURCM]	50.84	9.38	1	2	3	6	373	41.5778	4.79248
Q0BBD5	ATP-dependent dethiobiotin synthetase BioD OS=Burkholderia ambifaria (strain ATCC BAA-244 / AMMD) OX=339670 GN=bioD PE=3 SV=1 - [BIOD_BURCM]	50.03	11.3	1	2	2	3	239	25.0421	5.70654
Q0BGL6	Acetyl-CoA carboxylase beta subunit OS=Burkholderia ambifaria (strain ATCC BAA-244 / AMMD) OX=339670 GN=Bamb_1149 PE=4 SV=1 - [Q0BGL6_BURCM]	49.75	16.72	1	3	3	3	311	33.0157	5.18604
Q0B116	DNA topoisomerase III OS=Burkholderia ambifaria (strain ATCC BAA-244 / AMMD) OX=339670 GN=Bamb_6614 PE=4 SV=1 - [Q0B116_BURCM]	49.66	5.39	1	3	3	3	687	74.8225	8.47021
Q0BBH2	Ferredoxin-like protein OS=Burkholderia ambifaria (strain ATCC BAA-244 / AMMD) OX=339670 GN=Bamb_2945 PE=4 SV=1 - [Q0BBH2_BURCM]	49.65	29.52	1	2	2	2	105	11.9428	6.29053
Q0BGQ5	Transcriptional regulator, XRE family OS=Burkholderia ambifaria (strain ATCC BAA-244 / AMMD) OX=339670 GN=Bamb_1109 PE=4 SV=1 - [Q0BGQ5_BURCM]	49.4	36.56	1	2	2	3	93	10.2724	8.60205
Q0BEL8	Uncharacterized protein OS=Burkholderia ambifaria (strain ATCC BAA-244 / AMMD) OX=339670 GN=Bamb_1849 PE=4 SV=1 - [Q0BEL8_BURCM]	49.21	15.57	1	2	2	2	244	27.285	4.99561
Q0BJ66	Phenylacetate-CoA oxygenase, PaaI subunit OS=Burkholderia ambifaria (strain ATCC BAA-244 / AMMD) OX=339670 GN=Bamb_0247 PE=4 SV=1 - [Q0BJ66_BURCM]	49.13	13.48	1	2	2	3	267	29.4357	5.33838
Q0B8Z1	Aldehyde oxidase and xanthine dehydrogenase, molybdopterin binding protein OS=Burkholderia ambifaria (strain ATCC BAA-244 / AMMD) OX=339670 GN=Bamb_3828 PE=4 SV=1 - [Q0B8Z1_BURCM]	48.77	6.36	1	2	2	2	739	78.3439	8.79248
Q0BE39	Uncharacterized protein OS=Burkholderia ambifaria (strain ATCC BAA-244 / AMMD) OX=339670 GN=Bamb_2028 PE=4 SV=1 - [Q0BE39_BURCM]	48.54	18.5	1	2	2	3	227	24.246	5.33838
Q0B7B1	Serine/threonine protein kinase OS=Burkholderia ambifaria (strain ATCC BAA-244 / AMMD) OX=339670 GN=Bamb_4410 PE=4 SV=1 - [Q0B7B1_BURCM]	48.17	5.33	1	2	2	3	469	50.1538	6.48096
Q0BCT9	Uncharacterized protein OS=Burkholderia ambifaria (strain ATCC BAA-244 / AMMD) OX=339670 GN=Bamb_2478 PE=4 SV=1 - [Q0BCT9_BURCM]	47.97	11.24	1	2	2	3	267	28.6796	9.75928
Q0BIP4	HAD-superfamily hydrolase, subfamily IA, variant 3 OS=Burkholderia ambifaria (strain ATCC BAA-244 / AMMD) OX=339670 GN=Bamb_0420 PE=4 SV=1 - [Q0BIP4_BURCM]	47.97	12.56	1	2	2	3	207	23.2608	5.71924
Q0B5Z8	4-hydroxy-3-methylbut-2-enyl diphosphate reductase OS=Burkholderia ambifaria (strain ATCC BAA-244 / AMMD) OX=339670 GN=ispH PE=3 SV=1 - [Q0B5Z8_BURCM]	46.96	6.39	1	2	2	4	313	33.6856	5.41455
Q0BH03	GTPase Era OS=Burkholderia ambifaria (strain ATCC BAA-244 / AMMD) OX=339670 GN=era PE=3 SV=1 - [Q0BH03_BURCM]	46.94	7.02	1	2	2	3	299	33.6146	8.06006
Q0B4Y4	Transcriptional regulator, LysR family OS=Burkholderia ambifaria (strain ATCC BAA-244 / AMMD) OX=339670 GN=Bamb_5241 PE=4 SV=1 - [Q0B4Y4_BURCM]	46.65	8.2	1	2	2	2	317	35.0958	5.17334
Q0BH87	UDP-glucose 6-dehydrogenase OS=Burkholderia ambifaria (strain ATCC BAA-244 / AMMD) OX=339670 GN=Bamb_0927 PE=3 SV=1 - [Q0BH87_BURCM]	46.52	9.44	1	3	3	4	466	50.556	5.87158
Q0B988	Uncharacterized protein OS=Burkholderia ambifaria (strain ATCC BAA-244 / AMMD) OX=339670 GN=Bamb_3731 PE=4 SV=1 - [Q0B988_BURCM]	46.41	25.81	1	3	3	5	124	13.1235	8.76318
Q0B6C8	Alkyl hydroperoxide reductase AhpD OS=Burkholderia ambifaria (strain ATCC BAA-244 / AMMD) OX=339670 GN=Bamb_4745 PE=3 SV=1 - [Q0B6C8_BURCM]	46.36	11.98	1	2	2	3	192	21.3117	6.53662
Q0BB92	Short-chain dehydrogenase/reductase SDR OS=Burkholderia ambifaria (strain ATCC BAA-244 / AMMD) OX=339670 GN=Bamb_3025 PE=4 SV=1 - [Q0BB92_BURCM]	46	14.98	1	2	2	4	247	24.2606	5.78271
Q0BI17	Chaperone protein DnaJ OS=Burkholderia ambifaria (strain ATCC BAA-244 / AMMD) OX=339670 GN=dnaJ PE=3 SV=1 - [DNAJ_BURCM]	45.78	5.56	1	2	2	4	378	40.815	7.1665
Q0BD46	ATPase associated with various cellular activities, AAA_5 OS=Burkholderia ambifaria (strain ATCC BAA-244 / AMMD) OX=339670 GN=Bamb_2371 PE=4 SV=1 - [Q0BD46_BURCM]	45.25	7.5	1	2	2	3	280	31.9729	6.25244
Q0BHM6	Rhodanese domain protein OS=Burkholderia ambifaria (strain ATCC BAA-244 / AMMD) OX=339670 GN=Bamb_0788 PE=4 SV=1 - [Q0BHM6_BURCM]	45.24	52.34	1	3	3	3	107	11.9299	4.84326
Q0BA95	Porin, Gram-negative type OS=Burkholderia ambifaria (strain ATCC BAA-244 / AMMD) OX=339670 GN=Bamb_3374 PE=4 SV=1 - [Q0BA95_BURCM]	44.64	8.05	1	2	2	4	385	40.0019	8.55811
Q0BE23	Outer membrane protein assembly factor BamA OS=Burkholderia ambifaria (strain ATCC BAA-244 / AMMD) OX=339670 GN=bamA PE=3 SV=1 - [Q0BE23_BURCM]	43.92	2.99	1	2	2	3	768	84.8425	8.95361
Q0BIP5	Isochorismatase hydrolase OS=Burkholderia ambifaria (strain ATCC BAA-244 / AMMD) OX=339670 GN=Bamb_0419 PE=4 SV=1 - [Q0BIP5_BURCM]	43.68	17.49	1	3	3	4	183	19.904	6.07471
Q0B846	Uncharacterized protein OS=Burkholderia ambifaria (strain ATCC BAA-244 / AMMD) OX=339670 GN=Bamb_4124 PE=4 SV=1 - [Q0B846_BURCM]	42.92	53.21	1	2	2	2	109	11.5938	5.31299
Q0BA54	Uncharacterized protein OS=Burkholderia ambifaria (strain ATCC BAA-244 / AMMD) OX=339670 GN=Bamb_3415 PE=4 SV=1 - [Q0BA54_BURCM]	42.88	34.81	1	3	3	5	135	14.8344	6.07471
Q0BC14	Glycine--tRNA ligase alpha subunit OS=Burkholderia ambifaria (strain ATCC BAA-244 / AMMD) OX=339670 GN=glyQ PE=3 SV=1 - [Q0BC14_BURCM]	42.71	17.66	1	3	3	5	334	38.0201	4.93213
Q0BJV8	GTPase subunit of restriction endonuclease-like protein OS=Burkholderia ambifaria (strain ATCC BAA-244 / AMMD) OX=339670 GN=Bamb_0004 PE=4 SV=1 - [Q0BJV8_BURCM]	42.51	2.63	1	1	2	3	914	103.053	5.61768
Q0BI66	Putative RNA methylase OS=Burkholderia ambifaria (strain ATCC BAA-244 / AMMD) OX=339670 GN=Bamb_0598 PE=3 SV=1 - [Q0BI66_BURCM]	42.14	9.95	1	3	3	4	432	47.1704	9.02686
Q0BC42	Uncharacterized protein OS=Burkholderia ambifaria (strain ATCC BAA-244 / AMMD) OX=339670 GN=Bamb_2725 PE=4 SV=1 - [Q0BC42_BURCM]	42.01	7.64	1	2	2	2	275	31.9221	6.53662
Q0BC15	Tetratricopeptide TPR_2 repeat protein OS=Burkholderia ambifaria (strain ATCC BAA-244 / AMMD) OX=339670 GN=Bamb_2752 PE=4 SV=1 - [Q0BC15_BURCM]	41.52	4.59	1	2	2	3	545	58.683	6.44287
Q0B3B9	Amidohydrolase 3 OS=Burkholderia ambifaria (strain ATCC BAA-244 / AMMD) OX=339670 GN=Bamb_5808 PE=4 SV=1 - [Q0B3B9_BURCM]	39.82	6.35	2	2	2	2	630	68.8805	6.17627
Q0BFS3	Two component transcriptional regulator, winged helix family OS=Burkholderia ambifaria (strain ATCC BAA-244 / AMMD) OX=339670 GN=Bamb_1442 PE=4 SV=1 - [Q0BFS3_BURCM]	39.52	10.57	1	2	2	3	227	25.4793	6.02393
Q0BDJ6	3-carboxymuconate cyclase-like protein OS=Burkholderia ambifaria (strain ATCC BAA-244 / AMMD) OX=339670 GN=Bamb_2221 PE=4 SV=1 - [Q0BDJ6_BURCM]	38.27	7.16	1	2	2	2	349	36.6606	6.37939
Q0BEN7	Thymidylate kinase OS=Burkholderia ambifaria (strain ATCC BAA-244 / AMMD) OX=339670 GN=tmk PE=3 SV=1 - [KTHY_BURCM]	38.08	17.48	1	3	3	4	206	23.0429	5.99854
Q0B7D6	Acyl-CoA dehydrogenase domain protein OS=Burkholderia ambifaria (strain ATCC BAA-244 / AMMD) OX=339670 GN=Bamb_4385 PE=3 SV=1 - [Q0B7D6_BURCM]	37.98	9.81	1	2	2	4	377	40.5295	6.13818
Q0BEA2	Exonuclease, RNase T and DNA polymerase III OS=Burkholderia ambifaria (strain ATCC BAA-244 / AMMD) OX=339670 GN=Bamb_1965 PE=4 SV=1 - [Q0BEA2_BURCM]	37.32	13.33	1	2	2	3	180	20.061	5.35107
Q0B5V6	L-arabinonolactonase OS=Burkholderia ambifaria (strain ATCC BAA-244 / AMMD) OX=339670 GN=Bamb_4918 PE=4 SV=1 - [Q0B5V6_BURCM]	37.05	14.05	1	3	3	3	299	32.0227	4.94482
Q0B5Y4	Short-chain dehydrogenase/reductase SDR OS=Burkholderia ambifaria (strain ATCC BAA-244 / AMMD) OX=339670 GN=Bamb_4890 PE=4 SV=1 - [Q0B5Y4_BURCM]	36.26	19.69	1	3	3	4	254	26.0194	6.20166
Q0BGX6	Glycosyl transferase, group 1 OS=Burkholderia ambifaria (strain ATCC BAA-244 / AMMD) OX=339670 GN=Bamb_1038 PE=4 SV=1 - [Q0BGX6_BURCM]	36.2	15.25	1	2	2	2	354	39.7007	6.20166
Q0BIU4	Uncharacterized protein OS=Burkholderia ambifaria (strain ATCC BAA-244 / AMMD) OX=339670 GN=Bamb_0369 PE=4 SV=1 - [Q0BIU4_BURCM]	35.81	16.54	1	2	2	2	127	14.7284	5.021
Q0BHQ6	Glycosyl transferase, group 1 OS=Burkholderia ambifaria (strain ATCC BAA-244 / AMMD) OX=339670 GN=Bamb_0758 PE=4 SV=1 - [Q0BHQ6_BURCM]	35.41	2.26	1	2	2	3	1241	139.268	6.20166
Q0BEA1	Uncharacterized protein OS=Burkholderia ambifaria (strain ATCC BAA-244 / AMMD) OX=339670 GN=Bamb_1966 PE=4 SV=1 - [Q0BEA1_BURCM]	33.83	6.98	1	2	2	2	387	42.6333	7.25439
Q0BCW0	Glutamine-dependent NAD(+) synthetase OS=Burkholderia ambifaria (strain ATCC BAA-244 / AMMD) OX=339670 GN=nadE PE=3 SV=1 - [Q0BCW0_BURCM]	33.28	5.56	1	2	2	3	576	61.9048	5.35107
Q0BFJ0	Pili assembly chaperone OS=Burkholderia ambifaria (strain ATCC BAA-244 / AMMD) OX=339670 GN=Bamb_1525 PE=3 SV=1 - [Q0BFJ0_BURCM]	32.22	13.71	1	2	2	3	248	27.1311	7.91357
Q0BFG4	Cobyrinate a,c-diamide synthase OS=Burkholderia ambifaria (strain ATCC BAA-244 / AMMD) OX=339670 GN=cbiA PE=3 SV=1 - [Q0BFG4_BURCM]	31.57	7.82	1	2	2	2	435	45.4685	6.7124
Q0B2T9	Uncharacterized protein OS=Burkholderia ambifaria (strain ATCC BAA-244 / AMMD) OX=339670 GN=Bamb_5990 PE=4 SV=1 - [Q0B2T9_BURCM]	29.97	18.54	1	2	2	3	151	16.7528	7.06396
Q0BBZ9	Uncharacterized protein OS=Burkholderia ambifaria (strain ATCC BAA-244 / AMMD) OX=339670 GN=Bamb_2768 PE=4 SV=1 - [Q0BBZ9_BURCM]	29.11	26.25	1	2	2	2	160	18.4744	5.05908
Q0BAT9	Sun protein OS=Burkholderia ambifaria (strain ATCC BAA-244 / AMMD) OX=339670 GN=Bamb_3178 PE=3 SV=1 - [Q0BAT9_BURCM]	27.75	5.19	1	2	2	2	462	49.3819	8.47021
Q0BH56	Dihydrofolate reductase OS=Burkholderia ambifaria (strain ATCC BAA-244 / AMMD) OX=339670 GN=Bamb_0958 PE=3 SV=1 - [Q0BH56_BURCM]	27.29	14.36	1	2	2	2	195	21.265	9.24658
Q0BCP7	Sulfate adenylyltransferase subunit 1 OS=Burkholderia ambifaria (strain ATCC BAA-244 / AMMD) OX=339670 GN=Bamb_2520 PE=3 SV=1 - [Q0BCP7_BURCM]	27.14	8.68	1	2	2	2	438	47.6528	5.45264
Q0B6U1	Uncharacterized protein OS=Burkholderia ambifaria (strain ATCC BAA-244 / AMMD) OX=339670 GN=Bamb_4582 PE=4 SV=1 - [Q0B6U1_BURCM]	26.95	5.79	1	2	2	2	380	42.6114	5.52881
Q0BGW4	Radical SAM domain protein OS=Burkholderia ambifaria (strain ATCC BAA-244 / AMMD) OX=339670 GN=Bamb_1050 PE=4 SV=1 - [Q0BGW4_BURCM]	26.76	6.13	1	2	2	3	473	53.9154	7.7085
Q0B6J7	Probable 5-dehydro-4-deoxyglucarate dehydratase OS=Burkholderia ambifaria (strain ATCC BAA-244 / AMMD) OX=339670 GN=Bamb_4676 PE=3 SV=1 - [Q0B6J7_BURCM]	26.58	9.54	1	2	2	2	304	33.0011	5.92236
Q0BGA6	Cellulase OS=Burkholderia ambifaria (strain ATCC BAA-244 / AMMD) OX=339670 GN=Bamb_1259 PE=4 SV=1 - [Q0BGA6_BURCM]	26	10.34	1	3	3	3	406	43.2651	9.40771
Q0BHV9	D-isomer specific 2-hydroxyacid dehydrogenase, NAD-binding protein OS=Burkholderia ambifaria (strain ATCC BAA-244 / AMMD) OX=339670 GN=Bamb_0705 PE=3 SV=1 - [Q0BHV9_BURCM]	25.28	6.33	1	1	2	3	332	36.0876	6.27783
Q0B7V9	Aldehyde oxidase and xanthine dehydrogenase, molybdopterin binding protein OS=Burkholderia ambifaria (strain ATCC BAA-244 / AMMD) OX=339670 GN=Bamb_4211 PE=4 SV=1 - [Q0B7V9_BURCM]	24.93	2.45	1	2	2	3	736	77.4541	8.95361
Q0BCX1	Two component transcriptional regulator, winged helix family OS=Burkholderia ambifaria (strain ATCC BAA-244 / AMMD) OX=339670 GN=Bamb_2446 PE=4 SV=1 - [Q0BCX1_BURCM]	24.75	16.33	1	2	2	3	251	28.287	6.56592
Q0BE34	SPFH domain, Band 7 family protein OS=Burkholderia ambifaria (strain ATCC BAA-244 / AMMD) OX=339670 GN=Bamb_2033 PE=4 SV=1 - [Q0BE34_BURCM]	24.67	11.25	1	2	2	3	311	33.585	8.104
Q0BC45	Cytochrome c, class I OS=Burkholderia ambifaria (strain ATCC BAA-244 / AMMD) OX=339670 GN=Bamb_2722 PE=4 SV=1 - [Q0BC45_BURCM]	24.56	6.94	1	2	2	3	432	46.7112	8.19189
Q0BED0	TPR repeat protein OS=Burkholderia ambifaria (strain ATCC BAA-244 / AMMD) OX=339670 GN=Bamb_1937 PE=4 SV=1 - [Q0BED0_BURCM]	23.89	3.28	1	2	2	2	396	42.4564	5.65576
Q0B5K7	3-oxoadipate CoA-transferase alpha subunit OS=Burkholderia ambifaria (strain ATCC BAA-244 / AMMD) OX=339670 GN=Bamb_5017 PE=4 SV=1 - [Q0B5K7_BURCM]	23.34	19.33	1	2	2	2	238	25.0982	7.50342
Q0BI37	Globin OS=Burkholderia ambifaria (strain ATCC BAA-244 / AMMD) OX=339670 GN=Bamb_0627 PE=3 SV=1 - [Q0BI37_BURCM]	22.63	8.21	1	3	3	3	402	43.7294	6.69775
Q0BAR1	Glyoxalase/bleomycin resistance protein/dioxygenase OS=Burkholderia ambifaria (strain ATCC BAA-244 / AMMD) OX=339670 GN=Bamb_3206 PE=4 SV=1 - [Q0BAR1_BURCM]	22.24	24.48	1	2	2	2	143	15.2536	5.49072
Q0BGI9	Phosphoglucosamine mutase OS=Burkholderia ambifaria (strain ATCC BAA-244 / AMMD) OX=339670 GN=glmM PE=3 SV=1 - [GLMM_BURCM]	21.62	5.76	1	2	2	2	451	47.2736	6.21436
Q0BGG3	Peptidase M23B OS=Burkholderia ambifaria (strain ATCC BAA-244 / AMMD) OX=339670 GN=Bamb_1202 PE=4 SV=1 - [Q0BGG3_BURCM]	21.04	7.39	1	1	2	2	230	23.8904	9.89111
Q0BIX8	VacJ family lipoprotein OS=Burkholderia ambifaria (strain ATCC BAA-244 / AMMD) OX=339670 GN=Bamb_0335 PE=4 SV=1 - [Q0BIX8_BURCM]	20.75	9.66	1	2	2	2	321	32.995	8.08936
Q0BDR8	TatD-related deoxyribonuclease OS=Burkholderia ambifaria (strain ATCC BAA-244 / AMMD) OX=339670 GN=Bamb_2149 PE=4 SV=1 - [Q0BDR8_BURCM]	18.57	8.02	1	2	2	2	262	28.6688	6.27783
Q0BIK3	UDP-N-acetylmuramoylalanine--D-glutamate ligase OS=Burkholderia ambifaria (strain ATCC BAA-244 / AMMD) OX=339670 GN=murD PE=3 SV=1 - [MURD_BURCM]	17.68	6.57	1	2	2	2	502	52.7614	5.5542
Q0BJB8	Pyridoxamine 5'-phosphate oxidase-related, FMN-binding protein OS=Burkholderia ambifaria (strain ATCC BAA-244 / AMMD) OX=339670 GN=Bamb_0194 PE=4 SV=1 - [Q0BJB8_BURCM]	17.19	8.87	1	2	2	3	248	27.205	7.21045
Q0BI51	S-adenosylmethionine:tRNA ribosyltransferase-isomerase OS=Burkholderia ambifaria (strain ATCC BAA-244 / AMMD) OX=339670 GN=queA PE=3 SV=1 - [QUEA_BURCM]	16.45	5.35	1	1	2	2	355	39.0661	6.06201
Q0B681	Glutathione S-transferase, N-terminal domain protein OS=Burkholderia ambifaria (strain ATCC BAA-244 / AMMD) OX=339670 GN=Bamb_4793 PE=1 SV=1 - [Q0B681_BURCM]	14.93	10.14	1	1	2	2	207	23.1298	6.39209

## Sheet: 6h_2
Accession	Description	Score	Coverage	# Proteins	# Unique Peptides	# Peptides	# PSMs	# AAs	MW [kDa]	calc. pI
Q0BHT1	60 kDa chaperonin 1 OS=Burkholderia ambifaria (strain ATCC BAA-244 / AMMD) OX=339670 GN=groL1 PE=3 SV=1 - [CH601_BURCM]	6988.81	73.81	1	29	33	208	546	57.0168	5.17334
Q0B6P3	Aldehyde dehydrogenase OS=Burkholderia ambifaria (strain ATCC BAA-244 / AMMD) OX=339670 GN=Bamb_4630 PE=4 SV=1 - [Q0B6P3_BURCM]	6423.33	61.83	1	24	24	174	503	54.0589	6.32861
Q0BJC6	Adenosylhomocysteinase OS=Burkholderia ambifaria (strain ATCC BAA-244 / AMMD) OX=339670 GN=ahcY PE=3 SV=1 - [Q0BJC6_BURCM]	5330.36	83.47	1	28	28	174	472	52.1014	6.15088
Q0BI18	Chaperone protein DnaK OS=Burkholderia ambifaria (strain ATCC BAA-244 / AMMD) OX=339670 GN=dnaK PE=3 SV=1 - [DNAK_BURCM]	5017.22	68.46	1	35	35	140	650	69.8161	5.021
Q0BAF9	Malate dehydrogenase OS=Burkholderia ambifaria (strain ATCC BAA-244 / AMMD) OX=339670 GN=mdh PE=3 SV=1 - [MDH_BURCM]	4207.28	83.23	1	25	25	123	328	35.0934	6.01123
Q0B7H6	Lysine decarboxylase OS=Burkholderia ambifaria (strain ATCC BAA-244 / AMMD) OX=339670 GN=Bamb_4345 PE=4 SV=1 - [Q0B7H6_BURCM]	4118.84	83.95	1	42	42	162	779	85.897	6.07471
Q0BEG5	Phosphoribosylformylglycinamidine synthase OS=Burkholderia ambifaria (strain ATCC BAA-244 / AMMD) OX=339670 GN=purL PE=3 SV=1 - [Q0BEG5_BURCM]	4110.93	57.9	1	51	51	125	1354	145.789	5.42725
Q0BIC5	Glyceraldehyde-3-phosphate dehydrogenase OS=Burkholderia ambifaria (strain ATCC BAA-244 / AMMD) OX=339670 GN=Bamb_0539 PE=3 SV=1 - [Q0BIC5_BURCM]	3926.48	85.71	1	22	22	117	336	36.1896	6.69775
Q0BJI1	Glycine dehydrogenase (decarboxylating) OS=Burkholderia ambifaria (strain ATCC BAA-244 / AMMD) OX=339670 GN=gcvP PE=3 SV=1 - [GCSP_BURCM]	3869.55	65.74	1	36	36	141	975	104.33	6.39209
Q0BAG3	Aconitate hydratase OS=Burkholderia ambifaria (strain ATCC BAA-244 / AMMD) OX=339670 GN=Bamb_3305 PE=3 SV=1 - [Q0BAG3_BURCM]	3840.23	72.15	1	48	48	147	905	98.6721	6.34131
Q0BIA0	L-aspartate-binding protein / L-glutamate-binding protein OS=Burkholderia ambifaria (strain ATCC BAA-244 / AMMD) OX=339670 GN=Bamb_0564 PE=4 SV=1 - [Q0BIA0_BURCM]	3806.33	68.69	1	19	19	134	297	32.5986	8.93896
Q0BDP3	Pyruvate dehydrogenase E1 component OS=Burkholderia ambifaria (strain ATCC BAA-244 / AMMD) OX=339670 GN=Bamb_2174 PE=4 SV=1 - [Q0BDP3_BURCM]	3585.68	60.24	1	43	43	131	898	100.557	5.8208
Q0BJ48	Elongation factor Tu OS=Burkholderia ambifaria (strain ATCC BAA-244 / AMMD) OX=339670 GN=tuf1 PE=3 SV=1 - [EFTU_BURCM]	3558.14	75	1	21	21	115	396	42.907	5.61768
Q0BAF2	Citrate synthase OS=Burkholderia ambifaria (strain ATCC BAA-244 / AMMD) OX=339670 GN=Bamb_3316 PE=3 SV=1 - [Q0BAF2_BURCM]	3424.73	73.67	1	26	26	143	433	48.4072	6.80029
Q0BC71	Succinate--CoA ligase [ADP-forming] subunit beta OS=Burkholderia ambifaria (strain ATCC BAA-244 / AMMD) OX=339670 GN=sucC PE=3 SV=1 - [SUCC_BURCM]	3319.01	70.62	1	23	23	104	388	41.2396	5.21143
Q0B6M7	5-methyltetrahydropteroyltriglutamate--homocysteine methyltransferase OS=Burkholderia ambifaria (strain ATCC BAA-244 / AMMD) OX=339670 GN=metE PE=3 SV=1 - [METE_BURCM]	3135.54	53.8	1	31	31	113	764	84.9026	5.63037
Q0B114	Uncharacterized protein OS=Burkholderia ambifaria (strain ATCC BAA-244 / AMMD) OX=339670 GN=Bamb_6616 PE=4 SV=1 - [Q0B114_BURCM]	3068.06	54.21	1	53	53	116	1448	158.9	5.74463
Q0B6G1	Succinate semialdehyde dehydrogenase OS=Burkholderia ambifaria (strain ATCC BAA-244 / AMMD) OX=339670 GN=Bamb_4712 PE=3 SV=1 - [Q0B6G1_BURCM]	3028.41	85.28	1	29	29	107	489	51.7017	6.46826
Q0BE32	Phosphoenolpyruvate synthase OS=Burkholderia ambifaria (strain ATCC BAA-244 / AMMD) OX=339670 GN=Bamb_2035 PE=3 SV=1 - [Q0BE32_BURCM]	2911.23	61.08	1	41	41	109	799	87.9611	5.35107
Q0BF71	Saccharopine dehydrogenase OS=Burkholderia ambifaria (strain ATCC BAA-244 / AMMD) OX=339670 GN=Bamb_1645 PE=4 SV=1 - [Q0BF71_BURCM]	2871.52	65.57	1	21	21	100	366	40.1265	6.15088
Q0BI48	Catalase-peroxidase 1 OS=Burkholderia ambifaria (strain ATCC BAA-244 / AMMD) OX=339670 GN=katG1 PE=3 SV=1 - [KATG1_BURCM]	2868.92	65.11	1	31	31	101	728	79.0837	5.87158
Q0B6G2	4-aminobutyrate aminotransferase apoenzyme OS=Burkholderia ambifaria (strain ATCC BAA-244 / AMMD) OX=339670 GN=Bamb_4711 PE=3 SV=1 - [Q0B6G2_BURCM]	2827.9	69.96	1	21	21	111	446	47.7038	7.26904
Q0BHQ5	GDP-mannose 4,6-dehydratase OS=Burkholderia ambifaria (strain ATCC BAA-244 / AMMD) OX=339670 GN=gmd PE=3 SV=1 - [Q0BHQ5_BURCM]	2815.82	65.61	2	18	18	85	346	38.919	6.20166
Q0BCJ6	Isocitrate dehydrogenase, NADP-dependent OS=Burkholderia ambifaria (strain ATCC BAA-244 / AMMD) OX=339670 GN=Bamb_2571 PE=4 SV=1 - [Q0BCJ6_BURCM]	2773.98	66.71	1	36	36	109	742	79.9472	6.17627
Q0BC72	Succinate--CoA ligase [ADP-forming] subunit alpha OS=Burkholderia ambifaria (strain ATCC BAA-244 / AMMD) OX=339670 GN=sucD PE=3 SV=1 - [Q0BC72_BURCM]	2645.91	59.73	1	12	12	80	293	30.804	6.69775
Q0BGJ6	Carbamoyl-phosphate synthase large chain OS=Burkholderia ambifaria (strain ATCC BAA-244 / AMMD) OX=339670 GN=carB PE=3 SV=1 - [Q0BGJ6_BURCM]	2554.52	56.83	1	48	48	114	1084	118.473	5.21143
Q0BEY9	Acetyl-CoA acetyltransferase OS=Burkholderia ambifaria (strain ATCC BAA-244 / AMMD) OX=339670 GN=Bamb_1728 PE=3 SV=1 - [Q0BEY9_BURCM]	2550.98	78.37	1	4	19	93	393	40.3479	7.48877
Q0BJK8	Amino acid/amide ABC transporter substrate-binding protein, HAAT family OS=Burkholderia ambifaria (strain ATCC BAA-244 / AMMD) OX=339670 GN=Bamb_0104 PE=4 SV=1 - [Q0BJK8_BURCM]	2521.23	66.49	1	17	17	89	379	40.1031	8.90967
Q0BC92	Phosphoglycerate kinase OS=Burkholderia ambifaria (strain ATCC BAA-244 / AMMD) OX=339670 GN=pgk PE=3 SV=1 - [Q0BC92_BURCM]	2407.28	69.85	1	20	20	79	398	41.2058	5.51611
Q0B1N7	60 kDa chaperonin 3 OS=Burkholderia ambifaria (strain ATCC BAA-244 / AMMD) OX=339670 GN=groL3 PE=3 SV=1 - [CH603_BURCM]	2403.46	74.63	1	26	30	90	540	57.0403	5.31299
Q0BFX3	Dihydrolipoyl dehydrogenase OS=Burkholderia ambifaria (strain ATCC BAA-244 / AMMD) OX=339670 GN=Bamb_1392 PE=3 SV=1 - [Q0BFX3_BURCM]	2374.65	63.24	1	23	23	84	476	50.4624	6.18896
Q0BCK8	Isoleucine--tRNA ligase OS=Burkholderia ambifaria (strain ATCC BAA-244 / AMMD) OX=339670 GN=ileS PE=3 SV=1 - [SYI_BURCM]	2343.63	50.37	1	31	31	77	945	105.788	6.46826
Q0B466	Aldehyde dehydrogenase OS=Burkholderia ambifaria (strain ATCC BAA-244 / AMMD) OX=339670 GN=Bamb_5510 PE=3 SV=1 - [Q0B466_BURCM]	2323.25	70.44	1	24	24	70	477	51.7487	5.64307
Q0BHP2	Phosphomannomutase OS=Burkholderia ambifaria (strain ATCC BAA-244 / AMMD) OX=339670 GN=Bamb_0772 PE=4 SV=1 - [Q0BHP2_BURCM]	2306.69	68.99	1	23	23	68	487	53.0923	5.61768
Q0B8U2	Phosphoenolpyruvate carboxykinase [GTP] OS=Burkholderia ambifaria (strain ATCC BAA-244 / AMMD) OX=339670 GN=pckG PE=3 SV=1 - [Q0B8U2_BURCM]	2257.9	73.11	1	30	30	79	621	68.3429	6.03662
Q0BIB5	Leucine--tRNA ligase OS=Burkholderia ambifaria (strain ATCC BAA-244 / AMMD) OX=339670 GN=leuS PE=3 SV=1 - [SYL_BURCM]	2243.15	51.97	1	33	33	73	864	95.8609	5.56689
Q0BJ55	50S ribosomal protein L7/L12 OS=Burkholderia ambifaria (strain ATCC BAA-244 / AMMD) OX=339670 GN=rplL PE=3 SV=1 - [RL7_BURCM]	2238.31	63.71	1	6	6	72	124	12.4977	4.93213
Q0BIC6	Transketolase OS=Burkholderia ambifaria (strain ATCC BAA-244 / AMMD) OX=339670 GN=Bamb_0538 PE=3 SV=1 - [Q0BIC6_BURCM]	2229.08	79.71	1	28	28	95	690	74.2555	6.12549
Q0BDC6	Polyribonucleotide nucleotidyltransferase OS=Burkholderia ambifaria (strain ATCC BAA-244 / AMMD) OX=339670 GN=pnp PE=3 SV=1 - [PNP_BURCM]	2224.15	54.2	1	30	30	81	714	76.9601	5.5542
Q0B2M2	Amino acid/amide ABC transporter substrate-binding protein, HAAT family OS=Burkholderia ambifaria (strain ATCC BAA-244 / AMMD) OX=339670 GN=Bamb_6057 PE=4 SV=1 - [Q0B2M2_BURCM]	2194.18	70.05	3	19	19	67	384	39.9156	8.73389
Q0BDG8	Aminotransferase OS=Burkholderia ambifaria (strain ATCC BAA-244 / AMMD) OX=339670 GN=Bamb_2249 PE=3 SV=1 - [Q0BDG8_BURCM]	2128.1	67.67	1	20	20	74	399	42.505	6.7124
Q0BDS3	Enolase OS=Burkholderia ambifaria (strain ATCC BAA-244 / AMMD) OX=339670 GN=eno PE=3 SV=1 - [ENO_BURCM]	2123.97	68.85	1	18	18	68	427	45.6861	4.88135
Q0BJ76	Malate dehydrogenase (Oxaloacetate-decarboxylating) (NADP(+))/Phosphate acetyltransferase OS=Burkholderia ambifaria (strain ATCC BAA-244 / AMMD) OX=339670 GN=Bamb_0237 PE=3 SV=1 - [Q0BJ76_BURCM]	2114.56	75	1	31	31	84	756	80.9761	6.1001
Q0BF34	Betaine-aldehyde dehydrogenase OS=Burkholderia ambifaria (strain ATCC BAA-244 / AMMD) OX=339670 GN=Bamb_1682 PE=3 SV=1 - [Q0BF34_BURCM]	2096.16	61.55	1	23	23	71	502	53.4975	7.32764
Q0BBU3	Acetyl-CoA acetyltransferase OS=Burkholderia ambifaria (strain ATCC BAA-244 / AMMD) OX=339670 GN=Bamb_2824 PE=3 SV=1 - [Q0BBU3_BURCM]	2049.65	78.37	1	3	18	81	393	40.1648	7.10791
Q0BJ49	Elongation factor G OS=Burkholderia ambifaria (strain ATCC BAA-244 / AMMD) OX=339670 GN=fusA PE=3 SV=1 - [Q0BJ49_BURCM]	2022.08	66.86	1	25	35	91	700	77.3552	5.5415
Q0BE45	GMP synthase [glutamine-hydrolyzing] OS=Burkholderia ambifaria (strain ATCC BAA-244 / AMMD) OX=339670 GN=guaA PE=3 SV=1 - [GUAA_BURCM]	2007.23	71.24	1	24	24	68	539	59.3124	6.29053
Q0BI80	Bifunctional purine biosynthesis protein PurH OS=Burkholderia ambifaria (strain ATCC BAA-244 / AMMD) OX=339670 GN=purH PE=3 SV=1 - [PUR9_BURCM]	1991.47	79.65	1	24	24	62	521	55.4863	5.92236
Q0B4W4	Aminotransferase, class I and II OS=Burkholderia ambifaria (strain ATCC BAA-244 / AMMD) OX=339670 GN=Bamb_5262 PE=4 SV=1 - [Q0B4W4_BURCM]	1926.68	78.95	1	20	20	61	399	43.0264	6.40479
Q0BBZ1	Aspartate--tRNA(Asp/Asn) ligase OS=Burkholderia ambifaria (strain ATCC BAA-244 / AMMD) OX=339670 GN=aspS PE=3 SV=1 - [SYDND_BURCM]	1906.52	59.67	1	27	27	79	600	67.6735	5.89697
Q0BCJ5	Isocitrate dehydrogenase [NADP] OS=Burkholderia ambifaria (strain ATCC BAA-244 / AMMD) OX=339670 GN=Bamb_2572 PE=4 SV=1 - [Q0BCJ5_BURCM]	1875.61	60.05	1	23	23	87	418	45.8897	5.80811
Q0BAY8	S-adenosylmethionine synthase OS=Burkholderia ambifaria (strain ATCC BAA-244 / AMMD) OX=339670 GN=metK PE=3 SV=1 - [METK_BURCM]	1874.44	70.38	1	19	19	69	395	42.6929	5.22412
Q0BGV3	Acetylornithine aminotransferase OS=Burkholderia ambifaria (strain ATCC BAA-244 / AMMD) OX=339670 GN=argD PE=3 SV=1 - [Q0BGV3_BURCM]	1867.51	78.29	1	23	23	75	410	43.8538	6.31592
Q0BHD6	Alanyl aminopeptidase, Metallo peptidase, MEROPS family M01 OS=Burkholderia ambifaria (strain ATCC BAA-244 / AMMD) OX=339670 GN=Bamb_0878 PE=4 SV=1 - [Q0BHD6_BURCM]	1863.21	54.18	1	34	34	77	897	99.384	5.60498
Q0BJ16	Delta-aminolevulinic acid dehydratase OS=Burkholderia ambifaria (strain ATCC BAA-244 / AMMD) OX=339670 GN=Bamb_0297 PE=3 SV=1 - [Q0BJ16_BURCM]	1828.17	55.72	1	14	14	67	332	37.0237	5.32568
Q0BC94	Fructose-1,6-bisphosphate aldolase OS=Burkholderia ambifaria (strain ATCC BAA-244 / AMMD) OX=339670 GN=Bamb_2673 PE=3 SV=1 - [Q0BC94_BURCM]	1814.09	75.99	1	18	18	71	354	38.4816	6.354
Q0BGS1	Extracellular solute-binding protein, family 1 OS=Burkholderia ambifaria (strain ATCC BAA-244 / AMMD) OX=339670 GN=Bamb_1093 PE=4 SV=1 - [Q0BGS1_BURCM]	1810.97	62.25	1	16	16	60	347	37.2347	8.90967
Q0BIH4	Proline--tRNA ligase OS=Burkholderia ambifaria (strain ATCC BAA-244 / AMMD) OX=339670 GN=proS PE=3 SV=1 - [SYP_BURCM]	1788.7	57.44	1	25	25	66	578	63.8616	5.36377
Q0BE43	Inosine-5'-monophosphate dehydrogenase OS=Burkholderia ambifaria (strain ATCC BAA-244 / AMMD) OX=339670 GN=guaB PE=3 SV=1 - [Q0BE43_BURCM]	1769.89	63.99	1	23	23	60	486	51.931	7.37158
Q0BH97	Uncharacterized protein OS=Burkholderia ambifaria (strain ATCC BAA-244 / AMMD) OX=339670 GN=Bamb_0917 PE=4 SV=1 - [Q0BH97_BURCM]	1755.98	66	1	14	14	59	200	21.3512	9.36377
Q0B4Y3	Uncharacterized protein OS=Burkholderia ambifaria (strain ATCC BAA-244 / AMMD) OX=339670 GN=Bamb_5242 PE=4 SV=1 - [Q0B4Y3_BURCM]	1753.33	61.7	1	14	14	64	342	38.2533	5.61768
Q0BIG1	Thiol peroxidase OS=Burkholderia ambifaria (strain ATCC BAA-244 / AMMD) OX=339670 GN=tpx PE=3 SV=1 - [Q0BIG1_BURCM]	1727.96	92.22	1	9	9	46	167	17.244	5.56689
Q0BAI3	6-phosphogluconate dehydrogenase, decarboxylating OS=Burkholderia ambifaria (strain ATCC BAA-244 / AMMD) OX=339670 GN=Bamb_3285 PE=3 SV=1 - [Q0BAI3_BURCM]	1717.59	68.94	1	22	22	57	470	50.7293	6.39209
Q0BJQ7	Histone family protein DNA-binding protein OS=Burkholderia ambifaria (strain ATCC BAA-244 / AMMD) OX=339670 GN=Bamb_0055 PE=3 SV=1 - [Q0BJQ7_BURCM]	1713.46	59.78	1	7	7	34	92	9.59925	10.1987
Q0BE16	Elongation factor Ts OS=Burkholderia ambifaria (strain ATCC BAA-244 / AMMD) OX=339670 GN=tsf PE=3 SV=1 - [EFTS_BURCM]	1704.51	77.82	1	18	18	60	293	31.0202	5.46533
Q0B4C4	Argininosuccinate synthase OS=Burkholderia ambifaria (strain ATCC BAA-244 / AMMD) OX=339670 GN=argG PE=3 SV=1 - [ASSY_BURCM]	1703.02	51.24	1	18	18	55	445	49.2071	5.59229
Q0BCU1	Argininosuccinate lyase OS=Burkholderia ambifaria (strain ATCC BAA-244 / AMMD) OX=339670 GN=argH PE=3 SV=1 - [Q0BCU1_BURCM]	1698.75	47.55	1	20	20	53	490	53.5996	6.34131
Q0BDI4	Fumarate hydratase class I OS=Burkholderia ambifaria (strain ATCC BAA-244 / AMMD) OX=339670 GN=Bamb_2233 PE=3 SV=1 - [Q0BDI4_BURCM]	1692.9	66.27	1	26	26	84	507	54.4	6.13818
Q0BDB6	Ketol-acid reductoisomerase (NADP(+)) OS=Burkholderia ambifaria (strain ATCC BAA-244 / AMMD) OX=339670 GN=ilvC PE=3 SV=1 - [ILVC_BURCM]	1620.02	72.49	1	17	17	69	338	36.3466	6.29053
Q0BIT1	Uncharacterized protein OS=Burkholderia ambifaria (strain ATCC BAA-244 / AMMD) OX=339670 GN=Bamb_0383 PE=4 SV=1 - [Q0BIT1_BURCM]	1586.85	88.02	1	13	13	73	167	18.4112	7.25439
Q0BC05	Chaperone SurA OS=Burkholderia ambifaria (strain ATCC BAA-244 / AMMD) OX=339670 GN=surA PE=3 SV=1 - [Q0BC05_BURCM]	1568.02	58.19	1	21	21	49	452	49.1676	8.646
Q0BCT8	Ornithine decarboxylase OS=Burkholderia ambifaria (strain ATCC BAA-244 / AMMD) OX=339670 GN=Bamb_2479 PE=4 SV=1 - [Q0BCT8_BURCM]	1564.09	49.93	1	27	27	62	759	85.483	5.36377
Q0BDN1	Glutamine synthetase OS=Burkholderia ambifaria (strain ATCC BAA-244 / AMMD) OX=339670 GN=Bamb_2186 PE=3 SV=1 - [Q0BDN1_BURCM]	1551.51	62.85	1	21	21	67	471	52.2027	5.45264
Q0BEF5	Trigger factor OS=Burkholderia ambifaria (strain ATCC BAA-244 / AMMD) OX=339670 GN=tig PE=3 SV=1 - [TIG_BURCM]	1544.53	46.65	1	19	19	55	448	49.8566	5.07178
Q0BFL2	Monosaccharide ABC transporter substrate-binding protein, CUT2 family OS=Burkholderia ambifaria (strain ATCC BAA-244 / AMMD) OX=339670 GN=Bamb_1503 PE=4 SV=1 - [Q0BFL2_BURCM]	1541.45	73.73	1	19	19	54	316	33.5448	9.37842
Q0BH13	3-oxoacyl-[acyl-carrier-protein] synthase 2 OS=Burkholderia ambifaria (strain ATCC BAA-244 / AMMD) OX=339670 GN=Bamb_1001 PE=3 SV=1 - [Q0BH13_BURCM]	1481.15	65.8	1	16	16	43	421	44.0531	6.1001
Q0B5T2	Malate synthase G OS=Burkholderia ambifaria (strain ATCC BAA-244 / AMMD) OX=339670 GN=glcB PE=3 SV=1 - [Q0B5T2_BURCM]	1467.05	65.06	1	28	28	63	724	78.392	6.3667
Q0BEW7	4-hydroxy-3-methylbut-2-en-1-yl diphosphate synthase (flavodoxin) OS=Burkholderia ambifaria (strain ATCC BAA-244 / AMMD) OX=339670 GN=ispG PE=3 SV=1 - [Q0BEW7_BURCM]	1460.45	65.75	1	19	19	40	438	46.9139	6.13818
Q0BEG2	Glucose-6-phosphate isomerase OS=Burkholderia ambifaria (strain ATCC BAA-244 / AMMD) OX=339670 GN=pgi PE=3 SV=1 - [Q0BEG2_BURCM]	1457.09	49.82	1	21	21	53	556	60.9974	6.90283
Q0BGU7	Amino acid ABC transporter substrate-binding protein, PAAT family OS=Burkholderia ambifaria (strain ATCC BAA-244 / AMMD) OX=339670 GN=Bamb_1067 PE=3 SV=1 - [Q0BGU7_BURCM]	1434.04	60.61	1	13	13	45	264	28.0227	8.93896
Q0BD56	3-carboxymuconate cyclase-like protein OS=Burkholderia ambifaria (strain ATCC BAA-244 / AMMD) OX=339670 GN=Bamb_2361 PE=4 SV=1 - [Q0BD56_BURCM]	1416.82	58.55	1	17	17	41	415	44.2504	8.88037
Q0BG83	Glutamine--tRNA ligase OS=Burkholderia ambifaria (strain ATCC BAA-244 / AMMD) OX=339670 GN=glnS PE=3 SV=1 - [Q0BG83_BURCM]	1404.93	51.85	1	24	24	51	569	64.9912	6.17627
Q0BAC4	Aspartate-semialdehyde dehydrogenase OS=Burkholderia ambifaria (strain ATCC BAA-244 / AMMD) OX=339670 GN=asd PE=3 SV=1 - [Q0BAC4_BURCM]	1395.61	68.9	1	16	16	51	373	40.2155	5.64307
Q0BBE7	Thiol:disulfide interchange protein OS=Burkholderia ambifaria (strain ATCC BAA-244 / AMMD) OX=339670 GN=Bamb_2970 PE=3 SV=1 - [Q0BBE7_BURCM]	1389.15	65.26	1	13	13	49	213	23.3532	8.98291
Q0BES5	Homoserine dehydrogenase OS=Burkholderia ambifaria (strain ATCC BAA-244 / AMMD) OX=339670 GN=Bamb_1792 PE=3 SV=1 - [Q0BES5_BURCM]	1367.81	52.04	1	15	15	35	442	47.073	5.63037
Q0BH91	30S ribosomal protein S1 OS=Burkholderia ambifaria (strain ATCC BAA-244 / AMMD) OX=339670 GN=Bamb_0923 PE=3 SV=1 - [Q0BH91_BURCM]	1354.3	34.2	1	16	16	51	576	63.0007	5.24951
Q0BJL5	ATP synthase subunit beta OS=Burkholderia ambifaria (strain ATCC BAA-244 / AMMD) OX=339670 GN=atpD PE=3 SV=1 - [ATPB_BURCM]	1336.43	75.22	1	21	21	42	464	50.5381	5.41455
Q0BHQ9	Mannose-6-phosphate isomerase, type 2 / mannose-1-phosphate guanylyltransferase (GDP) OS=Burkholderia ambifaria (strain ATCC BAA-244 / AMMD) OX=339670 GN=Bamb_0755 PE=3 SV=1 - [Q0BHQ9_BURCM]	1335.82	69.44	1	22	22	48	481	52.3544	5.90967
Q0BJW0	Beta sliding clamp OS=Burkholderia ambifaria (strain ATCC BAA-244 / AMMD) OX=339670 GN=Bamb_0002 PE=3 SV=1 - [Q0BJW0_BURCM]	1330.45	69.84	1	21	21	48	368	40.7015	5.51611
Q0BDN9	Oligopeptidase A, Metallo peptidase, MEROPS family M03A OS=Burkholderia ambifaria (strain ATCC BAA-244 / AMMD) OX=339670 GN=Bamb_2178 PE=3 SV=1 - [Q0BDN9_BURCM]	1325.04	54.1	1	23	23	56	695	77.0174	5.33838
Q0BIA3	Adenylosuccinate lyase OS=Burkholderia ambifaria (strain ATCC BAA-244 / AMMD) OX=339670 GN=Bamb_0561 PE=3 SV=1 - [Q0BIA3_BURCM]	1323.02	59.74	1	19	19	53	462	51.7757	6.44287
Q0BES6	L-threonine synthase OS=Burkholderia ambifaria (strain ATCC BAA-244 / AMMD) OX=339670 GN=Bamb_1791 PE=4 SV=1 - [Q0BES6_BURCM]	1317.11	44.93	1	16	16	35	483	52.8265	5.74463
Q0BIZ9	Glycerol 3-phosphate-binding protein OS=Burkholderia ambifaria (strain ATCC BAA-244 / AMMD) OX=339670 GN=Bamb_0314 PE=4 SV=1 - [Q0BIZ9_BURCM]	1314.11	59.46	1	17	17	39	444	48.1834	9.18799
Q0BBQ5	Ribose-phosphate pyrophosphokinase OS=Burkholderia ambifaria (strain ATCC BAA-244 / AMMD) OX=339670 GN=prs PE=3 SV=1 - [Q0BBQ5_BURCM]	1313.92	72.81	1	14	14	44	320	34.4859	6.04932
Q0BH14	Acyl carrier protein OS=Burkholderia ambifaria (strain ATCC BAA-244 / AMMD) OX=339670 GN=acpP PE=3 SV=1 - [Q0BH14_BURCM]	1310.23	43.04	1	4	4	34	79	8.70632	4.18311
Q0B6A8	Amino acid ABC transporter substrate-binding protein, PAAT family OS=Burkholderia ambifaria (strain ATCC BAA-244 / AMMD) OX=339670 GN=Bamb_4765 PE=4 SV=1 - [Q0B6A8_BURCM]	1303.44	64.23	1	10	16	52	260	28.2015	8.90967
Q0BDP5	Dihydrolipoyl dehydrogenase OS=Burkholderia ambifaria (strain ATCC BAA-244 / AMMD) OX=339670 GN=Bamb_2172 PE=3 SV=1 - [Q0BDP5_BURCM]	1299.92	44.73	2	16	16	42	588	61.4918	5.42725
Q0BCV5	Inorganic pyrophosphatase OS=Burkholderia ambifaria (strain ATCC BAA-244 / AMMD) OX=339670 GN=ppa PE=3 SV=1 - [Q0BCV5_BURCM]	1298.63	75	1	13	13	54	204	22.6676	7.1665
Q0BEZ0	3-oxoacyl-[acyl-carrier-protein] reductase OS=Burkholderia ambifaria (strain ATCC BAA-244 / AMMD) OX=339670 GN=Bamb_1727 PE=3 SV=1 - [Q0BEZ0_BURCM]	1297.15	69.92	1	12	12	43	246	26.2854	7.37158
Q0BJ32	30S ribosomal protein S8 OS=Burkholderia ambifaria (strain ATCC BAA-244 / AMMD) OX=339670 GN=rpsH PE=3 SV=1 - [RS8_BURCM]	1294.47	58.02	1	9	9	40	131	14.1895	9.56885
Q0BDD6	NADH-quinone oxidoreductase OS=Burkholderia ambifaria (strain ATCC BAA-244 / AMMD) OX=339670 GN=Bamb_2281 PE=3 SV=1 - [Q0BDD6_BURCM]	1290.77	44.07	1	24	24	49	776	82.7066	6.69775
Q0BG06	Threonine--tRNA ligase OS=Burkholderia ambifaria (strain ATCC BAA-244 / AMMD) OX=339670 GN=thrS PE=3 SV=1 - [SYT_BURCM]	1287.51	44.09	1	22	22	43	635	72.2606	6.40479
Q0BHX0	Acyl-CoA dehydrogenase domain protein OS=Burkholderia ambifaria (strain ATCC BAA-244 / AMMD) OX=339670 GN=Bamb_0694 PE=3 SV=1 - [Q0BHX0_BURCM]	1275.18	64.3	1	17	17	56	395	43.2521	6.15088
Q0BAV4	Glutamyl-tRNA(Gln) amidotransferase subunit A OS=Burkholderia ambifaria (strain ATCC BAA-244 / AMMD) OX=339670 GN=gatA PE=3 SV=1 - [GATA_BURCM]	1235.12	57.46	1	19	19	47	496	52.4103	6.27783
Q0B8Y9	2,5-dioxopentanoate dehydrogenase (NAD+) OS=Burkholderia ambifaria (strain ATCC BAA-244 / AMMD) OX=339670 GN=Bamb_3830 PE=4 SV=1 - [Q0B8Y9_BURCM]	1214.86	65.7	1	21	21	50	481	50.8085	6.66846
Q0BI34	Phospho-2-dehydro-3-deoxyheptonate aldolase OS=Burkholderia ambifaria (strain ATCC BAA-244 / AMMD) OX=339670 GN=Bamb_0630 PE=3 SV=1 - [Q0BI34_BURCM]	1210.95	56.86	1	15	16	42	357	38.8288	6.68311
Q0BAF5	Succinate dehydrogenase flavoprotein subunit OS=Burkholderia ambifaria (strain ATCC BAA-244 / AMMD) OX=339670 GN=Bamb_3313 PE=3 SV=1 - [Q0BAF5_BURCM]	1206.96	34.52	1	17	17	45	591	64.5556	6.7124
Q0BEZ8	Cystathionine beta-lyase OS=Burkholderia ambifaria (strain ATCC BAA-244 / AMMD) OX=339670 GN=Bamb_1719 PE=3 SV=1 - [Q0BEZ8_BURCM]	1205.33	71.83	1	18	18	45	394	42.7488	6.0874
Q0BDV2	Peptidyl-prolyl cis-trans isomerase OS=Burkholderia ambifaria (strain ATCC BAA-244 / AMMD) OX=339670 GN=Bamb_2115 PE=3 SV=1 - [Q0BDV2_BURCM]	1205.28	73.82	1	13	13	49	191	20.3527	9.42236
Q0BC95	Phosphoribosylaminoimidazole-succinocarboxamide synthase OS=Burkholderia ambifaria (strain ATCC BAA-244 / AMMD) OX=339670 GN=purC PE=3 SV=1 - [Q0BC95_BURCM]	1203.97	84.8	1	22	22	54	296	32.6618	5.16064
Q0BDP6	Phasin family protein OS=Burkholderia ambifaria (strain ATCC BAA-244 / AMMD) OX=339670 GN=Bamb_2171 PE=4 SV=1 - [Q0BDP6_BURCM]	1203.32	80.32	1	13	13	39	188	19.8355	6.17627
Q0B9S9	Acetyl-CoA hydrolase OS=Burkholderia ambifaria (strain ATCC BAA-244 / AMMD) OX=339670 GN=Bamb_3540 PE=4 SV=1 - [Q0B9S9_BURCM]	1200.5	46.03	1	17	17	51	504	54.4728	6.49365
Q0BH76	Electron transfer flavoprotein beta-subunit OS=Burkholderia ambifaria (strain ATCC BAA-244 / AMMD) OX=339670 GN=Bamb_0938 PE=4 SV=1 - [Q0BH76_BURCM]	1198.23	67.47	1	11	11	37	249	26.5517	8.66064
Q0B8U9	Alcohol dehydrogenase GroES domain protein OS=Burkholderia ambifaria (strain ATCC BAA-244 / AMMD) OX=339670 GN=Bamb_3870 PE=3 SV=1 - [Q0B8U9_BURCM]	1192.47	65.98	1	13	13	45	338	35.6664	6.56592
Q0BCE1	Kynureninase OS=Burkholderia ambifaria (strain ATCC BAA-244 / AMMD) OX=339670 GN=kynU PE=3 SV=1 - [Q0BCE1_BURCM]	1181.47	48.68	1	14	14	37	417	45.3921	6.37939
Q0BG79	Alanine--tRNA ligase OS=Burkholderia ambifaria (strain ATCC BAA-244 / AMMD) OX=339670 GN=alaS PE=3 SV=1 - [SYA_BURCM]	1159.55	44.85	1	23	23	48	874	95.4967	6.06201
Q0BID2	Malate dehydrogenase (Oxaloacetate-decarboxylating) (NADP(+))/Phosphate acetyltransferase OS=Burkholderia ambifaria (strain ATCC BAA-244 / AMMD) OX=339670 GN=Bamb_0532 PE=4 SV=1 - [Q0BID2_BURCM]	1150.03	49.35	1	22	23	56	766	83.0399	6.06201
Q0B3R0	Linocin_M18 bacteriocin protein OS=Burkholderia ambifaria (strain ATCC BAA-244 / AMMD) OX=339670 GN=Bamb_5666 PE=4 SV=1 - [Q0B3R0_BURCM]	1136.72	59.78	1	10	10	37	271	28.9699	5.10986
Q0BDV8	Aspartokinase OS=Burkholderia ambifaria (strain ATCC BAA-244 / AMMD) OX=339670 GN=Bamb_2109 PE=3 SV=1 - [Q0BDV8_BURCM]	1125.21	56.12	1	17	17	43	417	45.0962	5.36377
Q0B7H9	Peptidase M20 OS=Burkholderia ambifaria (strain ATCC BAA-244 / AMMD) OX=339670 GN=Bamb_4342 PE=4 SV=1 - [Q0B7H9_BURCM]	1120.61	66.32	1	20	20	49	484	52.2417	5.24951
Q0BCJ1	Elongation factor G OS=Burkholderia ambifaria (strain ATCC BAA-244 / AMMD) OX=339670 GN=fusA PE=3 SV=1 - [Q0BCJ1_BURCM]	1114.59	37.41	1	8	19	44	703	77.5913	5.46533
Q0BIG7	Ribonucleoside-diphosphate reductase OS=Burkholderia ambifaria (strain ATCC BAA-244 / AMMD) OX=339670 GN=Bamb_0497 PE=3 SV=1 - [Q0BIG7_BURCM]	1112.81	29.53	1	20	20	36	999	109.558	6.22705
Q0BER7	NAD-dependent epimerase/dehydratase OS=Burkholderia ambifaria (strain ATCC BAA-244 / AMMD) OX=339670 GN=Bamb_1800 PE=4 SV=1 - [Q0BER7_BURCM]	1109.71	67.71	1	17	17	42	350	39.4019	6.30322
Q0B467	Thiamine pyrophosphate enzyme domain protein TPP-binding protein OS=Burkholderia ambifaria (strain ATCC BAA-244 / AMMD) OX=339670 GN=Bamb_5509 PE=3 SV=1 - [Q0B467_BURCM]	1099.31	51.1	1	17	17	43	546	60.868	6.45557
Q0BEP0	Ankyrin OS=Burkholderia ambifaria (strain ATCC BAA-244 / AMMD) OX=339670 GN=Bamb_1827 PE=4 SV=1 - [Q0BEP0_BURCM]	1092.68	68.64	1	12	12	39	236	24.6491	7.06396
Q0BD43	Transaldolase OS=Burkholderia ambifaria (strain ATCC BAA-244 / AMMD) OX=339670 GN=tal PE=3 SV=1 - [TAL_BURCM]	1091.49	63.09	1	18	18	44	317	35.2963	5.32568
Q0BBW0	Peptidase M48, Ste24p OS=Burkholderia ambifaria (strain ATCC BAA-244 / AMMD) OX=339670 GN=Bamb_2807 PE=3 SV=1 - [Q0BBW0_BURCM]	1074.4	64.43	1	11	11	41	253	26.63	8.77783
Q0BBM7	Lipoprotein OS=Burkholderia ambifaria (strain ATCC BAA-244 / AMMD) OX=339670 GN=Bamb_2890 PE=3 SV=1 - [Q0BBM7_BURCM]	1070.58	54.61	1	11	11	30	271	29.2248	9.51025
Q0BGJ5	Transcription elongation factor GreA OS=Burkholderia ambifaria (strain ATCC BAA-244 / AMMD) OX=339670 GN=greA PE=3 SV=1 - [Q0BGJ5_BURCM]	1069.69	82.28	1	9	9	25	158	16.9327	4.52588
Q0BFR1	Amino acid ABC transporter substrate-binding protein, PAAT family OS=Burkholderia ambifaria (strain ATCC BAA-244 / AMMD) OX=339670 GN=Bamb_1454 PE=3 SV=1 - [Q0BFR1_BURCM]	1066.86	64.77	1	13	13	45	264	28.4151	9.45166
Q0BHJ7	6,7-dimethyl-8-ribityllumazine synthase OS=Burkholderia ambifaria (strain ATCC BAA-244 / AMMD) OX=339670 GN=ribH PE=3 SV=1 - [RISB_BURCM]	1053.15	94.15	1	8	8	27	171	18.434	4.08154
Q0B3F3	Acyl-CoA dehydrogenase domain protein OS=Burkholderia ambifaria (strain ATCC BAA-244 / AMMD) OX=339670 GN=Bamb_5773 PE=3 SV=1 - [Q0B3F3_BURCM]	1052.22	44.63	1	17	17	38	596	63.4882	5.78271
Q0BE05	2,3,4,5-tetrahydropyridine-2,6-dicarboxylate N-succinyltransferase OS=Burkholderia ambifaria (strain ATCC BAA-244 / AMMD) OX=339670 GN=dapD PE=3 SV=1 - [DAPD_BURCM]	1046.85	73.82	1	15	15	38	275	29.4611	5.93506
Q0BDD5	NADH-quinone oxidoreductase subunit F OS=Burkholderia ambifaria (strain ATCC BAA-244 / AMMD) OX=339670 GN=Bamb_2282 PE=3 SV=1 - [Q0BDD5_BURCM]	1046.26	47.48	1	13	13	42	436	47.7847	6.58057
Q0BG67	Short-chain dehydrogenase/reductase SDR OS=Burkholderia ambifaria (strain ATCC BAA-244 / AMMD) OX=339670 GN=Bamb_1298 PE=4 SV=1 - [Q0BG67_BURCM]	1037.95	83.87	1	12	13	34	248	25.1442	5.60498
Q0BAY0	RNA polymerase-binding transcription factor DksA OS=Burkholderia ambifaria (strain ATCC BAA-244 / AMMD) OX=339670 GN=dksA PE=3 SV=1 - [Q0BAY0_BURCM]	1033.36	71.01	1	11	11	31	138	15.9443	5.30029
Q0BH48	Fumarate hydratase class II OS=Burkholderia ambifaria (strain ATCC BAA-244 / AMMD) OX=339670 GN=fumC PE=3 SV=1 - [Q0BH48_BURCM]	1022.28	51.94	1	14	14	35	464	49.6836	6.43018
Q0BED9	Alkyl hydroperoxide reductase/ Thiol specific antioxidant/ Mal allergen OS=Burkholderia ambifaria (strain ATCC BAA-244 / AMMD) OX=339670 GN=Bamb_1928 PE=4 SV=1 - [Q0BED9_BURCM]	1010.39	60.99	1	10	10	50	182	20.2943	5.17334
Q0BCP3	Sulfite reductase (NADPH) beta subunit OS=Burkholderia ambifaria (strain ATCC BAA-244 / AMMD) OX=339670 GN=Bamb_2524 PE=3 SV=1 - [Q0BCP3_BURCM]	1009.92	49.37	1	19	19	44	559	62.7231	6.63916
Q0B6N3	Kumamolisin, Serine peptidase, MEROPS family S53 OS=Burkholderia ambifaria (strain ATCC BAA-244 / AMMD) OX=339670 GN=Bamb_4640 PE=4 SV=1 - [Q0B6N3_BURCM]	1009.29	53.31	1	17	17	44	529	54.7447	5.88428
Q0BDR2	Lysine--tRNA ligase OS=Burkholderia ambifaria (strain ATCC BAA-244 / AMMD) OX=339670 GN=lysS PE=3 SV=1 - [SYK_BURCM]	987.83	43.7	1	15	15	37	508	57.483	5.40186
Q0BDY7	Isocitrate lyase OS=Burkholderia ambifaria (strain ATCC BAA-244 / AMMD) OX=339670 GN=Bamb_2080 PE=4 SV=1 - [Q0BDY7_BURCM]	984.89	61.61	1	15	15	35	435	47.6939	6.16357
Q0BDK8	Urocanate hydratase OS=Burkholderia ambifaria (strain ATCC BAA-244 / AMMD) OX=339670 GN=hutU PE=3 SV=1 - [Q0BDK8_BURCM]	977.59	44.66	1	18	18	39	562	61.711	6.45557
Q0BIL7	Beta-ketoadipyl CoA thiolase OS=Burkholderia ambifaria (strain ATCC BAA-244 / AMMD) OX=339670 GN=Bamb_0447 PE=3 SV=1 - [Q0BIL7_BURCM]	977.32	68.75	1	13	19	36	400	41.8345	6.78564
Q0BIX0	Histidinol dehydrogenase OS=Burkholderia ambifaria (strain ATCC BAA-244 / AMMD) OX=339670 GN=hisD PE=3 SV=1 - [Q0BIX0_BURCM]	972.92	59.13	1	16	16	30	438	46.3538	5.16064
Q0BDV1	Peptidyl-prolyl cis-trans isomerase OS=Burkholderia ambifaria (strain ATCC BAA-244 / AMMD) OX=339670 GN=Bamb_2116 PE=3 SV=1 - [Q0BDV1_BURCM]	956.85	92.64	1	12	12	41	163	17.7649	6.18896
Q0BAV5	Aspartyl/glutamyl-tRNA(Asn/Gln) amidotransferase subunit B OS=Burkholderia ambifaria (strain ATCC BAA-244 / AMMD) OX=339670 GN=gatB PE=3 SV=1 - [GATB_BURCM]	956.37	57.64	1	19	19	37	491	53.4315	5.30029
Q0BGI8	Phosphate-binding protein PstS OS=Burkholderia ambifaria (strain ATCC BAA-244 / AMMD) OX=339670 GN=Bamb_1177 PE=3 SV=1 - [Q0BGI8_BURCM]	955.98	70.09	1	17	17	33	341	36.0247	8.90967
Q0BEM7	Uncharacterized protein OS=Burkholderia ambifaria (strain ATCC BAA-244 / AMMD) OX=339670 GN=Bamb_1840 PE=4 SV=1 - [Q0BEM7_BURCM]	952.23	39.33	1	14	14	33	506	57.154	6.49365
Q0BHT2	10 kDa chaperonin OS=Burkholderia ambifaria (strain ATCC BAA-244 / AMMD) OX=339670 GN=groS PE=3 SV=1 - [Q0BHT2_BURCM]	939.83	75.26	1	6	7	42	97	10.4836	6.11279
Q0BH99	OmpA/MotB domain protein OS=Burkholderia ambifaria (strain ATCC BAA-244 / AMMD) OX=339670 GN=Bamb_0915 PE=3 SV=1 - [Q0BH99_BURCM]	939.15	32.43	1	8	8	37	222	23.9523	9.37842
Q0BAB2	O-succinylhomoserine sulfhydrylase OS=Burkholderia ambifaria (strain ATCC BAA-244 / AMMD) OX=339670 GN=metZ PE=3 SV=1 - [Q0BAB2_BURCM]	938.75	53.9	1	15	15	38	410	44.3565	6.3667
Q0BHY7	Tol-Pal system protein TolB OS=Burkholderia ambifaria (strain ATCC BAA-244 / AMMD) OX=339670 GN=tolB PE=3 SV=1 - [TOLB_BURCM]	935.93	52.2	1	14	14	28	431	45.7213	9.61279
Q0BDK6	Histidine ammonia-lyase OS=Burkholderia ambifaria (strain ATCC BAA-244 / AMMD) OX=339670 GN=hutH PE=3 SV=1 - [HUTH_BURCM]	931.63	46.75	1	16	16	37	507	53.2759	6.26514
Q0BE18	Ribosome-recycling factor OS=Burkholderia ambifaria (strain ATCC BAA-244 / AMMD) OX=339670 GN=frr PE=3 SV=1 - [RRF_BURCM]	925.82	41.4	1	6	6	29	186	20.786	8.27979
Q0B9T6	2-aminoethylphosphonate--pyruvate transaminase OS=Burkholderia ambifaria (strain ATCC BAA-244 / AMMD) OX=339670 GN=phnW PE=3 SV=1 - [Q0B9T6_BURCM]	925.13	66.95	1	16	16	39	354	38.1117	6.75635
Q0BH83	Cysteine synthase OS=Burkholderia ambifaria (strain ATCC BAA-244 / AMMD) OX=339670 GN=Bamb_0931 PE=3 SV=1 - [Q0BH83_BURCM]	924.14	75	1	15	15	37	300	32.4306	5.8335
Q0B5Q2	2-amino-3-ketobutyrate coenzyme A ligase OS=Burkholderia ambifaria (strain ATCC BAA-244 / AMMD) OX=339670 GN=kbl PE=3 SV=1 - [Q0B5Q2_BURCM]	919.26	48.12	1	14	14	32	399	42.5109	6.55127
Q0BJ80	N-acetyl-gamma-glutamyl-phosphate reductase OS=Burkholderia ambifaria (strain ATCC BAA-244 / AMMD) OX=339670 GN=argC PE=3 SV=1 - [Q0BJ80_BURCM]	899.53	57.59	1	12	12	32	316	34.1374	6.32861
Q0B3L1	2-keto-4-pentenoate hydratase-like protein OS=Burkholderia ambifaria (strain ATCC BAA-244 / AMMD) OX=339670 GN=Bamb_5715 PE=4 SV=1 - [Q0B3L1_BURCM]	897.89	53.36	1	9	9	31	253	26.7741	5.21143
Q0BDP0	Bifunctional protein FolD OS=Burkholderia ambifaria (strain ATCC BAA-244 / AMMD) OX=339670 GN=folD PE=3 SV=1 - [FOLD_BURCM]	897.43	59.3	1	10	10	33	285	29.9056	7.04932
Q0BBH5	Branched chain amino acid: 2-keto-4-methylthiobutyrate aminotransferase OS=Burkholderia ambifaria (strain ATCC BAA-244 / AMMD) OX=339670 GN=Bamb_2942 PE=4 SV=1 - [Q0BBH5_BURCM]	886.97	58.12	1	12	12	29	308	34.0757	5.71924
Q0BB27	Extracellular solute-binding protein, family 5 OS=Burkholderia ambifaria (strain ATCC BAA-244 / AMMD) OX=339670 GN=Bamb_3090 PE=4 SV=1 - [Q0BB27_BURCM]	882.19	53.32	1	19	19	39	542	60.2515	8.66064
Q0BEX8	Adenylosuccinate synthetase OS=Burkholderia ambifaria (strain ATCC BAA-244 / AMMD) OX=339670 GN=purA PE=3 SV=1 - [Q0BEX8_BURCM]	881.26	53.79	1	19	19	40	448	48.1008	6.46826
Q0B712	NAD/NADP-dependent betaine aldehyde dehydrogenase OS=Burkholderia ambifaria (strain ATCC BAA-244 / AMMD) OX=339670 GN=betB PE=3 SV=1 - [BETB_BURCM]	880.95	61.35	1	19	19	37	489	52.2938	5.68115
Q0B103	TrbJ protein of DNA transfer system OS=Burkholderia ambifaria (strain ATCC BAA-244 / AMMD) OX=339670 GN=Bamb_6627 PE=4 SV=1 - [Q0B103_BURCM]	878.47	49.21	1	9	9	24	254	27.4259	8.90967
Q0BI57	YceI family protein OS=Burkholderia ambifaria (strain ATCC BAA-244 / AMMD) OX=339670 GN=Bamb_0607 PE=3 SV=1 - [Q0BI57_BURCM]	874.45	54.36	1	8	8	34	195	21.1918	8.00146
Q0BC89	Branched-chain-amino-acid aminotransferase OS=Burkholderia ambifaria (strain ATCC BAA-244 / AMMD) OX=339670 GN=ilvE PE=3 SV=1 - [Q0BC89_BURCM]	870.02	56.35	1	13	13	30	307	33.9804	6.45557
Q0BDT5	4-hydroxy-tetrahydrodipicolinate synthase OS=Burkholderia ambifaria (strain ATCC BAA-244 / AMMD) OX=339670 GN=dapA PE=3 SV=1 - [Q0BDT5_BURCM]	866.98	49.5	1	10	10	26	301	31.8427	6.80029
Q0BDS1	CTP synthase OS=Burkholderia ambifaria (strain ATCC BAA-244 / AMMD) OX=339670 GN=pyrG PE=3 SV=1 - [PYRG_BURCM]	864.71	41.3	1	14	14	32	552	61.2714	6.01123
Q0BH75	Electron transfer flavoprotein, alpha subunit OS=Burkholderia ambifaria (strain ATCC BAA-244 / AMMD) OX=339670 GN=Bamb_0939 PE=4 SV=1 - [Q0BH75_BURCM]	861.77	77.81	2	14	14	40	311	31.6347	5.07178
Q0BCH1	Adenylate kinase OS=Burkholderia ambifaria (strain ATCC BAA-244 / AMMD) OX=339670 GN=adk PE=3 SV=1 - [KAD_BURCM]	857.59	55.45	1	11	11	30	220	24.1416	6.62451
Q0BIX7	Toluene tolerance family protein OS=Burkholderia ambifaria (strain ATCC BAA-244 / AMMD) OX=339670 GN=Bamb_0336 PE=4 SV=1 - [Q0BIX7_BURCM]	853.79	51.43	1	9	9	28	210	23.7585	9.49561
Q0BF41	Putrescine-binding periplasmic protein OS=Burkholderia ambifaria (strain ATCC BAA-244 / AMMD) OX=339670 GN=Bamb_1675 PE=3 SV=1 - [Q0BF41_BURCM]	852.31	58.79	1	14	14	41	364	40.0608	8.88037
Q0B960	Aminotransferase OS=Burkholderia ambifaria (strain ATCC BAA-244 / AMMD) OX=339670 GN=Bamb_3759 PE=3 SV=1 - [Q0B960_BURCM]	847.54	68	1	18	18	36	400	43.5432	6.37939
Q0BCN0	Oxidoreductase FAD/NAD(P)-binding domain protein OS=Burkholderia ambifaria (strain ATCC BAA-244 / AMMD) OX=339670 GN=Bamb_2537 PE=4 SV=1 - [Q0BCN0_BURCM]	844.19	51.31	1	11	11	27	343	37.9251	6.40479
Q0BBS8	UvrABC system protein A OS=Burkholderia ambifaria (strain ATCC BAA-244 / AMMD) OX=339670 GN=uvrA PE=3 SV=1 - [Q0BBS8_BURCM]	843.45	39.54	1	23	23	43	961	106.324	6.62451
Q0BGV0	N-succinylglutamate 5-semialdehyde dehydrogenase OS=Burkholderia ambifaria (strain ATCC BAA-244 / AMMD) OX=339670 GN=astD PE=3 SV=1 - [ASTD_BURCM]	840.67	45.79	1	12	12	31	487	51.8244	6.25244
Q0BHY1	Serine hydroxymethyltransferase OS=Burkholderia ambifaria (strain ATCC BAA-244 / AMMD) OX=339670 GN=glyA PE=3 SV=1 - [Q0BHY1_BURCM]	839	48.03	2	10	10	33	431	46.6129	6.75635
Q0BHI0	Thioredoxin reductase OS=Burkholderia ambifaria (strain ATCC BAA-244 / AMMD) OX=339670 GN=Bamb_0834 PE=3 SV=1 - [Q0BHI0_BURCM]	836.76	61.85	1	13	13	39	346	37.2129	6.60986
Q0BJC2	Carboxymethylenebutenolidase OS=Burkholderia ambifaria (strain ATCC BAA-244 / AMMD) OX=339670 GN=Bamb_0190 PE=4 SV=1 - [Q0BJC2_BURCM]	836.3	58.7	1	8	8	23	230	24.4065	6.29053
Q0B5P2	3-hydroxybutyrate dehydrogenase OS=Burkholderia ambifaria (strain ATCC BAA-244 / AMMD) OX=339670 GN=Bamb_4982 PE=3 SV=1 - [Q0B5P2_BURCM]	834.15	51.72	1	2	11	34	261	27.3372	6.53662
Q0BJH9	Aminomethyltransferase OS=Burkholderia ambifaria (strain ATCC BAA-244 / AMMD) OX=339670 GN=gcvT PE=3 SV=1 - [Q0BJH9_BURCM]	830.59	49.87	1	11	11	31	377	40.6557	6.53662
Q0BFX5	2-oxoglutarate dehydrogenase E1 component OS=Burkholderia ambifaria (strain ATCC BAA-244 / AMMD) OX=339670 GN=Bamb_1390 PE=4 SV=1 - [Q0BFX5_BURCM]	830.05	31.03	1	20	20	40	954	106.691	6.58057
Q0BCH6	Superoxide dismutase OS=Burkholderia ambifaria (strain ATCC BAA-244 / AMMD) OX=339670 GN=Bamb_2591 PE=3 SV=1 - [Q0BCH6_BURCM]	828.14	79.69	1	10	10	30	192	21.1015	5.99854
Q0BIM5	Anthranilate synthase component 1 OS=Burkholderia ambifaria (strain ATCC BAA-244 / AMMD) OX=339670 GN=trpE PE=3 SV=1 - [Q0BIM5_BURCM]	827.62	37.83	1	16	16	34	497	55.2057	5.64307
Q0BH16	Malonyl CoA-acyl carrier protein transacylase OS=Burkholderia ambifaria (strain ATCC BAA-244 / AMMD) OX=339670 GN=Bamb_0998 PE=3 SV=1 - [Q0BH16_BURCM]	827.11	68.06	1	12	12	31	310	31.7306	5.65576
Q0BBE1	Carbonate dehydratase OS=Burkholderia ambifaria (strain ATCC BAA-244 / AMMD) OX=339670 GN=Bamb_2976 PE=4 SV=1 - [Q0BBE1_BURCM]	824.22	59.77	1	11	11	31	256	28.2511	6.25244
Q0BET2	Chaperone protein ClpB OS=Burkholderia ambifaria (strain ATCC BAA-244 / AMMD) OX=339670 GN=clpB PE=3 SV=1 - [Q0BET2_BURCM]	822.85	30.64	2	18	18	31	865	95.9275	5.74463
Q0BBJ9	Glutathione synthetase OS=Burkholderia ambifaria (strain ATCC BAA-244 / AMMD) OX=339670 GN=gshB PE=3 SV=1 - [Q0BBJ9_BURCM]	821.9	42.45	1	9	9	25	318	34.7127	5.93506
Q0BCG4	UPF0234 protein Bamb_2603 OS=Burkholderia ambifaria (strain ATCC BAA-244 / AMMD) OX=339670 GN=Bamb_2603 PE=3 SV=1 - [Y2603_BURCM]	821.2	45.96	1	10	10	31	161	18.1357	9.20264
Q0BH35	D-isomer specific 2-hydroxyacid dehydrogenase, NAD-binding protein OS=Burkholderia ambifaria (strain ATCC BAA-244 / AMMD) OX=339670 GN=Bamb_0979 PE=3 SV=1 - [Q0BH35_BURCM]	818.17	49.85	1	12	12	29	329	34.9791	6.3667
Q0BEY3	Uncharacterized protein OS=Burkholderia ambifaria (strain ATCC BAA-244 / AMMD) OX=339670 GN=Bamb_1734 PE=4 SV=1 - [Q0BEY3_BURCM]	798.88	76.06	1	6	6	27	71	8.35346	6.94678
Q0BBQ4	50S ribosomal protein L25 OS=Burkholderia ambifaria (strain ATCC BAA-244 / AMMD) OX=339670 GN=rplY PE=3 SV=1 - [RL25_BURCM]	798.09	76.24	1	9	9	30	202	21.6105	6.52197
Q0BAC5	3-isopropylmalate dehydrogenase OS=Burkholderia ambifaria (strain ATCC BAA-244 / AMMD) OX=339670 GN=leuB PE=3 SV=1 - [Q0BAC5_BURCM]	789.5	47.61	1	12	12	33	355	38.1837	5.30029
Q0BHP6	UDP-galactose 4-epimerase OS=Burkholderia ambifaria (strain ATCC BAA-244 / AMMD) OX=339670 GN=Bamb_0768 PE=4 SV=1 - [Q0BHP6_BURCM]	789.23	48.53	1	11	11	25	340	36.7168	5.99854
Q0BAC8	3-isopropylmalate dehydratase large subunit OS=Burkholderia ambifaria (strain ATCC BAA-244 / AMMD) OX=339670 GN=leuC PE=3 SV=1 - [LEUC_BURCM]	789	49.47	1	15	15	29	469	50.6894	5.92236
Q0BDL7	Aminotransferase OS=Burkholderia ambifaria (strain ATCC BAA-244 / AMMD) OX=339670 GN=Bamb_2200 PE=3 SV=1 - [Q0BDL7_BURCM]	778.19	55.53	2	15	15	34	461	50.8208	6.771
Q0BJ77	Orotate phosphoribosyltransferase OS=Burkholderia ambifaria (strain ATCC BAA-244 / AMMD) OX=339670 GN=pyrE PE=3 SV=1 - [Q0BJ77_BURCM]	778.09	68.42	1	12	12	38	228	25.513	6.65381
Q0BH98	DNA gyrase subunit A OS=Burkholderia ambifaria (strain ATCC BAA-244 / AMMD) OX=339670 GN=gyrA PE=3 SV=1 - [Q0BH98_BURCM]	773.84	29.07	1	17	17	29	867	96.3273	5.42725
Q0BD84	Phosphoribosylamine--glycine ligase OS=Burkholderia ambifaria (strain ATCC BAA-244 / AMMD) OX=339670 GN=purD PE=3 SV=1 - [Q0BD84_BURCM]	770.26	46.71	1	12	12	28	426	45.5042	6.26514
Q0BDR3	Peptide chain release factor 2 OS=Burkholderia ambifaria (strain ATCC BAA-244 / AMMD) OX=339670 GN=prfB PE=3 SV=1 - [Q0BDR3_BURCM]	769.33	41.38	1	13	13	26	406	45.2945	6.7417
Q0BES0	DegT/DnrJ/EryC1/StrS aminotransferase OS=Burkholderia ambifaria (strain ATCC BAA-244 / AMMD) OX=339670 GN=Bamb_1797 PE=3 SV=1 - [Q0BES0_BURCM]	768.17	57.18	1	16	16	33	404	44.1286	6.45557
Q0B582	Uncharacterized protein OS=Burkholderia ambifaria (strain ATCC BAA-244 / AMMD) OX=339670 GN=Bamb_5142 PE=4 SV=1 - [Q0B582_BURCM]	764.5	93.64	1	9	9	25	110	11.6291	5.40186
Q0BJ14	Cytochrome c, class I OS=Burkholderia ambifaria (strain ATCC BAA-244 / AMMD) OX=339670 GN=Bamb_0299 PE=4 SV=1 - [Q0BJ14_BURCM]	761.97	47.47	1	8	8	24	217	22.5002	8.74854
Q0B106	TrbM family protein OS=Burkholderia ambifaria (strain ATCC BAA-244 / AMMD) OX=339670 GN=Bamb_6624 PE=4 SV=1 - [Q0B106_BURCM]	755.56	67.69	1	9	9	23	195	21.5297	8.23584
Q0BJ87	6-phosphogluconate dehydrogenase, NAD-binding protein OS=Burkholderia ambifaria (strain ATCC BAA-244 / AMMD) OX=339670 GN=Bamb_0226 PE=4 SV=1 - [Q0BJ87_BURCM]	754.58	49.48	1	8	8	19	289	30.1607	6.02393
Q0B790	L-valine-binding protein / L-isoleucine-binding protein / L-leucine-binding protein OS=Burkholderia ambifaria (strain ATCC BAA-244 / AMMD) OX=339670 GN=Bamb_4432 PE=4 SV=1 - [Q0B790_BURCM]	748.81	58.33	1	15	15	37	372	39.009	8.83643
Q0BBY0	L-threonine dehydratase OS=Burkholderia ambifaria (strain ATCC BAA-244 / AMMD) OX=339670 GN=ilvA PE=3 SV=1 - [Q0BBY0_BURCM]	743.22	46.35	1	15	15	28	507	55.4084	6.16357
Q0B3N4	Aconitate hydratase B OS=Burkholderia ambifaria (strain ATCC BAA-244 / AMMD) OX=339670 GN=Bamb_5692 PE=3 SV=1 - [Q0B3N4_BURCM]	736.25	27.64	1	19	19	33	861	92.6664	5.47803
Q0BE17	Uridylate kinase OS=Burkholderia ambifaria (strain ATCC BAA-244 / AMMD) OX=339670 GN=pyrH PE=3 SV=1 - [PYRH_BURCM]	734.84	59.49	1	10	10	29	237	25.1871	8.11865
Q0B5Y9	PRC-barrel domain protein OS=Burkholderia ambifaria (strain ATCC BAA-244 / AMMD) OX=339670 GN=Bamb_4885 PE=4 SV=1 - [Q0B5Y9_BURCM]	734.75	52.82	1	5	5	40	142	14.6699	9.49561
Q0B6A7	Succinylglutamate desuccinylase/aspartoacylase OS=Burkholderia ambifaria (strain ATCC BAA-244 / AMMD) OX=339670 GN=Bamb_4766 PE=4 SV=1 - [Q0B6A7_BURCM]	726.18	61.46	1	15	15	35	371	40.372	5.5542
Q0BDG7	3-hydroxybutyrate dehydrogenase OS=Burkholderia ambifaria (strain ATCC BAA-244 / AMMD) OX=339670 GN=Bamb_2250 PE=3 SV=1 - [Q0BDG7_BURCM]	726.06	51.53	1	1	10	30	262	27.3042	6.53662
Q0BDM6	Uncharacterized protein OS=Burkholderia ambifaria (strain ATCC BAA-244 / AMMD) OX=339670 GN=Bamb_2191 PE=4 SV=1 - [Q0BDM6_BURCM]	723.96	39.21	1	10	10	27	329	35.7379	9.23193
Q0BG01	Phenylalanine--tRNA ligase beta subunit OS=Burkholderia ambifaria (strain ATCC BAA-244 / AMMD) OX=339670 GN=pheT PE=3 SV=1 - [Q0BG01_BURCM]	723.47	36.09	1	22	22	36	809	88.6451	5.64307
Q0BED8	Alkyl hydroperoxide reductase AhpD OS=Burkholderia ambifaria (strain ATCC BAA-244 / AMMD) OX=339670 GN=ahpD PE=3 SV=1 - [Q0BED8_BURCM]	721.16	56	1	8	8	31	175	18.7696	6.32861
Q0BIA1	Glutamate dehydrogenase OS=Burkholderia ambifaria (strain ATCC BAA-244 / AMMD) OX=339670 GN=Bamb_0563 PE=3 SV=1 - [Q0BIA1_BURCM]	715.56	43.22	1	13	13	31	428	46.4528	6.7417
Q0BH57	Uncharacterized protein OS=Burkholderia ambifaria (strain ATCC BAA-244 / AMMD) OX=339670 GN=Bamb_0957 PE=4 SV=1 - [Q0BH57_BURCM]	710.74	57.46	1	17	17	30	456	48.8058	5.97314
Q0BJ57	50S ribosomal protein L1 OS=Burkholderia ambifaria (strain ATCC BAA-244 / AMMD) OX=339670 GN=rplA PE=3 SV=1 - [RL1_BURCM]	709.31	63.79	1	13	13	29	232	24.2661	9.70068
Q0BJC4	Methylenetetrahydrofolate reductase OS=Burkholderia ambifaria (strain ATCC BAA-244 / AMMD) OX=339670 GN=Bamb_0188 PE=3 SV=1 - [Q0BJC4_BURCM]	698.87	68.48	1	13	13	27	276	30.4355	7.50342
Q0BBE5	Extracellular solute-binding protein, family 5 OS=Burkholderia ambifaria (strain ATCC BAA-244 / AMMD) OX=339670 GN=Bamb_2972 PE=4 SV=1 - [Q0BBE5_BURCM]	691.62	35.78	1	13	13	30	531	57.3976	8.67529
Q0BH85	ADP-L-glycero-D-manno-heptose-6-epimerase OS=Burkholderia ambifaria (strain ATCC BAA-244 / AMMD) OX=339670 GN=hldD PE=3 SV=1 - [HLDD_BURCM]	681.27	59.39	1	14	14	28	330	37.0366	6.27783
Q0BIG2	PfkB domain protein OS=Burkholderia ambifaria (strain ATCC BAA-244 / AMMD) OX=339670 GN=Bamb_0502 PE=4 SV=1 - [Q0BIG2_BURCM]	677.34	56.88	1	14	14	29	320	34.4614	5.73193
Q0BB19	Ferredoxin--NADP(+) reductase OS=Burkholderia ambifaria (strain ATCC BAA-244 / AMMD) OX=339670 GN=Bamb_3098 PE=4 SV=1 - [Q0BB19_BURCM]	671.04	75.78	1	15	15	33	256	28.5936	6.16357
Q0BHS3	Dihydroorotase OS=Burkholderia ambifaria (strain ATCC BAA-244 / AMMD) OX=339670 GN=Bamb_0741 PE=4 SV=1 - [Q0BHS3_BURCM]	665.96	43.69	1	12	12	28	428	45.0365	5.77002
Q0BBF6	Fumarylacetoacetate (FAA) hydrolase OS=Burkholderia ambifaria (strain ATCC BAA-244 / AMMD) OX=339670 GN=Bamb_2961 PE=4 SV=1 - [Q0BBF6_BURCM]	664.64	44.55	1	11	11	22	330	35.8769	5.45264
Q0BIJ1	Arginine biosynthesis bifunctional protein ArgJ OS=Burkholderia ambifaria (strain ATCC BAA-244 / AMMD) OX=339670 GN=argJ PE=3 SV=1 - [Q0BIJ1_BURCM]	663.57	46.49	1	12	12	28	413	43.5635	5.59229
Q0BAT2	DNA topoisomerase III OS=Burkholderia ambifaria (strain ATCC BAA-244 / AMMD) OX=339670 GN=Bamb_3185 PE=4 SV=1 - [Q0BAT2_BURCM]	660	22.89	1	14	14	22	865	96.5456	8.30908
Q0BG15	3-oxoacid CoA-transferase, A subunit OS=Burkholderia ambifaria (strain ATCC BAA-244 / AMMD) OX=339670 GN=Bamb_1350 PE=4 SV=1 - [Q0BG15_BURCM]	656.63	79.49	1	11	11	25	234	25.2611	6.59521
Q0BGZ7	Elongation factor P OS=Burkholderia ambifaria (strain ATCC BAA-244 / AMMD) OX=339670 GN=efp PE=3 SV=1 - [EFP_BURCM]	654.22	47.03	1	8	8	31	185	20.8273	4.90674
Q0BBY5	Import inner membrane translocase, subunit Tim44 OS=Burkholderia ambifaria (strain ATCC BAA-244 / AMMD) OX=339670 GN=Bamb_2782 PE=4 SV=1 - [Q0BBY5_BURCM]	652.49	26.74	1	6	6	16	344	35.9792	9.68604
Q0BIJ9	D-alanine--D-alanine ligase OS=Burkholderia ambifaria (strain ATCC BAA-244 / AMMD) OX=339670 GN=ddl PE=3 SV=1 - [DDL_BURCM]	648.86	68.37	1	14	14	29	313	33.3862	5.32568
Q0BI76	Aminopeptidase P, Metallo peptidase, MEROPS family M24B OS=Burkholderia ambifaria (strain ATCC BAA-244 / AMMD) OX=339670 GN=Bamb_0588 PE=3 SV=1 - [Q0BI76_BURCM]	643.49	43.53	1	14	14	28	464	50.6884	5.60498
Q0BJ56	50S ribosomal protein L10 OS=Burkholderia ambifaria (strain ATCC BAA-244 / AMMD) OX=339670 GN=rplJ PE=3 SV=1 - [Q0BJ56_BURCM]	639.86	54.79	1	7	7	21	188	20.5331	9.80322
Q0BEX7	ATP phosphoribosyltransferase regulatory subunit OS=Burkholderia ambifaria (strain ATCC BAA-244 / AMMD) OX=339670 GN=hisZ PE=3 SV=1 - [HISZ_BURCM]	639.84	52.36	1	14	14	26	382	41.6278	5.80811
Q0BBR5	Sigma 54 modulation protein / SSU ribosomal protein S30P OS=Burkholderia ambifaria (strain ATCC BAA-244 / AMMD) OX=339670 GN=Bamb_2852 PE=4 SV=1 - [Q0BBR5_BURCM]	637.74	65.55	1	6	6	34	119	13.6413	6.96143
Q0BIU7	Amino acid ABC transporter substrate-binding protein, PAAT family OS=Burkholderia ambifaria (strain ATCC BAA-244 / AMMD) OX=339670 GN=Bamb_0366 PE=4 SV=1 - [Q0BIU7_BURCM]	626.08	46.62	1	10	10	24	266	28.9133	9.43701
Q0B6Y8	Substrate-binding region of ABC-type glycine betaine transport system OS=Burkholderia ambifaria (strain ATCC BAA-244 / AMMD) OX=339670 GN=Bamb_4535 PE=4 SV=1 - [Q0B6Y8_BURCM]	624.35	61.44	1	11	11	25	306	31.904	9.12939
Q0BDZ6	Alanine racemase OS=Burkholderia ambifaria (strain ATCC BAA-244 / AMMD) OX=339670 GN=Bamb_2071 PE=3 SV=1 - [Q0BDZ6_BURCM]	622.92	41.01	1	10	11	24	356	38.1736	7.47412
Q0BGM2	3-hydroxyacyl-CoA dehydrogenase, NAD-binding protein OS=Burkholderia ambifaria (strain ATCC BAA-244 / AMMD) OX=339670 GN=Bamb_1143 PE=4 SV=1 - [Q0BGM2_BURCM]	618.8	35.08	1	10	10	20	305	32.9871	5.66846
Q0BB88	Glutamine--fructose-6-phosphate aminotransferase [isomerizing] OS=Burkholderia ambifaria (strain ATCC BAA-244 / AMMD) OX=339670 GN=glmS PE=3 SV=1 - [Q0BB88_BURCM]	616.69	38.35	2	13	13	27	605	65.4639	6.30322
Q0B9P8	Extracellular solute-binding protein, family 5 OS=Burkholderia ambifaria (strain ATCC BAA-244 / AMMD) OX=339670 GN=Bamb_3571 PE=4 SV=1 - [Q0B9P8_BURCM]	614.33	42.5	1	17	17	30	520	57.3716	9.18799
Q0BHE9	Cold-shock DNA-binding protein family OS=Burkholderia ambifaria (strain ATCC BAA-244 / AMMD) OX=339670 GN=Bamb_0865 PE=4 SV=1 - [Q0BHE9_BURCM]	613.53	43.28	1	1	2	21	67	7.43374	7.25439
Q0BIQ8	Nitroreductase OS=Burkholderia ambifaria (strain ATCC BAA-244 / AMMD) OX=339670 GN=Bamb_0406 PE=4 SV=1 - [Q0BIQ8_BURCM]	613.47	76.12	1	8	8	25	201	21.6112	7.21045
Q0BCG6	Ornithine carbamoyltransferase OS=Burkholderia ambifaria (strain ATCC BAA-244 / AMMD) OX=339670 GN=argF PE=3 SV=1 - [Q0BCG6_BURCM]	611.46	32.5	1	11	11	27	560	63.1454	8.66064
Q0BI46	Ferritin, Dps family protein OS=Burkholderia ambifaria (strain ATCC BAA-244 / AMMD) OX=339670 GN=Bamb_0618 PE=3 SV=1 - [Q0BI46_BURCM]	611.32	49.38	1	6	6	17	162	18.0803	6.0874
Q0B8Z7	Alcohol dehydrogenase GroES domain protein OS=Burkholderia ambifaria (strain ATCC BAA-244 / AMMD) OX=339670 GN=Bamb_3822 PE=3 SV=1 - [Q0B8Z7_BURCM]	610.2	53.47	1	12	12	27	346	37.0511	6.60986
Q0BHS4	Aspartate carbamoyltransferase OS=Burkholderia ambifaria (strain ATCC BAA-244 / AMMD) OX=339670 GN=pyrB PE=3 SV=1 - [PYRB_BURCM]	609.79	49.56	1	12	12	25	343	37.2535	8.63135
Q0B452	Dyp-type peroxidase family OS=Burkholderia ambifaria (strain ATCC BAA-244 / AMMD) OX=339670 GN=Bamb_5524 PE=4 SV=1 - [Q0B452_BURCM]	608.74	39.93	1	8	8	20	293	32.0549	5.03369
Q0BHY2	Short-chain dehydrogenase/reductase SDR OS=Burkholderia ambifaria (strain ATCC BAA-244 / AMMD) OX=339670 GN=Bamb_0682 PE=3 SV=1 - [Q0BHY2_BURCM]	605.12	59.27	1	8	8	24	248	26.1246	6.53662
Q0BFU2	Monosaccharide ABC transporter substrate-binding protein, CUT2 family OS=Burkholderia ambifaria (strain ATCC BAA-244 / AMMD) OX=339670 GN=Bamb_1423 PE=4 SV=1 - [Q0BFU2_BURCM]	602.79	45.54	1	8	8	19	314	32.7991	9.12939
Q0BCB9	Periplasmic solute binding protein OS=Burkholderia ambifaria (strain ATCC BAA-244 / AMMD) OX=339670 GN=Bamb_2648 PE=3 SV=1 - [Q0BCB9_BURCM]	601.04	51.97	1	9	9	21	304	32.3788	9.46631
Q0BGJ8	Carbamoyl-phosphate synthase small chain OS=Burkholderia ambifaria (strain ATCC BAA-244 / AMMD) OX=339670 GN=carA PE=3 SV=1 - [Q0BGJ8_BURCM]	598.26	44.21	1	12	12	25	380	40.7656	5.92236
Q0BJ31	50S ribosomal protein L6 OS=Burkholderia ambifaria (strain ATCC BAA-244 / AMMD) OX=339670 GN=rplF PE=3 SV=1 - [RL6_BURCM]	594.69	77.27	1	11	11	21	176	18.6841	9.65674
Q0B4B3	Amino acid ABC transporter substrate-binding protein, PAAT family OS=Burkholderia ambifaria (strain ATCC BAA-244 / AMMD) OX=339670 GN=Bamb_5463 PE=3 SV=1 - [Q0B4B3_BURCM]	592.38	38.91	1	1	8	24	257	27.7753	8.1626
Q0BHJ2	Glutamate-1-semialdehyde 2,1-aminomutase OS=Burkholderia ambifaria (strain ATCC BAA-244 / AMMD) OX=339670 GN=hemL PE=3 SV=1 - [GSA_BURCM]	591.05	42.15	1	12	12	25	427	44.9308	6.0874
Q0BGU4	Redoxin domain protein OS=Burkholderia ambifaria (strain ATCC BAA-244 / AMMD) OX=339670 GN=Bamb_1070 PE=4 SV=1 - [Q0BGU4_BURCM]	590.46	54.1	1	8	8	22	183	19.5462	8.646
Q0BDT3	Tryptophan--tRNA ligase OS=Burkholderia ambifaria (strain ATCC BAA-244 / AMMD) OX=339670 GN=trpS PE=3 SV=1 - [Q0BDT3_BURCM]	587.93	41	1	15	15	34	400	45.4139	6.30322
Q0BBH6	UPF0250 protein Bamb_2941 OS=Burkholderia ambifaria (strain ATCC BAA-244 / AMMD) OX=339670 GN=Bamb_2941 PE=3 SV=1 - [Q0BBH6_BURCM]	587.65	72.55	1	7	7	15	102	11.3829	5.47803
Q0BDB9	2-isopropylmalate synthase OS=Burkholderia ambifaria (strain ATCC BAA-244 / AMMD) OX=339670 GN=leuA PE=3 SV=1 - [LEU1_BURCM]	585.73	40.08	1	15	15	31	514	55.5065	5.80811
Q0BBS6	Formyltetrahydrofolate deformylase OS=Burkholderia ambifaria (strain ATCC BAA-244 / AMMD) OX=339670 GN=purU PE=3 SV=1 - [Q0BBS6_BURCM]	580.1	42.86	1	8	8	20	294	32.9407	6.52197
Q0BCF0	Cyclopropane-fatty-acyl-phospholipid synthase OS=Burkholderia ambifaria (strain ATCC BAA-244 / AMMD) OX=339670 GN=Bamb_2617 PE=4 SV=1 - [Q0BCF0_BURCM]	569.68	37.19	1	9	9	19	406	45.9424	6.13818
Q0BHI7	Glucose-6-phosphate 1-dehydrogenase OS=Burkholderia ambifaria (strain ATCC BAA-244 / AMMD) OX=339670 GN=zwf PE=3 SV=1 - [Q0BHI7_BURCM]	553.5	30.47	1	12	12	23	489	54.5213	6.43018
Q0BAF3	Uncharacterized protein OS=Burkholderia ambifaria (strain ATCC BAA-244 / AMMD) OX=339670 GN=Bamb_3315 PE=4 SV=1 - [Q0BAF3_BURCM]	548.33	62.22	1	4	4	14	90	10.6504	5.30029
Q0BIB2	Gamma-glutamyl phosphate reductase OS=Burkholderia ambifaria (strain ATCC BAA-244 / AMMD) OX=339670 GN=proA PE=3 SV=1 - [PROA_BURCM]	547.68	32.62	1	11	11	21	423	45.1035	6.17627
Q0BCJ8	Multicopper oxidase, type 3 OS=Burkholderia ambifaria (strain ATCC BAA-244 / AMMD) OX=339670 GN=Bamb_2569 PE=4 SV=1 - [Q0BCJ8_BURCM]	546.79	20.72	1	9	9	17	531	57.7597	7.07861
Q0BIP6	Peptidase M24 OS=Burkholderia ambifaria (strain ATCC BAA-244 / AMMD) OX=339670 GN=Bamb_0418 PE=4 SV=1 - [Q0BIP6_BURCM]	543.88	37.58	1	13	13	21	604	65.1594	6.34131
Q0BFN1	Aldo/keto reductase OS=Burkholderia ambifaria (strain ATCC BAA-244 / AMMD) OX=339670 GN=Bamb_1484 PE=4 SV=1 - [Q0BFN1_BURCM]	538.64	34	1	9	9	20	350	38.846	6.81494
Q0BHI6	Carbohydrate ABC transporter substrate-binding protein, CUT1 family OS=Burkholderia ambifaria (strain ATCC BAA-244 / AMMD) OX=339670 GN=Bamb_0828 PE=4 SV=1 - [Q0BHI6_BURCM]	537.26	34.7	1	9	9	20	415	44.1516	8.95361
Q0BG14	Butyryl-CoA:acetate CoA transferase OS=Burkholderia ambifaria (strain ATCC BAA-244 / AMMD) OX=339670 GN=Bamb_1351 PE=4 SV=1 - [Q0BG14_BURCM]	536.46	41.78	1	6	6	16	213	22.2045	4.75439
Q0BDU7	Inositol-1-monophosphatase OS=Burkholderia ambifaria (strain ATCC BAA-244 / AMMD) OX=339670 GN=Bamb_2120 PE=3 SV=1 - [Q0BDU7_BURCM]	536.08	46.44	1	10	10	17	267	29.5141	5.84619
Q0BI20	Protein GrpE OS=Burkholderia ambifaria (strain ATCC BAA-244 / AMMD) OX=339670 GN=grpE PE=3 SV=1 - [Q0BI20_BURCM]	533.21	70.72	1	8	8	19	181	19.361	5.04639
Q0B1N6	10 kDa chaperonin OS=Burkholderia ambifaria (strain ATCC BAA-244 / AMMD) OX=339670 GN=groS PE=3 SV=1 - [Q0B1N6_BURCM]	532.12	82.86	1	6	7	22	105	11.32	5.24951
Q0BCP1	Amino acid/amide ABC transporter substrate-binding protein, HAAT family OS=Burkholderia ambifaria (strain ATCC BAA-244 / AMMD) OX=339670 GN=Bamb_2526 PE=4 SV=1 - [Q0BCP1_BURCM]	530.26	28.57	1	7	7	14	385	40.4553	9.17334
Q0B2T5	Carboxymethylenebutenolidase OS=Burkholderia ambifaria (strain ATCC BAA-244 / AMMD) OX=339670 GN=Bamb_5994 PE=4 SV=1 - [Q0B2T5_BURCM]	530.09	67.51	1	10	10	22	237	26.2141	5.42725
Q0BIL6	Phenylacetic acid degradation protein paaN OS=Burkholderia ambifaria (strain ATCC BAA-244 / AMMD) OX=339670 GN=Bamb_0448 PE=4 SV=1 - [Q0BIL6_BURCM]	527.35	31.34	1	11	11	19	568	60.375	6.30322
Q0BJ54	DNA-directed RNA polymerase subunit beta OS=Burkholderia ambifaria (strain ATCC BAA-244 / AMMD) OX=339670 GN=rpoB PE=3 SV=1 - [RPOB_BURCM]	525.67	19.96	1	16	16	26	1368	153.175	5.68115
Q0BAC0	Tryptophan synthase beta chain OS=Burkholderia ambifaria (strain ATCC BAA-244 / AMMD) OX=339670 GN=trpB PE=3 SV=1 - [Q0BAC0_BURCM]	525.01	43.07	1	11	11	17	397	43.1197	6.23975
Q0BJ08	Iron-sulfur cluster assembly protein CyaY OS=Burkholderia ambifaria (strain ATCC BAA-244 / AMMD) OX=339670 GN=cyaY PE=3 SV=1 - [CYAY_BURCM]	522.27	69.44	1	6	6	17	108	11.9909	4.77979
Q0B6F6	Beta-ketoadipyl CoA thiolase OS=Burkholderia ambifaria (strain ATCC BAA-244 / AMMD) OX=339670 GN=Bamb_4717 PE=3 SV=1 - [Q0B6F6_BURCM]	520.32	41.13	1	6	12	21	406	42.4578	6.58057
Q0B7G6	Uncharacterized protein OS=Burkholderia ambifaria (strain ATCC BAA-244 / AMMD) OX=339670 GN=Bamb_4355 PE=4 SV=1 - [Q0B7G6_BURCM]	518.11	52.14	1	7	7	24	117	12.7707	6.68311
Q0BAC6	3-isopropylmalate dehydratase small subunit OS=Burkholderia ambifaria (strain ATCC BAA-244 / AMMD) OX=339670 GN=leuD PE=3 SV=1 - [LEUD_BURCM]	517.73	52.78	1	9	9	23	216	24.6285	7.02002
Q0B9S3	Dihydroxy-acid dehydratase OS=Burkholderia ambifaria (strain ATCC BAA-244 / AMMD) OX=339670 GN=ilvD PE=3 SV=1 - [Q0B9S3_BURCM]	516.84	27.46	1	11	11	21	619	66.3285	6.04932
Q0BC36	Glycerol kinase OS=Burkholderia ambifaria (strain ATCC BAA-244 / AMMD) OX=339670 GN=glpK PE=3 SV=1 - [GLPK_BURCM]	514.14	47.6	1	14	14	23	500	54.6147	5.75732
Q0BCW8	Amino acid ABC transporter substrate-binding protein, PAAT family OS=Burkholderia ambifaria (strain ATCC BAA-244 / AMMD) OX=339670 GN=Bamb_2449 PE=3 SV=1 - [Q0BCW8_BURCM]	513.9	61.24	1	10	10	17	258	28.2266	8.42627
Q0BID7	Orotidine 5'-phosphate decarboxylase OS=Burkholderia ambifaria (strain ATCC BAA-244 / AMMD) OX=339670 GN=pyrF PE=3 SV=1 - [Q0BID7_BURCM]	512.5	55.27	1	8	8	20	275	29.804	5.33838
Q0BED4	Acetylornithine deacetylase OS=Burkholderia ambifaria (strain ATCC BAA-244 / AMMD) OX=339670 GN=Bamb_1933 PE=3 SV=1 - [Q0BED4_BURCM]	511.55	37.93	1	9	9	19	406	43.7232	5.68115
Q0BJ35	50S ribosomal protein L24 OS=Burkholderia ambifaria (strain ATCC BAA-244 / AMMD) OX=339670 GN=rplX PE=3 SV=1 - [RL24_BURCM]	507.69	47.06	1	4	4	17	102	10.702	10.1694
Q0BDN0	Rhodanese domain protein OS=Burkholderia ambifaria (strain ATCC BAA-244 / AMMD) OX=339670 GN=Bamb_2187 PE=4 SV=1 - [Q0BDN0_BURCM]	507.37	57.14	1	6	6	15	182	20.0334	8.93896
Q0BDC8	Triosephosphate isomerase OS=Burkholderia ambifaria (strain ATCC BAA-244 / AMMD) OX=339670 GN=tpiA PE=3 SV=1 - [Q0BDC8_BURCM]	507.36	30.28	1	4	4	19	251	25.9804	6.63916
Q0BEQ9	50S ribosomal protein L9 OS=Burkholderia ambifaria (strain ATCC BAA-244 / AMMD) OX=339670 GN=rplI PE=3 SV=1 - [RL9_BURCM]	506.74	53.33	1	9	9	20	150	16.3508	7.50342
Q0BEV1	Thioredoxin OS=Burkholderia ambifaria (strain ATCC BAA-244 / AMMD) OX=339670 GN=Bamb_1766 PE=3 SV=1 - [Q0BEV1_BURCM]	505.87	68.52	1	6	6	16	108	11.7511	5.90967
Q0BJH7	Oxidoreductase domain protein OS=Burkholderia ambifaria (strain ATCC BAA-244 / AMMD) OX=339670 GN=Bamb_0135 PE=4 SV=1 - [Q0BJH7_BURCM]	504.45	70	1	13	13	23	350	37.9937	6.27783
Q0BE97	Uncharacterized protein OS=Burkholderia ambifaria (strain ATCC BAA-244 / AMMD) OX=339670 GN=Bamb_1970 PE=4 SV=1 - [Q0BE97_BURCM]	502.43	28.18	1	15	15	23	738	80.5699	6.85889
Q0B5S7	Toluene tolerance family protein OS=Burkholderia ambifaria (strain ATCC BAA-244 / AMMD) OX=339670 GN=Bamb_4947 PE=4 SV=1 - [Q0B5S7_BURCM]	501.5	37.04	1	7	7	17	216	23.4629	9.34912
Q0BI94	Dihydroorotase OS=Burkholderia ambifaria (strain ATCC BAA-244 / AMMD) OX=339670 GN=pyrC PE=3 SV=1 - [Q0BI94_BURCM]	500.87	54.8	1	13	13	27	354	38.5735	6.63916
Q0B3L5	Respiratory nitrate reductase alpha subunit apoprotein OS=Burkholderia ambifaria (strain ATCC BAA-244 / AMMD) OX=339670 GN=Bamb_5711 PE=3 SV=1 - [Q0B3L5_BURCM]	500.48	21.94	1	18	18	26	1281	142.95	6.50732
Q0BFY4	Transcription termination/antitermination protein NusA OS=Burkholderia ambifaria (strain ATCC BAA-244 / AMMD) OX=339670 GN=nusA PE=3 SV=1 - [Q0BFY4_BURCM]	500.17	30.14	1	11	11	20	491	54.7873	4.69092
Q0BIH2	Phosphoribosyltransferase OS=Burkholderia ambifaria (strain ATCC BAA-244 / AMMD) OX=339670 GN=Bamb_0492 PE=4 SV=1 - [Q0BIH2_BURCM]	497.96	57.38	1	7	7	22	183	20.4433	5.59229
Q0BG02	Phenylalanine--tRNA ligase alpha subunit OS=Burkholderia ambifaria (strain ATCC BAA-244 / AMMD) OX=339670 GN=pheS PE=3 SV=1 - [Q0BG02_BURCM]	497.89	32.75	1	9	9	17	345	38.9967	5.63037
Q0BD55	Glycoside hydrolase 15-related protein OS=Burkholderia ambifaria (strain ATCC BAA-244 / AMMD) OX=339670 GN=Bamb_2362 PE=4 SV=1 - [Q0BD55_BURCM]	494.83	38.79	1	15	15	25	611	67.9602	5.73193
Q0BIZ2	Glutamate synthase (NADH) large subunit OS=Burkholderia ambifaria (strain ATCC BAA-244 / AMMD) OX=339670 GN=Bamb_0321 PE=4 SV=1 - [Q0BIZ2_BURCM]	494.04	16.02	1	18	18	24	1567	170.879	6.87354
Q0B417	Peptidyl-prolyl cis-trans isomerase OS=Burkholderia ambifaria (strain ATCC BAA-244 / AMMD) OX=339670 GN=Bamb_5559 PE=3 SV=1 - [Q0B417_BURCM]	493.42	71.68	1	7	7	26	113	11.843	4.93213
Q0BIL8	Enoyl-CoA hydratase OS=Burkholderia ambifaria (strain ATCC BAA-244 / AMMD) OX=339670 GN=Bamb_0446 PE=3 SV=1 - [Q0BIL8_BURCM]	492.73	59.7	1	10	10	16	263	28.1996	5.50342
Q0BDC5	30S ribosomal protein S15 OS=Burkholderia ambifaria (strain ATCC BAA-244 / AMMD) OX=339670 GN=rpsO PE=3 SV=1 - [RS15_BURCM]	492.06	41.57	1	4	4	12	89	10.1196	10.5649
Q0BI44	Pyrroline-5-carboxylate reductase OS=Burkholderia ambifaria (strain ATCC BAA-244 / AMMD) OX=339670 GN=proC PE=3 SV=1 - [Q0BI44_BURCM]	489.26	45.19	1	7	7	14	270	27.5125	5.31299
Q0BHQ4	NAD-dependent epimerase/dehydratase OS=Burkholderia ambifaria (strain ATCC BAA-244 / AMMD) OX=339670 GN=Bamb_0760 PE=4 SV=1 - [Q0BHQ4_BURCM]	488	39.34	1	9	9	15	305	33.3322	5.57959
Q0BH93	3-phosphoshikimate 1-carboxyvinyltransferase OS=Burkholderia ambifaria (strain ATCC BAA-244 / AMMD) OX=339670 GN=aroA PE=3 SV=1 - [AROA_BURCM]	486.08	32.49	1	10	10	19	434	46.3349	6.01123
Q0BJ43	50S ribosomal protein L2 OS=Burkholderia ambifaria (strain ATCC BAA-244 / AMMD) OX=339670 GN=rplB PE=3 SV=1 - [RL2_BURCM]	485.95	41.82	1	10	10	18	275	30.082	11.3413
Q0BJP1	Adenylate cyclase OS=Burkholderia ambifaria (strain ATCC BAA-244 / AMMD) OX=339670 GN=Bamb_0071 PE=4 SV=1 - [Q0BJP1_BURCM]	484.99	37.29	1	5	5	14	177	19.8711	5.12256
Q0BCM9	Acetylornithine aminotransferase OS=Burkholderia ambifaria (strain ATCC BAA-244 / AMMD) OX=339670 GN=argD PE=3 SV=1 - [Q0BCM9_BURCM]	481.86	37.2	1	11	11	22	465	50.8791	6.62451
Q0BAG1	Uncharacterized protein OS=Burkholderia ambifaria (strain ATCC BAA-244 / AMMD) OX=339670 GN=Bamb_3307 PE=4 SV=1 - [Q0BAG1_BURCM]	481.61	57.99	1	8	8	23	169	17.8604	9.77393
Q0B3R1	Dyp-type peroxidase family OS=Burkholderia ambifaria (strain ATCC BAA-244 / AMMD) OX=339670 GN=Bamb_5665 PE=4 SV=1 - [Q0B3R1_BURCM]	475.87	29.78	1	6	6	13	356	38.259	4.93213
Q0B4T1	PEP phosphonomutase OS=Burkholderia ambifaria (strain ATCC BAA-244 / AMMD) OX=339670 GN=Bamb_5295 PE=4 SV=1 - [Q0B4T1_BURCM]	473.34	50.2	1	8	8	16	255	26.7967	5.22412
Q0BG53	Methylmalonate-semialdehyde dehydrogenase (Acylating) OS=Burkholderia ambifaria (strain ATCC BAA-244 / AMMD) OX=339670 GN=Bamb_1312 PE=4 SV=1 - [Q0BG53_BURCM]	471.98	43.48	1	13	13	25	506	54.0555	6.0874
Q0B759	Aminotransferase, class V OS=Burkholderia ambifaria (strain ATCC BAA-244 / AMMD) OX=339670 GN=Bamb_4464 PE=3 SV=1 - [Q0B759_BURCM]	468.59	34.64	1	8	8	17	384	41.5431	5.50342
Q0B1H5	Phenazine biosynthesis protein PhzF family OS=Burkholderia ambifaria (strain ATCC BAA-244 / AMMD) OX=339670 GN=Bamb_6454 PE=4 SV=1 - [Q0B1H5_BURCM]	467.66	54.79	1	8	8	15	292	31.3843	5.36377
Q0B7P4	Uncharacterized protein OS=Burkholderia ambifaria (strain ATCC BAA-244 / AMMD) OX=339670 GN=Bamb_4276 PE=4 SV=1 - [Q0B7P4_BURCM]	467.15	48.84	1	5	5	14	129	14.4192	8.47021
Q0B5L5	Universal stress protein OS=Burkholderia ambifaria (strain ATCC BAA-244 / AMMD) OX=339670 GN=Bamb_5009 PE=3 SV=1 - [Q0B5L5_BURCM]	463.74	56.41	1	6	6	12	156	16.5376	6.06201
Q0BE31	Putative phosphoenolpyruvate synthase regulatory protein OS=Burkholderia ambifaria (strain ATCC BAA-244 / AMMD) OX=339670 GN=Bamb_2036 PE=3 SV=1 - [PSRP_BURCM]	463.32	33.58	1	7	7	14	271	30.6287	6.06201
Q0B629	Glyoxalase/bleomycin resistance protein/dioxygenase OS=Burkholderia ambifaria (strain ATCC BAA-244 / AMMD) OX=339670 GN=Bamb_4845 PE=4 SV=1 - [Q0B629_BURCM]	461.74	64.57	1	6	6	13	127	13.8307	5.66846
Q0BBR4	Putative PTS IIA-like nitrogen-regulatory protein PtsN OS=Burkholderia ambifaria (strain ATCC BAA-244 / AMMD) OX=339670 GN=Bamb_2853 PE=4 SV=1 - [Q0BBR4_BURCM]	461.42	44.13	1	6	6	17	179	19.6494	6.69775
Q0B112	Uncharacterized protein OS=Burkholderia ambifaria (strain ATCC BAA-244 / AMMD) OX=339670 GN=Bamb_6618 PE=4 SV=1 - [Q0B112_BURCM]	457.89	69.84	1	4	4	13	126	13.4787	6.15088
Q0BIQ6	Cold-shock DNA-binding protein family OS=Burkholderia ambifaria (strain ATCC BAA-244 / AMMD) OX=339670 GN=Bamb_0408 PE=4 SV=1 - [Q0BIQ6_BURCM]	454.9	47.76	1	2	2	12	67	7.35374	5.97314
Q0BAR0	YaeQ family protein OS=Burkholderia ambifaria (strain ATCC BAA-244 / AMMD) OX=339670 GN=Bamb_3207 PE=4 SV=1 - [Q0BAR0_BURCM]	454.05	49.28	1	7	7	15	207	22.8848	8.19189
Q0BJI0	Glycine cleavage system H protein OS=Burkholderia ambifaria (strain ATCC BAA-244 / AMMD) OX=339670 GN=gcvH PE=3 SV=1 - [Q0BJI0_BURCM]	447.36	38.56	1	4	4	27	153	16.1161	4.55127
Q0BAM2	Sulfurtransferase OS=Burkholderia ambifaria (strain ATCC BAA-244 / AMMD) OX=339670 GN=Bamb_3246 PE=4 SV=1 - [Q0BAM2_BURCM]	446.54	35.64	1	6	6	14	289	30.5614	6.65381
Q0B677	Enoyl-[acyl-carrier-protein] reductase [NADH] OS=Burkholderia ambifaria (strain ATCC BAA-244 / AMMD) OX=339670 GN=fabV PE=3 SV=1 - [FABV_BURCM]	446.49	33.25	1	9	9	20	400	43.3562	5.36377
Q0B657	L-threonine aldolase OS=Burkholderia ambifaria (strain ATCC BAA-244 / AMMD) OX=339670 GN=Bamb_4817 PE=4 SV=1 - [Q0B657_BURCM]	444.36	59.05	1	11	11	17	337	35.7503	6.60986
Q0BG18	Short-chain dehydrogenase/reductase SDR OS=Burkholderia ambifaria (strain ATCC BAA-244 / AMMD) OX=339670 GN=Bamb_1347 PE=4 SV=1 - [Q0BG18_BURCM]	442.49	53.88	1	10	10	19	258	27.6905	7.50342
Q0BDF7	Peptidase M14, carboxypeptidase A OS=Burkholderia ambifaria (strain ATCC BAA-244 / AMMD) OX=339670 GN=Bamb_2260 PE=4 SV=1 - [Q0BDF7_BURCM]	442.47	54.95	1	16	16	26	384	42.919	5.19873
Q0BG31	FAD linked oxidase domain protein OS=Burkholderia ambifaria (strain ATCC BAA-244 / AMMD) OX=339670 GN=Bamb_1334 PE=4 SV=1 - [Q0BG31_BURCM]	442.17	47.15	1	11	11	20	473	50.4261	6.34131
Q0BCF1	Pyridoxine/pyridoxamine 5'-phosphate oxidase OS=Burkholderia ambifaria (strain ATCC BAA-244 / AMMD) OX=339670 GN=pdxH PE=3 SV=1 - [PDXH_BURCM]	439.81	26.17	1	4	4	10	214	24.2604	6.62451
Q0BH19	50S ribosomal protein L32 OS=Burkholderia ambifaria (strain ATCC BAA-244 / AMMD) OX=339670 GN=rpmF PE=3 SV=1 - [RL32_BURCM]	439.7	54.24	1	2	2	10	59	6.64846	10.2866
Q0BH96	Phosphoserine aminotransferase OS=Burkholderia ambifaria (strain ATCC BAA-244 / AMMD) OX=339670 GN=serC PE=3 SV=1 - [SERC_BURCM]	439.17	38.89	1	10	10	22	360	39.329	5.85889
Q0BJ53	DNA-directed RNA polymerase subunit beta' OS=Burkholderia ambifaria (strain ATCC BAA-244 / AMMD) OX=339670 GN=rpoC PE=3 SV=1 - [RPOC_BURCM]	436.83	23.35	1	23	23	33	1413	156.151	6.85889
Q0B9T4	2,3-dimethylmalate lyase OS=Burkholderia ambifaria (strain ATCC BAA-244 / AMMD) OX=339670 GN=Bamb_3535 PE=4 SV=1 - [Q0B9T4_BURCM]	434.57	20.32	1	10	10	15	561	61.0922	5.41455
Q0BDS2	2-dehydro-3-deoxyphosphooctonate aldolase OS=Burkholderia ambifaria (strain ATCC BAA-244 / AMMD) OX=339670 GN=kdsA PE=3 SV=1 - [Q0BDS2_BURCM]	431.46	44.72	1	12	12	24	284	30.9086	6.0874
Q0BHJ5	Uncharacterized protein OS=Burkholderia ambifaria (strain ATCC BAA-244 / AMMD) OX=339670 GN=Bamb_0819 PE=4 SV=1 - [Q0BHJ5_BURCM]	431.18	52.91	1	7	7	18	172	19.0769	6.52197
Q0B5Q1	L-threonine 3-dehydrogenase OS=Burkholderia ambifaria (strain ATCC BAA-244 / AMMD) OX=339670 GN=tdh PE=3 SV=1 - [TDH_BURCM]	430.99	37.13	1	9	9	23	342	37.349	6.65381
Q0BHF7	Ribonuclease PH OS=Burkholderia ambifaria (strain ATCC BAA-244 / AMMD) OX=339670 GN=rph PE=3 SV=1 - [RNPH_BURCM]	430.17	54.47	1	8	8	20	246	26.2695	6.55127
Q0B4X6	Amino acid/amide ABC transporter substrate-binding protein, HAAT family OS=Burkholderia ambifaria (strain ATCC BAA-244 / AMMD) OX=339670 GN=Bamb_5249 PE=4 SV=1 - [Q0B4X6_BURCM]	426.68	42.3	1	10	10	17	383	40.1477	9.31982
Q0B8C0	Uncharacterized protein OS=Burkholderia ambifaria (strain ATCC BAA-244 / AMMD) OX=339670 GN=Bamb_4050 PE=4 SV=1 - [Q0B8C0_BURCM]	423.47	46.59	1	4	4	14	88	9.94088	8.11865
Q0B9E6	MOSC domain protein beta barrel domain protein OS=Burkholderia ambifaria (strain ATCC BAA-244 / AMMD) OX=339670 GN=Bamb_3673 PE=4 SV=1 - [Q0B9E6_BURCM]	423	60.07	1	10	10	19	288	31.3548	4.85596
Q0BAL3	GatB/Yqey domain protein OS=Burkholderia ambifaria (strain ATCC BAA-244 / AMMD) OX=339670 GN=Bamb_3255 PE=4 SV=1 - [Q0BAL3_BURCM]	420.99	66.89	1	7	7	20	148	15.6052	5.70654
Q0B1W8	S-(hydroxymethyl)glutathione dehydrogenase OS=Burkholderia ambifaria (strain ATCC BAA-244 / AMMD) OX=339670 GN=Bamb_6311 PE=3 SV=1 - [Q0B1W8_BURCM]	420.92	26.83	1	6	6	18	369	38.7967	6.66846
Q0BEF6	ATP-dependent Clp protease proteolytic subunit OS=Burkholderia ambifaria (strain ATCC BAA-244 / AMMD) OX=339670 GN=clpP PE=3 SV=1 - [CLPP_BURCM]	420.6	35.02	1	8	8	18	217	23.7352	5.2876
Q0BIL5	Short chain enoyl-CoA hydratase OS=Burkholderia ambifaria (strain ATCC BAA-244 / AMMD) OX=339670 GN=Bamb_0449 PE=3 SV=1 - [Q0BIL5_BURCM]	419.5	38.76	1	9	9	18	258	27.9402	5.56689
Q0B138	Single-stranded DNA-binding protein OS=Burkholderia ambifaria (strain ATCC BAA-244 / AMMD) OX=339670 GN=Bamb_6592 PE=3 SV=1 - [Q0B138_BURCM]	419.36	44.25	1	4	4	13	113	12.6473	7.40088
Q0BEN9	Hydrolase, TatD family OS=Burkholderia ambifaria (strain ATCC BAA-244 / AMMD) OX=339670 GN=Bamb_1828 PE=4 SV=1 - [Q0BEN9_BURCM]	419.15	40.77	1	8	8	14	260	29.0187	5.93506
Q0BDI3	Bacterioferritin OS=Burkholderia ambifaria (strain ATCC BAA-244 / AMMD) OX=339670 GN=Bamb_2234 PE=3 SV=1 - [Q0BDI3_BURCM]	418.01	65.19	1	8	8	18	158	18.5512	4.85596
Q0BAV6	Uncharacterized protein OS=Burkholderia ambifaria (strain ATCC BAA-244 / AMMD) OX=339670 GN=Bamb_3161 PE=4 SV=1 - [Q0BAV6_BURCM]	417.37	45.52	1	9	9	20	279	31.9695	7.28369
Q0BDX9	Glutamate--tRNA ligase OS=Burkholderia ambifaria (strain ATCC BAA-244 / AMMD) OX=339670 GN=gltX PE=3 SV=1 - [SYE_BURCM]	415.43	36.03	1	12	12	23	469	51.8887	5.84619
Q0BH01	Pyridoxine 5'-phosphate synthase OS=Burkholderia ambifaria (strain ATCC BAA-244 / AMMD) OX=339670 GN=pdxJ PE=3 SV=1 - [Q0BH01_BURCM]	415.34	51.16	1	10	10	15	258	27.8434	6.13818
Q0BDU1	FKBP-type peptidyl-prolyl cis-trans isomerases 2-like protein OS=Burkholderia ambifaria (strain ATCC BAA-244 / AMMD) OX=339670 GN=Bamb_2126 PE=4 SV=1 - [Q0BDU1_BURCM]	414.52	88.33	1	6	6	18	180	19.9534	4.23389
Q0B3F5	Acetyl-CoA acetyltransferase / 3-ketoacyl-CoA thiolase OS=Burkholderia ambifaria (strain ATCC BAA-244 / AMMD) OX=339670 GN=Bamb_5771 PE=3 SV=1 - [Q0B3F5_BURCM]	413.91	56.42	1	13	13	23	397	40.9741	6.85889
Q0BC46	Cytochrome c, class I OS=Burkholderia ambifaria (strain ATCC BAA-244 / AMMD) OX=339670 GN=Bamb_2721 PE=4 SV=1 - [Q0BC46_BURCM]	412.45	28.82	1	4	4	14	229	24.5442	8.25049
Q0BBX5	Amino acid aldolase or racemase-like protein OS=Burkholderia ambifaria (strain ATCC BAA-244 / AMMD) OX=339670 GN=Bamb_2792 PE=4 SV=1 - [Q0BBX5_BURCM]	411.87	41.31	1	11	11	20	426	46.499	5.74463
Q0BCP4	Uncharacterized conserved protein UCP030820 OS=Burkholderia ambifaria (strain ATCC BAA-244 / AMMD) OX=339670 GN=Bamb_2523 PE=4 SV=1 - [Q0BCP4_BURCM]	410.58	38.04	1	7	7	17	184	20.0274	5.2876
Q0BD88	Methylglyoxal synthase OS=Burkholderia ambifaria (strain ATCC BAA-244 / AMMD) OX=339670 GN=mgsA PE=3 SV=1 - [MGSA_BURCM]	410.19	70.77	1	7	7	16	130	13.8402	5.80811
Q0B9T5	Thiamine pyrophosphate enzyme domain protein TPP-binding protein OS=Burkholderia ambifaria (strain ATCC BAA-244 / AMMD) OX=339670 GN=Bamb_3534 PE=4 SV=1 - [Q0B9T5_BURCM]	408.99	20.36	1	6	6	15	393	41.3068	5.85889
Q0BD86	Uracil phosphoribosyltransferase OS=Burkholderia ambifaria (strain ATCC BAA-244 / AMMD) OX=339670 GN=upp PE=3 SV=1 - [UPP_BURCM]	408.2	57.41	1	8	8	21	216	23.9138	7.29834
Q0BJL1	Uroporphyrinogen decarboxylase OS=Burkholderia ambifaria (strain ATCC BAA-244 / AMMD) OX=339670 GN=hemE PE=3 SV=1 - [Q0BJL1_BURCM]	407.91	27.55	1	7	7	15	392	42.3539	6.69775
Q0BAH1	Extracellular solute-binding protein, family 1 OS=Burkholderia ambifaria (strain ATCC BAA-244 / AMMD) OX=339670 GN=Bamb_3297 PE=4 SV=1 - [Q0BAH1_BURCM]	406.38	21.55	1	5	5	13	348	37.8133	8.66064
Q0B9B5	Short-chain dehydrogenase/reductase SDR OS=Burkholderia ambifaria (strain ATCC BAA-244 / AMMD) OX=339670 GN=Bamb_3704 PE=3 SV=1 - [Q0B9B5_BURCM]	403.92	47.73	1	7	7	14	264	27.5462	5.30029
Q0BAN0	AMP nucleosidase OS=Burkholderia ambifaria (strain ATCC BAA-244 / AMMD) OX=339670 GN=amn PE=3 SV=1 - [Q0BAN0_BURCM]	401.22	35.04	1	11	12	18	508	57.6094	7.04932
Q0BCQ9	Uncharacterized protein OS=Burkholderia ambifaria (strain ATCC BAA-244 / AMMD) OX=339670 GN=Bamb_2508 PE=4 SV=1 - [Q0BCQ9_BURCM]	400.83	33.88	1	7	7	12	245	25.441	9.14404
Q0BCL6	L-aspartate oxidase OS=Burkholderia ambifaria (strain ATCC BAA-244 / AMMD) OX=339670 GN=Bamb_2551 PE=3 SV=1 - [Q0BCL6_BURCM]	397.47	30.49	1	10	10	19	528	57.9317	6.75635
Q0BFY3	Translation initiation factor IF-2 OS=Burkholderia ambifaria (strain ATCC BAA-244 / AMMD) OX=339670 GN=infB PE=3 SV=1 - [IF2_BURCM]	396.89	14.73	1	8	8	15	971	104.261	6.43018
Q0BAM3	Carboxymethylenebutenolidase OS=Burkholderia ambifaria (strain ATCC BAA-244 / AMMD) OX=339670 GN=Bamb_3245 PE=4 SV=1 - [Q0BAM3_BURCM]	396.78	31.62	1	7	7	17	291	31.9433	6.69775
Q0B7H8	2-nitropropane dioxygenase, NPD OS=Burkholderia ambifaria (strain ATCC BAA-244 / AMMD) OX=339670 GN=Bamb_4343 PE=4 SV=1 - [Q0B7H8_BURCM]	396.44	41.24	1	8	8	18	354	36.985	6.43018
Q0BHJ8	Transcription antitermination protein NusB OS=Burkholderia ambifaria (strain ATCC BAA-244 / AMMD) OX=339670 GN=nusB PE=3 SV=1 - [NUSB_BURCM]	395.59	52.41	1	5	5	14	145	16.0056	7.57666
Q0BJ46	50S ribosomal protein L3 OS=Burkholderia ambifaria (strain ATCC BAA-244 / AMMD) OX=339670 GN=rplC PE=3 SV=1 - [RL3_BURCM]	394.78	36.87	1	5	5	10	217	22.6842	10.0669
Q0BEP1	Uncharacterized protein OS=Burkholderia ambifaria (strain ATCC BAA-244 / AMMD) OX=339670 GN=Bamb_1826 PE=4 SV=1 - [Q0BEP1_BURCM]	392.71	61.86	1	6	6	11	118	12.2521	8.06006
Q0BBT0	Single-stranded DNA-binding protein OS=Burkholderia ambifaria (strain ATCC BAA-244 / AMMD) OX=339670 GN=Bamb_2837 PE=3 SV=1 - [Q0BBT0_BURCM]	391.26	45.99	1	6	6	11	187	19.0021	5.70654
Q0BHM5	Protein-L-isoaspartate(D-aspartate) O-methyltransferase OS=Burkholderia ambifaria (strain ATCC BAA-244 / AMMD) OX=339670 GN=Bamb_0789 PE=4 SV=1 - [Q0BHM5_BURCM]	388.37	46.79	1	7	7	15	218	24.1397	6.12549
Q0BDD4	NADH dehydrogenase subunit E OS=Burkholderia ambifaria (strain ATCC BAA-244 / AMMD) OX=339670 GN=Bamb_2283 PE=4 SV=1 - [Q0BDD4_BURCM]	387.44	48.45	1	5	5	12	161	17.5746	5.14795
Q0BJ69	Uncharacterized protein OS=Burkholderia ambifaria (strain ATCC BAA-244 / AMMD) OX=339670 GN=Bamb_0244 PE=4 SV=1 - [Q0BJ69_BURCM]	387.24	50.18	1	9	9	17	271	29.4183	7.04932
Q0BGU9	N-succinylarginine dihydrolase OS=Burkholderia ambifaria (strain ATCC BAA-244 / AMMD) OX=339670 GN=astB PE=3 SV=1 - [ASTB_BURCM]	386.52	26.91	1	7	7	13	446	48.3004	5.96045
Q0BIA8	2-keto-3-deoxy-phosphogluconate aldolase OS=Burkholderia ambifaria (strain ATCC BAA-244 / AMMD) OX=339670 GN=Bamb_0556 PE=4 SV=1 - [Q0BIA8_BURCM]	384.61	52.88	1	7	7	14	208	21.8307	7.92822
Q0BD30	Aminotransferase, class I and II OS=Burkholderia ambifaria (strain ATCC BAA-244 / AMMD) OX=339670 GN=Bamb_2387 PE=4 SV=1 - [Q0BD30_BURCM]	382.82	43.77	1	10	10	19	393	43.4928	6.39209
Q0BDH0	Uncharacterized protein probably involved in high-affinity Fe2+ transport OS=Burkholderia ambifaria (strain ATCC BAA-244 / AMMD) OX=339670 GN=Bamb_2247 PE=4 SV=1 - [Q0BDH0_BURCM]	381.3	59.02	1	6	6	19	183	19.7127	6.80029
Q0BCQ2	Probable cytosol aminopeptidase OS=Burkholderia ambifaria (strain ATCC BAA-244 / AMMD) OX=339670 GN=pepA PE=3 SV=1 - [AMPA_BURCM]	379.37	21.67	1	9	9	16	503	53.0895	7.62061
Q0BFZ4	Uncharacterized protein OS=Burkholderia ambifaria (strain ATCC BAA-244 / AMMD) OX=339670 GN=Bamb_1371 PE=4 SV=1 - [Q0BFZ4_BURCM]	377.57	35.56	1	2	2	13	90	9.51597	9.36377
Q0BG44	Valine--tRNA ligase OS=Burkholderia ambifaria (strain ATCC BAA-244 / AMMD) OX=339670 GN=valS PE=3 SV=1 - [Q0BG44_BURCM]	375.52	20.84	1	15	15	19	955	106.608	5.66846
Q0BBR8	Lipopolysaccharide export system protein LptA OS=Burkholderia ambifaria (strain ATCC BAA-244 / AMMD) OX=339670 GN=lptA PE=3 SV=1 - [Q0BBR8_BURCM]	374.32	49.77	1	7	7	14	221	23.288	8.79248
Q0BJ01	3-dehydroquinate synthase OS=Burkholderia ambifaria (strain ATCC BAA-244 / AMMD) OX=339670 GN=aroB PE=3 SV=1 - [AROB_BURCM]	374.27	43.73	1	9	9	17	359	37.8868	6.01123
Q0BH77	Lipoprotein, YaeC family OS=Burkholderia ambifaria (strain ATCC BAA-244 / AMMD) OX=339670 GN=Bamb_0937 PE=4 SV=1 - [Q0BH77_BURCM]	373.45	60.23	1	8	10	17	264	28.2752	9.48096
Q0BC93	Pyruvate kinase OS=Burkholderia ambifaria (strain ATCC BAA-244 / AMMD) OX=339670 GN=Bamb_2674 PE=3 SV=1 - [Q0BC93_BURCM]	372.08	39.75	1	11	11	20	478	51.3246	5.87158
Q0BG05	Translation initiation factor IF-3 OS=Burkholderia ambifaria (strain ATCC BAA-244 / AMMD) OX=339670 GN=infC PE=3 SV=1 - [Q0BG05_BURCM]	372.05	51.92	1	7	7	14	156	18.2017	9.36377
Q0BD29	Endoribonuclease L-PSP OS=Burkholderia ambifaria (strain ATCC BAA-244 / AMMD) OX=339670 GN=Bamb_2388 PE=4 SV=1 - [Q0BD29_BURCM]	371.46	64.47	1	4	4	14	152	15.7733	6.3667
Q0B5N8	FAD-binding 9, siderophore-interacting domain protein OS=Burkholderia ambifaria (strain ATCC BAA-244 / AMMD) OX=339670 GN=Bamb_4986 PE=4 SV=1 - [Q0B5N8_BURCM]	370.89	41.03	1	7	7	13	273	29.9265	6.69775
Q0BDC7	Alcohol dehydrogenase, zinc-binding domain protein OS=Burkholderia ambifaria (strain ATCC BAA-244 / AMMD) OX=339670 GN=Bamb_2290 PE=4 SV=1 - [Q0BDC7_BURCM]	369.56	50.15	1	10	10	20	339	35.6609	5.78271
Q0BJ47	30S ribosomal protein S10 OS=Burkholderia ambifaria (strain ATCC BAA-244 / AMMD) OX=339670 GN=rpsJ PE=3 SV=1 - [RS10_BURCM]	366.72	42.72	1	4	4	9	103	11.8205	9.77393
Q0BDN5	Exodeoxyribonuclease III OS=Burkholderia ambifaria (strain ATCC BAA-244 / AMMD) OX=339670 GN=Bamb_2182 PE=4 SV=1 - [Q0BDN5_BURCM]	366.01	31.73	1	7	7	14	271	31.0547	6.17627
Q0BH15	3-oxoacyl-[acyl-carrier-protein] reductase OS=Burkholderia ambifaria (strain ATCC BAA-244 / AMMD) OX=339670 GN=Bamb_0999 PE=4 SV=1 - [Q0BH15_BURCM]	365.72	44.18	1	7	7	15	249	25.6714	8.68994
Q0BJ50	30S ribosomal protein S7 OS=Burkholderia ambifaria (strain ATCC BAA-244 / AMMD) OX=339670 GN=rpsG PE=3 SV=1 - [RS7_BURCM]	364.54	41.67	1	6	6	13	156	17.6584	10.6675
Q0BE06	Succinyldiaminopimelate aminotransferase apoenzyme OS=Burkholderia ambifaria (strain ATCC BAA-244 / AMMD) OX=339670 GN=Bamb_2061 PE=4 SV=1 - [Q0BE06_BURCM]	364.17	42.64	1	12	12	17	387	41.7783	6.18896
Q0B3J9	Aldose 1-epimerase OS=Burkholderia ambifaria (strain ATCC BAA-244 / AMMD) OX=339670 GN=Bamb_5727 PE=3 SV=1 - [Q0B3J9_BURCM]	363.01	31.79	1	6	6	10	390	41.7221	6.96143
Q0B9B9	ThiJ/PfpI domain protein OS=Burkholderia ambifaria (strain ATCC BAA-244 / AMMD) OX=339670 GN=Bamb_3700 PE=4 SV=1 - [Q0B9B9_BURCM]	362.43	51.75	1	8	8	15	228	24.1534	5.12256
Q0B847	Putative signal-transduction protein with CBS domains OS=Burkholderia ambifaria (strain ATCC BAA-244 / AMMD) OX=339670 GN=Bamb_4123 PE=4 SV=1 - [Q0B847_BURCM]	362.21	49.02	1	6	6	13	153	16.8138	6.53662
Q0BIX1	ATP phosphoribosyltransferase OS=Burkholderia ambifaria (strain ATCC BAA-244 / AMMD) OX=339670 GN=hisG PE=3 SV=1 - [HIS1_BURCM]	359.33	54.84	1	7	7	13	217	23.0914	6.80029
Q0BG26	Putative transcriptional regulator, XRE family OS=Burkholderia ambifaria (strain ATCC BAA-244 / AMMD) OX=339670 GN=Bamb_1339 PE=4 SV=1 - [Q0BG26_BURCM]	358.3	47.02	1	5	5	14	151	17.1848	5.87158
Q0BCT4	OmpA/MotB domain protein OS=Burkholderia ambifaria (strain ATCC BAA-244 / AMMD) OX=339670 GN=Bamb_2483 PE=3 SV=1 - [Q0BCT4_BURCM]	357.95	33.19	1	4	4	12	232	23.509	9.42236
Q0BGK1	Hydroxyacylglutathione hydrolase OS=Burkholderia ambifaria (strain ATCC BAA-244 / AMMD) OX=339670 GN=gloB PE=3 SV=1 - [Q0BGK1_BURCM]	357.44	36.54	1	6	6	13	260	27.817	6.12549
Q0BJ25	Translation initiation factor IF-1 1 OS=Burkholderia ambifaria (strain ATCC BAA-244 / AMMD) OX=339670 GN=infA1 PE=3 SV=1 - [IF11_BURCM]	354.66	69.44	1	5	5	13	72	8.2124	9.59814
Q0B615	Uncharacterized protein OS=Burkholderia ambifaria (strain ATCC BAA-244 / AMMD) OX=339670 GN=Bamb_4859 PE=4 SV=1 - [Q0B615_BURCM]	354.5	68.54	1	4	4	11	89	9.58592	6.15088
Q0BHH8	Outer-membrane lipoprotein carrier protein OS=Burkholderia ambifaria (strain ATCC BAA-244 / AMMD) OX=339670 GN=lolA PE=3 SV=1 - [Q0BHH8_BURCM]	353.13	26.64	1	5	5	14	229	24.8708	9.5542
Q0BCY5	Proteinase inhibitor I11, ecotin OS=Burkholderia ambifaria (strain ATCC BAA-244 / AMMD) OX=339670 GN=Bamb_2432 PE=4 SV=1 - [Q0BCY5_BURCM]	351.89	51.2	1	6	6	15	166	18.0321	8.1626
Q0BEV8	Peptidase M23B OS=Burkholderia ambifaria (strain ATCC BAA-244 / AMMD) OX=339670 GN=Bamb_1759 PE=4 SV=1 - [Q0BEV8_BURCM]	351.85	32.2	1	7	8	15	295	30.3536	9.34912
Q0BEP9	Peptidoglycan-binding LysM OS=Burkholderia ambifaria (strain ATCC BAA-244 / AMMD) OX=339670 GN=Bamb_1818 PE=4 SV=1 - [Q0BEP9_BURCM]	350.98	54.49	1	5	5	13	156	16.3482	4.729
Q0BBK5	2,3-bisphosphoglycerate-dependent phosphoglycerate mutase OS=Burkholderia ambifaria (strain ATCC BAA-244 / AMMD) OX=339670 GN=gpmA PE=3 SV=1 - [GPMA_BURCM]	349.99	45.16	1	9	9	22	248	27.9385	6.55127
Q0B902	UspA domain protein OS=Burkholderia ambifaria (strain ATCC BAA-244 / AMMD) OX=339670 GN=Bamb_3817 PE=4 SV=1 - [Q0B902_BURCM]	349.27	37.28	1	8	8	14	279	30.5864	6.53662
Q0BEV9	RNA polymerase sigma factor RpoS OS=Burkholderia ambifaria (strain ATCC BAA-244 / AMMD) OX=339670 GN=rpoS PE=3 SV=1 - [Q0BEV9_BURCM]	346.56	29.09	1	8	8	13	361	40.828	5.36377
Q0BEZ6	PfkB domain protein OS=Burkholderia ambifaria (strain ATCC BAA-244 / AMMD) OX=339670 GN=Bamb_1721 PE=4 SV=1 - [Q0BEZ6_BURCM]	342.92	50.32	1	8	8	16	308	32.2141	5.46533
Q0BIM7	Anthranilate phosphoribosyltransferase OS=Burkholderia ambifaria (strain ATCC BAA-244 / AMMD) OX=339670 GN=trpD PE=3 SV=1 - [TRPD_BURCM]	342.72	27.41	1	6	6	13	343	36.7959	6.40479
Q0BD85	Probable transcriptional regulatory protein Bamb_2332 OS=Burkholderia ambifaria (strain ATCC BAA-244 / AMMD) OX=339670 GN=Bamb_2332 PE=3 SV=1 - [Y2332_BURCM]	342.37	32.23	1	5	5	13	242	25.9649	4.89404
Q0BHS5	Phosphoribosyltransferase OS=Burkholderia ambifaria (strain ATCC BAA-244 / AMMD) OX=339670 GN=Bamb_0739 PE=4 SV=1 - [Q0BHS5_BURCM]	340.59	53.22	1	7	7	13	171	18.0695	5.36377
Q0B3K3	Alpha/beta hydrolase fold protein OS=Burkholderia ambifaria (strain ATCC BAA-244 / AMMD) OX=339670 GN=Bamb_5723 PE=4 SV=1 - [Q0B3K3_BURCM]	340.08	23.02	1	4	4	10	278	30.3984	6.46826
Q0B593	Cupin 2, conserved barrel domain protein OS=Burkholderia ambifaria (strain ATCC BAA-244 / AMMD) OX=339670 GN=Bamb_5131 PE=4 SV=1 - [Q0B593_BURCM]	339.94	61.29	1	6	6	13	155	17.1198	6.18896
Q0BFY5	Ribosome maturation factor RimP OS=Burkholderia ambifaria (strain ATCC BAA-244 / AMMD) OX=339670 GN=rimP PE=3 SV=1 - [RIMP_BURCM]	334.07	39.47	1	4	4	11	152	17.0589	5.2749
Q0B7B3	Uncharacterized protein OS=Burkholderia ambifaria (strain ATCC BAA-244 / AMMD) OX=339670 GN=Bamb_4408 PE=4 SV=1 - [Q0B7B3_BURCM]	332.69	63.51	1	5	5	13	148	15.6649	8.03076
Q0B115	Conjugal transfer protein OS=Burkholderia ambifaria (strain ATCC BAA-244 / AMMD) OX=339670 GN=Bamb_6615 PE=4 SV=1 - [Q0B115_BURCM]	332.29	51.16	1	4	4	12	129	13.5924	4.03076
Q0B9W3	Amino acid/amide ABC transporter substrate-binding protein, HAAT family OS=Burkholderia ambifaria (strain ATCC BAA-244 / AMMD) OX=339670 GN=Bamb_3506 PE=4 SV=1 - [Q0B9W3_BURCM]	331.15	40.98	1	8	9	14	388	40.3051	9.48096
Q0BF68	Uncharacterized protein OS=Burkholderia ambifaria (strain ATCC BAA-244 / AMMD) OX=339670 GN=Bamb_1648 PE=4 SV=1 - [Q0BF68_BURCM]	329.94	32.17	1	3	3	8	143	15.6799	6.32861
Q0BEQ6	30S ribosomal protein S6 OS=Burkholderia ambifaria (strain ATCC BAA-244 / AMMD) OX=339670 GN=rpsF PE=3 SV=1 - [RS6_BURCM]	329.73	51.61	1	4	4	10	124	14.3252	7.18115
Q0B5P1	Probable acetoacetate decarboxylase OS=Burkholderia ambifaria (strain ATCC BAA-244 / AMMD) OX=339670 GN=adc PE=3 SV=1 - [ADC_BURCM]	329.65	48.78	1	8	8	18	246	27.3951	5.78271
Q0BJ45	50S ribosomal protein L4 OS=Burkholderia ambifaria (strain ATCC BAA-244 / AMMD) OX=339670 GN=rplD PE=3 SV=1 - [RL4_BURCM]	328.5	28.64	1	5	5	11	206	22.9802	9.51025
Q0BH39	Ferredoxin OS=Burkholderia ambifaria (strain ATCC BAA-244 / AMMD) OX=339670 GN=Bamb_0975 PE=4 SV=1 - [Q0BH39_BURCM]	326.92	44.86	1	5	5	16	107	11.9395	4.41162
Q0BD83	Oxygen-dependent coproporphyrinogen-III oxidase OS=Burkholderia ambifaria (strain ATCC BAA-244 / AMMD) OX=339670 GN=hemF PE=3 SV=1 - [HEM6_BURCM]	326.75	27.12	1	6	6	11	306	34.4391	5.74463
Q0BJQ3	Putative glutamate--cysteine ligase 2 OS=Burkholderia ambifaria (strain ATCC BAA-244 / AMMD) OX=339670 GN=Bamb_0059 PE=3 SV=1 - [GCS2_BURCM]	325.22	27.22	1	8	8	12	371	41.7409	5.65576
Q0BCF3	Thioredoxin OS=Burkholderia ambifaria (strain ATCC BAA-244 / AMMD) OX=339670 GN=Bamb_2614 PE=4 SV=1 - [Q0BCF3_BURCM]	325.22	43.62	1	8	8	12	282	31.261	4.7417
Q0BFX4	Dihydrolipoyllysine-residue succinyltransferase component of 2-oxoglutarate dehydrogenase complex OS=Burkholderia ambifaria (strain ATCC BAA-244 / AMMD) OX=339670 GN=Bamb_1391 PE=3 SV=1 - [Q0BFX4_BURCM]	325.15	23.53	1	6	6	13	425	44.2865	5.99854
Q0BJ20	DNA-directed RNA polymerase subunit alpha OS=Burkholderia ambifaria (strain ATCC BAA-244 / AMMD) OX=339670 GN=rpoA PE=3 SV=1 - [RPOA_BURCM]	324.86	28.92	1	7	7	13	325	35.675	6.07471
Q0B7E8	Ribonuclease T2 OS=Burkholderia ambifaria (strain ATCC BAA-244 / AMMD) OX=339670 GN=Bamb_4373 PE=3 SV=1 - [Q0B7E8_BURCM]	321.87	22.63	1	3	3	6	243	25.9033	6.75635
Q0BJL4	ATP synthase epsilon chain OS=Burkholderia ambifaria (strain ATCC BAA-244 / AMMD) OX=339670 GN=atpC PE=3 SV=1 - [ATPE_BURCM]	319.93	46.81	1	5	5	10	141	14.976	5.18604
Q0B820	NADH:flavin oxidoreductase/NADH oxidase OS=Burkholderia ambifaria (strain ATCC BAA-244 / AMMD) OX=339670 GN=Bamb_4150 PE=4 SV=1 - [Q0B820_BURCM]	319.6	17.85	1	6	6	11	353	37.8273	5.5542
Q0BI90	30S ribosomal protein S9 OS=Burkholderia ambifaria (strain ATCC BAA-244 / AMMD) OX=339670 GN=rpsI PE=3 SV=1 - [RS9_BURCM]	318.59	55.38	1	5	5	10	130	14.3087	10.814
Q0BAZ0	Phytanoyl-CoA dioxygenase OS=Burkholderia ambifaria (strain ATCC BAA-244 / AMMD) OX=339670 GN=Bamb_3127 PE=4 SV=1 - [Q0BAZ0_BURCM]	317.12	39.69	1	8	8	12	257	28.7352	6.68311
Q0BJ27	50S ribosomal protein L15 OS=Burkholderia ambifaria (strain ATCC BAA-244 / AMMD) OX=339670 GN=rplO PE=3 SV=1 - [RL15_BURCM]	316.56	48.61	1	7	7	18	144	15.0564	10.5942
Q0B9X9	Alanine racemase OS=Burkholderia ambifaria (strain ATCC BAA-244 / AMMD) OX=339670 GN=Bamb_3490 PE=3 SV=1 - [Q0B9X9_BURCM]	316.01	30.56	1	6	7	14	373	40.2927	6.75635
Q0BEW2	23S rRNA (uracil(1939)-C(5))-methyltransferase RlmD OS=Burkholderia ambifaria (strain ATCC BAA-244 / AMMD) OX=339670 GN=rlmD PE=3 SV=2 - [RLMD_BURCM]	314.34	24.09	1	7	7	13	465	50.9696	8.33838
Q0BEV0	Transcription termination factor Rho OS=Burkholderia ambifaria (strain ATCC BAA-244 / AMMD) OX=339670 GN=rho PE=3 SV=1 - [Q0BEV0_BURCM]	310.54	34.76	1	10	10	18	420	47.3419	6.99072
Q0BJA7	Cytochrome c, class I OS=Burkholderia ambifaria (strain ATCC BAA-244 / AMMD) OX=339670 GN=Bamb_0205 PE=4 SV=1 - [Q0BJA7_BURCM]	309.3	45.38	1	5	5	14	119	12.4425	9.92041
Q0BJ44	50S ribosomal protein L23 OS=Burkholderia ambifaria (strain ATCC BAA-244 / AMMD) OX=339670 GN=rplW PE=3 SV=1 - [RL23_BURCM]	308.67	62.5	1	5	5	11	104	11.7323	9.42236
Q0BBC5	Sulfate ABC transporter, periplasmic sulfate-binding protein OS=Burkholderia ambifaria (strain ATCC BAA-244 / AMMD) OX=339670 GN=Bamb_2992 PE=4 SV=1 - [Q0BBC5_BURCM]	308.59	22.71	1	7	7	13	339	36.736	9.12939
Q0B442	Uncharacterized protein OS=Burkholderia ambifaria (strain ATCC BAA-244 / AMMD) OX=339670 GN=Bamb_5534 PE=4 SV=1 - [Q0B442_BURCM]	308.5	24.23	1	2	3	9	194	19.5432	9.70068
Q0B845	GreA/GreB family elongation factor OS=Burkholderia ambifaria (strain ATCC BAA-244 / AMMD) OX=339670 GN=Bamb_4125 PE=4 SV=1 - [Q0B845_BURCM]	308.49	46.97	1	5	5	11	132	14.6947	5.50342
Q0BGG2	Aldose 1-epimerase OS=Burkholderia ambifaria (strain ATCC BAA-244 / AMMD) OX=339670 GN=Bamb_1203 PE=4 SV=1 - [Q0BGG2_BURCM]	308.24	52.19	1	11	11	16	320	35.608	6.58057
Q0BIV1	Glutathione S-transferase, N-terminal domain protein OS=Burkholderia ambifaria (strain ATCC BAA-244 / AMMD) OX=339670 GN=Bamb_0362 PE=4 SV=1 - [Q0BIV1_BURCM]	307.68	46.8	1	7	7	21	203	23.6943	6.93213
Q0BAB8	Tryptophan synthase alpha chain OS=Burkholderia ambifaria (strain ATCC BAA-244 / AMMD) OX=339670 GN=trpA PE=3 SV=1 - [Q0BAB8_BURCM]	306.47	31.62	1	6	6	13	272	28.2078	5.05908
Q0BCB6	S-formylglutathione hydrolase OS=Burkholderia ambifaria (strain ATCC BAA-244 / AMMD) OX=339670 GN=Bamb_2651 PE=3 SV=1 - [Q0BCB6_BURCM]	305.14	34.4	1	7	7	14	282	30.5011	6.56592
Q0BCV4	Aldehyde dehydrogenase (NAD(+)) OS=Burkholderia ambifaria (strain ATCC BAA-244 / AMMD) OX=339670 GN=Bamb_2463 PE=3 SV=1 - [Q0BCV4_BURCM]	302.94	22.34	1	7	7	15	479	50.3839	6.13818
Q0BHU6	Transport-associated protein OS=Burkholderia ambifaria (strain ATCC BAA-244 / AMMD) OX=339670 GN=Bamb_0718 PE=4 SV=1 - [Q0BHU6_BURCM]	302.31	34.71	1	4	4	12	121	12.0305	9.87646
Q0BCS8	Pantothenate synthetase OS=Burkholderia ambifaria (strain ATCC BAA-244 / AMMD) OX=339670 GN=panC PE=3 SV=1 - [PANC_BURCM]	301.91	28.32	1	5	5	10	279	31.3444	6.27783
Q0BEG7	Peptidylprolyl isomerase OS=Burkholderia ambifaria (strain ATCC BAA-244 / AMMD) OX=339670 GN=Bamb_1900 PE=4 SV=1 - [Q0BEG7_BURCM]	301.87	31.92	1	7	7	13	260	28.6591	8.96826
Q0BDP4	Acetyltransferase component of pyruvate dehydrogenase complex OS=Burkholderia ambifaria (strain ATCC BAA-244 / AMMD) OX=339670 GN=Bamb_2173 PE=3 SV=1 - [Q0BDP4_BURCM]	301.71	39.02	1	11	11	19	551	56.4389	6.37939
Q0BFP1	Uncharacterized protein OS=Burkholderia ambifaria (strain ATCC BAA-244 / AMMD) OX=339670 GN=Bamb_1474 PE=4 SV=1 - [Q0BFP1_BURCM]	300.26	44.53	1	7	7	15	247	27.7072	4.53857
Q0BCJ2	Uncharacterized protein OS=Burkholderia ambifaria (strain ATCC BAA-244 / AMMD) OX=339670 GN=Bamb_2575 PE=4 SV=1 - [Q0BCJ2_BURCM]	299.68	28.92	1	4	4	9	166	18.1542	8.86572
Q0B8M4	Fumarylacetoacetate (FAA) hydrolase OS=Burkholderia ambifaria (strain ATCC BAA-244 / AMMD) OX=339670 GN=Bamb_3945 PE=4 SV=1 - [Q0B8M4_BURCM]	299.27	40.95	1	5	5	11	232	24.7695	5.46533
Q0B7I0	Malate/L-lactate dehydrogenase OS=Burkholderia ambifaria (strain ATCC BAA-244 / AMMD) OX=339670 GN=Bamb_4341 PE=3 SV=1 - [Q0B7I0_BURCM]	299.15	23.04	1	7	7	11	369	39.1276	6.22705
Q0BIG4	Uncharacterized protein OS=Burkholderia ambifaria (strain ATCC BAA-244 / AMMD) OX=339670 GN=Bamb_0500 PE=4 SV=1 - [Q0BIG4_BURCM]	299.02	16.36	1	2	2	9	220	21.3673	12.0884
Q0BD19	Uncharacterized protein OS=Burkholderia ambifaria (strain ATCC BAA-244 / AMMD) OX=339670 GN=Bamb_2398 PE=4 SV=1 - [Q0BD19_BURCM]	298.46	23.97	1	3	3	10	146	15.6001	7.25439
Q0BCJ9	Cold-shock DNA-binding protein family OS=Burkholderia ambifaria (strain ATCC BAA-244 / AMMD) OX=339670 GN=Bamb_2568 PE=4 SV=1 - [Q0BCJ9_BURCM]	297.27	55.22	1	2	2	13	67	7.21662	7.23975
Q0BJN2	Amino acid/amide ABC transporter substrate-binding protein, HAAT family OS=Burkholderia ambifaria (strain ATCC BAA-244 / AMMD) OX=339670 GN=Bamb_0080 PE=4 SV=1 - [Q0BJN2_BURCM]	296.95	48.31	1	10	10	14	385	40.632	8.6167
Q0BEX2	RNA-binding protein Hfq OS=Burkholderia ambifaria (strain ATCC BAA-244 / AMMD) OX=339670 GN=hfq PE=3 SV=1 - [HFQ_BURCM]	296.3	35	1	3	3	10	80	8.95871	8.55811
Q0BDB5	Acetolactate synthase, small subunit OS=Burkholderia ambifaria (strain ATCC BAA-244 / AMMD) OX=339670 GN=Bamb_2302 PE=4 SV=1 - [Q0BDB5_BURCM]	294.07	39.26	1	4	4	10	163	18.0187	5.96045
Q0BED1	Phage shock protein A, PspA OS=Burkholderia ambifaria (strain ATCC BAA-244 / AMMD) OX=339670 GN=Bamb_1936 PE=4 SV=1 - [Q0BED1_BURCM]	293.23	27.88	1	5	5	8	226	24.3176	5.35107
Q0BAI0	Peptidase M23B OS=Burkholderia ambifaria (strain ATCC BAA-244 / AMMD) OX=339670 GN=Bamb_3288 PE=4 SV=1 - [Q0BAI0_BURCM]	291.88	37.45	1	8	8	17	243	25.1288	9.48096
Q0BEC7	2-hydroxy-3-oxopropionate reductase OS=Burkholderia ambifaria (strain ATCC BAA-244 / AMMD) OX=339670 GN=Bamb_1940 PE=4 SV=1 - [Q0BEC7_BURCM]	291.11	31.31	1	5	5	9	297	30.0484	6.30322
Q0BB84	Uncharacterized protein OS=Burkholderia ambifaria (strain ATCC BAA-244 / AMMD) OX=339670 GN=Bamb_3033 PE=4 SV=1 - [Q0BB84_BURCM]	290.94	51.39	1	3	3	6	72	8.13594	4.70361
Q0BJA9	Phosphoheptose isomerase OS=Burkholderia ambifaria (strain ATCC BAA-244 / AMMD) OX=339670 GN=Bamb_0203 PE=4 SV=1 - [Q0BJA9_BURCM]	290.71	50	1	4	4	8	194	19.67	4.86865
Q0BIW4	Imidazole glycerol phosphate synthase subunit HisF OS=Burkholderia ambifaria (strain ATCC BAA-244 / AMMD) OX=339670 GN=hisF PE=3 SV=1 - [HIS6_BURCM]	290.41	26.46	1	6	6	12	257	27.2601	5.40186
Q0BHH5	Serine--tRNA ligase OS=Burkholderia ambifaria (strain ATCC BAA-244 / AMMD) OX=339670 GN=serS PE=3 SV=1 - [SYS_BURCM]	290.07	23.09	1	7	7	13	433	47.406	5.88428
Q0B5R4	NADPH-dependent FMN reductase OS=Burkholderia ambifaria (strain ATCC BAA-244 / AMMD) OX=339670 GN=Bamb_4960 PE=4 SV=1 - [Q0B5R4_BURCM]	289.78	53.26	1	7	7	13	184	20.3635	6.96143
Q0B4Y1	Transport-associated protein OS=Burkholderia ambifaria (strain ATCC BAA-244 / AMMD) OX=339670 GN=Bamb_5244 PE=4 SV=1 - [Q0B4Y1_BURCM]	288.65	38.79	1	4	4	9	116	12.0166	9.77393
Q0BCK5	Deoxyuridine 5'-triphosphate nucleotidohydrolase OS=Burkholderia ambifaria (strain ATCC BAA-244 / AMMD) OX=339670 GN=dut PE=3 SV=1 - [DUT_BURCM]	288.56	43.24	1	4	4	8	148	15.9062	5.77002
Q0BHW3	Homogentisate 1,2-dioxygenase OS=Burkholderia ambifaria (strain ATCC BAA-244 / AMMD) OX=339670 GN=hmgA PE=3 SV=1 - [HGD_BURCM]	288.06	20.27	1	6	6	8	444	49.0013	5.77002
Q0BDC4	Amino acid/amide ABC transporter substrate-binding protein, HAAT family OS=Burkholderia ambifaria (strain ATCC BAA-244 / AMMD) OX=339670 GN=Bamb_2293 PE=4 SV=1 - [Q0BDC4_BURCM]	285.94	25.3	1	6	6	9	419	44.8526	8.54346
Q0BAT6	Methionyl-tRNA formyltransferase OS=Burkholderia ambifaria (strain ATCC BAA-244 / AMMD) OX=339670 GN=fmt PE=3 SV=1 - [FMT_BURCM]	284.82	26.91	1	7	7	10	327	34.058	6.55127
Q0BAV7	Exodeoxyribonuclease III Xth OS=Burkholderia ambifaria (strain ATCC BAA-244 / AMMD) OX=339670 GN=Bamb_3160 PE=4 SV=1 - [Q0BAV7_BURCM]	283.01	53.31	1	11	11	19	257	29.2915	6.65381
Q0BGV2	Arginine succinyltransferase OS=Burkholderia ambifaria (strain ATCC BAA-244 / AMMD) OX=339670 GN=Bamb_1062 PE=4 SV=1 - [Q0BGV2_BURCM]	281.95	35.69	1	8	8	12	353	38.5375	5.47803
Q0B2X4	Alpha/beta hydrolase fold-3 domain protein OS=Burkholderia ambifaria (strain ATCC BAA-244 / AMMD) OX=339670 GN=Bamb_5954 PE=4 SV=1 - [Q0B2X4_BURCM]	281.3	30.23	1	7	7	13	344	36.4649	8.27979
Q0BIB8	4-hydroxy-tetrahydrodipicolinate reductase OS=Burkholderia ambifaria (strain ATCC BAA-244 / AMMD) OX=339670 GN=dapB PE=3 SV=1 - [DAPB_BURCM]	280.41	23.02	1	4	4	9	265	27.8564	6.27783
Q0BBX9	NADPH-dependent 7-cyano-7-deazaguanine reductase OS=Burkholderia ambifaria (strain ATCC BAA-244 / AMMD) OX=339670 GN=queF PE=3 SV=1 - [QUEF_BURCM]	280.25	41.97	1	8	8	13	274	30.3963	5.63037
Q0BBG0	Uncharacterized protein OS=Burkholderia ambifaria (strain ATCC BAA-244 / AMMD) OX=339670 GN=Bamb_2957 PE=4 SV=1 - [Q0BBG0_BURCM]	279.02	21.92	2	5	5	12	292	34.3511	6.20166
Q0B7F9	Uncharacterized protein OS=Burkholderia ambifaria (strain ATCC BAA-244 / AMMD) OX=339670 GN=Bamb_4362 PE=4 SV=1 - [Q0B7F9_BURCM]	278.01	54.22	1	4	4	19	83	8.95852	5.021
Q0BHD7	Fructose-1,6-bisphosphatase class 1 OS=Burkholderia ambifaria (strain ATCC BAA-244 / AMMD) OX=339670 GN=fbp PE=3 SV=1 - [F16PA_BURCM]	277.91	38.64	1	11	11	19	339	37.2597	5.23682
Q0BIH9	50S ribosomal protein L27 OS=Burkholderia ambifaria (strain ATCC BAA-244 / AMMD) OX=339670 GN=rpmA PE=3 SV=1 - [RL27_BURCM]	277.89	56.32	1	4	4	13	87	9.08385	10.5503
Q0BJL7	ATP synthase subunit alpha OS=Burkholderia ambifaria (strain ATCC BAA-244 / AMMD) OX=339670 GN=atpA PE=3 SV=1 - [ATPA_BURCM]	277.31	25.15	1	9	9	15	513	55.7192	5.65576
Q0BCE8	Peptide methionine sulfoxide reductase MsrA OS=Burkholderia ambifaria (strain ATCC BAA-244 / AMMD) OX=339670 GN=msrA PE=3 SV=1 - [Q0BCE8_BURCM]	274.66	55.38	1	6	6	13	186	20.9082	5.37646
Q0B8Z4	Alcohol dehydrogenase, zinc-binding domain protein OS=Burkholderia ambifaria (strain ATCC BAA-244 / AMMD) OX=339670 GN=Bamb_3825 PE=4 SV=1 - [Q0B8Z4_BURCM]	271.37	37.78	1	8	8	14	352	37.2072	6.43018
Q0BG51	SirA family protein OS=Burkholderia ambifaria (strain ATCC BAA-244 / AMMD) OX=339670 GN=Bamb_1314 PE=3 SV=1 - [Q0BG51_BURCM]	271.21	80	1	6	6	11	75	8.41044	9.37842
Q0B8F8	Extracellular solute-binding protein, family 5 OS=Burkholderia ambifaria (strain ATCC BAA-244 / AMMD) OX=339670 GN=Bamb_4012 PE=4 SV=1 - [Q0B8F8_BURCM]	271.07	31	1	10	10	14	529	58.2414	9.0415
Q0BHX1	Peroxidase OS=Burkholderia ambifaria (strain ATCC BAA-244 / AMMD) OX=339670 GN=Bamb_0693 PE=4 SV=1 - [Q0BHX1_BURCM]	270.79	32.08	1	4	4	6	212	23.9274	5.92236
Q0BE24	Outer membrane chaperone Skp (OmpH) OS=Burkholderia ambifaria (strain ATCC BAA-244 / AMMD) OX=339670 GN=Bamb_2043 PE=3 SV=1 - [Q0BE24_BURCM]	269.68	22.29	1	5	5	11	175	19.3702	9.20264
Q0BBP4	Uncharacterized protein OS=Burkholderia ambifaria (strain ATCC BAA-244 / AMMD) OX=339670 GN=Bamb_2873 PE=4 SV=1 - [Q0BBP4_BURCM]	269.02	46.46	1	4	4	6	127	14.3233	6.93213
Q0B125	Putative conjugation protein TraO OS=Burkholderia ambifaria (strain ATCC BAA-244 / AMMD) OX=339670 GN=Bamb_6605 PE=4 SV=1 - [Q0B125_BURCM]	267.77	53.91	1	5	5	13	115	12.4775	9.77393
Q0BDV4	Cysteine--tRNA ligase OS=Burkholderia ambifaria (strain ATCC BAA-244 / AMMD) OX=339670 GN=cysS PE=3 SV=1 - [SYC_BURCM]	267.51	25.81	1	8	8	16	465	52.0422	5.97314
Q0BAM1	Rieske (2Fe-2S) domain protein OS=Burkholderia ambifaria (strain ATCC BAA-244 / AMMD) OX=339670 GN=Bamb_3247 PE=4 SV=1 - [Q0BAM1_BURCM]	264.02	26.36	1	7	7	12	368	42.5039	5.60498
Q0B900	3-oxoacyl-[acyl-carrier-protein] reductase OS=Burkholderia ambifaria (strain ATCC BAA-244 / AMMD) OX=339670 GN=Bamb_3819 PE=4 SV=1 - [Q0B900_BURCM]	262.15	43.95	1	6	6	12	248	26.088	6.3667
Q0B206	Amino acid ABC transporter substrate-binding protein, PAAT family OS=Burkholderia ambifaria (strain ATCC BAA-244 / AMMD) OX=339670 GN=Bamb_6273 PE=4 SV=1 - [Q0B206_BURCM]	262.05	31.56	1	5	5	8	244	26.0837	5.22412
Q0BIW8	Imidazoleglycerol-phosphate dehydratase OS=Burkholderia ambifaria (strain ATCC BAA-244 / AMMD) OX=339670 GN=hisB PE=3 SV=1 - [HIS7_BURCM]	261.85	44.1	1	7	7	15	195	21.4873	6.80029
Q0BG24	Chorismate synthase OS=Burkholderia ambifaria (strain ATCC BAA-244 / AMMD) OX=339670 GN=aroC PE=3 SV=1 - [AROC_BURCM]	261.85	25.68	1	6	6	16	366	38.9577	5.98584
Q0BIQ2	Glutaredoxin OS=Burkholderia ambifaria (strain ATCC BAA-244 / AMMD) OX=339670 GN=Bamb_0412 PE=3 SV=1 - [Q0BIQ2_BURCM]	261.84	57.28	1	5	5	12	103	11.6047	4.76709
Q0B7P5	Cell wall hydrolase/autolysin OS=Burkholderia ambifaria (strain ATCC BAA-244 / AMMD) OX=339670 GN=Bamb_4275 PE=4 SV=1 - [Q0B7P5_BURCM]	261.66	32.81	1	6	6	16	253	27.4374	8.99756
Q0BIW2	Phosphoribosyl-ATP pyrophosphatase OS=Burkholderia ambifaria (strain ATCC BAA-244 / AMMD) OX=339670 GN=hisE PE=3 SV=1 - [HIS2_BURCM]	261.63	36.36	1	5	5	9	121	13.2658	5.19873
Q0BEH9	HvnB halovibrin OS=Burkholderia ambifaria (strain ATCC BAA-244 / AMMD) OX=339670 GN=Bamb_1888 PE=4 SV=1 - [Q0BEH9_BURCM]	261.14	22.33	1	4	4	7	309	33.9593	5.43994
Q0BCE3	Transcriptional regulator, AsnC family OS=Burkholderia ambifaria (strain ATCC BAA-244 / AMMD) OX=339670 GN=Bamb_2624 PE=4 SV=1 - [Q0BCE3_BURCM]	259.99	27.11	1	4	4	9	166	18.8008	6.53662
Q0BEP5	Uncharacterized protein OS=Burkholderia ambifaria (strain ATCC BAA-244 / AMMD) OX=339670 GN=Bamb_1822 PE=4 SV=1 - [Q0BEP5_BURCM]	259.92	28.21	1	2	3	9	195	19.7344	9.74463
Q0BC88	Uncharacterized protein OS=Burkholderia ambifaria (strain ATCC BAA-244 / AMMD) OX=339670 GN=Bamb_2679 PE=4 SV=1 - [Q0BC88_BURCM]	259.44	60	1	4	4	14	70	7.95394	7.91357
Q0B5K4	3-oxoadipate enol-lactonase OS=Burkholderia ambifaria (strain ATCC BAA-244 / AMMD) OX=339670 GN=Bamb_5020 PE=4 SV=1 - [Q0B5K4_BURCM]	258.89	27.2	1	5	5	7	261	28.1333	6.44287
Q0B641	N-acylglucosamine 2-epimerase OS=Burkholderia ambifaria (strain ATCC BAA-244 / AMMD) OX=339670 GN=Bamb_4833 PE=4 SV=1 - [Q0B641_BURCM]	258.56	33.25	1	8	8	11	394	42.2098	6.3667
Q0BG99	Pirin domain protein OS=Burkholderia ambifaria (strain ATCC BAA-244 / AMMD) OX=339670 GN=Bamb_1266 PE=3 SV=1 - [Q0BG99_BURCM]	258.05	15.99	1	4	4	8	294	31.387	5.71924
Q0BHS1	Bis(5'-nucleosyl)-tetraphosphatase, symmetrical OS=Burkholderia ambifaria (strain ATCC BAA-244 / AMMD) OX=339670 GN=apaH PE=3 SV=1 - [Q0BHS1_BURCM]	257.95	39.78	1	7	7	14	279	30.5475	5.93506
Q0BEH0	Peptide methionine sulfoxide reductase MsrB OS=Burkholderia ambifaria (strain ATCC BAA-244 / AMMD) OX=339670 GN=msrB PE=3 SV=1 - [MSRB_BURCM]	257.92	32.17	1	3	3	6	143	16.2566	5.74463
Q0BE03	Succinyl-diaminopimelate desuccinylase OS=Burkholderia ambifaria (strain ATCC BAA-244 / AMMD) OX=339670 GN=dapE PE=3 SV=1 - [DAPE_BURCM]	257.74	24.27	1	5	5	8	379	40.6688	6.04932
Q0B6T5	Isovaleryl-CoA dehydrogenase OS=Burkholderia ambifaria (strain ATCC BAA-244 / AMMD) OX=339670 GN=Bamb_4588 PE=3 SV=1 - [Q0B6T5_BURCM]	256.94	28.75	1	7	7	11	393	42.8525	6.20166
Q0BAF4	Succinate dehydrogenase iron-sulfur subunit OS=Burkholderia ambifaria (strain ATCC BAA-244 / AMMD) OX=339670 GN=Bamb_3314 PE=3 SV=1 - [Q0BAF4_BURCM]	255.73	24.89	1	5	5	8	233	26.5643	6.53662
Q0B628	Ureidoglycolate lyase OS=Burkholderia ambifaria (strain ATCC BAA-244 / AMMD) OX=339670 GN=Bamb_4846 PE=3 SV=1 - [UGL_BURCM]	255.65	34.75	1	6	6	9	282	30.2174	5.40186
Q0BI93	OsmC family protein OS=Burkholderia ambifaria (strain ATCC BAA-244 / AMMD) OX=339670 GN=Bamb_0571 PE=4 SV=1 - [Q0BI93_BURCM]	255.41	43.57	1	6	6	11	140	14.9743	6.771
Q0B761	Malate dehydrogenase (Oxaloacetate-decarboxylating) (NADP(+))/Phosphate acetyltransferase OS=Burkholderia ambifaria (strain ATCC BAA-244 / AMMD) OX=339670 GN=Bamb_4462 PE=4 SV=1 - [Q0B761_BURCM]	254.35	27.28	1	9	11	16	766	82.6652	5.38916
Q0BJ37	30S ribosomal protein S17 OS=Burkholderia ambifaria (strain ATCC BAA-244 / AMMD) OX=339670 GN=rpsQ PE=3 SV=1 - [RS17_BURCM]	252.63	38.89	1	2	2	10	90	10.2545	9.80322
Q0BDP1	Two component transcriptional regulator, LuxR family OS=Burkholderia ambifaria (strain ATCC BAA-244 / AMMD) OX=339670 GN=Bamb_2176 PE=4 SV=1 - [Q0BDP1_BURCM]	252.61	35.38	1	4	4	9	212	23.5892	5.51611
Q0BHI8	6-phosphogluconolactonase OS=Burkholderia ambifaria (strain ATCC BAA-244 / AMMD) OX=339670 GN=Bamb_0826 PE=4 SV=1 - [Q0BHI8_BURCM]	251.75	38.05	1	6	6	12	226	23.9863	5.87158
Q0BFZ2	Uncharacterized protein OS=Burkholderia ambifaria (strain ATCC BAA-244 / AMMD) OX=339670 GN=Bamb_1373 PE=4 SV=1 - [Q0BFZ2_BURCM]	250.13	55.24	1	4	4	8	105	11.9011	7.1958
Q0BH38	Nicotinate phosphoribosyltransferase OS=Burkholderia ambifaria (strain ATCC BAA-244 / AMMD) OX=339670 GN=pncB PE=3 SV=1 - [PNCB_BURCM]	247.24	40.35	1	11	11	18	399	46.0811	6.31592
Q0BCA5	Uncharacterized protein OS=Burkholderia ambifaria (strain ATCC BAA-244 / AMMD) OX=339670 GN=Bamb_2662 PE=4 SV=1 - [Q0BCA5_BURCM]	247	31.76	1	3	3	10	148	15.2737	8.42627
Q0BBE3	Beta-lactamase domain protein OS=Burkholderia ambifaria (strain ATCC BAA-244 / AMMD) OX=339670 GN=Bamb_2974 PE=4 SV=1 - [Q0BBE3_BURCM]	244.26	27.34	1	6	6	16	384	43.1348	6.85889
Q0BEY7	Polyphenol oxidase OS=Burkholderia ambifaria (strain ATCC BAA-244 / AMMD) OX=339670 GN=Bamb_1730 PE=3 SV=1 - [Q0BEY7_BURCM]	243.32	50.18	1	8	8	16	279	29.2009	6.63916
Q0B3M8	ATPase AAA-2 domain protein OS=Burkholderia ambifaria (strain ATCC BAA-244 / AMMD) OX=339670 GN=Bamb_5698 PE=4 SV=1 - [Q0B3M8_BURCM]	243.31	24.22	1	8	8	12	607	66.3779	6.26514
Q0BJ30	50S ribosomal protein L18 OS=Burkholderia ambifaria (strain ATCC BAA-244 / AMMD) OX=339670 GN=rplR PE=3 SV=1 - [RL18_BURCM]	243.22	33.06	1	3	3	7	121	13.0981	10.5796
Q0BD89	Alcohol dehydrogenase, zinc-binding domain protein OS=Burkholderia ambifaria (strain ATCC BAA-244 / AMMD) OX=339670 GN=Bamb_2328 PE=4 SV=1 - [Q0BD89_BURCM]	243.2	51.23	1	9	9	14	324	34.3638	7.02002
Q0BJ59	Transcription termination/antitermination protein NusG OS=Burkholderia ambifaria (strain ATCC BAA-244 / AMMD) OX=339670 GN=nusG PE=3 SV=1 - [Q0BJ59_BURCM]	241.97	47.57	1	7	7	12	185	20.9097	7.50342
Q0BEW4	Nucleoside diphosphate kinase OS=Burkholderia ambifaria (strain ATCC BAA-244 / AMMD) OX=339670 GN=ndk PE=3 SV=1 - [NDK_BURCM]	241.05	43.26	1	5	5	15	141	15.3119	6.32861
Q0BB40	Glutathione S-transferase, N-terminal domain protein OS=Burkholderia ambifaria (strain ATCC BAA-244 / AMMD) OX=339670 GN=Bamb_3077 PE=4 SV=1 - [Q0BB40_BURCM]	240.83	46.51	1	7	7	11	215	23.6548	5.41455
Q0BE25	UDP-3-O-acylglucosamine N-acyltransferase OS=Burkholderia ambifaria (strain ATCC BAA-244 / AMMD) OX=339670 GN=lpxD PE=3 SV=1 - [LPXD_BURCM]	240.2	28.85	1	6	6	9	364	37.1802	6.60986
Q0BCL7	50S ribosomal protein L33 OS=Burkholderia ambifaria (strain ATCC BAA-244 / AMMD) OX=339670 GN=rpmG PE=3 SV=1 - [RL33_BURCM]	239.57	43.64	1	3	3	8	55	6.37744	10.1255
Q0B2K2	NAD(P)H dehydrogenase (quinone) OS=Burkholderia ambifaria (strain ATCC BAA-244 / AMMD) OX=339670 GN=Bamb_6077 PE=3 SV=1 - [NQOR_BURCM]	238.79	33	1	5	5	10	200	20.9096	6.80029
Q0BGV1	Arginine succinyltransferase OS=Burkholderia ambifaria (strain ATCC BAA-244 / AMMD) OX=339670 GN=Bamb_1063 PE=4 SV=1 - [Q0BGV1_BURCM]	238.76	41.38	1	7	7	11	348	37.9672	5.57959
Q0BE99	Uncharacterized protein OS=Burkholderia ambifaria (strain ATCC BAA-244 / AMMD) OX=339670 GN=Bamb_1968 PE=4 SV=1 - [Q0BE99_BURCM]	238.66	52.76	1	6	6	13	163	17.8507	5.99854
Q0BDY9	Acyl-coA-binding protein, ACBP OS=Burkholderia ambifaria (strain ATCC BAA-244 / AMMD) OX=339670 GN=Bamb_2078 PE=4 SV=1 - [Q0BDY9_BURCM]	238.08	66.29	1	4	4	9	89	9.80094	5.13525
Q0BGY7	Methionine aminopeptidase OS=Burkholderia ambifaria (strain ATCC BAA-244 / AMMD) OX=339670 GN=map PE=3 SV=1 - [Q0BGY7_BURCM]	237.22	30.97	1	5	5	8	268	29.2037	6.39209
Q0B2S1	ProQ activator of osmoprotectant transporter ProP OS=Burkholderia ambifaria (strain ATCC BAA-244 / AMMD) OX=339670 GN=Bamb_6008 PE=4 SV=1 - [Q0B2S1_BURCM]	237.21	18.31	1	5	5	9	284	28.4606	9.89111
Q0B880	Hydroxylamine reductase OS=Burkholderia ambifaria (strain ATCC BAA-244 / AMMD) OX=339670 GN=hcp PE=3 SV=1 - [HCP_BURCM]	236.97	21.08	1	6	6	11	555	58.8592	6.354
Q0BF35	2-nitropropane dioxygenase, NPD OS=Burkholderia ambifaria (strain ATCC BAA-244 / AMMD) OX=339670 GN=Bamb_1681 PE=4 SV=1 - [Q0BF35_BURCM]	236.26	36.11	1	10	10	16	396	42.4103	7.82568
Q0BH69	30S ribosomal protein S16 OS=Burkholderia ambifaria (strain ATCC BAA-244 / AMMD) OX=339670 GN=rpsP PE=3 SV=1 - [RS16_BURCM]	236.16	47.62	1	3	3	12	84	9.46914	11.1948
Q0BC97	N5-carboxyaminoimidazole ribonucleotide synthase OS=Burkholderia ambifaria (strain ATCC BAA-244 / AMMD) OX=339670 GN=purK PE=3 SV=1 - [Q0BC97_BURCM]	235.93	34.67	1	6	6	13	398	41.5371	5.77002
Q0BJB7	Histone family protein nucleoid-structuring protein H-NS OS=Burkholderia ambifaria (strain ATCC BAA-244 / AMMD) OX=339670 GN=Bamb_0195 PE=4 SV=1 - [Q0BJB7_BURCM]	235.02	25.77	1	2	2	6	97	10.8898	9.81787
Q0B204	Uncharacterized protein OS=Burkholderia ambifaria (strain ATCC BAA-244 / AMMD) OX=339670 GN=Bamb_6275 PE=4 SV=1 - [Q0B204_BURCM]	232.25	33.1	1	3	3	7	145	16.1457	4.43701
Q0B688	Uncharacterized protein OS=Burkholderia ambifaria (strain ATCC BAA-244 / AMMD) OX=339670 GN=Bamb_4786 PE=4 SV=1 - [Q0B688_BURCM]	232.2	23.88	1	7	7	13	335	37.6259	6.0874
Q0BDH1	Uncharacterized protein OS=Burkholderia ambifaria (strain ATCC BAA-244 / AMMD) OX=339670 GN=Bamb_2246 PE=4 SV=1 - [Q0BDH1_BURCM]	231.79	57.27	1	5	5	10	110	11.8713	9.0415
Q0B5U7	OsmC family protein OS=Burkholderia ambifaria (strain ATCC BAA-244 / AMMD) OX=339670 GN=Bamb_4927 PE=4 SV=1 - [Q0B5U7_BURCM]	231.08	31.65	1	3	3	7	158	17.4425	6.354
Q0BG29	Flavodoxin/nitric oxide synthase OS=Burkholderia ambifaria (strain ATCC BAA-244 / AMMD) OX=339670 GN=Bamb_1336 PE=3 SV=1 - [Q0BG29_BURCM]	231.02	49.51	1	6	6	11	206	21.0947	6.52197
Q0BHG0	Uncharacterized protein OS=Burkholderia ambifaria (strain ATCC BAA-244 / AMMD) OX=339670 GN=Bamb_0854 PE=4 SV=1 - [Q0BHG0_BURCM]	230.54	36.09	1	3	3	6	133	14.0961	6.52197
Q0BEG8	Transcriptional regulator, BolA protein family OS=Burkholderia ambifaria (strain ATCC BAA-244 / AMMD) OX=339670 GN=Bamb_1899 PE=3 SV=1 - [Q0BEG8_BURCM]	230.33	50	1	4	4	7	102	10.7365	6.03662
Q0BH17	3-oxoacyl-[acyl-carrier-protein] synthase 3 OS=Burkholderia ambifaria (strain ATCC BAA-244 / AMMD) OX=339670 GN=fabH PE=3 SV=1 - [Q0BH17_BURCM]	229.29	43.47	1	9	9	13	329	35.002	6.16357
Q0BAG2	2-methylcitrate dehydratase OS=Burkholderia ambifaria (strain ATCC BAA-244 / AMMD) OX=339670 GN=Bamb_3306 PE=4 SV=1 - [Q0BAG2_BURCM]	229.01	21.53	1	7	7	9	483	52.3871	6.0874
Q0BC60	Uncharacterized protein OS=Burkholderia ambifaria (strain ATCC BAA-244 / AMMD) OX=339670 GN=Bamb_2707 PE=4 SV=1 - [Q0BC60_BURCM]	228.21	71.28	1	4	4	11	94	9.76584	6.49365
Q0BG45	UTP--glucose-1-phosphate uridylyltransferase OS=Burkholderia ambifaria (strain ATCC BAA-244 / AMMD) OX=339670 GN=Bamb_1320 PE=3 SV=1 - [Q0BG45_BURCM]	228.1	41.84	1	7	7	14	294	32.2038	6.01123
Q0BIM3	Ribulose-phosphate 3-epimerase OS=Burkholderia ambifaria (strain ATCC BAA-244 / AMMD) OX=339670 GN=Bamb_0441 PE=3 SV=1 - [Q0BIM3_BURCM]	228.04	33.33	1	5	5	12	228	24.9678	5.59229
Q0B2K3	Uncharacterized protein OS=Burkholderia ambifaria (strain ATCC BAA-244 / AMMD) OX=339670 GN=Bamb_6076 PE=4 SV=1 - [Q0B2K3_BURCM]	227.96	40.19	1	3	3	6	107	10.8758	10.2866
Q0BEX9	Phosphoribosyltransferase OS=Burkholderia ambifaria (strain ATCC BAA-244 / AMMD) OX=339670 GN=Bamb_1738 PE=4 SV=1 - [Q0BEX9_BURCM]	227.19	18.69	1	2	2	6	198	22.4324	6.29053
Q0BJP4	Putative pterin-4-alpha-carbinolamine dehydratase OS=Burkholderia ambifaria (strain ATCC BAA-244 / AMMD) OX=339670 GN=Bamb_0068 PE=3 SV=1 - [PHS_BURCM]	226.17	75.49	1	5	5	12	102	11.7829	6.96143
Q0BEM9	Stress responsive alpha-beta barrel domain protein OS=Burkholderia ambifaria (strain ATCC BAA-244 / AMMD) OX=339670 GN=Bamb_1838 PE=4 SV=1 - [Q0BEM9_BURCM]	225.85	20.19	1	3	3	6	104	11.4319	5.8335
Q0BG85	Uncharacterized protein OS=Burkholderia ambifaria (strain ATCC BAA-244 / AMMD) OX=339670 GN=Bamb_1280 PE=4 SV=1 - [Q0BG85_BURCM]	225.36	28.91	1	4	4	10	128	13.6879	9.43701
Q0BIW3	Phosphoribosyl-AMP cyclohydrolase OS=Burkholderia ambifaria (strain ATCC BAA-244 / AMMD) OX=339670 GN=hisI PE=3 SV=1 - [HIS3_BURCM]	225.13	42.75	1	4	4	8	138	15.8329	6.02393
Q0B3Z3	HAD-superfamily hydrolase, subfamily IA, variant 3 OS=Burkholderia ambifaria (strain ATCC BAA-244 / AMMD) OX=339670 GN=Bamb_5583 PE=4 SV=1 - [Q0B3Z3_BURCM]	224.76	49.11	1	7	7	11	224	24.4918	5.33838
Q0BJ41	50S ribosomal protein L22 OS=Burkholderia ambifaria (strain ATCC BAA-244 / AMMD) OX=339670 GN=rplV PE=3 SV=1 - [RL22_BURCM]	224.63	35.78	1	4	4	10	109	11.8086	10.2427
Q0BFQ4	Enoyl-CoA hydratase/isomerase OS=Burkholderia ambifaria (strain ATCC BAA-244 / AMMD) OX=339670 GN=Bamb_1461 PE=4 SV=1 - [Q0BFQ4_BURCM]	223.67	23.77	1	6	6	8	387	41.6319	5.77002
Q0BCV3	Short-chain dehydrogenase/reductase SDR OS=Burkholderia ambifaria (strain ATCC BAA-244 / AMMD) OX=339670 GN=Bamb_2464 PE=4 SV=1 - [Q0BCV3_BURCM]	222.25	30.56	1	5	5	9	252	26.6125	5.46533
Q0BD59	Formate-dependent phosphoribosylglycinamide formyltransferase OS=Burkholderia ambifaria (strain ATCC BAA-244 / AMMD) OX=339670 GN=purT PE=3 SV=1 - [PURT_BURCM]	221.45	36.63	1	8	8	11	404	42.9834	5.85889
Q0B3L2	Universal stress protein OS=Burkholderia ambifaria (strain ATCC BAA-244 / AMMD) OX=339670 GN=Bamb_5714 PE=3 SV=1 - [Q0B3L2_BURCM]	220.95	35.22	1	5	5	8	159	16.9699	5.94775
Q0BFZ6	Uncharacterized lipoprotein-like protein OS=Burkholderia ambifaria (strain ATCC BAA-244 / AMMD) OX=339670 GN=Bamb_1369 PE=4 SV=1 - [Q0BFZ6_BURCM]	220.05	11.44	1	3	3	5	402	43.8582	7.06396
Q0BF02	Uncharacterized protein OS=Burkholderia ambifaria (strain ATCC BAA-244 / AMMD) OX=339670 GN=Bamb_1715 PE=4 SV=1 - [Q0BF02_BURCM]	219.7	37.16	1	6	6	10	218	23.1848	10.4185
Q0BEF8	Lon protease OS=Burkholderia ambifaria (strain ATCC BAA-244 / AMMD) OX=339670 GN=lon PE=2 SV=1 - [Q0BEF8_BURCM]	219.5	10.29	1	6	6	10	807	89.1665	6.44287
Q0BER5	Alkyl hydroperoxide reductase/ Thiol specific antioxidant/ Mal allergen OS=Burkholderia ambifaria (strain ATCC BAA-244 / AMMD) OX=339670 GN=Bamb_1802 PE=4 SV=1 - [Q0BER5_BURCM]	218.52	36.6	1	4	4	5	153	16.8508	7.95752
Q0BFK5	Putative serine protein kinase, PrkA OS=Burkholderia ambifaria (strain ATCC BAA-244 / AMMD) OX=339670 GN=Bamb_1510 PE=4 SV=1 - [Q0BFK5_BURCM]	218.44	15.16	1	6	6	9	640	73.3542	5.65576
Q0BCM1	4-hydroxy-3-methylbut-2-enyl diphosphate reductase OS=Burkholderia ambifaria (strain ATCC BAA-244 / AMMD) OX=339670 GN=ispH PE=3 SV=1 - [Q0BCM1_BURCM]	217.44	45.4	1	9	9	15	326	35.2945	6.03662
Q0B8Z3	Antibiotic biosynthesis monooxygenase OS=Burkholderia ambifaria (strain ATCC BAA-244 / AMMD) OX=339670 GN=Bamb_3826 PE=4 SV=1 - [Q0B8Z3_BURCM]	215.81	68.69	1	3	3	6	99	11.0025	5.40186
Q0B4I6	FAD-dependent pyridine nucleotide-disulfide oxidoreductase OS=Burkholderia ambifaria (strain ATCC BAA-244 / AMMD) OX=339670 GN=Bamb_5390 PE=3 SV=1 - [Q0B4I6_BURCM]	215.51	17.25	1	5	5	9	458	48.9031	6.21436
Q0BJA2	PAAR repeat-containing protein OS=Burkholderia ambifaria (strain ATCC BAA-244 / AMMD) OX=339670 GN=Bamb_0211 PE=4 SV=1 - [Q0BJA2_BURCM]	214.78	56.99	1	4	4	9	93	9.95396	6.7124
Q0BGZ9	Beta-hexosaminidase OS=Burkholderia ambifaria (strain ATCC BAA-244 / AMMD) OX=339670 GN=nagZ PE=3 SV=1 - [Q0BGZ9_BURCM]	214.51	28.95	1	7	7	11	342	37.0524	7.59131
Q0B9U3	Proline iminopeptidase OS=Burkholderia ambifaria (strain ATCC BAA-244 / AMMD) OX=339670 GN=Bamb_3526 PE=3 SV=1 - [Q0B9U3_BURCM]	211.51	21.94	1	7	7	13	310	34.6243	5.73193
Q0BFF9	Cobalamin biosynthesis protein CobW OS=Burkholderia ambifaria (strain ATCC BAA-244 / AMMD) OX=339670 GN=Bamb_1556 PE=4 SV=1 - [Q0BFF9_BURCM]	211.04	19.34	1	4	4	6	362	39.3057	4.89404
Q0BFA9	2-nitropropane dioxygenase, NPD OS=Burkholderia ambifaria (strain ATCC BAA-244 / AMMD) OX=339670 GN=Bamb_1606 PE=4 SV=1 - [Q0BFA9_BURCM]	210.01	22.4	1	5	5	8	366	37.9817	6.53662
Q0BDL1	Formimidoylglutamate deiminase OS=Burkholderia ambifaria (strain ATCC BAA-244 / AMMD) OX=339670 GN=Bamb_2206 PE=4 SV=1 - [Q0BDL1_BURCM]	209.97	20.52	1	5	5	9	458	50.0482	6.49365
Q0BEV5	L-carnitine dehydratase/bile acid-inducible protein F OS=Burkholderia ambifaria (strain ATCC BAA-244 / AMMD) OX=339670 GN=Bamb_1762 PE=4 SV=1 - [Q0BEV5_BURCM]	209.6	23.19	1	7	7	11	401	42.8492	5.77002
Q0B2V2	Metal dependent phosphohydrolase OS=Burkholderia ambifaria (strain ATCC BAA-244 / AMMD) OX=339670 GN=Bamb_5977 PE=4 SV=1 - [Q0B2V2_BURCM]	209.07	25.86	1	3	3	6	174	19.6622	5.85889
Q0BHV7	Aminotransferase, class V OS=Burkholderia ambifaria (strain ATCC BAA-244 / AMMD) OX=339670 GN=Bamb_0707 PE=3 SV=1 - [Q0BHV7_BURCM]	207.85	10.67	1	3	3	5	403	43.3282	6.13818
Q0B7N4	Amino acid ABC transporter substrate-binding protein, PAAT family OS=Burkholderia ambifaria (strain ATCC BAA-244 / AMMD) OX=339670 GN=Bamb_4286 PE=4 SV=1 - [Q0B7N4_BURCM]	207.34	41.7	1	7	7	9	259	28.0435	8.47021
Q0BE27	Acyl-[acyl-carrier-protein]--UDP-N-acetylglucosamine O-acyltransferase OS=Burkholderia ambifaria (strain ATCC BAA-244 / AMMD) OX=339670 GN=lpxA PE=3 SV=1 - [LPXA_BURCM]	207.3	45.04	1	5	5	12	262	27.8313	6.65381
Q0BBQ0	Phosphopantetheine adenylyltransferase OS=Burkholderia ambifaria (strain ATCC BAA-244 / AMMD) OX=339670 GN=coaD PE=3 SV=1 - [COAD_BURCM]	206.89	41.82	1	6	6	12	165	18.4165	8.36768
Q0B411	Amino acid ABC transporter substrate-binding protein, PAAT family OS=Burkholderia ambifaria (strain ATCC BAA-244 / AMMD) OX=339670 GN=Bamb_5565 PE=3 SV=1 - [Q0B411_BURCM]	206.61	23.85	1	3	4	7	260	28.0136	8.54346
Q0BC09	Lactoylglutathione lyase OS=Burkholderia ambifaria (strain ATCC BAA-244 / AMMD) OX=339670 GN=Bamb_2758 PE=4 SV=1 - [Q0BC09_BURCM]	206.5	35.66	1	5	5	11	129	14.4593	6.0874
Q0BE98	Uncharacterized protein OS=Burkholderia ambifaria (strain ATCC BAA-244 / AMMD) OX=339670 GN=Bamb_1969 PE=4 SV=1 - [Q0BE98_BURCM]	204.76	25	1	7	7	12	316	35.9449	6.44287
Q0BCX0	Uncharacterized protein OS=Burkholderia ambifaria (strain ATCC BAA-244 / AMMD) OX=339670 GN=Bamb_2447 PE=4 SV=1 - [Q0BCX0_BURCM]	204.73	24.59	1	3	3	6	183	20.4741	9.78857
Q0BHR7	GDP-L-fucose synthase OS=Burkholderia ambifaria (strain ATCC BAA-244 / AMMD) OX=339670 GN=fcl PE=3 SV=1 - [Q0BHR7_BURCM]	204.59	16.4	1	3	3	7	311	34.1219	6.85889
Q0BFR5	Ribose-5-phosphate isomerase A OS=Burkholderia ambifaria (strain ATCC BAA-244 / AMMD) OX=339670 GN=rpiA PE=3 SV=1 - [RPIA_BURCM]	204.27	27.39	1	4	4	8	230	23.8765	5.26221
Q0BDI7	Acetyl-coenzyme A synthetase OS=Burkholderia ambifaria (strain ATCC BAA-244 / AMMD) OX=339670 GN=acsA PE=3 SV=1 - [Q0BDI7_BURCM]	202.99	13.48	2	6	6	10	660	72.0716	6.27783
Q0BI15	3-methyl-2-oxobutanoate hydroxymethyltransferase 1 OS=Burkholderia ambifaria (strain ATCC BAA-244 / AMMD) OX=339670 GN=panB1 PE=3 SV=1 - [PANB1_BURCM]	202.87	25.09	1	4	4	8	271	28.7219	6.41748
Q0BC06	4-hydroxythreonine-4-phosphate dehydrogenase OS=Burkholderia ambifaria (strain ATCC BAA-244 / AMMD) OX=339670 GN=pdxA PE=3 SV=1 - [Q0BC06_BURCM]	202.09	37.08	1	8	8	14	329	34.0328	6.17627
Q0BAX7	Response regulator receiver protein OS=Burkholderia ambifaria (strain ATCC BAA-244 / AMMD) OX=339670 GN=Bamb_3140 PE=4 SV=1 - [Q0BAX7_BURCM]	201.23	24.44	1	3	3	7	180	19.6683	5.87158
Q0B5Z3	Aromatic ring-cleaving dioxygenase-like protein OS=Burkholderia ambifaria (strain ATCC BAA-244 / AMMD) OX=339670 GN=Bamb_4881 PE=4 SV=1 - [Q0B5Z3_BURCM]	200.1	45.3	1	5	5	11	117	13.2106	5.63037
Q0BJ58	50S ribosomal protein L11 OS=Burkholderia ambifaria (strain ATCC BAA-244 / AMMD) OX=339670 GN=rplK PE=3 SV=1 - [RL11_BURCM]	199.83	30.77	1	4	4	11	143	14.892	9.83252
Q0BIJ5	Redoxin domain protein OS=Burkholderia ambifaria (strain ATCC BAA-244 / AMMD) OX=339670 GN=Bamb_0469 PE=4 SV=1 - [Q0BIJ5_BURCM]	199.73	45.24	1	5	5	8	168	17.6878	5.2749
Q0BJ23	30S ribosomal protein S13 OS=Burkholderia ambifaria (strain ATCC BAA-244 / AMMD) OX=339670 GN=rpsM PE=3 SV=1 - [RS13_BURCM]	199.69	52.07	1	6	6	12	121	13.6314	11.2241
Q0BHW2	Fumarylacetoacetate hydrolase OS=Burkholderia ambifaria (strain ATCC BAA-244 / AMMD) OX=339670 GN=Bamb_0702 PE=4 SV=1 - [Q0BHW2_BURCM]	199.12	22.81	1	7	7	9	434	47.0587	6.0874
Q0B5X5	Uncharacterized protein OS=Burkholderia ambifaria (strain ATCC BAA-244 / AMMD) OX=339670 GN=Bamb_4899 PE=4 SV=1 - [Q0B5X5_BURCM]	198.63	35.19	1	4	4	6	162	18.1371	9.0415
Q0BGY6	Putative GAF sensor protein OS=Burkholderia ambifaria (strain ATCC BAA-244 / AMMD) OX=339670 GN=Bamb_1028 PE=4 SV=1 - [Q0BGY6_BURCM]	197.91	25.15	1	4	4	7	167	18.171	4.97021
Q0BAI2	Uncharacterized protein OS=Burkholderia ambifaria (strain ATCC BAA-244 / AMMD) OX=339670 GN=Bamb_3286 PE=4 SV=1 - [Q0BAI2_BURCM]	196.77	29.82	1	3	3	5	114	11.654	9.40771
Q0BCG5	UDP-N-acetylenolpyruvoylglucosamine reductase OS=Burkholderia ambifaria (strain ATCC BAA-244 / AMMD) OX=339670 GN=murB PE=3 SV=1 - [MURB_BURCM]	196.24	29.51	1	8	8	11	349	37.7556	6.7417
Q0B9G9	Uncharacterized protein OS=Burkholderia ambifaria (strain ATCC BAA-244 / AMMD) OX=339670 GN=Bamb_3650 PE=4 SV=1 - [Q0B9G9_BURCM]	196.13	58.26	1	5	5	11	115	12.4012	6.52197
Q0BD81	Ribosomal silencing factor RsfS OS=Burkholderia ambifaria (strain ATCC BAA-244 / AMMD) OX=339670 GN=rsfS PE=3 SV=1 - [Q0BD81_BURCM]	195.74	71.92	1	6	6	11	146	16.0862	5.2876
Q0BJ21	30S ribosomal protein S4 OS=Burkholderia ambifaria (strain ATCC BAA-244 / AMMD) OX=339670 GN=rpsD PE=3 SV=2 - [RS4_BURCM]	194.43	29.47	1	5	5	8	207	23.1713	10.1255
Q0B6K1	RbsD or FucU transport OS=Burkholderia ambifaria (strain ATCC BAA-244 / AMMD) OX=339670 GN=Bamb_4672 PE=3 SV=1 - [Q0B6K1_BURCM]	194.33	55.63	1	5	5	11	151	16.2834	5.32568
Q0BG17	Thioesterase superfamily protein OS=Burkholderia ambifaria (strain ATCC BAA-244 / AMMD) OX=339670 GN=Bamb_1348 PE=4 SV=1 - [Q0BG17_BURCM]	192.95	35.66	1	4	4	7	143	15.9108	5.85889
Q0BE14	Methionine aminopeptidase OS=Burkholderia ambifaria (strain ATCC BAA-244 / AMMD) OX=339670 GN=map PE=3 SV=1 - [Q0BE14_BURCM]	192.71	44.28	1	7	7	13	271	29.6119	6.21436
Q0B126	Uncharacterized protein OS=Burkholderia ambifaria (strain ATCC BAA-244 / AMMD) OX=339670 GN=Bamb_6604 PE=4 SV=1 - [Q0B126_BURCM]	191.56	18.66	1	4	4	6	343	36.7467	5.2876
Q0BDQ9	Ferredoxin, 2Fe-2S type, ISC system OS=Burkholderia ambifaria (strain ATCC BAA-244 / AMMD) OX=339670 GN=Bamb_2158 PE=4 SV=1 - [Q0BDQ9_BURCM]	191.17	56.64	1	4	4	8	113	12.4399	4.4751
Q0B6C0	2,5-didehydrogluconate reductase OS=Burkholderia ambifaria (strain ATCC BAA-244 / AMMD) OX=339670 GN=Bamb_4753 PE=4 SV=1 - [Q0B6C0_BURCM]	190.99	22.39	1	4	4	6	268	28.9051	5.33838
Q0BI75	Glutathione S-transferase, N-terminal domain protein OS=Burkholderia ambifaria (strain ATCC BAA-244 / AMMD) OX=339670 GN=Bamb_0589 PE=4 SV=1 - [Q0BI75_BURCM]	190.23	24.51	1	3	3	5	204	22.7768	7.34229
Q0B3L7	Respiratory nitrate reductase chaperone NarJ OS=Burkholderia ambifaria (strain ATCC BAA-244 / AMMD) OX=339670 GN=Bamb_5709 PE=4 SV=1 - [Q0B3L7_BURCM]	189.61	24.46	1	5	5	8	233	25.6369	5.021
Q0BFP0	Uncharacterized protein OS=Burkholderia ambifaria (strain ATCC BAA-244 / AMMD) OX=339670 GN=Bamb_1475 PE=4 SV=1 - [Q0BFP0_BURCM]	189.56	55.88	1	4	4	7	102	10.9956	5.19873
Q0BGH0	Phosphohistidine phosphatase, SixA OS=Burkholderia ambifaria (strain ATCC BAA-244 / AMMD) OX=339670 GN=Bamb_1195 PE=4 SV=1 - [Q0BGH0_BURCM]	188.38	26.97	1	3	3	7	152	16.2796	8.5874
Q0BB67	Glutathione reductase OS=Burkholderia ambifaria (strain ATCC BAA-244 / AMMD) OX=339670 GN=Bamb_3050 PE=3 SV=1 - [Q0BB67_BURCM]	188.11	11.09	1	4	4	7	451	48.2191	6.7417
Q0B5D4	Uncharacterized protein OS=Burkholderia ambifaria (strain ATCC BAA-244 / AMMD) OX=339670 GN=Bamb_5090 PE=4 SV=1 - [Q0B5D4_BURCM]	187.72	24.31	1	3	3	7	144	15.6799	5.13525
Q0BI92	Uncharacterized protein OS=Burkholderia ambifaria (strain ATCC BAA-244 / AMMD) OX=339670 GN=Bamb_0572 PE=4 SV=1 - [Q0BI92_BURCM]	185.06	22.77	1	2	2	4	101	10.2984	10.5796
Q0BBW9	CHRD domain containing protein OS=Burkholderia ambifaria (strain ATCC BAA-244 / AMMD) OX=339670 GN=Bamb_2798 PE=4 SV=1 - [Q0BBW9_BURCM]	184.88	27.08	1	3	3	10	144	15.0516	6.88818
Q0B7W7	2-dehydropantoate 2-reductase OS=Burkholderia ambifaria (strain ATCC BAA-244 / AMMD) OX=339670 GN=Bamb_4203 PE=3 SV=1 - [Q0B7W7_BURCM]	183.41	21.27	1	5	5	10	315	33.4945	7.10791
Q0BEY2	Uncharacterized protein OS=Burkholderia ambifaria (strain ATCC BAA-244 / AMMD) OX=339670 GN=Bamb_1735 PE=4 SV=1 - [Q0BEY2_BURCM]	183.34	18	1	4	4	7	250	27.4547	9.29053
Q0BAT0	D-isomer specific 2-hydroxyacid dehydrogenase, NAD-binding protein OS=Burkholderia ambifaria (strain ATCC BAA-244 / AMMD) OX=339670 GN=Bamb_3187 PE=3 SV=1 - [Q0BAT0_BURCM]	183.08	15.43	1	3	4	7	337	37.3833	6.88818
Q0BHJ4	Riboflavin synthase, alpha subunit OS=Burkholderia ambifaria (strain ATCC BAA-244 / AMMD) OX=339670 GN=Bamb_0820 PE=4 SV=1 - [Q0BHJ4_BURCM]	182.67	36.84	1	5	5	9	209	22.0834	5.74463
Q0BD32	Uncharacterized protein OS=Burkholderia ambifaria (strain ATCC BAA-244 / AMMD) OX=339670 GN=Bamb_2385 PE=4 SV=1 - [Q0BD32_BURCM]	182.58	33.91	1	6	6	13	230	24.7307	6.3667
Q0B5R0	Arsenate reductase OS=Burkholderia ambifaria (strain ATCC BAA-244 / AMMD) OX=339670 GN=Bamb_4964 PE=3 SV=1 - [Q0B5R0_BURCM]	182.58	37.82	1	3	3	5	119	13.388	6.31592
Q0B6P9	Inosine/uridine-preferring nucleoside hydrolase OS=Burkholderia ambifaria (strain ATCC BAA-244 / AMMD) OX=339670 GN=Bamb_4624 PE=4 SV=1 - [Q0B6P9_BURCM]	182.22	9.71	1	2	2	4	350	37.1126	6.93213
Q0BBF2	Methionine synthase (B12-dependent) OS=Burkholderia ambifaria (strain ATCC BAA-244 / AMMD) OX=339670 GN=Bamb_2965 PE=4 SV=1 - [Q0BBF2_BURCM]	182.12	12.68	1	3	3	5	355	38.3243	5.0083
Q0B5Y8	Phospho-2-dehydro-3-deoxyheptonate aldolase OS=Burkholderia ambifaria (strain ATCC BAA-244 / AMMD) OX=339670 GN=Bamb_4886 PE=3 SV=1 - [Q0B5Y8_BURCM]	181.97	26.33	1	6	7	11	376	40.9608	6.25244
Q0BB92	Short-chain dehydrogenase/reductase SDR OS=Burkholderia ambifaria (strain ATCC BAA-244 / AMMD) OX=339670 GN=Bamb_3025 PE=4 SV=1 - [Q0BB92_BURCM]	180.61	12.96	1	2	2	4	247	24.2606	5.78271
Q0BJQ1	Transcriptional regulator, MarR family OS=Burkholderia ambifaria (strain ATCC BAA-244 / AMMD) OX=339670 GN=Bamb_0061 PE=4 SV=1 - [Q0BJQ1_BURCM]	180.53	33.96	1	4	4	7	212	22.946	9.43701
Q0B6N4	Peptidase S10, serine carboxypeptidase OS=Burkholderia ambifaria (strain ATCC BAA-244 / AMMD) OX=339670 GN=Bamb_4639 PE=4 SV=1 - [Q0B6N4_BURCM]	180.22	18.28	1	5	5	8	558	60.1381	6.44287
Q0B541	Efflux transporter, RND family, MFP subunit OS=Burkholderia ambifaria (strain ATCC BAA-244 / AMMD) OX=339670 GN=Bamb_5183 PE=4 SV=1 - [Q0B541_BURCM]	180.08	39.67	1	3	3	6	121	12.3263	9.08545
Q0B6N7	Uncharacterized protein OS=Burkholderia ambifaria (strain ATCC BAA-244 / AMMD) OX=339670 GN=Bamb_4636 PE=4 SV=1 - [Q0B6N7_BURCM]	180	63.93	1	3	3	4	61	7.01748	4.65283
Q0BGL8	Uncharacterized protein OS=Burkholderia ambifaria (strain ATCC BAA-244 / AMMD) OX=339670 GN=Bamb_1147 PE=4 SV=1 - [Q0BGL8_BURCM]	179.66	16.79	1	7	7	10	548	60.1682	6.93213
Q0BBJ5	Uncharacterized protein OS=Burkholderia ambifaria (strain ATCC BAA-244 / AMMD) OX=339670 GN=Bamb_2922 PE=4 SV=1 - [Q0BBJ5_BURCM]	178.64	28.92	1	2	2	4	83	9.44999	6.771
Q0B2U9	Late embryogenesis abundant protein OS=Burkholderia ambifaria (strain ATCC BAA-244 / AMMD) OX=339670 GN=Bamb_5980 PE=4 SV=1 - [Q0B2U9_BURCM]	178.02	21.08	1	2	2	5	185	16.3144	9.90576
Q0BJK9	Bifunctional protein PutA OS=Burkholderia ambifaria (strain ATCC BAA-244 / AMMD) OX=339670 GN=Bamb_0103 PE=3 SV=1 - [Q0BJK9_BURCM]	176.81	7.33	1	5	6	12	1310	140.182	6.25244
Q0BHD3	Guanine deaminase OS=Burkholderia ambifaria (strain ATCC BAA-244 / AMMD) OX=339670 GN=Bamb_0881 PE=4 SV=1 - [Q0BHD3_BURCM]	174.9	17.12	1	5	5	7	438	48.1372	6.354
Q0B124	Uncharacterized protein OS=Burkholderia ambifaria (strain ATCC BAA-244 / AMMD) OX=339670 GN=Bamb_6606 PE=4 SV=1 - [Q0B124_BURCM]	173.72	28.57	1	4	5	7	217	24.0374	8.45557
Q0BDT0	PHP C-terminal domain protein OS=Burkholderia ambifaria (strain ATCC BAA-244 / AMMD) OX=339670 GN=Bamb_2137 PE=4 SV=1 - [Q0BDT0_BURCM]	173.23	17.75	1	4	4	6	276	29.9871	6.30322
Q0BJ34	50S ribosomal protein L5 OS=Burkholderia ambifaria (strain ATCC BAA-244 / AMMD) OX=339670 GN=rplE PE=3 SV=1 - [RL5_BURCM]	173.1	36.31	1	6	6	11	179	20.0288	9.87646
Q0B5L2	Serine O-acetyltransferase OS=Burkholderia ambifaria (strain ATCC BAA-244 / AMMD) OX=339670 GN=Bamb_5012 PE=4 SV=1 - [Q0B5L2_BURCM]	171.97	18.95	1	4	4	6	306	33.0843	6.80029
Q0BGX9	Trehalose 6-phosphate phosphatase OS=Burkholderia ambifaria (strain ATCC BAA-244 / AMMD) OX=339670 GN=Bamb_1035 PE=3 SV=1 - [Q0BGX9_BURCM]	171.78	30.8	1	5	5	8	250	26.981	5.52881
Q0BCA6	Uncharacterized protein OS=Burkholderia ambifaria (strain ATCC BAA-244 / AMMD) OX=339670 GN=Bamb_2661 PE=4 SV=1 - [Q0BCA6_BURCM]	171.69	30.25	1	3	3	6	119	13.1516	5.73193
Q0BGQ8	Uncharacterized protein OS=Burkholderia ambifaria (strain ATCC BAA-244 / AMMD) OX=339670 GN=Bamb_1106 PE=4 SV=1 - [Q0BGQ8_BURCM]	170.87	25.3	1	3	3	6	83	8.53699	9.34912
Q0BF01	Zinc-type alcohol dehydrogenase-like protein OS=Burkholderia ambifaria (strain ATCC BAA-244 / AMMD) OX=339670 GN=Bamb_1716 PE=3 SV=1 - [Q0BF01_BURCM]	170.71	18.88	1	4	4	8	339	36.3062	6.13818
Q0BH20	Uncharacterized protein OS=Burkholderia ambifaria (strain ATCC BAA-244 / AMMD) OX=339670 GN=Bamb_0994 PE=4 SV=1 - [Q0BH20_BURCM]	170.69	24.64	1	3	3	6	211	23.2232	4.4624
Q0BFL8	Sulfate ABC transporter, periplasmic sulfate-binding protein OS=Burkholderia ambifaria (strain ATCC BAA-244 / AMMD) OX=339670 GN=Bamb_1497 PE=4 SV=1 - [Q0BFL8_BURCM]	170.34	21.16	1	4	4	6	345	37.3565	9.37842
Q0BD47	Cytochrome c, class I OS=Burkholderia ambifaria (strain ATCC BAA-244 / AMMD) OX=339670 GN=Bamb_2370 PE=4 SV=1 - [Q0BD47_BURCM]	170.2	37.82	1	2	2	3	119	12.6644	8.98291
Q0BBF7	Enoyl-CoA hydratase/isomerase OS=Burkholderia ambifaria (strain ATCC BAA-244 / AMMD) OX=339670 GN=Bamb_2960 PE=3 SV=1 - [Q0BBF7_BURCM]	169.62	29.45	1	5	5	9	275	29.6091	5.69385
Q0BJ38	50S ribosomal protein L29 OS=Burkholderia ambifaria (strain ATCC BAA-244 / AMMD) OX=339670 GN=rpmC PE=3 SV=1 - [RL29_BURCM]	169	46.88	1	4	4	8	64	7.30704	10.7261
Q0B5S3	Squalene-hopene cyclase OS=Burkholderia ambifaria (strain ATCC BAA-244 / AMMD) OX=339670 GN=Bamb_4951 PE=4 SV=1 - [Q0B5S3_BURCM]	168.26	10.96	1	6	6	10	657	73.2919	6.04932
Q0B205	Antibiotic biosynthesis monooxygenase OS=Burkholderia ambifaria (strain ATCC BAA-244 / AMMD) OX=339670 GN=Bamb_6274 PE=4 SV=1 - [Q0B205_BURCM]	167.44	42.86	1	5	5	11	119	13.5038	8.25049
Q0BJP2	Transcriptional regulator, AsnC family OS=Burkholderia ambifaria (strain ATCC BAA-244 / AMMD) OX=339670 GN=Bamb_0070 PE=4 SV=1 - [Q0BJP2_BURCM]	166.88	48.45	1	4	4	5	161	17.7686	7.13721
Q0BE15	30S ribosomal protein S2 OS=Burkholderia ambifaria (strain ATCC BAA-244 / AMMD) OX=339670 GN=rpsB PE=3 SV=1 - [RS2_BURCM]	166.58	18.7	1	4	4	6	246	27.082	7.6499
Q0B578	Oxidoreductase, molybdopterin binding protein OS=Burkholderia ambifaria (strain ATCC BAA-244 / AMMD) OX=339670 GN=Bamb_5146 PE=4 SV=1 - [Q0B578_BURCM]	166.54	27.71	1	4	4	7	166	18.2944	8.104
Q0BFV2	RNA-binding protein Hfq OS=Burkholderia ambifaria (strain ATCC BAA-244 / AMMD) OX=339670 GN=hfq PE=3 SV=1 - [Q0BFV2_BURCM]	166.51	33.16	1	5	5	8	196	20.9454	9.90576
Q0BAT5	Peptide deformylase OS=Burkholderia ambifaria (strain ATCC BAA-244 / AMMD) OX=339670 GN=def PE=3 SV=1 - [Q0BAT5_BURCM]	164.48	46.11	1	7	7	11	167	19.1859	5.61768
Q0B7W4	Uncharacterized protein OS=Burkholderia ambifaria (strain ATCC BAA-244 / AMMD) OX=339670 GN=Bamb_4206 PE=4 SV=1 - [Q0B7W4_BURCM]	164.22	20.86	1	3	3	6	163	18.2299	4.85596
Q0BAY6	Diaminopimelate epimerase OS=Burkholderia ambifaria (strain ATCC BAA-244 / AMMD) OX=339670 GN=dapF PE=3 SV=1 - [DAPF_BURCM]	163.76	24.57	1	4	4	7	289	30.8346	5.80811
Q0BAU4	7-carboxy-7-deazaguanine synthase OS=Burkholderia ambifaria (strain ATCC BAA-244 / AMMD) OX=339670 GN=queE PE=3 SV=1 - [Q0BAU4_BURCM]	162.86	41.43	1	7	7	10	210	23.2785	4.99561
Q0BEZ5	Ribosomal protein S12 methylthiotransferase RimO OS=Burkholderia ambifaria (strain ATCC BAA-244 / AMMD) OX=339670 GN=rimO PE=3 SV=1 - [RIMO_BURCM]	162.01	19.43	1	5	5	7	453	49.4303	5.40186
Q0B9U0	Uncharacterized protein OS=Burkholderia ambifaria (strain ATCC BAA-244 / AMMD) OX=339670 GN=Bamb_3529 PE=4 SV=1 - [Q0B9U0_BURCM]	162	42.54	1	3	3	6	134	15.1169	4.29736
Q0BGY1	Uncharacterized protein OS=Burkholderia ambifaria (strain ATCC BAA-244 / AMMD) OX=339670 GN=Bamb_1033 PE=4 SV=1 - [Q0BGY1_BURCM]	161.99	28.77	1	4	4	9	146	15.6701	8.14795
Q0BHC8	Amidase OS=Burkholderia ambifaria (strain ATCC BAA-244 / AMMD) OX=339670 GN=Bamb_0886 PE=3 SV=1 - [Q0BHC8_BURCM]	161.9	14.85	1	4	4	7	458	47.4537	6.25244
Q0BCT7	dCTP deaminase OS=Burkholderia ambifaria (strain ATCC BAA-244 / AMMD) OX=339670 GN=dcd PE=3 SV=1 - [DCD_BURCM]	161.7	20.11	1	3	3	5	189	21.3426	5.2749
Q0B2X3	OsmC family protein OS=Burkholderia ambifaria (strain ATCC BAA-244 / AMMD) OX=339670 GN=Bamb_5955 PE=4 SV=1 - [Q0B2X3_BURCM]	161.55	19.86	1	3	3	6	141	14.5686	6.53662
Q0B8U0	Isocitrate lyase OS=Burkholderia ambifaria (strain ATCC BAA-244 / AMMD) OX=339670 GN=Bamb_3879 PE=4 SV=1 - [Q0B8U0_BURCM]	161.49	21.78	1	8	8	12	528	58.3252	6.16357
Q0BBD9	Uncharacterized protein OS=Burkholderia ambifaria (strain ATCC BAA-244 / AMMD) OX=339670 GN=Bamb_2978 PE=4 SV=1 - [Q0BBD9_BURCM]	161.35	31.72	1	4	4	6	145	16.0008	7.34229
Q0BDS7	Transferase hexapeptide repeat containing protein OS=Burkholderia ambifaria (strain ATCC BAA-244 / AMMD) OX=339670 GN=Bamb_2140 PE=4 SV=1 - [Q0BDS7_BURCM]	160.91	21.26	1	2	2	4	174	18.2306	6.07471
Q0BBQ2	Histidinol-phosphate aminotransferase OS=Burkholderia ambifaria (strain ATCC BAA-244 / AMMD) OX=339670 GN=hisC PE=3 SV=1 - [Q0BBQ2_BURCM]	159.86	7.89	1	2	2	3	355	39.0112	6.46826
Q0B355	Type II secretion system protein E OS=Burkholderia ambifaria (strain ATCC BAA-244 / AMMD) OX=339670 GN=Bamb_5872 PE=4 SV=1 - [Q0B355_BURCM]	159.54	12.84	1	4	4	6	366	41.0334	6.46826
Q0BCY7	Short-chain dehydrogenase/reductase SDR OS=Burkholderia ambifaria (strain ATCC BAA-244 / AMMD) OX=339670 GN=Bamb_2430 PE=3 SV=1 - [Q0BCY7_BURCM]	157.51	29.27	1	4	5	8	246	24.8379	6.55127
Q0BHR0	dTDP-4-dehydrorhamnose reductase OS=Burkholderia ambifaria (strain ATCC BAA-244 / AMMD) OX=339670 GN=Bamb_0754 PE=3 SV=1 - [Q0BHR0_BURCM]	157.19	27.18	1	5	5	8	298	32.0875	7.09326
Q0BB95	Uncharacterized protein OS=Burkholderia ambifaria (strain ATCC BAA-244 / AMMD) OX=339670 GN=Bamb_3022 PE=4 SV=1 - [Q0BB95_BURCM]	156.76	35.62	1	2	2	4	73	8.21287	4.79248
Q0BBQ1	4Fe-4S ferredoxin, iron-sulfur binding domain protein OS=Burkholderia ambifaria (strain ATCC BAA-244 / AMMD) OX=339670 GN=Bamb_2866 PE=4 SV=1 - [Q0BBQ1_BURCM]	156.65	93.18	1	4	4	7	88	9.67321	4.41162
Q0BIF8	Acetyl-CoA carboxylase, biotin carboxylase OS=Burkholderia ambifaria (strain ATCC BAA-244 / AMMD) OX=339670 GN=Bamb_0506 PE=4 SV=1 - [Q0BIF8_BURCM]	155.88	18.02	1	5	5	10	455	50.5537	6.84424
Q0BBF0	Uncharacterized protein OS=Burkholderia ambifaria (strain ATCC BAA-244 / AMMD) OX=339670 GN=Bamb_2967 PE=4 SV=1 - [Q0BBF0_BURCM]	155.37	58.88	1	5	5	10	107	11.821	6.06201
Q0BFY7	Segregation and condensation protein B OS=Burkholderia ambifaria (strain ATCC BAA-244 / AMMD) OX=339670 GN=Bamb_1378 PE=3 SV=1 - [Q0BFY7_BURCM]	155.33	18.53	1	4	4	7	340	36.185	4.48779
Q0BIZ3	Uncharacterized protein OS=Burkholderia ambifaria (strain ATCC BAA-244 / AMMD) OX=339670 GN=Bamb_0320 PE=4 SV=1 - [Q0BIZ3_BURCM]	155.16	48.52	1	9	9	14	237	27.4923	9.62744
Q0BI58	YceI family protein OS=Burkholderia ambifaria (strain ATCC BAA-244 / AMMD) OX=339670 GN=Bamb_0606 PE=3 SV=1 - [Q0BI58_BURCM]	154.84	17.74	1	2	2	5	186	19.523	9.34912
Q0BHR3	dTDP-glucose 4,6-dehydratase OS=Burkholderia ambifaria (strain ATCC BAA-244 / AMMD) OX=339670 GN=Bamb_0751 PE=3 SV=1 - [Q0BHR3_BURCM]	154.8	22.1	1	4	4	9	353	39.1946	6.354
Q0BBX7	N-acyl-D-amino-acid deacylase OS=Burkholderia ambifaria (strain ATCC BAA-244 / AMMD) OX=339670 GN=Bamb_2790 PE=4 SV=1 - [Q0BBX7_BURCM]	153.25	9.33	1	3	3	5	493	52.5235	5.65576
Q0BBH3	Hydrolase of the alpha/beta superfamily-like protein OS=Burkholderia ambifaria (strain ATCC BAA-244 / AMMD) OX=339670 GN=Bamb_2944 PE=4 SV=1 - [Q0BBH3_BURCM]	153.15	18.22	1	3	3	5	214	23.1662	6.68311
Q0B632	2-methylisocitrate lyase OS=Burkholderia ambifaria (strain ATCC BAA-244 / AMMD) OX=339670 GN=prpB PE=3 SV=1 - [Q0B632_BURCM]	152.94	17.17	1	3	3	7	297	32.0814	5.57959
Q0BIT4	Tetratricopeptide TPR_2 repeat protein OS=Burkholderia ambifaria (strain ATCC BAA-244 / AMMD) OX=339670 GN=Bamb_0380 PE=4 SV=1 - [Q0BIT4_BURCM]	152.91	38.21	1	5	5	8	212	22.0395	9.29053
Q0B6T8	3-methylcrotonoyl-CoA carboxylase, alpha subunit OS=Burkholderia ambifaria (strain ATCC BAA-244 / AMMD) OX=339670 GN=Bamb_4585 PE=4 SV=1 - [Q0B6T8_BURCM]	152.1	9.31	1	4	4	6	666	70.7788	5.80811
Q0BJ42	30S ribosomal protein S19 OS=Burkholderia ambifaria (strain ATCC BAA-244 / AMMD) OX=339670 GN=rpsS PE=3 SV=1 - [RS19_BURCM]	151.7	36.26	1	2	2	5	91	10.1015	10.3745
Q0B1K0	Aspartate racemase OS=Burkholderia ambifaria (strain ATCC BAA-244 / AMMD) OX=339670 GN=Bamb_6429 PE=3 SV=1 - [Q0B1K0_BURCM]	151.44	30.34	1	4	4	6	234	25.6693	5.46533
Q0B4I8	Amino acid adenylation domain protein OS=Burkholderia ambifaria (strain ATCC BAA-244 / AMMD) OX=339670 GN=Bamb_5388 PE=3 SV=1 - [Q0B4I8_BURCM]	151.22	14.04	1	8	8	11	997	109.554	6.12549
Q0B626	Uncharacterized protein OS=Burkholderia ambifaria (strain ATCC BAA-244 / AMMD) OX=339670 GN=Bamb_4848 PE=4 SV=1 - [Q0B626_BURCM]	151	16.39	1	3	3	5	183	20.4084	5.09717
Q0BAN9	Molybdenum ABC transporter, periplasmic molybdate-binding protein OS=Burkholderia ambifaria (strain ATCC BAA-244 / AMMD) OX=339670 GN=Bamb_3228 PE=4 SV=1 - [Q0BAN9_BURCM]	150.99	52.08	1	7	7	11	265	27.6667	9.5249
Q0B8F9	Uncharacterized protein OS=Burkholderia ambifaria (strain ATCC BAA-244 / AMMD) OX=339670 GN=Bamb_4011 PE=4 SV=1 - [Q0B8F9_BURCM]	150.89	39.09	1	3	3	6	110	11.3037	8.76318
Q0BGH1	Uncharacterized protein OS=Burkholderia ambifaria (strain ATCC BAA-244 / AMMD) OX=339670 GN=Bamb_1194 PE=4 SV=1 - [Q0BGH1_BURCM]	149.5	21.03	1	3	3	6	195	21.5469	4.70361
Q0B6Q2	Adenosine deaminase OS=Burkholderia ambifaria (strain ATCC BAA-244 / AMMD) OX=339670 GN=Bamb_4621 PE=1 SV=1 - [Q0B6Q2_BURCM]	149.44	12.02	1	3	3	7	366	40.9906	6.07471
Q0B441	Uncharacterized protein OS=Burkholderia ambifaria (strain ATCC BAA-244 / AMMD) OX=339670 GN=Bamb_5535 PE=4 SV=1 - [Q0B441_BURCM]	149.4	20.16	1	2	2	5	129	14.0483	6.96143
Q0BAE5	Glutathione S-transferase, C-terminal domain protein OS=Burkholderia ambifaria (strain ATCC BAA-244 / AMMD) OX=339670 GN=Bamb_3323 PE=4 SV=1 - [Q0BAE5_BURCM]	149.39	14.94	1	3	3	6	241	27.2969	6.45557
Q0BC12	D,D-heptose 1,7-bisphosphate phosphatase OS=Burkholderia ambifaria (strain ATCC BAA-244 / AMMD) OX=339670 GN=Bamb_2755 PE=3 SV=1 - [Q0BC12_BURCM]	148.02	29.41	1	4	4	9	187	20.3384	7.00537
Q0BJ51	30S ribosomal protein S12 OS=Burkholderia ambifaria (strain ATCC BAA-244 / AMMD) OX=339670 GN=rpsL PE=3 SV=1 - [RS12_BURCM]	147.66	14.29	1	2	2	4	126	13.9906	10.9019
Q0BD64	UPF0176 protein Bamb_2353 OS=Burkholderia ambifaria (strain ATCC BAA-244 / AMMD) OX=339670 GN=Bamb_2353 PE=3 SV=1 - [Y2353_BURCM]	146.88	22.54	1	5	5	6	284	31.4729	5.88428
Q0BIR7	Peptidase M1, membrane alanine aminopeptidase OS=Burkholderia ambifaria (strain ATCC BAA-244 / AMMD) OX=339670 GN=Bamb_0397 PE=4 SV=1 - [Q0BIR7_BURCM]	146.14	11.63	1	6	6	8	722	78.5122	5.8208
Q0BBK4	Carboxyl-terminal protease OS=Burkholderia ambifaria (strain ATCC BAA-244 / AMMD) OX=339670 GN=Bamb_2913 PE=3 SV=1 - [Q0BBK4_BURCM]	145.45	12.09	1	5	5	7	513	56.1863	9.02686
Q0BJP6	Two component transcriptional regulator, winged helix family OS=Burkholderia ambifaria (strain ATCC BAA-244 / AMMD) OX=339670 GN=Bamb_0066 PE=4 SV=1 - [Q0BJP6_BURCM]	144.08	32.61	1	4	4	6	230	25.9597	6.7417
Q0B6T6	Propionyl-CoA carboxylase OS=Burkholderia ambifaria (strain ATCC BAA-244 / AMMD) OX=339670 GN=Bamb_4587 PE=4 SV=1 - [Q0B6T6_BURCM]	143.47	9.35	1	4	4	7	535	57.4864	7.12256
Q0B9B8	NADH:flavin oxidoreductase/NADH oxidase OS=Burkholderia ambifaria (strain ATCC BAA-244 / AMMD) OX=339670 GN=Bamb_3701 PE=4 SV=1 - [Q0B9B8_BURCM]	143.32	16.53	1	4	4	6	369	40.2555	6.41748
Q0BIV5	Uncharacterized protein OS=Burkholderia ambifaria (strain ATCC BAA-244 / AMMD) OX=339670 GN=Bamb_0358 PE=4 SV=1 - [Q0BIV5_BURCM]	141.97	16.13	1	3	3	6	248	27.3569	5.56689
Q0B881	Oxidoreductase FAD/NAD(P)-binding domain protein OS=Burkholderia ambifaria (strain ATCC BAA-244 / AMMD) OX=339670 GN=Bamb_4089 PE=4 SV=1 - [Q0B881_BURCM]	141.79	32.06	1	6	6	9	340	37.0058	5.05908
Q0BGM4	Heat shock protein Hsp20 OS=Burkholderia ambifaria (strain ATCC BAA-244 / AMMD) OX=339670 GN=Bamb_1141 PE=3 SV=1 - [Q0BGM4_BURCM]	141.65	36.69	1	4	4	6	139	15.4451	7.54736
Q0BIW6	Imidazole glycerol phosphate synthase subunit HisH OS=Burkholderia ambifaria (strain ATCC BAA-244 / AMMD) OX=339670 GN=hisH PE=3 SV=1 - [Q0BIW6_BURCM]	141.43	20.19	1	3	3	7	213	23.3918	6.68311
Q0B7Z1	Short-chain dehydrogenase/reductase SDR OS=Burkholderia ambifaria (strain ATCC BAA-244 / AMMD) OX=339670 GN=Bamb_4179 PE=3 SV=1 - [Q0B7Z1_BURCM]	140.76	37.13	1	5	5	7	237	24.1166	5.64307
Q0BD48	Cytochrome c, class I OS=Burkholderia ambifaria (strain ATCC BAA-244 / AMMD) OX=339670 GN=Bamb_2369 PE=4 SV=1 - [Q0BD48_BURCM]	140.43	23.53	1	2	2	4	119	12.8635	8.01611
Q0BGJ3	Uncharacterized protein OS=Burkholderia ambifaria (strain ATCC BAA-244 / AMMD) OX=339670 GN=Bamb_1172 PE=4 SV=1 - [Q0BGJ3_BURCM]	140.32	34.86	1	5	5	7	175	18.9566	10.8286
Q0B567	Pyruvate dehydrogenase (Cytochrome) OS=Burkholderia ambifaria (strain ATCC BAA-244 / AMMD) OX=339670 GN=Bamb_5157 PE=3 SV=1 - [Q0B567_BURCM]	140.28	21.47	1	8	8	12	573	61.1373	6.45557
Q0BEH8	Isochorismatase hydrolase OS=Burkholderia ambifaria (strain ATCC BAA-244 / AMMD) OX=339670 GN=Bamb_1889 PE=4 SV=1 - [Q0BEH8_BURCM]	140.01	18.75	1	3	3	5	176	19.0371	7.02002
Q0BF69	Uncharacterized protein OS=Burkholderia ambifaria (strain ATCC BAA-244 / AMMD) OX=339670 GN=Bamb_1647 PE=4 SV=1 - [Q0BF69_BURCM]	139.66	27.22	1	4	4	8	180	19.3457	9.49561
Q0BBZ4	Transcriptional regulator, TetR family OS=Burkholderia ambifaria (strain ATCC BAA-244 / AMMD) OX=339670 GN=Bamb_2773 PE=4 SV=1 - [Q0BBZ4_BURCM]	139.55	20.6	1	4	4	6	199	22.6856	6.43018
Q0B9Z3	Uncharacterized protein OS=Burkholderia ambifaria (strain ATCC BAA-244 / AMMD) OX=339670 GN=Bamb_3476 PE=4 SV=1 - [Q0B9Z3_BURCM]	139.36	25.47	1	4	4	7	161	17.4438	6.20166
Q0BGC4	Uncharacterized protein OS=Burkholderia ambifaria (strain ATCC BAA-244 / AMMD) OX=339670 GN=Bamb_1241 PE=4 SV=1 - [Q0BGC4_BURCM]	138.87	13.08	1	2	2	4	260	27.4503	9.20264
Q0BG03	50S ribosomal protein L20 OS=Burkholderia ambifaria (strain ATCC BAA-244 / AMMD) OX=339670 GN=rplT PE=3 SV=1 - [RL20_BURCM]	138.69	35.29	1	4	4	10	119	13.6497	11.6636
Q0BDM3	Probable Fe(2+)-trafficking protein OS=Burkholderia ambifaria (strain ATCC BAA-244 / AMMD) OX=339670 GN=Bamb_2194 PE=3 SV=1 - [FETP_BURCM]	138.68	45.05	1	4	4	9	91	10.3181	6.66846
Q0B634	2-methylcitrate dehydratase (Trans-methylaconitate-forming) OS=Burkholderia ambifaria (strain ATCC BAA-244 / AMMD) OX=339670 GN=Bamb_4840 PE=4 SV=1 - [Q0B634_BURCM]	138.48	10.98	1	6	6	9	865	94.0272	5.51611
Q0BJI4	Thiamine pyrophosphate enzyme domain protein TPP-binding protein OS=Burkholderia ambifaria (strain ATCC BAA-244 / AMMD) OX=339670 GN=Bamb_0128 PE=3 SV=1 - [Q0BJI4_BURCM]	137.39	21.34	1	7	7	10	567	60.9371	6.93213
Q0BHE3	Uncharacterized protein OS=Burkholderia ambifaria (strain ATCC BAA-244 / AMMD) OX=339670 GN=Bamb_0871 PE=4 SV=1 - [Q0BHE3_BURCM]	137.34	8.59	1	2	2	3	419	44.9774	6.87354
Q0BEQ8	30S ribosomal protein S18 OS=Burkholderia ambifaria (strain ATCC BAA-244 / AMMD) OX=339670 GN=rpsR PE=3 SV=1 - [RS18_BURCM]	136.71	38.46	1	3	4	6	91	10.6187	10.2866
Q0B8A6	Cold-shock DNA-binding protein family OS=Burkholderia ambifaria (strain ATCC BAA-244 / AMMD) OX=339670 GN=Bamb_4064 PE=4 SV=1 - [Q0B8A6_BURCM]	136.09	43.28	1	1	2	4	67	7.34268	5.97314
Q0BC96	N5-carboxyaminoimidazole ribonucleotide mutase OS=Burkholderia ambifaria (strain ATCC BAA-244 / AMMD) OX=339670 GN=purE PE=3 SV=1 - [Q0BC96_BURCM]	135.58	60.69	1	6	6	10	173	17.9933	7.6792
Q0B6T7	Enoyl-CoA hydratase/isomerase OS=Burkholderia ambifaria (strain ATCC BAA-244 / AMMD) OX=339670 GN=Bamb_4586 PE=4 SV=1 - [Q0B6T7_BURCM]	135.26	9.96	1	2	2	3	261	27.8594	6.16357
Q0BHX2	Uncharacterized protein OS=Burkholderia ambifaria (strain ATCC BAA-244 / AMMD) OX=339670 GN=Bamb_0692 PE=4 SV=1 - [Q0BHX2_BURCM]	134.17	22	1	2	2	4	100	10.8368	8.96826
Q0BJ36	50S ribosomal protein L14 OS=Burkholderia ambifaria (strain ATCC BAA-244 / AMMD) OX=339670 GN=rplN PE=3 SV=1 - [RL14_BURCM]	133.86	31.97	1	4	4	8	122	13.4294	10.272
Q0BDY3	Malate synthase OS=Burkholderia ambifaria (strain ATCC BAA-244 / AMMD) OX=339670 GN=Bamb_2084 PE=3 SV=1 - [Q0BDY3_BURCM]	133.46	11.32	1	4	4	7	530	59.0744	6.29053
Q0B9T3	Sugar nucleotidyltransferase-like protein OS=Burkholderia ambifaria (strain ATCC BAA-244 / AMMD) OX=339670 GN=Bamb_3536 PE=4 SV=1 - [Q0B9T3_BURCM]	133.26	29.41	1	5	5	8	255	28.0276	4.86865
Q0BBK8	Protein-export protein SecB OS=Burkholderia ambifaria (strain ATCC BAA-244 / AMMD) OX=339670 GN=secB PE=3 SV=1 - [SECB_BURCM]	132.48	33.33	1	3	3	4	159	17.49	4.61475
Q0BG09	Alpha/beta hydrolase fold protein OS=Burkholderia ambifaria (strain ATCC BAA-244 / AMMD) OX=339670 GN=Bamb_1356 PE=4 SV=1 - [Q0BG09_BURCM]	131.8	9.76	1	2	2	3	297	32.5867	5.69385
Q0BDQ7	Co-chaperone protein HscB homolog OS=Burkholderia ambifaria (strain ATCC BAA-244 / AMMD) OX=339670 GN=hscB PE=3 SV=1 - [Q0BDQ7_BURCM]	131.61	26.37	1	3	3	6	201	22.5366	5.71924
Q0BIM6	Anthranilate synthase, component II OS=Burkholderia ambifaria (strain ATCC BAA-244 / AMMD) OX=339670 GN=Bamb_0438 PE=4 SV=1 - [Q0BIM6_BURCM]	131.46	39.2	1	4	4	7	199	21.955	5.8335
Q0B2J8	Uncharacterized protein OS=Burkholderia ambifaria (strain ATCC BAA-244 / AMMD) OX=339670 GN=Bamb_6081 PE=4 SV=1 - [Q0B2J8_BURCM]	130.92	18.42	1	2	2	5	152	16.9385	6.37939
Q0BJ19	50S ribosomal protein L17 OS=Burkholderia ambifaria (strain ATCC BAA-244 / AMMD) OX=339670 GN=rplQ PE=3 SV=1 - [RL17_BURCM]	129.41	14.5	1	3	3	6	131	15.0402	10.6675
Q0BAQ6	Uncharacterized protein OS=Burkholderia ambifaria (strain ATCC BAA-244 / AMMD) OX=339670 GN=Bamb_3211 PE=4 SV=1 - [Q0BAQ6_BURCM]	127.12	36.36	1	2	2	4	99	10.4322	4.4751
Q0BEZ2	Uncharacterized protein OS=Burkholderia ambifaria (strain ATCC BAA-244 / AMMD) OX=339670 GN=Bamb_1725 PE=4 SV=1 - [Q0BEZ2_BURCM]	126.63	34.07	1	2	2	3	91	9.76791	8.49951
Q0BAX8	ATP-dependent protease ATPase subunit HslU OS=Burkholderia ambifaria (strain ATCC BAA-244 / AMMD) OX=339670 GN=hslU PE=3 SV=1 - [HSLU_BURCM]	125.97	10.74	1	4	4	5	447	49.73	5.42725
Q0BBU1	Cobyrinic acid a,c-diamide synthase OS=Burkholderia ambifaria (strain ATCC BAA-244 / AMMD) OX=339670 GN=Bamb_2826 PE=4 SV=1 - [Q0BBU1_BURCM]	125.55	15.35	1	2	2	3	254	28.3427	5.60498
Q0BCZ8	Uncharacterized protein OS=Burkholderia ambifaria (strain ATCC BAA-244 / AMMD) OX=339670 GN=Bamb_2419 PE=4 SV=1 - [Q0BCZ8_BURCM]	125.4	29.89	1	3	3	5	184	20.7013	5.98584
Q0B2L9	Uncharacterized protein OS=Burkholderia ambifaria (strain ATCC BAA-244 / AMMD) OX=339670 GN=Bamb_6060 PE=4 SV=1 - [Q0B2L9_BURCM]	125.09	15.53	1	3	3	6	219	24.4389	6.56592
Q0BHE7	Chorismate mutase OS=Burkholderia ambifaria (strain ATCC BAA-244 / AMMD) OX=339670 GN=Bamb_0867 PE=4 SV=1 - [Q0BHE7_BURCM]	124.99	32.99	1	5	5	9	197	20.7839	8.93896
Q0BJP9	NADH:flavin oxidoreductase/NADH oxidase OS=Burkholderia ambifaria (strain ATCC BAA-244 / AMMD) OX=339670 GN=Bamb_0063 PE=4 SV=1 - [Q0BJP9_BURCM]	124.68	17.3	1	4	4	6	370	40.0054	6.63916
Q0BF07	Uncharacterized protein OS=Burkholderia ambifaria (strain ATCC BAA-244 / AMMD) OX=339670 GN=Bamb_1710 PE=4 SV=1 - [Q0BF07_BURCM]	123.14	23.33	1	3	3	6	150	16.4812	5.2749
Q0B5P8	Tartrate dehydrogenase OS=Burkholderia ambifaria (strain ATCC BAA-244 / AMMD) OX=339670 GN=Bamb_4976 PE=4 SV=1 - [Q0B5P8_BURCM]	121.98	10.25	1	3	3	5	361	39.604	5.38916
Q0BDQ6	Iron-sulfur cluster assembly protein IscA OS=Burkholderia ambifaria (strain ATCC BAA-244 / AMMD) OX=339670 GN=Bamb_2161 PE=3 SV=1 - [Q0BDQ6_BURCM]	121.91	19.67	1	2	2	4	122	13.4418	7.78174
Q0BDA5	Cytokinin riboside 5'-monophosphate phosphoribohydrolase OS=Burkholderia ambifaria (strain ATCC BAA-244 / AMMD) OX=339670 GN=Bamb_2312 PE=3 SV=1 - [Q0BDA5_BURCM]	121.84	25.26	1	3	3	5	194	21.1137	5.57959
Q0B846	Uncharacterized protein OS=Burkholderia ambifaria (strain ATCC BAA-244 / AMMD) OX=339670 GN=Bamb_4124 PE=4 SV=1 - [Q0B846_BURCM]	120.76	53.21	1	2	2	3	109	11.5938	5.31299
Q0BB80	Gamma-glutamyl-gamma-aminobutyraldehyde dehydrogenase OS=Burkholderia ambifaria (strain ATCC BAA-244 / AMMD) OX=339670 GN=Bamb_3037 PE=3 SV=1 - [Q0BB80_BURCM]	120.48	7.86	1	3	3	5	496	52.7412	5.49072
Q0B683	Histidine triad (HIT) protein OS=Burkholderia ambifaria (strain ATCC BAA-244 / AMMD) OX=339670 GN=Bamb_4791 PE=4 SV=1 - [Q0B683_BURCM]	119.76	23.74	1	2	2	4	139	14.9507	6.06201
Q0BID1	Guanine-specific ribonuclease N1 and T1 OS=Burkholderia ambifaria (strain ATCC BAA-244 / AMMD) OX=339670 GN=Bamb_0533 PE=4 SV=1 - [Q0BID1_BURCM]	119.48	23.78	1	2	2	5	143	15.6711	9.99365
Q0BC21	tRNA-2-methylthio-N(6)-dimethylallyladenosine synthase OS=Burkholderia ambifaria (strain ATCC BAA-244 / AMMD) OX=339670 GN=miaB PE=3 SV=1 - [MIAB_BURCM]	119.42	15.32	1	5	5	7	457	50.752	6.37939
Q0BEB8	Probable allantoicase OS=Burkholderia ambifaria (strain ATCC BAA-244 / AMMD) OX=339670 GN=alc PE=3 SV=1 - [Q0BEB8_BURCM]	119.17	17.51	1	4	4	7	337	37.2226	6.0874
Q0BJ29	30S ribosomal protein S5 OS=Burkholderia ambifaria (strain ATCC BAA-244 / AMMD) OX=339670 GN=rpsE PE=3 SV=1 - [RS5_BURCM]	119.05	30.81	1	5	5	7	172	18.0647	10.2866
Q0BCH3	UPF0434 protein Bamb_2594 OS=Burkholderia ambifaria (strain ATCC BAA-244 / AMMD) OX=339670 GN=Bamb_2594 PE=3 SV=1 - [Y2594_BURCM]	118.82	50.75	1	3	3	5	67	7.18364	4.77979
Q0B4I9	Alcohol dehydrogenase, zinc-binding domain protein OS=Burkholderia ambifaria (strain ATCC BAA-244 / AMMD) OX=339670 GN=Bamb_5387 PE=4 SV=1 - [Q0B4I9_BURCM]	118.74	22.8	1	4	4	6	329	34.6221	6.354
Q0BHJ6	3,4-dihydroxy-2-butanone 4-phosphate synthase OS=Burkholderia ambifaria (strain ATCC BAA-244 / AMMD) OX=339670 GN=ribB PE=3 SV=1 - [Q0BHJ6_BURCM]	117.97	8.68	1	3	3	6	380	41.1101	5.87158
Q0B2M9	Acyl carrier protein OS=Burkholderia ambifaria (strain ATCC BAA-244 / AMMD) OX=339670 GN=Bamb_6050 PE=4 SV=1 - [Q0B2M9_BURCM]	116.45	36.59	1	3	3	6	82	8.88247	4.48779
Q0BGI0	Ppx/GppA phosphatase OS=Burkholderia ambifaria (strain ATCC BAA-244 / AMMD) OX=339670 GN=Bamb_1185 PE=4 SV=1 - [Q0BGI0_BURCM]	116.31	12.3	1	3	4	5	504	54.9214	6.49365
Q0BIC8	Glyoxalase/bleomycin resistance protein/dioxygenase OS=Burkholderia ambifaria (strain ATCC BAA-244 / AMMD) OX=339670 GN=Bamb_0536 PE=4 SV=1 - [Q0BIC8_BURCM]	116.01	44.93	1	4	4	7	138	15.3484	4.81787
Q0BFM5	Uncharacterized protein OS=Burkholderia ambifaria (strain ATCC BAA-244 / AMMD) OX=339670 GN=Bamb_1490 PE=4 SV=1 - [Q0BFM5_BURCM]	115.56	31.43	1	3	3	4	140	15.2408	4.67822
Q0BIT2	Uncharacterized protein OS=Burkholderia ambifaria (strain ATCC BAA-244 / AMMD) OX=339670 GN=Bamb_0382 PE=4 SV=1 - [Q0BIT2_BURCM]	115.41	14.52	1	4	4	5	496	54.8366	5.37646
Q0BBU2	Phasin family protein OS=Burkholderia ambifaria (strain ATCC BAA-244 / AMMD) OX=339670 GN=Bamb_2825 PE=4 SV=1 - [Q0BBU2_BURCM]	114.91	19.17	1	2	2	4	193	19.9281	5.60498
Q0B6A6	Lipoprotein OS=Burkholderia ambifaria (strain ATCC BAA-244 / AMMD) OX=339670 GN=Bamb_4767 PE=3 SV=1 - [Q0B6A6_BURCM]	114.75	17.16	1	2	4	6	268	28.5563	9.18799
Q0B594	Pyridoxal-dependent decarboxylase OS=Burkholderia ambifaria (strain ATCC BAA-244 / AMMD) OX=339670 GN=Bamb_5130 PE=3 SV=1 - [Q0B594_BURCM]	114.59	8.44	1	4	4	6	450	47.7536	6.01123
Q0BAN1	Uncharacterized protein OS=Burkholderia ambifaria (strain ATCC BAA-244 / AMMD) OX=339670 GN=Bamb_3236 PE=4 SV=1 - [Q0BAN1_BURCM]	114.21	45.93	1	5	5	6	135	14.4524	9.34912
Q0BIB9	Outer membrane protein assembly factor BamE OS=Burkholderia ambifaria (strain ATCC BAA-244 / AMMD) OX=339670 GN=bamE PE=3 SV=1 - [Q0BIB9_BURCM]	114.02	17.74	1	3	3	5	265	27.2297	8.1626
Q0BIT3	Uncharacterized conserved protein UCP028301 OS=Burkholderia ambifaria (strain ATCC BAA-244 / AMMD) OX=339670 GN=Bamb_0381 PE=4 SV=1 - [Q0BIT3_BURCM]	114.02	29.82	1	5	5	10	171	19.2202	5.26221
Q0BI31	Nitrilase/cyanide hydratase and apolipoprotein N-acyltransferase OS=Burkholderia ambifaria (strain ATCC BAA-244 / AMMD) OX=339670 GN=Bamb_0633 PE=4 SV=1 - [Q0BI31_BURCM]	112.93	15.64	1	3	3	5	275	30.4824	6.62451
Q0BDL2	N-formylglutamate amidohydrolase OS=Burkholderia ambifaria (strain ATCC BAA-244 / AMMD) OX=339670 GN=Bamb_2205 PE=4 SV=1 - [Q0BDL2_BURCM]	111.98	36.6	1	5	5	6	265	29.2488	6.45557
Q0BBY3	Uncharacterized protein OS=Burkholderia ambifaria (strain ATCC BAA-244 / AMMD) OX=339670 GN=Bamb_2784 PE=4 SV=1 - [Q0BBY3_BURCM]	111.96	30.66	1	4	4	7	137	15.0004	5.97314
Q0BJ00	Deoxyguanosinetriphosphate triphosphohydrolase-like protein OS=Burkholderia ambifaria (strain ATCC BAA-244 / AMMD) OX=339670 GN=Bamb_0313 PE=3 SV=1 - [Q0BJ00_BURCM]	111.39	16.92	1	5	5	8	402	45.1852	6.78564
Q0BCL8	50S ribosomal protein L28 OS=Burkholderia ambifaria (strain ATCC BAA-244 / AMMD) OX=339670 GN=rpmB PE=3 SV=1 - [RL28_BURCM]	110.83	44.16	1	3	3	4	77	8.75562	11.5903
Q0BIN5	Ribosome-binding ATPase YchF OS=Burkholderia ambifaria (strain ATCC BAA-244 / AMMD) OX=339670 GN=ychF PE=3 SV=1 - [Q0BIN5_BURCM]	110.73	22.8	1	4	4	7	364	39.1922	5.0083
Q0BD61	Periplasmic protein OS=Burkholderia ambifaria (strain ATCC BAA-244 / AMMD) OX=339670 GN=Bamb_2356 PE=4 SV=1 - [Q0BD61_BURCM]	110.31	42.52	1	3	3	6	127	13.9061	9.12939
Q0BIX3	Transcriptional regulator, BolA protein family OS=Burkholderia ambifaria (strain ATCC BAA-244 / AMMD) OX=339670 GN=Bamb_0340 PE=3 SV=1 - [Q0BIX3_BURCM]	109.19	27.85	1	2	2	5	79	8.77145	6.93213
Q0B946	Uncharacterized protein OS=Burkholderia ambifaria (strain ATCC BAA-244 / AMMD) OX=339670 GN=Bamb_3773 PE=4 SV=1 - [Q0B946_BURCM]	109.14	18.66	1	2	2	4	134	14.4161	6.0874
Q0BI86	D-aminoacyl-tRNA deacylase OS=Burkholderia ambifaria (strain ATCC BAA-244 / AMMD) OX=339670 GN=dtd PE=3 SV=1 - [DTD_BURCM]	109.06	15.79	1	2	2	4	152	15.9733	5.2876
Q0B9H8	Transcriptional regulator, TraR/DksA family OS=Burkholderia ambifaria (strain ATCC BAA-244 / AMMD) OX=339670 GN=Bamb_3641 PE=4 SV=1 - [Q0B9H8_BURCM]	108.7	20.77	1	2	2	3	130	14.6301	5.09717
Q0B8T7	Pyridoxal-5'-phosphate-dependent enzyme, beta subunit OS=Burkholderia ambifaria (strain ATCC BAA-244 / AMMD) OX=339670 GN=Bamb_3882 PE=4 SV=1 - [Q0B8T7_BURCM]	108.67	29.01	1	5	5	7	324	34.5236	6.72705
Q0BDB4	Acetolactate synthase OS=Burkholderia ambifaria (strain ATCC BAA-244 / AMMD) OX=339670 GN=Bamb_2303 PE=3 SV=1 - [Q0BDB4_BURCM]	107.74	15.67	1	5	5	9	587	64.8958	6.13818
Q0BDE8	Acyl-CoA dehydrogenase domain protein OS=Burkholderia ambifaria (strain ATCC BAA-244 / AMMD) OX=339670 GN=Bamb_2269 PE=3 SV=1 - [Q0BDE8_BURCM]	107.33	18.04	1	4	4	5	377	40.2276	5.80811
Q0BC41	Gamma-glutamyltransferase 2, Threonine peptidase, MEROPS family T03 OS=Burkholderia ambifaria (strain ATCC BAA-244 / AMMD) OX=339670 GN=Bamb_2726 PE=4 SV=1 - [Q0BC41_BURCM]	107.3	14.1	1	5	5	8	546	58.7104	6.53662
Q0BH60	Oligoribonuclease OS=Burkholderia ambifaria (strain ATCC BAA-244 / AMMD) OX=339670 GN=orn PE=3 SV=1 - [ORN_BURCM]	107.27	18.93	1	2	2	4	206	23.0584	5.80811
Q0B4Y5	Aldehyde dehydrogenase OS=Burkholderia ambifaria (strain ATCC BAA-244 / AMMD) OX=339670 GN=Bamb_5240 PE=4 SV=1 - [Q0B4Y5_BURCM]	107.01	8.3	1	3	3	5	542	59.4025	6.27783
Q0B451	OsmC family protein OS=Burkholderia ambifaria (strain ATCC BAA-244 / AMMD) OX=339670 GN=Bamb_5525 PE=4 SV=1 - [Q0B451_BURCM]	106.71	18.05	1	2	2	3	133	14.5695	6.93213
Q0BI89	Putative iron-sulfur cluster insertion protein ErpA OS=Burkholderia ambifaria (strain ATCC BAA-244 / AMMD) OX=339670 GN=erpA PE=3 SV=1 - [ERPA_BURCM]	106.55	30.89	1	2	2	3	123	13.2602	4.18311
Q0BHY9	Cell division coordinator CpoB OS=Burkholderia ambifaria (strain ATCC BAA-244 / AMMD) OX=339670 GN=cpoB PE=3 SV=1 - [Q0BHY9_BURCM]	106.35	24.1	1	4	4	6	249	27.3988	8.68994
Q0BIM2	Protein ApaG OS=Burkholderia ambifaria (strain ATCC BAA-244 / AMMD) OX=339670 GN=apaG PE=3 SV=1 - [Q0BIM2_BURCM]	106.21	20.97	1	2	2	4	124	14.059	5.97314
Q0B5T8	2-nitropropane dioxygenase, NPD OS=Burkholderia ambifaria (strain ATCC BAA-244 / AMMD) OX=339670 GN=Bamb_4936 PE=4 SV=1 - [Q0B5T8_BURCM]	106.11	16.06	1	5	5	5	492	52.2352	5.5542
Q0B2V9	Short-chain dehydrogenase/reductase SDR OS=Burkholderia ambifaria (strain ATCC BAA-244 / AMMD) OX=339670 GN=Bamb_5970 PE=3 SV=1 - [Q0B2V9_BURCM]	106.07	17.25	1	3	3	4	255	26.2916	5.97314
Q0B127	ParB-like partition proteins OS=Burkholderia ambifaria (strain ATCC BAA-244 / AMMD) OX=339670 GN=Bamb_6603 PE=3 SV=1 - [Q0B127_BURCM]	105.36	22.92	1	5	5	7	349	38.1165	5.08447
Q0BAX9	ATP-dependent protease subunit HslV OS=Burkholderia ambifaria (strain ATCC BAA-244 / AMMD) OX=339670 GN=hslV PE=3 SV=1 - [HSLV_BURCM]	105.34	15.73	1	2	2	3	178	19.1309	6.34131
Q0B3F6	3-hydroxyacyl-CoA dehydrogenase OS=Burkholderia ambifaria (strain ATCC BAA-244 / AMMD) OX=339670 GN=Bamb_5770 PE=4 SV=1 - [Q0B3F6_BURCM]	104.94	7.75	1	2	2	3	284	29.6878	5.75732
Q0BDL0	Imidazolonepropionase OS=Burkholderia ambifaria (strain ATCC BAA-244 / AMMD) OX=339670 GN=hutI PE=3 SV=1 - [HUTI_BURCM]	104.77	9.09	1	2	2	4	407	44.1426	6.13818
Q0BHY8	Peptidoglycan-associated protein OS=Burkholderia ambifaria (strain ATCC BAA-244 / AMMD) OX=339670 GN=pal PE=3 SV=1 - [Q0BHY8_BURCM]	104.42	21.3	1	2	2	3	169	18.5802	7.50342
Q0B6Q3	Uncharacterized protein OS=Burkholderia ambifaria (strain ATCC BAA-244 / AMMD) OX=339670 GN=Bamb_4620 PE=4 SV=1 - [Q0B6Q3_BURCM]	104.33	20.71	1	2	2	3	140	14.4503	5.22412
Q0BC79	Glycosyl hydrolase, BNR repeat-containing protein OS=Burkholderia ambifaria (strain ATCC BAA-244 / AMMD) OX=339670 GN=Bamb_2688 PE=4 SV=1 - [Q0BC79_BURCM]	104.19	11.11	1	4	4	6	396	44.1458	5.85889
Q0BJQ0	Glutamine amidotransferase class-I OS=Burkholderia ambifaria (strain ATCC BAA-244 / AMMD) OX=339670 GN=Bamb_0062 PE=4 SV=1 - [Q0BJQ0_BURCM]	103.95	17.37	1	3	3	4	236	25.4971	6.52197
Q0BCE6	Selenium-binding protein OS=Burkholderia ambifaria (strain ATCC BAA-244 / AMMD) OX=339670 GN=Bamb_2621 PE=4 SV=1 - [Q0BCE6_BURCM]	103.3	8.12	1	4	4	6	468	52.3768	5.71924
Q0BBI0	Lipoyl synthase OS=Burkholderia ambifaria (strain ATCC BAA-244 / AMMD) OX=339670 GN=lipA PE=3 SV=1 - [Q0BBI0_BURCM]	103.28	21.52	1	4	4	5	330	36.4965	7.02002
Q0BA58	Antibiotic biosynthesis monooxygenase OS=Burkholderia ambifaria (strain ATCC BAA-244 / AMMD) OX=339670 GN=Bamb_3411 PE=4 SV=1 - [Q0BA58_BURCM]	103.04	21.62	1	2	2	4	111	12.5034	5.45264
Q0BBA9	YbaK/prolyl-tRNA synthetase associated region OS=Burkholderia ambifaria (strain ATCC BAA-244 / AMMD) OX=339670 GN=Bamb_3008 PE=4 SV=1 - [Q0BBA9_BURCM]	102.94	19.05	1	2	2	3	168	17.4002	6.68311
Q0B3C8	Cold-shock DNA-binding protein family OS=Burkholderia ambifaria (strain ATCC BAA-244 / AMMD) OX=339670 GN=Bamb_5798 PE=4 SV=1 - [Q0B3C8_BURCM]	102.91	32.84	1	2	2	4	67	7.21858	5.97314
Q0B6C8	Alkyl hydroperoxide reductase AhpD OS=Burkholderia ambifaria (strain ATCC BAA-244 / AMMD) OX=339670 GN=Bamb_4745 PE=3 SV=1 - [Q0B6C8_BURCM]	102.19	20.83	1	3	3	5	192	21.3117	6.53662
Q0B9G4	5-carboxymethyl-2-hydroxymuconate semialdehyde dehydrogenase OS=Burkholderia ambifaria (strain ATCC BAA-244 / AMMD) OX=339670 GN=Bamb_3655 PE=3 SV=1 - [Q0B9G4_BURCM]	102.04	6.16	1	2	2	2	487	53.068	6.29053
Q0BHJ3	Riboflavin biosynthesis protein RibD OS=Burkholderia ambifaria (strain ATCC BAA-244 / AMMD) OX=339670 GN=Bamb_0821 PE=3 SV=1 - [Q0BHJ3_BURCM]	101.16	11.26	1	2	3	4	373	39.5916	7.50342
Q0BH08	Periplasmic serine endoprotease DegP-like OS=Burkholderia ambifaria (strain ATCC BAA-244 / AMMD) OX=339670 GN=Bamb_1006 PE=3 SV=1 - [Q0BH08_BURCM]	100.85	6.01	1	2	2	3	499	52.1423	8.57275
Q0BJ40	30S ribosomal protein S3 OS=Burkholderia ambifaria (strain ATCC BAA-244 / AMMD) OX=339670 GN=rpsC PE=3 SV=1 - [RS3_BURCM]	99.6	16.92	1	3	3	4	266	29.9159	10.4917
Q0BHD1	Adenine deaminase OS=Burkholderia ambifaria (strain ATCC BAA-244 / AMMD) OX=339670 GN=Bamb_0883 PE=3 SV=1 - [Q0BHD1_BURCM]	98.63	12.9	1	4	4	6	341	37.6444	5.38916
Q0B769	Uncharacterized protein OS=Burkholderia ambifaria (strain ATCC BAA-244 / AMMD) OX=339670 GN=Bamb_4454 PE=4 SV=1 - [Q0B769_BURCM]	98.49	61	1	2	2	3	100	10.1911	7.41553
Q0BFQ7	NUDIX hydrolase OS=Burkholderia ambifaria (strain ATCC BAA-244 / AMMD) OX=339670 GN=Bamb_1458 PE=3 SV=1 - [Q0BFQ7_BURCM]	98.44	43.94	1	4	4	6	198	22.198	5.14795
Q0BEB2	Murein tetrapeptidase LD-carboxypeptidase, Serine peptidase, MEROPS family S66 OS=Burkholderia ambifaria (strain ATCC BAA-244 / AMMD) OX=339670 GN=Bamb_1955 PE=4 SV=1 - [Q0BEB2_BURCM]	98.19	21.15	1	6	6	10	312	34.2316	6.27783
Q0BIN3	Thiol:disulfide interchange protein OS=Burkholderia ambifaria (strain ATCC BAA-244 / AMMD) OX=339670 GN=Bamb_0431 PE=3 SV=1 - [Q0BIN3_BURCM]	97.99	31.82	1	6	6	7	242	25.7463	8.86572
Q0BG98	OsmC family protein OS=Burkholderia ambifaria (strain ATCC BAA-244 / AMMD) OX=339670 GN=Bamb_1267 PE=4 SV=1 - [Q0BG98_BURCM]	95.82	36.92	1	4	4	7	130	13.8282	5.97314
Q0B9D5	Rhodanese domain protein OS=Burkholderia ambifaria (strain ATCC BAA-244 / AMMD) OX=339670 GN=Bamb_3684 PE=4 SV=1 - [Q0B9D5_BURCM]	95.32	9.73	1	3	3	4	555	59.8718	5.52881
Q0B9U1	Uncharacterized protein OS=Burkholderia ambifaria (strain ATCC BAA-244 / AMMD) OX=339670 GN=Bamb_3528 PE=4 SV=1 - [Q0B9U1_BURCM]	95.23	20.28	1	5	5	8	281	30.1063	7.79639
Q0BCM7	Uncharacterized protein OS=Burkholderia ambifaria (strain ATCC BAA-244 / AMMD) OX=339670 GN=Bamb_2540 PE=4 SV=1 - [Q0BCM7_BURCM]	94.69	20.18	1	3	3	3	223	24.0409	5.10986
Q0B7D9	3-hydroxyisobutyrate dehydrogenase OS=Burkholderia ambifaria (strain ATCC BAA-244 / AMMD) OX=339670 GN=Bamb_4382 PE=3 SV=1 - [Q0B7D9_BURCM]	93.82	8.67	1	2	2	4	300	30.1533	6.52197
Q0BE91	Thioredoxin OS=Burkholderia ambifaria (strain ATCC BAA-244 / AMMD) OX=339670 GN=Bamb_1976 PE=3 SV=1 - [Q0BE91_BURCM]	93.37	25.69	1	2	2	3	109	12.0483	5.0083
Q0BBK7	Glutaredoxin OS=Burkholderia ambifaria (strain ATCC BAA-244 / AMMD) OX=339670 GN=Bamb_2910 PE=3 SV=1 - [Q0BBK7_BURCM]	93.35	44.19	1	3	3	6	86	9.8011	7.98682
Q0BIH8	GTPase Obg OS=Burkholderia ambifaria (strain ATCC BAA-244 / AMMD) OX=339670 GN=obg PE=3 SV=1 - [OBG_BURCM]	93.35	7.57	1	2	2	4	370	39.755	5.17334
Q0BJ39	50S ribosomal protein L16 OS=Burkholderia ambifaria (strain ATCC BAA-244 / AMMD) OX=339670 GN=rplP PE=3 SV=1 - [RL16_BURCM]	93.23	20.29	1	2	2	4	138	15.5725	11.1362
Q0B9L9	Acyl carrier protein OS=Burkholderia ambifaria (strain ATCC BAA-244 / AMMD) OX=339670 GN=acpP PE=3 SV=1 - [Q0B9L9_BURCM]	93.14	35.37	1	3	3	6	82	9.27889	4.90674
Q0BIK0	UDP-N-acetylmuramate--L-alanine ligase OS=Burkholderia ambifaria (strain ATCC BAA-244 / AMMD) OX=339670 GN=murC PE=3 SV=1 - [MURC_BURCM]	92.94	13.55	1	4	4	6	465	48.9484	6.01123
Q0B6W8	NAD-dependent epimerase/dehydratase OS=Burkholderia ambifaria (strain ATCC BAA-244 / AMMD) OX=339670 GN=Bamb_4555 PE=4 SV=1 - [Q0B6W8_BURCM]	92.91	22.29	1	5	5	7	323	34.5361	5.50342
Q0BDZ4	Hydroxymethylpyrimidine kinase / phosphomethylpyrimidine kinase OS=Burkholderia ambifaria (strain ATCC BAA-244 / AMMD) OX=339670 GN=Bamb_2073 PE=4 SV=1 - [Q0BDZ4_BURCM]	92.86	37.17	1	4	4	6	269	27.5423	6.37939
Q0B1P7	Histone family protein nucleoid-structuring protein H-NS OS=Burkholderia ambifaria (strain ATCC BAA-244 / AMMD) OX=339670 GN=Bamb_6382 PE=4 SV=1 - [Q0B1P7_BURCM]	92.06	23.23	1	2	2	3	99	10.8887	9.89111
Q0BCF4	Pirin domain protein OS=Burkholderia ambifaria (strain ATCC BAA-244 / AMMD) OX=339670 GN=Bamb_2613 PE=3 SV=1 - [Q0BCF4_BURCM]	90.15	15.02	1	4	4	5	293	31.4812	6.40479
Q0BG08	Endoribonuclease L-PSP OS=Burkholderia ambifaria (strain ATCC BAA-244 / AMMD) OX=339670 GN=Bamb_1357 PE=4 SV=1 - [Q0BG08_BURCM]	89.6	44.44	1	3	3	5	117	12.6265	5.40186
Q0BHU0	Amino acid ABC transporter substrate-binding protein, PAAT family OS=Burkholderia ambifaria (strain ATCC BAA-244 / AMMD) OX=339670 GN=Bamb_0724 PE=3 SV=1 - [Q0BHU0_BURCM]	88.61	27.03	1	4	4	4	259	27.6293	8.1333
Q0BF03	Uncharacterized protein OS=Burkholderia ambifaria (strain ATCC BAA-244 / AMMD) OX=339670 GN=Bamb_1714 PE=4 SV=1 - [Q0BF03_BURCM]	88.59	18.47	1	2	2	4	157	16.1503	9.24658
Q0BD72	Integral membrane protein-like protein OS=Burkholderia ambifaria (strain ATCC BAA-244 / AMMD) OX=339670 GN=Bamb_2345 PE=4 SV=1 - [Q0BD72_BURCM]	87.73	12.7	1	2	2	5	126	14.0279	8.5874
Q0B844	Porin, Gram-negative type OS=Burkholderia ambifaria (strain ATCC BAA-244 / AMMD) OX=339670 GN=Bamb_4126 PE=4 SV=1 - [Q0B844_BURCM]	87.39	5.91	1	2	2	3	372	38.6161	9.5249
Q0BB22	Uncharacterized protein OS=Burkholderia ambifaria (strain ATCC BAA-244 / AMMD) OX=339670 GN=Bamb_3095 PE=4 SV=1 - [Q0BB22_BURCM]	87.38	41.98	1	4	4	8	162	17.3309	6.63916
Q0BDE7	Acyl-CoA dehydrogenase domain protein OS=Burkholderia ambifaria (strain ATCC BAA-244 / AMMD) OX=339670 GN=Bamb_2270 PE=3 SV=1 - [Q0BDE7_BURCM]	86.9	6.03	1	2	2	3	398	44.2595	5.96045
Q0B1N8	Uncharacterized protein OS=Burkholderia ambifaria (strain ATCC BAA-244 / AMMD) OX=339670 GN=Bamb_6391 PE=4 SV=1 - [Q0B1N8_BURCM]	86.83	45.24	1	2	2	3	84	9.58419	5.8335
Q0BB43	Peptidase M24 OS=Burkholderia ambifaria (strain ATCC BAA-244 / AMMD) OX=339670 GN=Bamb_3074 PE=3 SV=1 - [Q0BB43_BURCM]	86.33	4.87	1	3	3	5	616	67.348	5.90967
Q0BAY2	Cobalamin synthesis protein, P47K OS=Burkholderia ambifaria (strain ATCC BAA-244 / AMMD) OX=339670 GN=Bamb_3135 PE=4 SV=1 - [Q0BAY2_BURCM]	86.16	13.14	1	3	3	3	388	43.1996	5.8335
Q0B848	GTP cyclohydrolase-2 OS=Burkholderia ambifaria (strain ATCC BAA-244 / AMMD) OX=339670 GN=ribA PE=3 SV=1 - [Q0B848_BURCM]	85.84	10.65	1	2	2	3	216	23.7759	5.64307
Q0BAX4	Acetylglutamate kinase OS=Burkholderia ambifaria (strain ATCC BAA-244 / AMMD) OX=339670 GN=argB PE=3 SV=2 - [ARGB_BURCM]	85.69	19.4	1	3	3	4	299	32.0509	5.2876
Q0B2I1	Uncharacterized protein OS=Burkholderia ambifaria (strain ATCC BAA-244 / AMMD) OX=339670 GN=Bamb_6098 PE=4 SV=1 - [Q0B2I1_BURCM]	85.53	12.91	1	4	4	7	395	41.482	8.32373
Q0BIR4	Uncharacterized protein OS=Burkholderia ambifaria (strain ATCC BAA-244 / AMMD) OX=339670 GN=Bamb_0400 PE=4 SV=1 - [Q0BIR4_BURCM]	83.84	40.91	1	4	4	6	110	12.2642	8.93896
Q0B5L9	Aldo/keto reductase OS=Burkholderia ambifaria (strain ATCC BAA-244 / AMMD) OX=339670 GN=Bamb_5005 PE=4 SV=1 - [Q0B5L9_BURCM]	83.56	19.05	1	4	4	8	315	34.0038	5.2749
Q0BEU6	50S ribosomal protein L31 type B OS=Burkholderia ambifaria (strain ATCC BAA-244 / AMMD) OX=339670 GN=rpmE2 PE=3 SV=1 - [RL31B_BURCM]	83.33	41.38	1	3	3	4	87	9.91307	9.64209
Q0BD28	Phenazine biosynthesis protein PhzF family OS=Burkholderia ambifaria (strain ATCC BAA-244 / AMMD) OX=339670 GN=Bamb_2389 PE=4 SV=1 - [Q0BD28_BURCM]	83.17	12.29	1	2	2	4	293	30.8664	5.13525
Q0BIW0	Histidine triad (HIT) protein OS=Burkholderia ambifaria (strain ATCC BAA-244 / AMMD) OX=339670 GN=Bamb_0353 PE=4 SV=1 - [Q0BIW0_BURCM]	82.93	38.02	1	4	4	6	121	13.1237	6.62451
Q0BAT3	Thioredoxin domain protein OS=Burkholderia ambifaria (strain ATCC BAA-244 / AMMD) OX=339670 GN=Bamb_3184 PE=4 SV=1 - [Q0BAT3_BURCM]	82.78	25.4	1	2	2	3	126	13.8658	4.52588
Q0BDR0	Uncharacterized protein OS=Burkholderia ambifaria (strain ATCC BAA-244 / AMMD) OX=339670 GN=Bamb_2157 PE=4 SV=1 - [Q0BDR0_BURCM]	82.45	49.28	1	3	3	5	69	8.01781	4.36084
Q0B3M2	TfoX, N-terminal domain protein OS=Burkholderia ambifaria (strain ATCC BAA-244 / AMMD) OX=339670 GN=Bamb_5704 PE=4 SV=1 - [Q0B3M2_BURCM]	82.43	15.83	1	2	2	3	120	13.3207	8.66064
Q0BAM6	Cytokinin riboside 5'-monophosphate phosphoribohydrolase OS=Burkholderia ambifaria (strain ATCC BAA-244 / AMMD) OX=339670 GN=Bamb_3242 PE=3 SV=1 - [Q0BAM6_BURCM]	82.11	32.54	1	4	4	6	252	27.9293	5.68115
Q0BI16	Anthranilate synthase component I and chorismate binding protein OS=Burkholderia ambifaria (strain ATCC BAA-244 / AMMD) OX=339670 GN=Bamb_0648 PE=4 SV=1 - [Q0BI16_BURCM]	81.95	8.29	1	3	4	6	639	68.5769	5.96045
Q0B957	Uncharacterized protein OS=Burkholderia ambifaria (strain ATCC BAA-244 / AMMD) OX=339670 GN=Bamb_3762 PE=4 SV=1 - [Q0B957_BURCM]	81.17	25.32	1	2	2	3	79	8.99422	6.15088
Q0BBQ8	Tetratricopeptide TPR_2 repeat protein OS=Burkholderia ambifaria (strain ATCC BAA-244 / AMMD) OX=339670 GN=Bamb_2859 PE=4 SV=1 - [Q0BBQ8_BURCM]	80.86	9.56	1	3	3	4	607	66.6086	7.1665
Q0BJA5	Uncharacterized protein OS=Burkholderia ambifaria (strain ATCC BAA-244 / AMMD) OX=339670 GN=Bamb_0208 PE=4 SV=1 - [Q0BJA5_BURCM]	80.71	14.42	1	2	2	3	208	22.7133	7.88428
Q0BAU5	Uncharacterized protein OS=Burkholderia ambifaria (strain ATCC BAA-244 / AMMD) OX=339670 GN=Bamb_3172 PE=4 SV=1 - [Q0BAU5_BURCM]	79.52	14	1	2	2	3	150	17.3098	6.13818
Q0BGS5	NAD-dependent epimerase/dehydratase OS=Burkholderia ambifaria (strain ATCC BAA-244 / AMMD) OX=339670 GN=Bamb_1089 PE=4 SV=1 - [Q0BGS5_BURCM]	79.5	26.29	1	3	3	5	213	21.8283	5.87158
Q0BCH0	Short-chain dehydrogenase/reductase SDR OS=Burkholderia ambifaria (strain ATCC BAA-244 / AMMD) OX=339670 GN=Bamb_2597 PE=3 SV=1 - [Q0BCH0_BURCM]	79.39	26.98	1	4	4	6	252	25.6403	7.15186
Q0B6Z8	DGPFAETKE family protein OS=Burkholderia ambifaria (strain ATCC BAA-244 / AMMD) OX=339670 GN=Bamb_4525 PE=4 SV=1 - [Q0B6Z8_BURCM]	79.29	25.17	1	2	2	3	143	15.9829	4.99561
Q0BH53	Thymidylate synthase OS=Burkholderia ambifaria (strain ATCC BAA-244 / AMMD) OX=339670 GN=thyA PE=3 SV=1 - [Q0BH53_BURCM]	79.14	8.36	1	2	2	3	323	36.6067	6.17627
Q0B2V4	Uncharacterized protein OS=Burkholderia ambifaria (strain ATCC BAA-244 / AMMD) OX=339670 GN=Bamb_5975 PE=4 SV=1 - [Q0B2V4_BURCM]	78.78	17.93	1	2	2	4	145	16.3671	4.25928
Q0BAG0	HpcH/HpaI aldolase OS=Burkholderia ambifaria (strain ATCC BAA-244 / AMMD) OX=339670 GN=Bamb_3308 PE=3 SV=1 - [Q0BAG0_BURCM]	78.69	11.98	1	3	3	6	334	35.6513	6.58057
Q0BES4	Aminotransferase OS=Burkholderia ambifaria (strain ATCC BAA-244 / AMMD) OX=339670 GN=Bamb_1793 PE=4 SV=1 - [Q0BES4_BURCM]	78.41	12.14	1	3	3	5	412	45.6425	5.73193
Q0BBK1	Phosphocarrier, HPr family OS=Burkholderia ambifaria (strain ATCC BAA-244 / AMMD) OX=339670 GN=Bamb_2916 PE=4 SV=1 - [Q0BBK1_BURCM]	78	30.34	1	2	2	3	89	9.61394	7.25439
Q0B2H2	Dihydrodipicolinate synthetase OS=Burkholderia ambifaria (strain ATCC BAA-244 / AMMD) OX=339670 GN=Bamb_6107 PE=3 SV=1 - [Q0B2H2_BURCM]	77.88	6.07	1	2	2	4	313	33.6891	6.93213
Q0BBA5	Alpha/beta hydrolase fold protein OS=Burkholderia ambifaria (strain ATCC BAA-244 / AMMD) OX=339670 GN=Bamb_3012 PE=4 SV=1 - [Q0BBA5_BURCM]	77.74	16.44	1	4	4	5	298	32.8864	6.72705
Q0BBZ5	3-hydroxyacyl-CoA dehydrogenase OS=Burkholderia ambifaria (strain ATCC BAA-244 / AMMD) OX=339670 GN=Bamb_2772 PE=4 SV=1 - [Q0BBZ5_BURCM]	77.57	12.08	1	8	8	9	811	87.4578	6.97607
Q0B2B9	High-potential iron-sulfur protein OS=Burkholderia ambifaria (strain ATCC BAA-244 / AMMD) OX=339670 GN=Bamb_6160 PE=3 SV=1 - [Q0B2B9_BURCM]	77.49	40	1	3	3	5	105	11.1023	8.85107
Q0BBY2	Histidine triad (HIT) protein OS=Burkholderia ambifaria (strain ATCC BAA-244 / AMMD) OX=339670 GN=Bamb_2785 PE=4 SV=1 - [Q0BBY2_BURCM]	77.34	18.37	1	2	2	4	147	16.8185	7.2251
Q0BD34	Chaperone protein HtpG OS=Burkholderia ambifaria (strain ATCC BAA-244 / AMMD) OX=339670 GN=htpG PE=3 SV=1 - [HTPG_BURCM]	77.09	14.56	1	6	6	7	632	71.1381	5.2876
Q0B2W2	Amidase, hydantoinase/carbamoylase family OS=Burkholderia ambifaria (strain ATCC BAA-244 / AMMD) OX=339670 GN=Bamb_5967 PE=4 SV=1 - [Q0B2W2_BURCM]	76.97	12.68	1	4	4	5	426	45.5389	5.59229
Q0BBZ6	Acetyl-CoA acetyltransferase OS=Burkholderia ambifaria (strain ATCC BAA-244 / AMMD) OX=339670 GN=Bamb_2771 PE=3 SV=1 - [Q0BBZ6_BURCM]	76.56	15.79	1	4	4	4	399	41.8676	6.44287
Q0B958	Uncharacterized protein OS=Burkholderia ambifaria (strain ATCC BAA-244 / AMMD) OX=339670 GN=Bamb_3761 PE=4 SV=1 - [Q0B958_BURCM]	76.02	18.56	1	1	2	3	97	10.6012	4.86865
Q0BHR1	dTDP-4-dehydrorhamnose 3,5-epimerase OS=Burkholderia ambifaria (strain ATCC BAA-244 / AMMD) OX=339670 GN=Bamb_0753 PE=3 SV=1 - [Q0BHR1_BURCM]	75.95	13.66	1	2	2	5	183	20.5144	5.5542
Q0BIM4	Phosphoglycolate phosphatase OS=Burkholderia ambifaria (strain ATCC BAA-244 / AMMD) OX=339670 GN=gph PE=3 SV=1 - [Q0BIM4_BURCM]	75.43	13.15	1	2	2	3	251	26.1805	5.61768
Q0BDU6	FAD dependent oxidoreductase OS=Burkholderia ambifaria (strain ATCC BAA-244 / AMMD) OX=339670 GN=Bamb_2121 PE=4 SV=1 - [Q0BDU6_BURCM]	75.41	7.04	1	3	3	4	540	58.6543	7.84033
Q0BDQ5	Iron-sulfur cluster assembly scaffold protein IscU OS=Burkholderia ambifaria (strain ATCC BAA-244 / AMMD) OX=339670 GN=Bamb_2162 PE=3 SV=1 - [Q0BDQ5_BURCM]	75.16	40.74	1	4	4	5	135	14.3071	5.31299
Q0B9W8	Alkyl hydroperoxide reductase/ Thiol specific antioxidant/ Mal allergen OS=Burkholderia ambifaria (strain ATCC BAA-244 / AMMD) OX=339670 GN=Bamb_3501 PE=4 SV=1 - [Q0B9W8_BURCM]	74.98	18.72	1	2	2	4	187	20.7435	5.23682
Q0BFY8	Aminotransferase OS=Burkholderia ambifaria (strain ATCC BAA-244 / AMMD) OX=339670 GN=Bamb_1377 PE=3 SV=1 - [Q0BFY8_BURCM]	74.64	11	1	3	3	4	400	42.562	6.44287
Q0BHM4	Uncharacterized protein OS=Burkholderia ambifaria (strain ATCC BAA-244 / AMMD) OX=339670 GN=Bamb_0790 PE=4 SV=1 - [Q0BHM4_BURCM]	74.51	25.88	1	2	2	3	85	9.34698	10.0669
Q0BAL4	30S ribosomal protein S21 OS=Burkholderia ambifaria (strain ATCC BAA-244 / AMMD) OX=339670 GN=rpsU PE=3 SV=1 - [Q0BAL4_BURCM]	74.18	31.43	1	3	3	5	70	8.52783	11.0337
Q0BH58	UPF0307 protein Bamb_0956 OS=Burkholderia ambifaria (strain ATCC BAA-244 / AMMD) OX=339670 GN=Bamb_0956 PE=3 SV=1 - [Q0BH58_BURCM]	73.63	21.18	1	3	3	4	203	23.1147	6.1001
Q0BI87	Tyrosine--tRNA ligase OS=Burkholderia ambifaria (strain ATCC BAA-244 / AMMD) OX=339670 GN=tyrS PE=3 SV=1 - [Q0BI87_BURCM]	73.53	8.72	1	2	2	2	413	45.5587	6.29053
Q0BGG5	Uncharacterized small conserved protein OS=Burkholderia ambifaria (strain ATCC BAA-244 / AMMD) OX=339670 GN=Bamb_1200 PE=4 SV=1 - [Q0BGG5_BURCM]	73.47	19.7	1	2	2	4	132	14.147	5.47803
Q0B974	N-isopropylammelide isopropylaminohydrolase OS=Burkholderia ambifaria (strain ATCC BAA-244 / AMMD) OX=339670 GN=Bamb_3745 PE=4 SV=1 - [Q0B974_BURCM]	73.38	12.83	1	3	3	5	413	45.3949	5.96045
Q0BEJ4	Uncharacterized protein OS=Burkholderia ambifaria (strain ATCC BAA-244 / AMMD) OX=339670 GN=Bamb_1873 PE=4 SV=1 - [Q0BEJ4_BURCM]	73.22	24.56	1	2	2	4	114	11.6751	5.38916
Q0BE26	3-hydroxyacyl-[acyl-carrier-protein] dehydratase FabZ OS=Burkholderia ambifaria (strain ATCC BAA-244 / AMMD) OX=339670 GN=fabZ PE=3 SV=2 - [FABZ_BURCM]	72.94	18.06	1	2	2	3	155	17.3514	7.50342
Q0B1S8	Haloacid dehalogenase, type II OS=Burkholderia ambifaria (strain ATCC BAA-244 / AMMD) OX=339670 GN=Bamb_6351 PE=4 SV=1 - [Q0B1S8_BURCM]	72.74	19.82	1	3	3	5	222	25.1775	6.63916
Q0BE00	Glutathione peroxidase OS=Burkholderia ambifaria (strain ATCC BAA-244 / AMMD) OX=339670 GN=Bamb_2067 PE=3 SV=1 - [Q0BE00_BURCM]	72.4	22.01	1	2	2	3	159	17.619	7.23975
Q0B2T0	Uncharacterized protein OS=Burkholderia ambifaria (strain ATCC BAA-244 / AMMD) OX=339670 GN=Bamb_5999 PE=4 SV=1 - [Q0B2T0_BURCM]	71.56	20.37	1	2	2	6	108	11.306	10.1694
Q0BBD7	Aminotransferase OS=Burkholderia ambifaria (strain ATCC BAA-244 / AMMD) OX=339670 GN=Bamb_2980 PE=3 SV=1 - [Q0BBD7_BURCM]	71.52	7.63	1	2	2	2	459	50.2114	6.30322
Q0B8K0	Pyrimidine/purine nucleoside phosphorylase OS=Burkholderia ambifaria (strain ATCC BAA-244 / AMMD) OX=339670 GN=ppnP PE=3 SV=1 - [PPNP_BURCM]	70.29	44.34	1	3	3	7	106	11.6147	5.13525
Q0BCR1	Cell division protein ZapA OS=Burkholderia ambifaria (strain ATCC BAA-244 / AMMD) OX=339670 GN=Bamb_2506 PE=4 SV=1 - [Q0BCR1_BURCM]	69.91	25.96	1	2	2	3	104	11.3998	6.29053
Q0BAS3	Phosphonoacetate hydrolase OS=Burkholderia ambifaria (strain ATCC BAA-244 / AMMD) OX=339670 GN=Bamb_3194 PE=4 SV=1 - [Q0BAS3_BURCM]	68.95	19.17	1	4	4	5	412	44.623	5.40186
Q0BEE1	Two component transcriptional regulator, winged helix family OS=Burkholderia ambifaria (strain ATCC BAA-244 / AMMD) OX=339670 GN=Bamb_1926 PE=4 SV=1 - [Q0BEE1_BURCM]	68.53	9.43	1	2	2	4	244	27.6595	6.15088
Q0BIL4	Molybdopterin oxidoreductase OS=Burkholderia ambifaria (strain ATCC BAA-244 / AMMD) OX=339670 GN=Bamb_0450 PE=3 SV=1 - [Q0BIL4_BURCM]	68.38	7.09	1	3	3	3	691	75.1263	6.96143
Q0B600	Uncharacterized protein OS=Burkholderia ambifaria (strain ATCC BAA-244 / AMMD) OX=339670 GN=Bamb_4874 PE=4 SV=1 - [Q0B600_BURCM]	68.34	9.03	1	3	3	4	465	47.6207	5.32568
Q0BBY9	Putative regulatory protein, FmdB family OS=Burkholderia ambifaria (strain ATCC BAA-244 / AMMD) OX=339670 GN=Bamb_2778 PE=4 SV=1 - [Q0BBY9_BURCM]	68.3	18.02	1	2	2	4	111	10.8331	6.46826
Q0BJK2	Amino acid ABC transporter substrate-binding protein, PAAT family OS=Burkholderia ambifaria (strain ATCC BAA-244 / AMMD) OX=339670 GN=Bamb_0110 PE=3 SV=1 - [Q0BJK2_BURCM]	67.72	19.22	1	3	3	4	281	30.0167	9.40771
Q0B8H8	Amino acid ABC transporter substrate-binding protein, PAAT family OS=Burkholderia ambifaria (strain ATCC BAA-244 / AMMD) OX=339670 GN=Bamb_3991 PE=4 SV=1 - [Q0B8H8_BURCM]	67.37	9.73	1	2	2	3	298	32.8268	8.86572
Q0BAM9	Uncharacterized protein OS=Burkholderia ambifaria (strain ATCC BAA-244 / AMMD) OX=339670 GN=Bamb_3238 PE=4 SV=1 - [Q0BAM9_BURCM]	67.35	20.63	1	2	2	3	160	17.7831	5.56689
Q0BGW9	Phospholipase C OS=Burkholderia ambifaria (strain ATCC BAA-244 / AMMD) OX=339670 GN=Bamb_1045 PE=4 SV=1 - [Q0BGW9_BURCM]	67.08	6.72	1	3	3	4	714	78.4708	6.63916
Q0BIA9	6-phosphogluconate dehydratase OS=Burkholderia ambifaria (strain ATCC BAA-244 / AMMD) OX=339670 GN=Bamb_0555 PE=3 SV=1 - [Q0BIA9_BURCM]	67.06	10.52	1	4	4	7	618	65.1947	6.56592
Q0B4Y4	Transcriptional regulator, LysR family OS=Burkholderia ambifaria (strain ATCC BAA-244 / AMMD) OX=339670 GN=Bamb_5241 PE=4 SV=1 - [Q0B4Y4_BURCM]	66.95	8.83	1	2	2	3	317	35.0958	5.17334
Q0BH09	Sigma E regulatory protein, MucB/RseB OS=Burkholderia ambifaria (strain ATCC BAA-244 / AMMD) OX=339670 GN=Bamb_1005 PE=4 SV=1 - [Q0BH09_BURCM]	66.9	11.43	1	3	3	4	350	38.351	9.0415
Q0BIP5	Isochorismatase hydrolase OS=Burkholderia ambifaria (strain ATCC BAA-244 / AMMD) OX=339670 GN=Bamb_0419 PE=4 SV=1 - [Q0BIP5_BURCM]	66.6	17.49	1	3	3	5	183	19.904	6.07471
Q0BGD3	Aldehyde oxidase and xanthine dehydrogenase, molybdopterin binding protein OS=Burkholderia ambifaria (strain ATCC BAA-244 / AMMD) OX=339670 GN=Bamb_1232 PE=4 SV=1 - [Q0BGD3_BURCM]	66.57	7.88	1	3	3	4	774	81.8058	8.44092
Q0BI08	Uncharacterized protein OS=Burkholderia ambifaria (strain ATCC BAA-244 / AMMD) OX=339670 GN=Bamb_0656 PE=4 SV=1 - [Q0BI08_BURCM]	66.32	39.69	1	3	3	4	131	14.5154	5.63037
Q0B5Z7	Radical SAM domain protein OS=Burkholderia ambifaria (strain ATCC BAA-244 / AMMD) OX=339670 GN=Bamb_4877 PE=4 SV=1 - [Q0B5Z7_BURCM]	66.21	13.99	1	3	3	3	386	43.445	8.29443
Q0BER8	Formyl transferase domain protein OS=Burkholderia ambifaria (strain ATCC BAA-244 / AMMD) OX=339670 GN=Bamb_1799 PE=4 SV=1 - [Q0BER8_BURCM]	66.01	8.89	1	2	2	2	315	33.5582	6.37939
Q0BIR9	Uncharacterized protein OS=Burkholderia ambifaria (strain ATCC BAA-244 / AMMD) OX=339670 GN=Bamb_0395 PE=4 SV=1 - [Q0BIR9_BURCM]	65.9	6.81	1	2	2	4	323	32.2044	9.46631
Q0B132	Uncharacterized protein OS=Burkholderia ambifaria (strain ATCC BAA-244 / AMMD) OX=339670 GN=Bamb_6598 PE=4 SV=1 - [Q0B132_BURCM]	65.83	22.35	1	2	2	4	85	9.29889	7.97217
Q0BIS7	ATPase AAA-2 domain protein OS=Burkholderia ambifaria (strain ATCC BAA-244 / AMMD) OX=339670 GN=Bamb_0387 PE=4 SV=1 - [Q0BIS7_BURCM]	65.69	2.59	1	2	2	4	889	96.4853	5.45264
Q0BFZ5	Uncharacterized protein OS=Burkholderia ambifaria (strain ATCC BAA-244 / AMMD) OX=339670 GN=Bamb_1370 PE=4 SV=1 - [Q0BFZ5_BURCM]	65.56	51.76	1	2	2	2	85	9.60884	4.75439
Q0BBN3	N-acetylglucosamine 6-phosphate deacetylase OS=Burkholderia ambifaria (strain ATCC BAA-244 / AMMD) OX=339670 GN=Bamb_2884 PE=3 SV=1 - [Q0BBN3_BURCM]	65.29	10.08	1	2	2	2	367	38.5798	5.92236
Q0B933	UspA domain protein OS=Burkholderia ambifaria (strain ATCC BAA-244 / AMMD) OX=339670 GN=Bamb_3786 PE=4 SV=1 - [Q0B933_BURCM]	65.21	6.75	1	2	2	4	311	33.0205	6.75635
Q0B9M6	Gamma-glutamyltransferase 1, Threonine peptidase, MEROPS family T03 OS=Burkholderia ambifaria (strain ATCC BAA-244 / AMMD) OX=339670 GN=Bamb_3593 PE=4 SV=1 - [Q0B9M6_BURCM]	64.3	10.12	1	4	4	4	573	61.6806	8.82178
Q0BHF4	DNA-directed RNA polymerase subunit omega OS=Burkholderia ambifaria (strain ATCC BAA-244 / AMMD) OX=339670 GN=rpoZ PE=3 SV=1 - [RPOZ_BURCM]	64.24	47.76	1	3	3	4	67	7.42409	9.71533
Q0B692	Uncharacterized protein OS=Burkholderia ambifaria (strain ATCC BAA-244 / AMMD) OX=339670 GN=Bamb_4781 PE=4 SV=1 - [Q0B692_BURCM]	63.82	33.53	1	3	3	4	170	18.5815	7.26904
Q0BAF0	Glyoxalase/bleomycin resistance protein/dioxygenase OS=Burkholderia ambifaria (strain ATCC BAA-244 / AMMD) OX=339670 GN=Bamb_3318 PE=4 SV=1 - [Q0BAF0_BURCM]	63.53	38.76	1	4	4	7	129	14.4709	6.85889
Q0B569	1-aminocyclopropane-1-carboxylate deaminase OS=Burkholderia ambifaria (strain ATCC BAA-244 / AMMD) OX=339670 GN=acdS PE=3 SV=1 - [1A1D_BURCM]	61.97	19.23	1	4	4	5	338	36.7426	6.18896
Q0B947	Uncharacterized protein OS=Burkholderia ambifaria (strain ATCC BAA-244 / AMMD) OX=339670 GN=Bamb_3772 PE=4 SV=1 - [Q0B947_BURCM]	61.85	14.68	1	2	2	5	109	11.4078	9.18799
Q0BHG9	Cell division topological specificity factor OS=Burkholderia ambifaria (strain ATCC BAA-244 / AMMD) OX=339670 GN=minE PE=3 SV=1 - [MINE_BURCM]	61.77	22.62	1	2	2	3	84	9.43323	7.25439
Q0B4J3	Uncharacterized protein OS=Burkholderia ambifaria (strain ATCC BAA-244 / AMMD) OX=339670 GN=Bamb_5383 PE=4 SV=1 - [Q0B4J3_BURCM]	60.82	20.47	1	2	2	3	127	13.93	5.5415
[truncated: 108 more rows]

## Sheet: 6h_3
Accession	Description	Score	Coverage	# Proteins	# Unique Peptides	# Peptides	# PSMs	# AAs	MW [kDa]	calc. pI
[truncated: 1,114 more rows]

## Sheet: 8h_1
Accession	Description	Score	Coverage	# Proteins	# Unique Peptides	# Peptides	# PSMs	# AAs	MW [kDa]	calc. pI
[truncated: 1,205 more rows]

[truncated: 12 more sheets: 8h_2, 8h_3, 10h_1, 10h_2, 10h_3, 6h_Peptides_CAA_modified, 8h_Peptides_CAA_modified, 10h_Peptides_CAA_modified, 6h_1 (2), 6h_2 (2), 13h_1, 13h_2]
